# Supplementary material for: Predicting Cloned Disease Resistance Gene Homologs (CDRHs) in Radish, Underutilised Oilseeds, and Wild Brassicaceae Species
Source: MDPI journal article supplement (doi:10.3390/plants11223010), 2022-11-08
Supplement: s1 [file s1]

**Table S1.** List of resistance gene analogs (RGAs) in *Brassica cretica*, *Capsella bursa-pastoris*, and *Sinapis alba* using the in-silico prediction of RGAugury pipeline.

| Species             | Gene name    | RGA main class | RGA subclass |
|---------------------|--------------|----------------|--------------|
| <i>Sinapis alba</i> | KAF8088211.1 | NLR            | CN           |
| <i>Sinapis alba</i> | KAF8084614.1 | NLR            | CN           |
| <i>Sinapis alba</i> | KAF8044555.1 | NLR            | CN           |
| <i>Sinapis alba</i> | KAF8048787.1 | NLR            | CN           |
| <i>Sinapis alba</i> | KAF8044716.1 | NLR            | CN           |
| <i>Sinapis alba</i> | KAF8068139.1 | NLR            | CNL          |
| <i>Sinapis alba</i> | KAF8046585.1 | NLR            | CNL          |
| <i>Sinapis alba</i> | KAF8102307.1 | NLR            | CNL          |
| <i>Sinapis alba</i> | KAF8064789.1 | NLR            | CNL          |
| <i>Sinapis alba</i> | KAF8080154.1 | NLR            | CNL          |
| <i>Sinapis alba</i> | KAF8114000.1 | NLR            | CNL          |
| <i>Sinapis alba</i> | KAF8098470.1 | NLR            | CNL          |
| <i>Sinapis alba</i> | KAF8058996.1 | NLR            | CNL          |
| <i>Sinapis alba</i> | KAF8116723.1 | NLR            | CNL          |
| <i>Sinapis alba</i> | KAF8098474.1 | NLR            | CNL          |
| <i>Sinapis alba</i> | KAF8084217.1 | NLR            | CNL          |
| <i>Sinapis alba</i> | KAF8081474.1 | NLR            | CNL          |
| <i>Sinapis alba</i> | KAF8101058.1 | NLR            | CNL          |
| <i>Sinapis alba</i> | KAF8101775.1 | NLR            | CNL          |
| <i>Sinapis alba</i> | KAF8105611.1 | NLR            | CNL          |
| <i>Sinapis alba</i> | KAF8105615.1 | NLR            | CNL          |
| <i>Sinapis alba</i> | KAF8105614.1 | NLR            | CNL          |
| <i>Sinapis alba</i> | KAF8088207.1 | NLR            | CNL          |
| <i>Sinapis alba</i> | KAF8118946.1 | NLR            | CNL          |
| <i>Sinapis alba</i> | KAF8093800.1 | NLR            | CNL          |
| <i>Sinapis alba</i> | KAF8111125.1 | NLR            | CNL          |
| <i>Sinapis alba</i> | KAF8098363.1 | NLR            | CNL          |
| <i>Sinapis alba</i> | KAF8111118.1 | NLR            | CNL          |
| <i>Sinapis alba</i> | KAF8051409.1 | NLR            | CNL          |
| <i>Sinapis alba</i> | KAF8101461.1 | NLR            | CNL          |
| <i>Sinapis alba</i> | KAF8116607.1 | NLR            | CNL          |
| <i>Sinapis alba</i> | KAF8111124.1 | NLR            | CNL          |
| <i>Sinapis alba</i> | KAF8096637.1 | NLR            | CNL          |
| <i>Sinapis alba</i> | KAF8087363.1 | NLR            | CNL          |
| <i>Sinapis alba</i> | KAF8048790.1 | NLR            | CNL          |
| <i>Sinapis alba</i> | KAF8117183.1 | NLR            | CNL          |
| <i>Sinapis alba</i> | KAF8114226.1 | NLR            | CNL          |
| <i>Sinapis alba</i> | KAF8062888.1 | NLR            | CNL          |
| <i>Sinapis alba</i> | KAF8075667.1 | NLR            | CNL          |
| <i>Sinapis alba</i> | KAF8112165.1 | NLR            | CNL          |
| <i>Sinapis alba</i> | KAF8075663.1 | NLR            | NBS          |
| <i>Sinapis alba</i> | KAF8116610.1 | NLR            | NBS          |
| <i>Sinapis alba</i> | KAF8087782.1 | NLR            | NBS          |
| <i>Sinapis alba</i> | KAF8117245.1 | NLR            | NBS          |
| <i>Sinapis alba</i> | KAF8045329.1 | NLR            | NBS          |
| <i>Sinapis alba</i> | KAF8092035.1 | NLR            | NBS          |
| <i>Sinapis alba</i> | KAF8090023.1 | NLR            | NBS          |
| <i>Sinapis alba</i> | KAF8050205.1 | NLR            | NL           |
| <i>Sinapis alba</i> | KAF8090380.1 | NLR            | NL           |
| <i>Sinapis alba</i> | KAF8085476.1 | NLR            | NL           |
| <i>Sinapis alba</i> | KAF8117260.1 | NLR            | NL           |
| <i>Sinapis alba</i> | KAF8045188.1 | NLR            | NL           |
| <i>Sinapis alba</i> | KAF8048786.1 | NLR            | NL           |
| <i>Sinapis alba</i> | KAF8092678.1 | NLR            | NL           |
| <i>Sinapis alba</i> | KAF8090867.1 | NLR            | NL           |
| <i>Sinapis alba</i> | KAF8058994.1 | NLR            | NL           |
| <i>Sinapis alba</i> | KAF8115254.1 | NLR            | NL           |
| <i>Sinapis alba</i> | KAF8088212.1 | NLR            | NL           |
| <i>Sinapis alba</i> | KAF8086877.1 | NLR            | NL           |

|                     |              |     |           |
|---------------------|--------------|-----|-----------|
| <i>Sinapis alba</i> | KAF8081484.1 | NLR | NL        |
| <i>Sinapis alba</i> | KAF8087542.1 | NLR | NL        |
| <i>Sinapis alba</i> | KAF8085594.1 | NLR | NL        |
| <i>Sinapis alba</i> | KAF8092033.1 | NLR | NL        |
| <i>Sinapis alba</i> | KAF8085331.1 | NLR | NL        |
| <i>Sinapis alba</i> | KAF8101662.1 | NLR | NL        |
| <i>Sinapis alba</i> | KAF8094635.1 | NLR | NL        |
| <i>Sinapis alba</i> | KAF8087560.1 | NLR | NL        |
| <i>Sinapis alba</i> | KAF8048268.1 | NLR | NL        |
| <i>Sinapis alba</i> | KAF8097061.1 | NLR | NL        |
| <i>Sinapis alba</i> | KAF8093454.1 | NLR | NL        |
| <i>Sinapis alba</i> | KAF8117197.1 | NLR | NL        |
| <i>Sinapis alba</i> | KAF8087218.1 | NLR | NL        |
| <i>Sinapis alba</i> | KAF8117264.1 | NLR | NL        |
| <i>Sinapis alba</i> | KAF8115077.1 | NLR | Other-NLR |
| <i>Sinapis alba</i> | KAF8084593.1 | NLR | Other-NLR |
| <i>Sinapis alba</i> | KAF8114969.1 | NLR | Other-NLR |
| <i>Sinapis alba</i> | KAF8092032.1 | NLR | Other-NLR |
| <i>Sinapis alba</i> | KAF8049004.1 | NLR | Other-NLR |
| <i>Sinapis alba</i> | KAF8114287.1 | NLR | Other-NLR |
| <i>Sinapis alba</i> | KAF8045627.1 | NLR | Other-NLR |
| <i>Sinapis alba</i> | KAF8051100.1 | NLR | TN        |
| <i>Sinapis alba</i> | KAF8051466.1 | NLR | TN        |
| <i>Sinapis alba</i> | KAF8079928.1 | NLR | TN        |
| <i>Sinapis alba</i> | KAF8044651.1 | NLR | TN        |
| <i>Sinapis alba</i> | KAF8087785.1 | NLR | TN        |
| <i>Sinapis alba</i> | KAF8087787.1 | NLR | TN        |
| <i>Sinapis alba</i> | KAF8111292.1 | NLR | TN        |
| <i>Sinapis alba</i> | KAF8087781.1 | NLR | TN        |
| <i>Sinapis alba</i> | KAF8099129.1 | NLR | TN        |
| <i>Sinapis alba</i> | KAF8089379.1 | NLR | TN        |
| <i>Sinapis alba</i> | KAF8111293.1 | NLR | TN        |
| <i>Sinapis alba</i> | KAF8086279.1 | NLR | TN        |
| <i>Sinapis alba</i> | KAF8089377.1 | NLR | TN        |
| <i>Sinapis alba</i> | KAF8048616.1 | NLR | TN        |
| <i>Sinapis alba</i> | KAF8074292.1 | NLR | TN        |
| <i>Sinapis alba</i> | KAF8087792.1 | NLR | TN        |
| <i>Sinapis alba</i> | KAF8077334.1 | NLR | TN        |
| <i>Sinapis alba</i> | KAF8052724.1 | NLR | TN        |
| <i>Sinapis alba</i> | KAF8084295.1 | NLR | TN        |
| <i>Sinapis alba</i> | KAF8117268.1 | NLR | TN        |
| <i>Sinapis alba</i> | KAF8087964.1 | NLR | TN        |
| <i>Sinapis alba</i> | KAF8089378.1 | NLR | TN        |
| <i>Sinapis alba</i> | KAF8090866.1 | NLR | TN        |
| <i>Sinapis alba</i> | KAF8115160.1 | NLR | TNL       |
| <i>Sinapis alba</i> | KAF8077026.1 | NLR | TNL       |
| <i>Sinapis alba</i> | KAF8117269.1 | NLR | TNL       |
| <i>Sinapis alba</i> | KAF8083605.1 | NLR | TNL       |
| <i>Sinapis alba</i> | KAF8084537.1 | NLR | TNL       |
| <i>Sinapis alba</i> | KAF8115078.1 | NLR | TNL       |
| <i>Sinapis alba</i> | KAF8087540.1 | NLR | TNL       |
| <i>Sinapis alba</i> | KAF8107619.1 | NLR | TNL       |
| <i>Sinapis alba</i> | KAF8093263.1 | NLR | TNL       |
| <i>Sinapis alba</i> | KAF8082878.1 | NLR | TNL       |
| <i>Sinapis alba</i> | KAF8054566.1 | NLR | TNL       |
| <i>Sinapis alba</i> | KAF8081015.1 | NLR | TNL       |
| <i>Sinapis alba</i> | KAF8081016.1 | NLR | TNL       |
| <i>Sinapis alba</i> | KAF8094299.1 | NLR | TNL       |
| <i>Sinapis alba</i> | KAF8085334.1 | NLR | TNL       |
| <i>Sinapis alba</i> | KAF8086735.1 | NLR | TNL       |
| <i>Sinapis alba</i> | KAF8085330.1 | NLR | TNL       |
| <i>Sinapis alba</i> | KAF8085335.1 | NLR | TNL       |

|                     |              |     |     |
|---------------------|--------------|-----|-----|
| <i>Sinapis alba</i> | KAF8107352.1 | NLR | TNL |
| <i>Sinapis alba</i> | KAF8079927.1 | NLR | TNL |
| <i>Sinapis alba</i> | KAF8085333.1 | NLR | TNL |
| <i>Sinapis alba</i> | KAF8112756.1 | NLR | TNL |
| <i>Sinapis alba</i> | KAF8087793.1 | NLR | TNL |
| <i>Sinapis alba</i> | KAF8094300.1 | NLR | TNL |
| <i>Sinapis alba</i> | KAF8117196.1 | NLR | TNL |
| <i>Sinapis alba</i> | KAF8103319.1 | NLR | TNL |
| <i>Sinapis alba</i> | KAF8102896.1 | NLR | TNL |
| <i>Sinapis alba</i> | KAF8092526.1 | NLR | TNL |
| <i>Sinapis alba</i> | KAF8087561.1 | NLR | TNL |
| <i>Sinapis alba</i> | KAF8117174.1 | NLR | TNL |
| <i>Sinapis alba</i> | KAF8044711.1 | NLR | TNL |
| <i>Sinapis alba</i> | KAF8101661.1 | NLR | TNL |
| <i>Sinapis alba</i> | KAF8102895.1 | NLR | TNL |
| <i>Sinapis alba</i> | KAF8082977.1 | NLR | TNL |
| <i>Sinapis alba</i> | KAF8113217.1 | NLR | TNL |
| <i>Sinapis alba</i> | KAF8052281.1 | NLR | TNL |
| <i>Sinapis alba</i> | KAF8107617.1 | NLR | TNL |
| <i>Sinapis alba</i> | KAF8101393.1 | NLR | TNL |
| <i>Sinapis alba</i> | KAF8102897.1 | NLR | TNL |
| <i>Sinapis alba</i> | KAF8087558.1 | NLR | TNL |
| <i>Sinapis alba</i> | KAF8107618.1 | NLR | TNL |
| <i>Sinapis alba</i> | KAF8091619.1 | NLR | TNL |
| <i>Sinapis alba</i> | KAF8085329.1 | NLR | TNL |
| <i>Sinapis alba</i> | KAF8086734.1 | NLR | TNL |
| <i>Sinapis alba</i> | KAF8107622.1 | NLR | TNL |
| <i>Sinapis alba</i> | KAF8063929.1 | NLR | TNL |
| <i>Sinapis alba</i> | KAF8118181.1 | NLR | TNL |
| <i>Sinapis alba</i> | KAF8107623.1 | NLR | TNL |
| <i>Sinapis alba</i> | KAF8114288.1 | NLR | TNL |
| <i>Sinapis alba</i> | KAF8112851.1 | NLR | TNL |
| <i>Sinapis alba</i> | KAF8090420.1 | NLR | TNL |
| <i>Sinapis alba</i> | KAF8087559.1 | NLR | TNL |
| <i>Sinapis alba</i> | KAF8088333.1 | NLR | TNL |
| <i>Sinapis alba</i> | KAF8110122.1 | NLR | TNL |
| <i>Sinapis alba</i> | KAF8103454.1 | NLR | TNL |
| <i>Sinapis alba</i> | KAF8085338.1 | NLR | TNL |
| <i>Sinapis alba</i> | KAF8117194.1 | NLR | TNL |
| <i>Sinapis alba</i> | KAF8075560.1 | NLR | TNL |
| <i>Sinapis alba</i> | KAF8113643.1 | NLR | TNL |
| <i>Sinapis alba</i> | KAF8087049.1 | NLR | TNL |
| <i>Sinapis alba</i> | KAF8114966.1 | NLR | TNL |
| <i>Sinapis alba</i> | KAF8051630.1 | NLR | TX  |
| <i>Sinapis alba</i> | KAF8114188.1 | NLR | TX  |
| <i>Sinapis alba</i> | KAF8044993.1 | NLR | TX  |
| <i>Sinapis alba</i> | KAF8116992.1 | NLR | TX  |
| <i>Sinapis alba</i> | KAF8077328.1 | NLR | TX  |
| <i>Sinapis alba</i> | KAF8118622.1 | NLR | TX  |
| <i>Sinapis alba</i> | KAF8081485.1 | NLR | TX  |
| <i>Sinapis alba</i> | KAF8044634.1 | NLR | TX  |
| <i>Sinapis alba</i> | KAF8084600.1 | NLR | TX  |
| <i>Sinapis alba</i> | KAF8048254.1 | NLR | TX  |
| <i>Sinapis alba</i> | KAF8084220.1 | NLR | TX  |
| <i>Sinapis alba</i> | KAF8079625.1 | NLR | TX  |
| <i>Sinapis alba</i> | KAF8053077.1 | NLR | TX  |
| <i>Sinapis alba</i> | KAF8077018.1 | NLR | TX  |
| <i>Sinapis alba</i> | KAF8062891.1 | NLR | TX  |
| <i>Sinapis alba</i> | KAF8117581.1 | NLR | TX  |
| <i>Sinapis alba</i> | KAF8085332.1 | NLR | TX  |
| <i>Sinapis alba</i> | KAF8110078.1 | NLR | TX  |
| <i>Sinapis alba</i> | KAF8091102.1 | NLR | TX  |

|                     |              |     |           |
|---------------------|--------------|-----|-----------|
| <i>Sinapis alba</i> | KAF8074230.1 | NLR | TX        |
| <i>Sinapis alba</i> | KAF8109700.1 | NLR | TX        |
| <i>Sinapis alba</i> | KAF8092034.1 | NLR | TX        |
| <i>Sinapis alba</i> | KAF8087555.1 | NLR | TX        |
| <i>Sinapis alba</i> | KAF8087525.1 | NLR | TX        |
| <i>Sinapis alba</i> | KAF8085339.1 | NLR | TX        |
| <i>Sinapis alba</i> | KAF8102891.1 | NLR | TX        |
| <i>Sinapis alba</i> | KAF8117271.1 | NLR | TX        |
| <i>Sinapis alba</i> | KAF8086733.1 | NLR | TX        |
| <i>Sinapis alba</i> | KAF8045278.1 | NLR | TX        |
| <i>Sinapis alba</i> | KAF8087217.1 | NLR | TX        |
| <i>Sinapis alba</i> | KAF8084567.1 | NLR | TX        |
| <i>Sinapis alba</i> | KAF8094551.1 | NLR | TX        |
| <i>Sinapis alba</i> | KAF8061229.1 | NLR | TX        |
| <i>Sinapis alba</i> | KAF8077327.1 | NLR | TX        |
| <i>Sinapis alba</i> | KAF8084596.1 | NLR | TX        |
| <i>Sinapis alba</i> | KAF8051322.1 | NLR | TX        |
| <i>Sinapis alba</i> | KAF8064811.1 | NLR | TX        |
| <i>Sinapis alba</i> | KAF8117262.1 | NLR | TX        |
| <i>Sinapis alba</i> | KAF8118565.1 | NLR | TX        |
| <i>Sinapis alba</i> | KAF8087783.1 | NLR | TX        |
| <i>Sinapis alba</i> | KAF8046000.1 | NLR | TX        |
| <i>Sinapis alba</i> | KAF8050416.1 | NLR | TX        |
| <i>Sinapis alba</i> | KAF8054526.1 | NLR | TX        |
| <i>Sinapis alba</i> | KAF8117263.1 | NLR | TX        |
| <i>Sinapis alba</i> | KAF8044581.1 | RLK | Other-RLK |
| <i>Sinapis alba</i> | KAF8044605.1 | RLK | LRR       |
| <i>Sinapis alba</i> | KAF8044830.1 | RLK | Other-RLK |
| <i>Sinapis alba</i> | KAF8045075.1 | RLK | Other-RLK |
| <i>Sinapis alba</i> | KAF8045097.1 | RLK | LRR       |
| <i>Sinapis alba</i> | KAF8045121.1 | RLK | LRR       |
| <i>Sinapis alba</i> | KAF8045145.1 | RLK | Other-RLK |
| <i>Sinapis alba</i> | KAF8045146.1 | RLK | Other-RLK |
| <i>Sinapis alba</i> | KAF8045147.1 | RLK | Other-RLK |
| <i>Sinapis alba</i> | KAF8045148.1 | RLK | Other-RLK |
| <i>Sinapis alba</i> | KAF8045149.1 | RLK | Other-RLK |
| <i>Sinapis alba</i> | KAF8045150.1 | RLK | Other-RLK |
| <i>Sinapis alba</i> | KAF8045175.1 | RLK | Other-RLK |
| <i>Sinapis alba</i> | KAF8045406.1 | RLK | Other-RLK |
| <i>Sinapis alba</i> | KAF8045471.1 | RLK | Other-RLK |
| <i>Sinapis alba</i> | KAF8045476.1 | RLK | Other-RLK |
| <i>Sinapis alba</i> | KAF8045724.1 | RLK | LRR       |
| <i>Sinapis alba</i> | KAF8045727.1 | RLK | LRR       |
| <i>Sinapis alba</i> | KAF8045753.1 | RLK | Other-RLK |
| <i>Sinapis alba</i> | KAF8045754.1 | RLK | Other-RLK |
| <i>Sinapis alba</i> | KAF8045774.1 | RLK | LRR       |
| <i>Sinapis alba</i> | KAF8045781.1 | RLK | LRR       |
| <i>Sinapis alba</i> | KAF8045826.1 | RLK | LRR       |
| <i>Sinapis alba</i> | KAF8045977.1 | RLK | Other-RLK |
| <i>Sinapis alba</i> | KAF8046042.1 | RLK | LRR       |
| <i>Sinapis alba</i> | KAF8046082.1 | RLK | Other-RLK |
| <i>Sinapis alba</i> | KAF8046083.1 | RLK | Other-RLK |
| <i>Sinapis alba</i> | KAF8046134.1 | RLK | Other-RLK |
| <i>Sinapis alba</i> | KAF8046138.1 | RLK | Other-RLK |
| <i>Sinapis alba</i> | KAF8046159.1 | RLK | LRR       |
| <i>Sinapis alba</i> | KAF8046254.1 | RLK | Other-RLK |
| <i>Sinapis alba</i> | KAF8046256.1 | RLK | LRR       |
| <i>Sinapis alba</i> | KAF8046393.1 | RLK | Other-RLK |
| <i>Sinapis alba</i> | KAF8046394.1 | RLK | Other-RLK |
| <i>Sinapis alba</i> | KAF8046395.1 | RLK | Other-RLK |
| <i>Sinapis alba</i> | KAF8046438.1 | RLK | Other-RLK |
| <i>Sinapis alba</i> | KAF8046613.1 | RLK | LRR       |

|                     |              |     |           |
|---------------------|--------------|-----|-----------|
| <i>Sinapis alba</i> | KAF8046626.1 | RLK | Other-RLK |
| <i>Sinapis alba</i> | KAF8046873.1 | RLK | Other-RLK |
| <i>Sinapis alba</i> | KAF8046876.1 | RLK | Other-RLK |
| <i>Sinapis alba</i> | KAF8046877.1 | RLK | Other-RLK |
| <i>Sinapis alba</i> | KAF8046878.1 | RLK | Other-RLK |
| <i>Sinapis alba</i> | KAF8046896.1 | RLK | Other-RLK |
| <i>Sinapis alba</i> | KAF8046954.1 | RLK | Other-RLK |
| <i>Sinapis alba</i> | KAF8047075.1 | RLK | Other-RLK |
| <i>Sinapis alba</i> | KAF8047283.1 | RLK | Other-RLK |
| <i>Sinapis alba</i> | KAF8047285.1 | RLK | Other-RLK |
| <i>Sinapis alba</i> | KAF8047286.1 | RLK | Other-RLK |
| <i>Sinapis alba</i> | KAF8047287.1 | RLK | Other-RLK |
| <i>Sinapis alba</i> | KAF8047296.1 | RLK | Other-RLK |
| <i>Sinapis alba</i> | KAF8047306.1 | RLK | Other-RLK |
| <i>Sinapis alba</i> | KAF8047419.1 | RLK | Other-RLK |
| <i>Sinapis alba</i> | KAF8047494.1 | RLK | Other-RLK |
| <i>Sinapis alba</i> | KAF8047545.1 | RLK | Other-RLK |
| <i>Sinapis alba</i> | KAF8047590.1 | RLK | Other-RLK |
| <i>Sinapis alba</i> | KAF8047594.1 | RLK | Other-RLK |
| <i>Sinapis alba</i> | KAF8047650.1 | RLK | LRR       |
| <i>Sinapis alba</i> | KAF8047699.1 | RLK | LRR       |
| <i>Sinapis alba</i> | KAF8047710.1 | RLK | Other-RLK |
| <i>Sinapis alba</i> | KAF8047997.1 | RLK | Other-RLK |
| <i>Sinapis alba</i> | KAF8047998.1 | RLK | Other-RLK |
| <i>Sinapis alba</i> | KAF8048027.1 | RLK | LRR       |
| <i>Sinapis alba</i> | KAF8048057.1 | RLK | LRR       |
| <i>Sinapis alba</i> | KAF8048129.1 | RLK | Other-RLK |
| <i>Sinapis alba</i> | KAF8048194.1 | RLK | LRR       |
| <i>Sinapis alba</i> | KAF8048275.1 | RLK | Other-RLK |
| <i>Sinapis alba</i> | KAF8048434.1 | RLK | LRR       |
| <i>Sinapis alba</i> | KAF8048439.1 | RLK | LRR       |
| <i>Sinapis alba</i> | KAF8048467.1 | RLK | Other-RLK |
| <i>Sinapis alba</i> | KAF8048816.1 | RLK | Other-RLK |
| <i>Sinapis alba</i> | KAF8049075.1 | RLK | LRR       |
| <i>Sinapis alba</i> | KAF8049083.1 | RLK | LRR       |
| <i>Sinapis alba</i> | KAF8049134.1 | RLK | LRR       |
| <i>Sinapis alba</i> | KAF8049135.1 | RLK | LRR       |
| <i>Sinapis alba</i> | KAF8049145.1 | RLK | LRR       |
| <i>Sinapis alba</i> | KAF8049152.1 | RLK | Other-RLK |
| <i>Sinapis alba</i> | KAF8049180.1 | RLK | LRR       |
| <i>Sinapis alba</i> | KAF8049374.1 | RLK | LRR       |
| <i>Sinapis alba</i> | KAF8049426.1 | RLK | LRR       |
| <i>Sinapis alba</i> | KAF8049604.1 | RLK | Other-RLK |
| <i>Sinapis alba</i> | KAF8049745.1 | RLK | Other-RLK |
| <i>Sinapis alba</i> | KAF8049847.1 | RLK | LRR       |
| <i>Sinapis alba</i> | KAF8049912.1 | RLK | Other-RLK |
| <i>Sinapis alba</i> | KAF8049913.1 | RLK | Other-RLK |
| <i>Sinapis alba</i> | KAF8049920.1 | RLK | LRR       |
| <i>Sinapis alba</i> | KAF8049936.1 | RLK | LRR       |
| <i>Sinapis alba</i> | KAF8050044.1 | RLK | LRR       |
| <i>Sinapis alba</i> | KAF8050072.1 | RLK | Other-RLK |
| <i>Sinapis alba</i> | KAF8050073.1 | RLK | Other-RLK |
| <i>Sinapis alba</i> | KAF8050102.1 | RLK | Other-RLK |
| <i>Sinapis alba</i> | KAF8050103.1 | RLK | LRR       |
| <i>Sinapis alba</i> | KAF8050104.1 | RLK | LRR       |
| <i>Sinapis alba</i> | KAF8050156.1 | RLK | LRR       |
| <i>Sinapis alba</i> | KAF8050182.1 | RLK | Other-RLK |
| <i>Sinapis alba</i> | KAF8050199.1 | RLK | LRR       |
| <i>Sinapis alba</i> | KAF8050207.1 | RLK | LRR       |
| <i>Sinapis alba</i> | KAF8050222.1 | RLK | Other-RLK |
| <i>Sinapis alba</i> | KAF8050228.1 | RLK | LRR       |
| <i>Sinapis alba</i> | KAF8050229.1 | RLK | LRR       |

|                     |              |     |           |
|---------------------|--------------|-----|-----------|
| <i>Sinapis alba</i> | KAF8050270.1 | RLK | LRR       |
| <i>Sinapis alba</i> | KAF8050319.1 | RLK | LRR       |
| <i>Sinapis alba</i> | KAF8050373.1 | RLK | Other-RLK |
| <i>Sinapis alba</i> | KAF8050383.1 | RLK | Other-RLK |
| <i>Sinapis alba</i> | KAF8050435.1 | RLK | Other-RLK |
| <i>Sinapis alba</i> | KAF8050490.1 | RLK | LRR       |
| <i>Sinapis alba</i> | KAF8050599.1 | RLK | LRR       |
| <i>Sinapis alba</i> | KAF8050616.1 | RLK | LRR       |
| <i>Sinapis alba</i> | KAF8050898.1 | RLK | LRR       |
| <i>Sinapis alba</i> | KAF8050994.1 | RLK | Other-RLK |
| <i>Sinapis alba</i> | KAF8051032.1 | RLK | LRR       |
| <i>Sinapis alba</i> | KAF8051069.1 | RLK | Other-RLK |
| <i>Sinapis alba</i> | KAF8051075.1 | RLK | Other-RLK |
| <i>Sinapis alba</i> | KAF8051096.1 | RLK | LRR       |
| <i>Sinapis alba</i> | KAF8051136.1 | RLK | Other-RLK |
| <i>Sinapis alba</i> | KAF8051159.1 | RLK | Other-RLK |
| <i>Sinapis alba</i> | KAF8051172.1 | RLK | Other-RLK |
| <i>Sinapis alba</i> | KAF8051231.1 | RLK | Other-RLK |
| <i>Sinapis alba</i> | KAF8051232.1 | RLK | Other-RLK |
| <i>Sinapis alba</i> | KAF8051299.1 | RLK | Other-RLK |
| <i>Sinapis alba</i> | KAF8051416.1 | RLK | LRR       |
| <i>Sinapis alba</i> | KAF8051453.1 | RLK | Other-RLK |
| <i>Sinapis alba</i> | KAF8051478.1 | RLK | LRR       |
| <i>Sinapis alba</i> | KAF8051686.1 | RLK | Other-RLK |
| <i>Sinapis alba</i> | KAF8051705.1 | RLK | Other-RLK |
| <i>Sinapis alba</i> | KAF8051827.1 | RLK | Other-RLK |
| <i>Sinapis alba</i> | KAF8051828.1 | RLK | Other-RLK |
| <i>Sinapis alba</i> | KAF8051848.1 | RLK | Other-RLK |
| <i>Sinapis alba</i> | KAF8051911.1 | RLK | Other-RLK |
| <i>Sinapis alba</i> | KAF8052084.1 | RLK | Other-RLK |
| <i>Sinapis alba</i> | KAF8052214.1 | RLK | Other-RLK |
| <i>Sinapis alba</i> | KAF8052271.1 | RLK | Other-RLK |
| <i>Sinapis alba</i> | KAF8052272.1 | RLK | Other-RLK |
| <i>Sinapis alba</i> | KAF8052368.1 | RLK | LRR       |
| <i>Sinapis alba</i> | KAF8052393.1 | RLK | Other-RLK |
| <i>Sinapis alba</i> | KAF8052477.1 | RLK | LRR       |
| <i>Sinapis alba</i> | KAF8052546.1 | RLK | Other-RLK |
| <i>Sinapis alba</i> | KAF8052555.1 | RLK | LRR       |
| <i>Sinapis alba</i> | KAF8052678.1 | RLK | Other-RLK |
| <i>Sinapis alba</i> | KAF8052744.1 | RLK | Other-RLK |
| <i>Sinapis alba</i> | KAF8052749.1 | RLK | LRR       |
| <i>Sinapis alba</i> | KAF8052812.1 | RLK | Other-RLK |
| <i>Sinapis alba</i> | KAF8052813.1 | RLK | Other-RLK |
| <i>Sinapis alba</i> | KAF8052845.1 | RLK | LRR       |
| <i>Sinapis alba</i> | KAF8052887.1 | RLK | Other-RLK |
| <i>Sinapis alba</i> | KAF8052888.1 | RLK | Other-RLK |
| <i>Sinapis alba</i> | KAF8052944.1 | RLK | LRR       |
| <i>Sinapis alba</i> | KAF8053345.1 | RLK | Other-RLK |
| <i>Sinapis alba</i> | KAF8053368.1 | RLK | LRR       |
| <i>Sinapis alba</i> | KAF8053444.1 | RLK | Other-RLK |
| <i>Sinapis alba</i> | KAF8053511.1 | RLK | Other-RLK |
| <i>Sinapis alba</i> | KAF8053513.1 | RLK | LRR       |
| <i>Sinapis alba</i> | KAF8053557.1 | RLK | Other-RLK |
| <i>Sinapis alba</i> | KAF8053680.1 | RLK | LRR       |
| <i>Sinapis alba</i> | KAF8053693.1 | RLK | LRR       |
| <i>Sinapis alba</i> | KAF8053832.1 | RLK | Other-RLK |
| <i>Sinapis alba</i> | KAF8053910.1 | RLK | Other-RLK |
| <i>Sinapis alba</i> | KAF8054040.1 | RLK | LRR       |
| <i>Sinapis alba</i> | KAF8054820.1 | RLK | Other-RLK |
| <i>Sinapis alba</i> | KAF8054821.1 | RLK | Other-RLK |
| <i>Sinapis alba</i> | KAF8055071.1 | RLK | Other-RLK |
| <i>Sinapis alba</i> | KAF8055134.1 | RLK | Other-RLK |

|                     |              |     |           |
|---------------------|--------------|-----|-----------|
| <i>Sinapis alba</i> | KAF8055259.1 | RLK | LRR       |
| <i>Sinapis alba</i> | KAF8055713.1 | RLK | Other-RLK |
| <i>Sinapis alba</i> | KAF8055715.1 | RLK | Other-RLK |
| <i>Sinapis alba</i> | KAF8055982.1 | RLK | Other-RLK |
| <i>Sinapis alba</i> | KAF8056422.1 | RLK | LRR       |
| <i>Sinapis alba</i> | KAF8057226.1 | RLK | Other-RLK |
| <i>Sinapis alba</i> | KAF8057305.1 | RLK | Other-RLK |
| <i>Sinapis alba</i> | KAF8057339.1 | RLK | LRR       |
| <i>Sinapis alba</i> | KAF8059007.1 | RLK | LRR       |
| <i>Sinapis alba</i> | KAF8059553.1 | RLK | LRR       |
| <i>Sinapis alba</i> | KAF8059953.1 | RLK | LRR       |
| <i>Sinapis alba</i> | KAF8060397.1 | RLK | LRR       |
| <i>Sinapis alba</i> | KAF8060448.1 | RLK | Other-RLK |
| <i>Sinapis alba</i> | KAF8061186.1 | RLK | LRR       |
| <i>Sinapis alba</i> | KAF8061219.1 | RLK | Other-RLK |
| <i>Sinapis alba</i> | KAF8061267.1 | RLK | Other-RLK |
| <i>Sinapis alba</i> | KAF8062596.1 | RLK | Other-RLK |
| <i>Sinapis alba</i> | KAF8062597.1 | RLK | Other-RLK |
| <i>Sinapis alba</i> | KAF8062600.1 | RLK | Other-RLK |
| <i>Sinapis alba</i> | KAF8062607.1 | RLK | Other-RLK |
| <i>Sinapis alba</i> | KAF8062871.1 | RLK | LRR       |
| <i>Sinapis alba</i> | KAF8063122.1 | RLK | Other-RLK |
| <i>Sinapis alba</i> | KAF8064809.1 | RLK | Other-RLK |
| <i>Sinapis alba</i> | KAF8065678.1 | RLK | LRR       |
| <i>Sinapis alba</i> | KAF8066148.1 | RLK | LRR       |
| <i>Sinapis alba</i> | KAF8068469.1 | RLK | LRR       |
| <i>Sinapis alba</i> | KAF8068506.1 | RLK | Other-RLK |
| <i>Sinapis alba</i> | KAF8069360.1 | RLK | Other-RLK |
| <i>Sinapis alba</i> | KAF8069776.1 | RLK | LRR       |
| <i>Sinapis alba</i> | KAF8069777.1 | RLK | LRR       |
| <i>Sinapis alba</i> | KAF8073271.1 | RLK | LRR       |
| <i>Sinapis alba</i> | KAF8073295.1 | RLK | Other-RLK |
| <i>Sinapis alba</i> | KAF8074393.1 | RLK | LRR       |
| <i>Sinapis alba</i> | KAF8075444.1 | RLK | Other-RLK |
| <i>Sinapis alba</i> | KAF8075480.1 | RLK | LRR       |
| <i>Sinapis alba</i> | KAF8075481.1 | RLK | LRR       |
| <i>Sinapis alba</i> | KAF8075515.1 | RLK | LRR       |
| <i>Sinapis alba</i> | KAF8075516.1 | RLK | LRR       |
| <i>Sinapis alba</i> | KAF8075517.1 | RLK | LRR       |
| <i>Sinapis alba</i> | KAF8075518.1 | RLK | LRR       |
| <i>Sinapis alba</i> | KAF8075519.1 | RLK | LRR       |
| <i>Sinapis alba</i> | KAF8075543.1 | RLK | Other-RLK |
| <i>Sinapis alba</i> | KAF8075650.1 | RLK | Other-RLK |
| <i>Sinapis alba</i> | KAF8077040.1 | RLK | Other-RLK |
| <i>Sinapis alba</i> | KAF8077064.1 | RLK | LRR       |
| <i>Sinapis alba</i> | KAF8077080.1 | RLK | LRR       |
| <i>Sinapis alba</i> | KAF8077090.1 | RLK | Other-RLK |
| <i>Sinapis alba</i> | KAF8077174.1 | RLK | Other-RLK |
| <i>Sinapis alba</i> | KAF8077189.1 | RLK | Other-RLK |
| <i>Sinapis alba</i> | KAF8077211.1 | RLK | Other-RLK |
| <i>Sinapis alba</i> | KAF8077212.1 | RLK | Other-RLK |
| <i>Sinapis alba</i> | KAF8077213.1 | RLK | Other-RLK |
| <i>Sinapis alba</i> | KAF8077216.1 | RLK | Other-RLK |
| <i>Sinapis alba</i> | KAF8077347.1 | RLK | Other-RLK |
| <i>Sinapis alba</i> | KAF8077372.1 | RLK | Other-RLK |
| <i>Sinapis alba</i> | KAF8077543.1 | RLK | Other-RLK |
| <i>Sinapis alba</i> | KAF8079542.1 | RLK | LRR       |
| <i>Sinapis alba</i> | KAF8079950.1 | RLK | Other-RLK |
| <i>Sinapis alba</i> | KAF8080065.1 | RLK | LRR       |
| <i>Sinapis alba</i> | KAF8080098.1 | RLK | Other-RLK |
| <i>Sinapis alba</i> | KAF8080140.1 | RLK | LRR       |
| <i>Sinapis alba</i> | KAF8080151.1 | RLK | LRR       |

|                     |              |     |           |
|---------------------|--------------|-----|-----------|
| <i>Sinapis alba</i> | KAF8080165.1 | RLK | Other-RLK |
| <i>Sinapis alba</i> | KAF8080188.1 | RLK | Other-RLK |
| <i>Sinapis alba</i> | KAF8080192.1 | RLK | Other-RLK |
| <i>Sinapis alba</i> | KAF8080195.1 | RLK | Other-RLK |
| <i>Sinapis alba</i> | KAF8080206.1 | RLK | Other-RLK |
| <i>Sinapis alba</i> | KAF8080264.1 | RLK | Other-RLK |
| <i>Sinapis alba</i> | KAF8080361.1 | RLK | LRR       |
| <i>Sinapis alba</i> | KAF8080368.1 | RLK | Other-RLK |
| <i>Sinapis alba</i> | KAF8080475.1 | RLK | LRR       |
| <i>Sinapis alba</i> | KAF8080476.1 | RLK | LRR       |
| <i>Sinapis alba</i> | KAF8080588.1 | RLK | Other-RLK |
| <i>Sinapis alba</i> | KAF8080603.1 | RLK | Other-RLK |
| <i>Sinapis alba</i> | KAF8080624.1 | RLK | LRR       |
| <i>Sinapis alba</i> | KAF8080642.1 | RLK | Other-RLK |
| <i>Sinapis alba</i> | KAF8080655.1 | RLK | LRR       |
| <i>Sinapis alba</i> | KAF8080741.1 | RLK | Other-RLK |
| <i>Sinapis alba</i> | KAF8080815.1 | RLK | Other-RLK |
| <i>Sinapis alba</i> | KAF8080816.1 | RLK | Other-RLK |
| <i>Sinapis alba</i> | KAF8080859.1 | RLK | LRR       |
| <i>Sinapis alba</i> | KAF8080989.1 | RLK | LRR       |
| <i>Sinapis alba</i> | KAF8081036.1 | RLK | Other-RLK |
| <i>Sinapis alba</i> | KAF8081096.1 | RLK | Other-RLK |
| <i>Sinapis alba</i> | KAF8081155.1 | RLK | Other-RLK |
| <i>Sinapis alba</i> | KAF8081344.1 | RLK | Other-RLK |
| <i>Sinapis alba</i> | KAF8081345.1 | RLK | Other-RLK |
| <i>Sinapis alba</i> | KAF8081493.1 | RLK | Other-RLK |
| <i>Sinapis alba</i> | KAF8081621.1 | RLK | LRR       |
| <i>Sinapis alba</i> | KAF8081624.1 | RLK | Other-RLK |
| <i>Sinapis alba</i> | KAF8081625.1 | RLK | LRR       |
| <i>Sinapis alba</i> | KAF8081629.1 | RLK | LRR       |
| <i>Sinapis alba</i> | KAF8081804.1 | RLK | Lysm      |
| <i>Sinapis alba</i> | KAF8081855.1 | RLK | LRR       |
| <i>Sinapis alba</i> | KAF8081880.1 | RLK | Other-RLK |
| <i>Sinapis alba</i> | KAF8081949.1 | RLK | Other-RLK |
| <i>Sinapis alba</i> | KAF8081958.1 | RLK | Other-RLK |
| <i>Sinapis alba</i> | KAF8081966.1 | RLK | Other-RLK |
| <i>Sinapis alba</i> | KAF8082095.1 | RLK | LRR       |
| <i>Sinapis alba</i> | KAF8082408.1 | RLK | LRR       |
| <i>Sinapis alba</i> | KAF8082439.1 | RLK | Other-RLK |
| <i>Sinapis alba</i> | KAF8082440.1 | RLK | Other-RLK |
| <i>Sinapis alba</i> | KAF8082441.1 | RLK | Other-RLK |
| <i>Sinapis alba</i> | KAF8082442.1 | RLK | Other-RLK |
| <i>Sinapis alba</i> | KAF8082444.1 | RLK | Other-RLK |
| <i>Sinapis alba</i> | KAF8082445.1 | RLK | Other-RLK |
| <i>Sinapis alba</i> | KAF8082446.1 | RLK | Other-RLK |
| <i>Sinapis alba</i> | KAF8082447.1 | RLK | Other-RLK |
| <i>Sinapis alba</i> | KAF8082448.1 | RLK | Other-RLK |
| <i>Sinapis alba</i> | KAF8082449.1 | RLK | Other-RLK |
| <i>Sinapis alba</i> | KAF8082542.1 | RLK | Other-RLK |
| <i>Sinapis alba</i> | KAF8082673.1 | RLK | LRR       |
| <i>Sinapis alba</i> | KAF8082692.1 | RLK | Other-RLK |
| <i>Sinapis alba</i> | KAF8082693.1 | RLK | Other-RLK |
| <i>Sinapis alba</i> | KAF8082703.1 | RLK | LRR       |
| <i>Sinapis alba</i> | KAF8082704.1 | RLK | LRR       |
| <i>Sinapis alba</i> | KAF8082705.1 | RLK | LRR       |
| <i>Sinapis alba</i> | KAF8082706.1 | RLK | LRR       |
| <i>Sinapis alba</i> | KAF8082707.1 | RLK | LRR       |
| <i>Sinapis alba</i> | KAF8082723.1 | RLK | LRR       |
| <i>Sinapis alba</i> | KAF8082753.1 | RLK | Other-RLK |
| <i>Sinapis alba</i> | KAF8082754.1 | RLK | Other-RLK |
| <i>Sinapis alba</i> | KAF8082755.1 | RLK | Other-RLK |
| <i>Sinapis alba</i> | KAF8082797.1 | RLK | Other-RLK |



|                     |              |     |           |
|---------------------|--------------|-----|-----------|
| <i>Sinapis alba</i> | KAF8082914.1 | RLK | LRR       |
| <i>Sinapis alba</i> | KAF8083036.1 | RLK | LRR       |
| <i>Sinapis alba</i> | KAF8083132.1 | RLK | LRR       |
| <i>Sinapis alba</i> | KAF8083319.1 | RLK | Other-RLK |
| <i>Sinapis alba</i> | KAF8083382.1 | RLK | Other-RLK |
| <i>Sinapis alba</i> | KAF8083387.1 | RLK | Other-RLK |
| <i>Sinapis alba</i> | KAF8083388.1 | RLK | Other-RLK |
| <i>Sinapis alba</i> | KAF8083389.1 | RLK | Other-RLK |
| <i>Sinapis alba</i> | KAF8083408.1 | RLK | Lysm      |
| <i>Sinapis alba</i> | KAF8083409.1 | RLK | LRR       |
| <i>Sinapis alba</i> | KAF8083411.1 | RLK | LRR       |
| <i>Sinapis alba</i> | KAF8083413.1 | RLK | Other-RLK |
| <i>Sinapis alba</i> | KAF8083478.1 | RLK | LRR       |
| <i>Sinapis alba</i> | KAF8083492.1 | RLK | Lysm      |
| <i>Sinapis alba</i> | KAF8083604.1 | RLK | Other-RLK |
| <i>Sinapis alba</i> | KAF8083632.1 | RLK | Other-RLK |
| <i>Sinapis alba</i> | KAF8083637.1 | RLK | Other-RLK |
| <i>Sinapis alba</i> | KAF8083639.1 | RLK | LRR       |
| <i>Sinapis alba</i> | KAF8083760.1 | RLK | Other-RLK |
| <i>Sinapis alba</i> | KAF8083788.1 | RLK | LRR       |
| <i>Sinapis alba</i> | KAF8083789.1 | RLK | LRR       |
| <i>Sinapis alba</i> | KAF8083790.1 | RLK | LRR       |
| <i>Sinapis alba</i> | KAF8084036.1 | RLK | Other-RLK |
| <i>Sinapis alba</i> | KAF8084052.1 | RLK | LRR       |
| <i>Sinapis alba</i> | KAF8084053.1 | RLK | LRR       |
| <i>Sinapis alba</i> | KAF8084054.1 | RLK | LRR       |
| <i>Sinapis alba</i> | KAF8084113.1 | RLK | Other-RLK |
| <i>Sinapis alba</i> | KAF8084133.1 | RLK | Other-RLK |
| <i>Sinapis alba</i> | KAF8084271.1 | RLK | Other-RLK |
| <i>Sinapis alba</i> | KAF8084443.1 | RLK | LRR       |
| <i>Sinapis alba</i> | KAF8084514.1 | RLK | Other-RLK |
| <i>Sinapis alba</i> | KAF8084594.1 | RLK | Other-RLK |
| <i>Sinapis alba</i> | KAF8084787.1 | RLK | LRR       |
| <i>Sinapis alba</i> | KAF8084859.1 | RLK | Other-RLK |
| <i>Sinapis alba</i> | KAF8085023.1 | RLK | Other-RLK |
| <i>Sinapis alba</i> | KAF8085193.1 | RLK | Other-RLK |
| <i>Sinapis alba</i> | KAF8085212.1 | RLK | Other-RLK |
| <i>Sinapis alba</i> | KAF8085491.1 | RLK | Other-RLK |
| <i>Sinapis alba</i> | KAF8085492.1 | RLK | Other-RLK |
| <i>Sinapis alba</i> | KAF8085508.1 | RLK | Other-RLK |
| <i>Sinapis alba</i> | KAF8085672.1 | RLK | Other-RLK |
| <i>Sinapis alba</i> | KAF8085676.1 | RLK | LRR       |
| <i>Sinapis alba</i> | KAF8085722.1 | RLK | Other-RLK |
| <i>Sinapis alba</i> | KAF8085741.1 | RLK | Other-RLK |
| <i>Sinapis alba</i> | KAF8085807.1 | RLK | Other-RLK |
| <i>Sinapis alba</i> | KAF8085838.1 | RLK | Other-RLK |
| <i>Sinapis alba</i> | KAF8085879.1 | RLK | Other-RLK |
| <i>Sinapis alba</i> | KAF8085881.1 | RLK | Other-RLK |
| <i>Sinapis alba</i> | KAF8085882.1 | RLK | Other-RLK |
| <i>Sinapis alba</i> | KAF8085883.1 | RLK | Other-RLK |
| <i>Sinapis alba</i> | KAF8085884.1 | RLK | Other-RLK |
| <i>Sinapis alba</i> | KAF8085885.1 | RLK | Other-RLK |
| <i>Sinapis alba</i> | KAF8085886.1 | RLK | Other-RLK |
| <i>Sinapis alba</i> | KAF8085887.1 | RLK | Other-RLK |
| <i>Sinapis alba</i> | KAF8085888.1 | RLK | Other-RLK |
| <i>Sinapis alba</i> | KAF8086055.1 | RLK | Other-RLK |
| <i>Sinapis alba</i> | KAF8086116.1 | RLK | Other-RLK |
| <i>Sinapis alba</i> | KAF8086117.1 | RLK | Other-RLK |
| <i>Sinapis alba</i> | KAF8086163.1 | RLK | LRR       |
| <i>Sinapis alba</i> | KAF8086233.1 | RLK | LRR       |
| <i>Sinapis alba</i> | KAF8086238.1 | RLK | LRR       |
| <i>Sinapis alba</i> | KAF8086311.1 | RLK | LRR       |

|                     |              |     |           |
|---------------------|--------------|-----|-----------|
| <i>Sinapis alba</i> | KAF8086456.1 | RLK | Other-RLK |
| <i>Sinapis alba</i> | KAF8086457.1 | RLK | Other-RLK |
| <i>Sinapis alba</i> | KAF8086459.1 | RLK | Other-RLK |
| <i>Sinapis alba</i> | KAF8086507.1 | RLK | Other-RLK |
| <i>Sinapis alba</i> | KAF8086538.1 | RLK | Other-RLK |
| <i>Sinapis alba</i> | KAF8086736.1 | RLK | LRR       |
| <i>Sinapis alba</i> | KAF8086780.1 | RLK | Other-RLK |
| <i>Sinapis alba</i> | KAF8086781.1 | RLK | Other-RLK |
| <i>Sinapis alba</i> | KAF8086784.1 | RLK | Other-RLK |
| <i>Sinapis alba</i> | KAF8086785.1 | RLK | Other-RLK |
| <i>Sinapis alba</i> | KAF8086798.1 | RLK | Other-RLK |
| <i>Sinapis alba</i> | KAF8086799.1 | RLK | Other-RLK |
| <i>Sinapis alba</i> | KAF8086800.1 | RLK | Other-RLK |
| <i>Sinapis alba</i> | KAF8086801.1 | RLK | Other-RLK |
| <i>Sinapis alba</i> | KAF8086862.1 | RLK | Other-RLK |
| <i>Sinapis alba</i> | KAF8086868.1 | RLK | Other-RLK |
| <i>Sinapis alba</i> | KAF8086968.1 | RLK | LRR       |
| <i>Sinapis alba</i> | KAF8087059.1 | RLK | Other-RLK |
| <i>Sinapis alba</i> | KAF8087067.1 | RLK | Other-RLK |
| <i>Sinapis alba</i> | KAF8087215.1 | RLK | LRR       |
| <i>Sinapis alba</i> | KAF8087242.1 | RLK | LRR       |
| <i>Sinapis alba</i> | KAF8087245.1 | RLK | Other-RLK |
| <i>Sinapis alba</i> | KAF8087246.1 | RLK | Other-RLK |
| <i>Sinapis alba</i> | KAF8087314.1 | RLK | LRR       |
| <i>Sinapis alba</i> | KAF8087394.1 | RLK | LRR       |
| <i>Sinapis alba</i> | KAF8087395.1 | RLK | LRR       |
| <i>Sinapis alba</i> | KAF8087571.1 | RLK | Other-RLK |
| <i>Sinapis alba</i> | KAF8087671.1 | RLK | LRR       |
| <i>Sinapis alba</i> | KAF8087893.1 | RLK | Other-RLK |
| <i>Sinapis alba</i> | KAF8087904.1 | RLK | Other-RLK |
| <i>Sinapis alba</i> | KAF8087905.1 | RLK | Other-RLK |
| <i>Sinapis alba</i> | KAF8087986.1 | RLK | Other-RLK |
| <i>Sinapis alba</i> | KAF8088030.1 | RLK | LRR       |
| <i>Sinapis alba</i> | KAF8088056.1 | RLK | Other-RLK |
| <i>Sinapis alba</i> | KAF8088085.1 | RLK | Other-RLK |
| <i>Sinapis alba</i> | KAF8088157.1 | RLK | Other-RLK |
| <i>Sinapis alba</i> | KAF8088256.1 | RLK | Other-RLK |
| <i>Sinapis alba</i> | KAF8088282.1 | RLK | Other-RLK |
| <i>Sinapis alba</i> | KAF8088326.1 | RLK | Other-RLK |
| <i>Sinapis alba</i> | KAF8088327.1 | RLK | Other-RLK |
| <i>Sinapis alba</i> | KAF8088382.1 | RLK | LRR       |
| <i>Sinapis alba</i> | KAF8088435.1 | RLK | Other-RLK |
| <i>Sinapis alba</i> | KAF8088436.1 | RLK | Other-RLK |
| <i>Sinapis alba</i> | KAF8088437.1 | RLK | Other-RLK |
| <i>Sinapis alba</i> | KAF8088804.1 | RLK | LRR       |
| <i>Sinapis alba</i> | KAF8088822.1 | RLK | Other-RLK |
| <i>Sinapis alba</i> | KAF8088834.1 | RLK | Other-RLK |
| <i>Sinapis alba</i> | KAF8089027.1 | RLK | Other-RLK |
| <i>Sinapis alba</i> | KAF8089073.1 | RLK | LRR       |
| <i>Sinapis alba</i> | KAF8089095.1 | RLK | LRR       |
| <i>Sinapis alba</i> | KAF8089097.1 | RLK | LRR       |
| <i>Sinapis alba</i> | KAF8089125.1 | RLK | LRR       |
| <i>Sinapis alba</i> | KAF8089127.1 | RLK | LRR       |
| <i>Sinapis alba</i> | KAF8089128.1 | RLK | LRR       |
| <i>Sinapis alba</i> | KAF8089129.1 | RLK | LRR       |
| <i>Sinapis alba</i> | KAF8089131.1 | RLK | LRR       |
| <i>Sinapis alba</i> | KAF8089132.1 | RLK | LRR       |
| <i>Sinapis alba</i> | KAF8089134.1 | RLK | LRR       |
| <i>Sinapis alba</i> | KAF8089271.1 | RLK | Other-RLK |
| <i>Sinapis alba</i> | KAF8089274.1 | RLK | LRR       |
| <i>Sinapis alba</i> | KAF8089316.1 | RLK | LRR       |
| <i>Sinapis alba</i> | KAF8089369.1 | RLK | LRR       |

|                     |              |     |           |
|---------------------|--------------|-----|-----------|
| <i>Sinapis alba</i> | KAF8089456.1 | RLK | Other-RLK |
| <i>Sinapis alba</i> | KAF8089493.1 | RLK | LRR       |
| <i>Sinapis alba</i> | KAF8089794.1 | RLK | LRR       |
| <i>Sinapis alba</i> | KAF8089814.1 | RLK | Other-RLK |
| <i>Sinapis alba</i> | KAF8089815.1 | RLK | Other-RLK |
| <i>Sinapis alba</i> | KAF8089890.1 | RLK | LRR       |
| <i>Sinapis alba</i> | KAF8089891.1 | RLK | Other-RLK |
| <i>Sinapis alba</i> | KAF8089950.1 | RLK | Other-RLK |
| <i>Sinapis alba</i> | KAF8089979.1 | RLK | Other-RLK |
| <i>Sinapis alba</i> | KAF8089986.1 | RLK | Other-RLK |
| <i>Sinapis alba</i> | KAF8090139.1 | RLK | Other-RLK |
| <i>Sinapis alba</i> | KAF8090261.1 | RLK | LRR       |
| <i>Sinapis alba</i> | KAF8090271.1 | RLK | LRR       |
| <i>Sinapis alba</i> | KAF8090323.1 | RLK | Other-RLK |
| <i>Sinapis alba</i> | KAF8090414.1 | RLK | LRR       |
| <i>Sinapis alba</i> | KAF8090446.1 | RLK | Other-RLK |
| <i>Sinapis alba</i> | KAF8090522.1 | RLK | Other-RLK |
| <i>Sinapis alba</i> | KAF8090601.1 | RLK | LRR       |
| <i>Sinapis alba</i> | KAF8090664.1 | RLK | Other-RLK |
| <i>Sinapis alba</i> | KAF8090675.1 | RLK | Other-RLK |
| <i>Sinapis alba</i> | KAF8090676.1 | RLK | Other-RLK |
| <i>Sinapis alba</i> | KAF8090678.1 | RLK | Other-RLK |
| <i>Sinapis alba</i> | KAF8090679.1 | RLK | Other-RLK |
| <i>Sinapis alba</i> | KAF8090680.1 | RLK | Other-RLK |
| <i>Sinapis alba</i> | KAF8090687.1 | RLK | Other-RLK |
| <i>Sinapis alba</i> | KAF8090688.1 | RLK | Other-RLK |
| <i>Sinapis alba</i> | KAF8090697.1 | RLK | Other-RLK |
| <i>Sinapis alba</i> | KAF8090776.1 | RLK | LRR       |
| <i>Sinapis alba</i> | KAF8090841.1 | RLK | Other-RLK |
| <i>Sinapis alba</i> | KAF8090843.1 | RLK | Other-RLK |
| <i>Sinapis alba</i> | KAF8090927.1 | RLK | LRR       |
| <i>Sinapis alba</i> | KAF8091178.1 | RLK | Other-RLK |
| <i>Sinapis alba</i> | KAF8091180.1 | RLK | Other-RLK |
| <i>Sinapis alba</i> | KAF8091190.1 | RLK | LRR       |
| <i>Sinapis alba</i> | KAF8091352.1 | RLK | Other-RLK |
| <i>Sinapis alba</i> | KAF8091387.1 | RLK | LRR       |
| <i>Sinapis alba</i> | KAF8091437.1 | RLK | Other-RLK |
| <i>Sinapis alba</i> | KAF8091438.1 | RLK | Other-RLK |
| <i>Sinapis alba</i> | KAF8091446.1 | RLK | Other-RLK |
| <i>Sinapis alba</i> | KAF8091612.1 | RLK | Other-RLK |
| <i>Sinapis alba</i> | KAF8091613.1 | RLK | Other-RLK |
| <i>Sinapis alba</i> | KAF8091614.1 | RLK | Other-RLK |
| <i>Sinapis alba</i> | KAF8091616.1 | RLK | Other-RLK |
| <i>Sinapis alba</i> | KAF8091617.1 | RLK | Other-RLK |
| <i>Sinapis alba</i> | KAF8091622.1 | RLK | LRR       |
| <i>Sinapis alba</i> | KAF8091723.1 | RLK | Other-RLK |
| <i>Sinapis alba</i> | KAF8091788.1 | RLK | Other-RLK |
| <i>Sinapis alba</i> | KAF8091912.1 | RLK | LRR       |
| <i>Sinapis alba</i> | KAF8091913.1 | RLK | LRR       |
| <i>Sinapis alba</i> | KAF8091927.1 | RLK | LRR       |
| <i>Sinapis alba</i> | KAF8091942.1 | RLK | Other-RLK |
| <i>Sinapis alba</i> | KAF8091982.1 | RLK | Other-RLK |
| <i>Sinapis alba</i> | KAF8091992.1 | RLK | Other-RLK |
| <i>Sinapis alba</i> | KAF8091997.1 | RLK | LRR       |
| <i>Sinapis alba</i> | KAF8092163.1 | RLK | Other-RLK |
| <i>Sinapis alba</i> | KAF8092175.1 | RLK | LRR       |
| <i>Sinapis alba</i> | KAF8092265.1 | RLK | LRR       |
| <i>Sinapis alba</i> | KAF8092471.1 | RLK | LRR       |
| <i>Sinapis alba</i> | KAF8092533.1 | RLK | Other-RLK |
| <i>Sinapis alba</i> | KAF8092717.1 | RLK | Lysm      |
| <i>Sinapis alba</i> | KAF8092753.1 | RLK | LRR       |
| <i>Sinapis alba</i> | KAF8092776.1 | RLK | LRR       |

|                     |              |     |           |
|---------------------|--------------|-----|-----------|
| <i>Sinapis alba</i> | KAF8092801.1 | RLK | Other-RLK |
| <i>Sinapis alba</i> | KAF8092822.1 | RLK | Other-RLK |
| <i>Sinapis alba</i> | KAF8092883.1 | RLK | Other-RLK |
| <i>Sinapis alba</i> | KAF8092948.1 | RLK | Other-RLK |
| <i>Sinapis alba</i> | KAF8093016.1 | RLK | Other-RLK |
| <i>Sinapis alba</i> | KAF8093019.1 | RLK | Other-RLK |
| <i>Sinapis alba</i> | KAF8093020.1 | RLK | Other-RLK |
| <i>Sinapis alba</i> | KAF8093021.1 | RLK | Other-RLK |
| <i>Sinapis alba</i> | KAF8093022.1 | RLK | Other-RLK |
| <i>Sinapis alba</i> | KAF8093023.1 | RLK | Other-RLK |
| <i>Sinapis alba</i> | KAF8093024.1 | RLK | Other-RLK |
| <i>Sinapis alba</i> | KAF8093091.1 | RLK | Other-RLK |
| <i>Sinapis alba</i> | KAF8093132.1 | RLK | Other-RLK |
| <i>Sinapis alba</i> | KAF8093164.1 | RLK | LRR       |
| <i>Sinapis alba</i> | KAF8093170.1 | RLK | LRR       |
| <i>Sinapis alba</i> | KAF8093180.1 | RLK | Other-RLK |
| <i>Sinapis alba</i> | KAF8093324.1 | RLK | LRR       |
| <i>Sinapis alba</i> | KAF8093507.1 | RLK | Other-RLK |
| <i>Sinapis alba</i> | KAF8093549.1 | RLK | Other-RLK |
| <i>Sinapis alba</i> | KAF8093834.1 | RLK | LRR       |
| <i>Sinapis alba</i> | KAF8093842.1 | RLK | LRR       |
| <i>Sinapis alba</i> | KAF8093843.1 | RLK | LRR       |
| <i>Sinapis alba</i> | KAF8093891.1 | RLK | Other-RLK |
| <i>Sinapis alba</i> | KAF8093935.1 | RLK | LRR       |
| <i>Sinapis alba</i> | KAF8094022.1 | RLK | Other-RLK |
| <i>Sinapis alba</i> | KAF8094052.1 | RLK | LRR       |
| <i>Sinapis alba</i> | KAF8094086.1 | RLK | Other-RLK |
| <i>Sinapis alba</i> | KAF8094102.1 | RLK | LRR       |
| <i>Sinapis alba</i> | KAF8094127.1 | RLK | LRR       |
| <i>Sinapis alba</i> | KAF8094155.1 | RLK | LRR       |
| <i>Sinapis alba</i> | KAF8094156.1 | RLK | LRR       |
| <i>Sinapis alba</i> | KAF8094336.1 | RLK | Other-RLK |
| <i>Sinapis alba</i> | KAF8094497.1 | RLK | Other-RLK |
| <i>Sinapis alba</i> | KAF8094531.1 | RLK | Other-RLK |
| <i>Sinapis alba</i> | KAF8094532.1 | RLK | Other-RLK |
| <i>Sinapis alba</i> | KAF8094539.1 | RLK | Other-RLK |
| <i>Sinapis alba</i> | KAF8094584.1 | RLK | Other-RLK |
| <i>Sinapis alba</i> | KAF8094683.1 | RLK | LRR       |
| <i>Sinapis alba</i> | KAF8094729.1 | RLK | Other-RLK |
| <i>Sinapis alba</i> | KAF8094747.1 | RLK | LRR       |
| <i>Sinapis alba</i> | KAF8094768.1 | RLK | Other-RLK |
| <i>Sinapis alba</i> | KAF8094794.1 | RLK | LRR       |
| <i>Sinapis alba</i> | KAF8094795.1 | RLK | LRR       |
| <i>Sinapis alba</i> | KAF8094796.1 | RLK | LRR       |
| <i>Sinapis alba</i> | KAF8094797.1 | RLK | LRR       |
| <i>Sinapis alba</i> | KAF8094798.1 | RLK | LRR       |
| <i>Sinapis alba</i> | KAF8095064.1 | RLK | LRR       |
| <i>Sinapis alba</i> | KAF8095306.1 | RLK | Other-RLK |
| <i>Sinapis alba</i> | KAF8095362.1 | RLK | Other-RLK |
| <i>Sinapis alba</i> | KAF8095409.1 | RLK | LRR       |
| <i>Sinapis alba</i> | KAF8095467.1 | RLK | Other-RLK |
| <i>Sinapis alba</i> | KAF8095610.1 | RLK | LRR       |
| <i>Sinapis alba</i> | KAF8095624.1 | RLK | LRR       |
| <i>Sinapis alba</i> | KAF8095625.1 | RLK | LRR       |
| <i>Sinapis alba</i> | KAF8095626.1 | RLK | LRR       |
| <i>Sinapis alba</i> | KAF8095690.1 | RLK | LRR       |
| <i>Sinapis alba</i> | KAF8095731.1 | RLK | Other-RLK |
| <i>Sinapis alba</i> | KAF8095790.1 | RLK | Other-RLK |
| <i>Sinapis alba</i> | KAF8095791.1 | RLK | Other-RLK |
| <i>Sinapis alba</i> | KAF8095794.1 | RLK | Other-RLK |
| <i>Sinapis alba</i> | KAF8095859.1 | RLK | Other-RLK |
| <i>Sinapis alba</i> | KAF8095865.1 | RLK | LRR       |

|                     |              |     |           |
|---------------------|--------------|-----|-----------|
| <i>Sinapis alba</i> | KAF8095876.1 | RLK | Other-RLK |
| <i>Sinapis alba</i> | KAF8095877.1 | RLK | Other-RLK |
| <i>Sinapis alba</i> | KAF8095939.1 | RLK | Other-RLK |
| <i>Sinapis alba</i> | KAF8095940.1 | RLK | Other-RLK |
| <i>Sinapis alba</i> | KAF8095941.1 | RLK | Other-RLK |
| <i>Sinapis alba</i> | KAF8095942.1 | RLK | LRR       |
| <i>Sinapis alba</i> | KAF8095943.1 | RLK | Other-RLK |
| <i>Sinapis alba</i> | KAF8095948.1 | RLK | Other-RLK |
| <i>Sinapis alba</i> | KAF8095949.1 | RLK | Other-RLK |
| <i>Sinapis alba</i> | KAF8095950.1 | RLK | Other-RLK |
| <i>Sinapis alba</i> | KAF8096053.1 | RLK | LRR       |
| <i>Sinapis alba</i> | KAF8096107.1 | RLK | LRR       |
| <i>Sinapis alba</i> | KAF8096113.1 | RLK | LRR       |
| <i>Sinapis alba</i> | KAF8096127.1 | RLK | LRR       |
| <i>Sinapis alba</i> | KAF8096204.1 | RLK | Other-RLK |
| <i>Sinapis alba</i> | KAF8096329.1 | RLK | LRR       |
| <i>Sinapis alba</i> | KAF8096534.1 | RLK | Other-RLK |
| <i>Sinapis alba</i> | KAF8096575.1 | RLK | LRR       |
| <i>Sinapis alba</i> | KAF8096577.1 | RLK | LRR       |
| <i>Sinapis alba</i> | KAF8096684.1 | RLK | LRR       |
| <i>Sinapis alba</i> | KAF8096699.1 | RLK | LRR       |
| <i>Sinapis alba</i> | KAF8096733.1 | RLK | Other-RLK |
| <i>Sinapis alba</i> | KAF8096843.1 | RLK | LRR       |
| <i>Sinapis alba</i> | KAF8096888.1 | RLK | LRR       |
| <i>Sinapis alba</i> | KAF8096976.1 | RLK | Other-RLK |
| <i>Sinapis alba</i> | KAF8096977.1 | RLK | Other-RLK |
| <i>Sinapis alba</i> | KAF8096978.1 | RLK | Other-RLK |
| <i>Sinapis alba</i> | KAF8096988.1 | RLK | Other-RLK |
| <i>Sinapis alba</i> | KAF8097069.1 | RLK | LRR       |
| <i>Sinapis alba</i> | KAF8097402.1 | RLK | Other-RLK |
| <i>Sinapis alba</i> | KAF8097443.1 | RLK | LRR       |
| <i>Sinapis alba</i> | KAF8097448.1 | RLK | Other-RLK |
| <i>Sinapis alba</i> | KAF8097675.1 | RLK | Other-RLK |
| <i>Sinapis alba</i> | KAF8097676.1 | RLK | Other-RLK |
| <i>Sinapis alba</i> | KAF8097764.1 | RLK | Other-RLK |
| <i>Sinapis alba</i> | KAF8097816.1 | RLK | LRR       |
| <i>Sinapis alba</i> | KAF8097840.1 | RLK | Other-RLK |
| <i>Sinapis alba</i> | KAF8097919.1 | RLK | LRR       |
| <i>Sinapis alba</i> | KAF8097942.1 | RLK | Other-RLK |
| <i>Sinapis alba</i> | KAF8098018.1 | RLK | LRR       |
| <i>Sinapis alba</i> | KAF8098153.1 | RLK | LRR       |
| <i>Sinapis alba</i> | KAF8098160.1 | RLK | Other-RLK |
| <i>Sinapis alba</i> | KAF8098161.1 | RLK | Other-RLK |
| <i>Sinapis alba</i> | KAF8098163.1 | RLK | Other-RLK |
| <i>Sinapis alba</i> | KAF8098298.1 | RLK | Other-RLK |
| <i>Sinapis alba</i> | KAF8098353.1 | RLK | LRR       |
| <i>Sinapis alba</i> | KAF8098386.1 | RLK | LRR       |
| <i>Sinapis alba</i> | KAF8098420.1 | RLK | Other-RLK |
| <i>Sinapis alba</i> | KAF8098421.1 | RLK | Other-RLK |
| <i>Sinapis alba</i> | KAF8098493.1 | RLK | LRR       |
| <i>Sinapis alba</i> | KAF8098522.1 | RLK | LRR       |
| <i>Sinapis alba</i> | KAF8098541.1 | RLK | Other-RLK |
| <i>Sinapis alba</i> | KAF8098633.1 | RLK | Other-RLK |
| <i>Sinapis alba</i> | KAF8098634.1 | RLK | Other-RLK |
| <i>Sinapis alba</i> | KAF8098635.1 | RLK | Other-RLK |
| <i>Sinapis alba</i> | KAF8098763.1 | RLK | Other-RLK |
| <i>Sinapis alba</i> | KAF8099085.1 | RLK | Other-RLK |
| <i>Sinapis alba</i> | KAF8099107.1 | RLK | LRR       |
| <i>Sinapis alba</i> | KAF8099237.1 | RLK | LRR       |
| <i>Sinapis alba</i> | KAF8099515.1 | RLK | LRR       |
| <i>Sinapis alba</i> | KAF8099526.1 | RLK | LRR       |
| <i>Sinapis alba</i> | KAF8099679.1 | RLK | LRR       |

|                     |              |     |           |
|---------------------|--------------|-----|-----------|
| <i>Sinapis alba</i> | KAF8099804.1 | RLK | Other-RLK |
| <i>Sinapis alba</i> | KAF8099882.1 | RLK | Other-RLK |
| <i>Sinapis alba</i> | KAF8099903.1 | RLK | Other-RLK |
| <i>Sinapis alba</i> | KAF8099968.1 | RLK | LRR       |
| <i>Sinapis alba</i> | KAF8099989.1 | RLK | LRR       |
| <i>Sinapis alba</i> | KAF8100021.1 | RLK | Other-RLK |
| <i>Sinapis alba</i> | KAF8100024.1 | RLK | Other-RLK |
| <i>Sinapis alba</i> | KAF8100059.1 | RLK | Other-RLK |
| <i>Sinapis alba</i> | KAF8100158.1 | RLK | Other-RLK |
| <i>Sinapis alba</i> | KAF8100177.1 | RLK | Other-RLK |
| <i>Sinapis alba</i> | KAF8100237.1 | RLK | LRR       |
| <i>Sinapis alba</i> | KAF8100324.1 | RLK | LRR       |
| <i>Sinapis alba</i> | KAF8100325.1 | RLK | LRR       |
| <i>Sinapis alba</i> | KAF8100387.1 | RLK | Other-RLK |
| <i>Sinapis alba</i> | KAF8100418.1 | RLK | Other-RLK |
| <i>Sinapis alba</i> | KAF8100419.1 | RLK | Other-RLK |
| <i>Sinapis alba</i> | KAF8100420.1 | RLK | Other-RLK |
| <i>Sinapis alba</i> | KAF8100421.1 | RLK | Other-RLK |
| <i>Sinapis alba</i> | KAF8100595.1 | RLK | LRR       |
| <i>Sinapis alba</i> | KAF8100770.1 | RLK | LRR       |
| <i>Sinapis alba</i> | KAF8100914.1 | RLK | Other-RLK |
| <i>Sinapis alba</i> | KAF8100968.1 | RLK | LRR       |
| <i>Sinapis alba</i> | KAF8101064.1 | RLK | LRR       |
| <i>Sinapis alba</i> | KAF8101130.1 | RLK | LRR       |
| <i>Sinapis alba</i> | KAF8101333.1 | RLK | LRR       |
| <i>Sinapis alba</i> | KAF8101342.1 | RLK | Other-RLK |
| <i>Sinapis alba</i> | KAF8101370.1 | RLK | Other-RLK |
| <i>Sinapis alba</i> | KAF8101603.1 | RLK | Other-RLK |
| <i>Sinapis alba</i> | KAF8101620.1 | RLK | LRR       |
| <i>Sinapis alba</i> | KAF8101733.1 | RLK | LRR       |
| <i>Sinapis alba</i> | KAF8101829.1 | RLK | LRR       |
| <i>Sinapis alba</i> | KAF8101884.1 | RLK | Other-RLK |
| <i>Sinapis alba</i> | KAF8102006.1 | RLK | Other-RLK |
| <i>Sinapis alba</i> | KAF8102016.1 | RLK | Other-RLK |
| <i>Sinapis alba</i> | KAF8102026.1 | RLK | LRR       |
| <i>Sinapis alba</i> | KAF8102049.1 | RLK | LRR       |
| <i>Sinapis alba</i> | KAF8102167.1 | RLK | LRR       |
| <i>Sinapis alba</i> | KAF8102232.1 | RLK | Other-RLK |
| <i>Sinapis alba</i> | KAF8102251.1 | RLK | Other-RLK |
| <i>Sinapis alba</i> | KAF8102253.1 | RLK | Other-RLK |
| <i>Sinapis alba</i> | KAF8102262.1 | RLK | LRR       |
| <i>Sinapis alba</i> | KAF8102363.1 | RLK | Other-RLK |
| <i>Sinapis alba</i> | KAF8102366.1 | RLK | Other-RLK |
| <i>Sinapis alba</i> | KAF8102367.1 | RLK | Other-RLK |
| <i>Sinapis alba</i> | KAF8102368.1 | RLK | Other-RLK |
| <i>Sinapis alba</i> | KAF8102369.1 | RLK | Other-RLK |
| <i>Sinapis alba</i> | KAF8102371.1 | RLK | Other-RLK |
| <i>Sinapis alba</i> | KAF8102372.1 | RLK | Other-RLK |
| <i>Sinapis alba</i> | KAF8102375.1 | RLK | Other-RLK |
| <i>Sinapis alba</i> | KAF8102413.1 | RLK | Other-RLK |
| <i>Sinapis alba</i> | KAF8102414.1 | RLK | LRR       |
| <i>Sinapis alba</i> | KAF8102417.1 | RLK | LRR       |
| <i>Sinapis alba</i> | KAF8102418.1 | RLK | LRR       |
| <i>Sinapis alba</i> | KAF8102461.1 | RLK | Other-RLK |
| <i>Sinapis alba</i> | KAF8102505.1 | RLK | Other-RLK |
| <i>Sinapis alba</i> | KAF8102520.1 | RLK | Other-RLK |
| <i>Sinapis alba</i> | KAF8102646.1 | RLK | Other-RLK |
| <i>Sinapis alba</i> | KAF8102730.1 | RLK | Other-RLK |
| <i>Sinapis alba</i> | KAF8102742.1 | RLK | LRR       |
| <i>Sinapis alba</i> | KAF8102832.1 | RLK | LRR       |
| <i>Sinapis alba</i> | KAF8102855.1 | RLK | LRR       |
| <i>Sinapis alba</i> | KAF8102857.1 | RLK | Other-RLK |

|                     |              |     |           |
|---------------------|--------------|-----|-----------|
| <i>Sinapis alba</i> | KAF8102880.1 | RLK | Other-RLK |
| <i>Sinapis alba</i> | KAF8103088.1 | RLK | Other-RLK |
| <i>Sinapis alba</i> | KAF8103167.1 | RLK | Other-RLK |
| <i>Sinapis alba</i> | KAF8103307.1 | RLK | LRR       |
| <i>Sinapis alba</i> | KAF8103396.1 | RLK | Other-RLK |
| <i>Sinapis alba</i> | KAF8103426.1 | RLK | Other-RLK |
| <i>Sinapis alba</i> | KAF8103475.1 | RLK | LRR       |
| <i>Sinapis alba</i> | KAF8103512.1 | RLK | Other-RLK |
| <i>Sinapis alba</i> | KAF8103635.1 | RLK | Other-RLK |
| <i>Sinapis alba</i> | KAF8103755.1 | RLK | LRR       |
| <i>Sinapis alba</i> | KAF8103763.1 | RLK | Other-RLK |
| <i>Sinapis alba</i> | KAF8103768.1 | RLK | Other-RLK |
| <i>Sinapis alba</i> | KAF8103875.1 | RLK | Other-RLK |
| <i>Sinapis alba</i> | KAF8104200.1 | RLK | Other-RLK |
| <i>Sinapis alba</i> | KAF8104201.1 | RLK | Other-RLK |
| <i>Sinapis alba</i> | KAF8104232.1 | RLK | Other-RLK |
| <i>Sinapis alba</i> | KAF8104790.1 | RLK | Other-RLK |
| <i>Sinapis alba</i> | KAF8105097.1 | RLK | Other-RLK |
| <i>Sinapis alba</i> | KAF8105106.1 | RLK | Other-RLK |
| <i>Sinapis alba</i> | KAF8105394.1 | RLK | Other-RLK |
| <i>Sinapis alba</i> | KAF8105546.1 | RLK | Other-RLK |
| <i>Sinapis alba</i> | KAF8105612.1 | RLK | LRR       |
| <i>Sinapis alba</i> | KAF8105627.1 | RLK | LRR       |
| <i>Sinapis alba</i> | KAF8105656.1 | RLK | LRR       |
| <i>Sinapis alba</i> | KAF8105748.1 | RLK | LRR       |
| <i>Sinapis alba</i> | KAF8105807.1 | RLK | Other-RLK |
| <i>Sinapis alba</i> | KAF8106008.1 | RLK | Other-RLK |
| <i>Sinapis alba</i> | KAF8106009.1 | RLK | Other-RLK |
| <i>Sinapis alba</i> | KAF8106010.1 | RLK | Other-RLK |
| <i>Sinapis alba</i> | KAF8106039.1 | RLK | LRR       |
| <i>Sinapis alba</i> | KAF8106057.1 | RLK | Other-RLK |
| <i>Sinapis alba</i> | KAF8106109.1 | RLK | Other-RLK |
| <i>Sinapis alba</i> | KAF8106180.1 | RLK | Other-RLK |
| <i>Sinapis alba</i> | KAF8106284.1 | RLK | LRR       |
| <i>Sinapis alba</i> | KAF8106291.1 | RLK | Other-RLK |
| <i>Sinapis alba</i> | KAF8106351.1 | RLK | Other-RLK |
| <i>Sinapis alba</i> | KAF8106352.1 | RLK | Other-RLK |
| <i>Sinapis alba</i> | KAF8106353.1 | RLK | Other-RLK |
| <i>Sinapis alba</i> | KAF8106413.1 | RLK | LRR       |
| <i>Sinapis alba</i> | KAF8106532.1 | RLK | Other-RLK |
| <i>Sinapis alba</i> | KAF8106731.1 | RLK | LRR       |
| <i>Sinapis alba</i> | KAF8106732.1 | RLK | LRR       |
| <i>Sinapis alba</i> | KAF8107083.1 | RLK | Other-RLK |
| <i>Sinapis alba</i> | KAF8107113.1 | RLK | Other-RLK |
| <i>Sinapis alba</i> | KAF8107252.1 | RLK | LRR       |
| <i>Sinapis alba</i> | KAF8107291.1 | RLK | Other-RLK |
| <i>Sinapis alba</i> | KAF8107361.1 | RLK | Other-RLK |
| <i>Sinapis alba</i> | KAF8107373.1 | RLK | Other-RLK |
| <i>Sinapis alba</i> | KAF8107482.1 | RLK | Other-RLK |
| <i>Sinapis alba</i> | KAF8107514.1 | RLK | Other-RLK |
| <i>Sinapis alba</i> | KAF8107515.1 | RLK | Other-RLK |
| <i>Sinapis alba</i> | KAF8107552.1 | RLK | Other-RLK |
| <i>Sinapis alba</i> | KAF8107793.1 | RLK | LRR       |
| <i>Sinapis alba</i> | KAF8107794.1 | RLK | LRR       |
| <i>Sinapis alba</i> | KAF8107795.1 | RLK | LRR       |
| <i>Sinapis alba</i> | KAF8107798.1 | RLK | LRR       |
| <i>Sinapis alba</i> | KAF8107801.1 | RLK | LRR       |
| <i>Sinapis alba</i> | KAF8107802.1 | RLK | LRR       |
| <i>Sinapis alba</i> | KAF8107870.1 | RLK | LRR       |
| <i>Sinapis alba</i> | KAF8107970.1 | RLK | LRR       |
| <i>Sinapis alba</i> | KAF8107985.1 | RLK | Other-RLK |
| <i>Sinapis alba</i> | KAF8108036.1 | RLK | LRR       |

|                     |              |     |           |
|---------------------|--------------|-----|-----------|
| <i>Sinapis alba</i> | KAF8108076.1 | RLK | Other-RLK |
| <i>Sinapis alba</i> | KAF8108138.1 | RLK | Other-RLK |
| <i>Sinapis alba</i> | KAF8108175.1 | RLK | Other-RLK |
| <i>Sinapis alba</i> | KAF8108219.1 | RLK | Other-RLK |
| <i>Sinapis alba</i> | KAF8108296.1 | RLK | Other-RLK |
| <i>Sinapis alba</i> | KAF8108311.1 | RLK | Other-RLK |
| <i>Sinapis alba</i> | KAF8108504.1 | RLK | Other-RLK |
| <i>Sinapis alba</i> | KAF8108582.1 | RLK | Other-RLK |
| <i>Sinapis alba</i> | KAF8108583.1 | RLK | LRR       |
| <i>Sinapis alba</i> | KAF8108584.1 | RLK | LRR       |
| <i>Sinapis alba</i> | KAF8108623.1 | RLK | LRR       |
| <i>Sinapis alba</i> | KAF8108642.1 | RLK | Other-RLK |
| <i>Sinapis alba</i> | KAF8108643.1 | RLK | Other-RLK |
| <i>Sinapis alba</i> | KAF8108666.1 | RLK | Other-RLK |
| <i>Sinapis alba</i> | KAF8108670.1 | RLK | Other-RLK |
| <i>Sinapis alba</i> | KAF8108671.1 | RLK | Other-RLK |
| <i>Sinapis alba</i> | KAF8108800.1 | RLK | LRR       |
| <i>Sinapis alba</i> | KAF8108838.1 | RLK | Lysm      |
| <i>Sinapis alba</i> | KAF8108950.1 | RLK | LRR       |
| <i>Sinapis alba</i> | KAF8109116.1 | RLK | LRR       |
| <i>Sinapis alba</i> | KAF8109131.1 | RLK | LRR       |
| <i>Sinapis alba</i> | KAF8109411.1 | RLK | Other-RLK |
| <i>Sinapis alba</i> | KAF8109435.1 | RLK | LRR       |
| <i>Sinapis alba</i> | KAF8109558.1 | RLK | Other-RLK |
| <i>Sinapis alba</i> | KAF8109680.1 | RLK | Other-RLK |
| <i>Sinapis alba</i> | KAF8109690.1 | RLK | LRR       |
| <i>Sinapis alba</i> | KAF8109708.1 | RLK | Other-RLK |
| <i>Sinapis alba</i> | KAF8109709.1 | RLK | Other-RLK |
| <i>Sinapis alba</i> | KAF8109710.1 | RLK | Other-RLK |
| <i>Sinapis alba</i> | KAF8109716.1 | RLK | Other-RLK |
| <i>Sinapis alba</i> | KAF8109717.1 | RLK | Other-RLK |
| <i>Sinapis alba</i> | KAF8109718.1 | RLK | Other-RLK |
| <i>Sinapis alba</i> | KAF8109719.1 | RLK | Other-RLK |
| <i>Sinapis alba</i> | KAF8109720.1 | RLK | Other-RLK |
| <i>Sinapis alba</i> | KAF8109721.1 | RLK | Other-RLK |
| <i>Sinapis alba</i> | KAF8109723.1 | RLK | Other-RLK |
| <i>Sinapis alba</i> | KAF8109725.1 | RLK | LRR       |
| <i>Sinapis alba</i> | KAF8109991.1 | RLK | Other-RLK |
| <i>Sinapis alba</i> | KAF8110100.1 | RLK | Other-RLK |
| <i>Sinapis alba</i> | KAF8110216.1 | RLK | Other-RLK |
| <i>Sinapis alba</i> | KAF8110217.1 | RLK | Other-RLK |
| <i>Sinapis alba</i> | KAF8110281.1 | RLK | LRR       |
| <i>Sinapis alba</i> | KAF8110282.1 | RLK | Other-RLK |
| <i>Sinapis alba</i> | KAF8110333.1 | RLK | Other-RLK |
| <i>Sinapis alba</i> | KAF8110428.1 | RLK | Other-RLK |
| <i>Sinapis alba</i> | KAF8110430.1 | RLK | Other-RLK |
| <i>Sinapis alba</i> | KAF8110466.1 | RLK | LRR       |
| <i>Sinapis alba</i> | KAF8110467.1 | RLK | LRR       |
| <i>Sinapis alba</i> | KAF8110468.1 | RLK | LRR       |
| <i>Sinapis alba</i> | KAF8110503.1 | RLK | LRR       |
| <i>Sinapis alba</i> | KAF8110552.1 | RLK | Other-RLK |
| <i>Sinapis alba</i> | KAF8110589.1 | RLK | Other-RLK |
| <i>Sinapis alba</i> | KAF8110694.1 | RLK | Other-RLK |
| <i>Sinapis alba</i> | KAF8110715.1 | RLK | Other-RLK |
| <i>Sinapis alba</i> | KAF8110728.1 | RLK | Other-RLK |
| <i>Sinapis alba</i> | KAF8110815.1 | RLK | Other-RLK |
| <i>Sinapis alba</i> | KAF8110824.1 | RLK | Other-RLK |
| <i>Sinapis alba</i> | KAF8110825.1 | RLK | Other-RLK |
| <i>Sinapis alba</i> | KAF8110834.1 | RLK | LRR       |
| <i>Sinapis alba</i> | KAF8110835.1 | RLK | LRR       |
| <i>Sinapis alba</i> | KAF8110885.1 | RLK | Other-RLK |
| <i>Sinapis alba</i> | KAF8110886.1 | RLK | Other-RLK |



|                     |              |     |           |
|---------------------|--------------|-----|-----------|
| <i>Sinapis alba</i> | KAF8110904.1 | RLK | Other-RLK |
| <i>Sinapis alba</i> | KAF8110905.1 | RLK | Other-RLK |
| <i>Sinapis alba</i> | KAF8110913.1 | RLK | Other-RLK |
| <i>Sinapis alba</i> | KAF8111008.1 | RLK | LRR       |
| <i>Sinapis alba</i> | KAF8111056.1 | RLK | Other-RLK |
| <i>Sinapis alba</i> | KAF8111059.1 | RLK | LRR       |
| <i>Sinapis alba</i> | KAF8111067.1 | RLK | Other-RLK |
| <i>Sinapis alba</i> | KAF8111068.1 | RLK | Other-RLK |
| <i>Sinapis alba</i> | KAF8111069.1 | RLK | Other-RLK |
| <i>Sinapis alba</i> | KAF8111133.1 | RLK | LRR       |
| <i>Sinapis alba</i> | KAF8111143.1 | RLK | LRR       |
| <i>Sinapis alba</i> | KAF8111193.1 | RLK | Other-RLK |
| <i>Sinapis alba</i> | KAF8111194.1 | RLK | Other-RLK |
| <i>Sinapis alba</i> | KAF8111199.1 | RLK | LRR       |
| <i>Sinapis alba</i> | KAF8111233.1 | RLK | LRR       |
| <i>Sinapis alba</i> | KAF8111343.1 | RLK | Other-RLK |
| <i>Sinapis alba</i> | KAF8111400.1 | RLK | LRR       |
| <i>Sinapis alba</i> | KAF8111519.1 | RLK | Other-RLK |
| <i>Sinapis alba</i> | KAF8111930.1 | RLK | LRR       |
| <i>Sinapis alba</i> | KAF8111972.1 | RLK | Other-RLK |
| <i>Sinapis alba</i> | KAF8112138.1 | RLK | Other-RLK |
| <i>Sinapis alba</i> | KAF8112144.1 | RLK | Other-RLK |
| <i>Sinapis alba</i> | KAF8112169.1 | RLK | Other-RLK |
| <i>Sinapis alba</i> | KAF8112283.1 | RLK | Other-RLK |
| <i>Sinapis alba</i> | KAF8112288.1 | RLK | Other-RLK |
| <i>Sinapis alba</i> | KAF8112314.1 | RLK | LRR       |
| <i>Sinapis alba</i> | KAF8112364.1 | RLK | Other-RLK |
| <i>Sinapis alba</i> | KAF8112365.1 | RLK | Other-RLK |
| <i>Sinapis alba</i> | KAF8112520.1 | RLK | LRR       |
| <i>Sinapis alba</i> | KAF8112521.1 | RLK | LRR       |
| <i>Sinapis alba</i> | KAF8112522.1 | RLK | LRR       |
| <i>Sinapis alba</i> | KAF8112523.1 | RLK | LRR       |
| <i>Sinapis alba</i> | KAF8112524.1 | RLK | LRR       |
| <i>Sinapis alba</i> | KAF8112525.1 | RLK | LRR       |
| <i>Sinapis alba</i> | KAF8112589.1 | RLK | LRR       |
| <i>Sinapis alba</i> | KAF8112629.1 | RLK | LRR       |
| <i>Sinapis alba</i> | KAF8112630.1 | RLK | LRR       |
| <i>Sinapis alba</i> | KAF8112671.1 | RLK | Other-RLK |
| <i>Sinapis alba</i> | KAF8112741.1 | RLK | LRR       |
| <i>Sinapis alba</i> | KAF8112805.1 | RLK | LRR       |
| <i>Sinapis alba</i> | KAF8112824.1 | RLK | Other-RLK |
| <i>Sinapis alba</i> | KAF8112826.1 | RLK | Other-RLK |
| <i>Sinapis alba</i> | KAF8112827.1 | RLK | Other-RLK |
| <i>Sinapis alba</i> | KAF8112831.1 | RLK | Other-RLK |
| <i>Sinapis alba</i> | KAF8112832.1 | RLK | Other-RLK |
| <i>Sinapis alba</i> | KAF8112874.1 | RLK | Other-RLK |
| <i>Sinapis alba</i> | KAF8112887.1 | RLK | LRR       |
| <i>Sinapis alba</i> | KAF8113004.1 | RLK | Other-RLK |
| <i>Sinapis alba</i> | KAF8113020.1 | RLK | Other-RLK |
| <i>Sinapis alba</i> | KAF8113236.1 | RLK | Other-RLK |
| <i>Sinapis alba</i> | KAF8113278.1 | RLK | LRR       |
| <i>Sinapis alba</i> | KAF8113281.1 | RLK | LRR       |
| <i>Sinapis alba</i> | KAF8113366.1 | RLK | Other-RLK |
| <i>Sinapis alba</i> | KAF8113367.1 | RLK | Other-RLK |
| <i>Sinapis alba</i> | KAF8113369.1 | RLK | Other-RLK |
| <i>Sinapis alba</i> | KAF8113411.1 | RLK | LRR       |
| <i>Sinapis alba</i> | KAF8113426.1 | RLK | LRR       |
| <i>Sinapis alba</i> | KAF8113479.1 | RLK | Other-RLK |
| <i>Sinapis alba</i> | KAF8113640.1 | RLK | LRR       |
| <i>Sinapis alba</i> | KAF8113646.1 | RLK | Other-RLK |
| <i>Sinapis alba</i> | KAF8113647.1 | RLK | Other-RLK |
| <i>Sinapis alba</i> | KAF8113648.1 | RLK | Other-RLK |

|                     |              |     |           |
|---------------------|--------------|-----|-----------|
| <i>Sinapis alba</i> | KAF8113662.1 | RLK | Other-RLK |
| <i>Sinapis alba</i> | KAF8113664.1 | RLK | Other-RLK |
| <i>Sinapis alba</i> | KAF8113665.1 | RLK | Other-RLK |
| <i>Sinapis alba</i> | KAF8113752.1 | RLK | LRR       |
| <i>Sinapis alba</i> | KAF8113892.1 | RLK | LRR       |
| <i>Sinapis alba</i> | KAF8113956.1 | RLK | LRR       |
| <i>Sinapis alba</i> | KAF8114145.1 | RLK | Other-RLK |
| <i>Sinapis alba</i> | KAF8114153.1 | RLK | Other-RLK |
| <i>Sinapis alba</i> | KAF8114156.1 | RLK | Other-RLK |
| <i>Sinapis alba</i> | KAF8114158.1 | RLK | Other-RLK |
| <i>Sinapis alba</i> | KAF8114159.1 | RLK | Other-RLK |
| <i>Sinapis alba</i> | KAF8114160.1 | RLK | Other-RLK |
| <i>Sinapis alba</i> | KAF8114161.1 | RLK | Other-RLK |
| <i>Sinapis alba</i> | KAF8114223.1 | RLK | LRR       |
| <i>Sinapis alba</i> | KAF8114284.1 | RLK | Other-RLK |
| <i>Sinapis alba</i> | KAF8114311.1 | RLK | Other-RLK |
| <i>Sinapis alba</i> | KAF8114365.1 | RLK | Other-RLK |
| <i>Sinapis alba</i> | KAF8114366.1 | RLK | Other-RLK |
| <i>Sinapis alba</i> | KAF8114468.1 | RLK | Other-RLK |
| <i>Sinapis alba</i> | KAF8114470.1 | RLK | LRR       |
| <i>Sinapis alba</i> | KAF8114482.1 | RLK | LRR       |
| <i>Sinapis alba</i> | KAF8114591.1 | RLK | Other-RLK |
| <i>Sinapis alba</i> | KAF8114592.1 | RLK | Other-RLK |
| <i>Sinapis alba</i> | KAF8114698.1 | RLK | Other-RLK |
| <i>Sinapis alba</i> | KAF8114832.1 | RLK | Other-RLK |
| <i>Sinapis alba</i> | KAF8114849.1 | RLK | LRR       |
| <i>Sinapis alba</i> | KAF8114962.1 | RLK | LRR       |
| <i>Sinapis alba</i> | KAF8114983.1 | RLK | LRR       |
| <i>Sinapis alba</i> | KAF8115004.1 | RLK | Other-RLK |
| <i>Sinapis alba</i> | KAF8115005.1 | RLK | Other-RLK |
| <i>Sinapis alba</i> | KAF8115044.1 | RLK | LRR       |
| <i>Sinapis alba</i> | KAF8115114.1 | RLK | Other-RLK |
| <i>Sinapis alba</i> | KAF8115135.1 | RLK | Other-RLK |
| <i>Sinapis alba</i> | KAF8115137.1 | RLK | Other-RLK |
| <i>Sinapis alba</i> | KAF8115215.1 | RLK | LRR       |
| <i>Sinapis alba</i> | KAF8115369.1 | RLK | LRR       |
| <i>Sinapis alba</i> | KAF8115536.1 | RLK | LRR       |
| <i>Sinapis alba</i> | KAF8115543.1 | RLK | LRR       |
| <i>Sinapis alba</i> | KAF8115552.1 | RLK | Other-RLK |
| <i>Sinapis alba</i> | KAF8115579.1 | RLK | LRR       |
| <i>Sinapis alba</i> | KAF8115589.1 | RLK | LRR       |
| <i>Sinapis alba</i> | KAF8115591.1 | RLK | LRR       |
| <i>Sinapis alba</i> | KAF8115597.1 | RLK | Other-RLK |
| <i>Sinapis alba</i> | KAF8115598.1 | RLK | Other-RLK |
| <i>Sinapis alba</i> | KAF8115764.1 | RLK | LRR       |
| <i>Sinapis alba</i> | KAF8115808.1 | RLK | Other-RLK |
| <i>Sinapis alba</i> | KAF8115809.1 | RLK | Other-RLK |
| <i>Sinapis alba</i> | KAF8115842.1 | RLK | Other-RLK |
| <i>Sinapis alba</i> | KAF8115934.1 | RLK | Other-RLK |
| <i>Sinapis alba</i> | KAF8116034.1 | RLK | Other-RLK |
| <i>Sinapis alba</i> | KAF8116265.1 | RLK | LRR       |
| <i>Sinapis alba</i> | KAF8116327.1 | RLK | LRR       |
| <i>Sinapis alba</i> | KAF8116439.1 | RLK | LRR       |
| <i>Sinapis alba</i> | KAF8116499.1 | RLK | Other-RLK |
| <i>Sinapis alba</i> | KAF8116518.1 | RLK | Other-RLK |
| <i>Sinapis alba</i> | KAF8116519.1 | RLK | Other-RLK |
| <i>Sinapis alba</i> | KAF8116524.1 | RLK | Other-RLK |
| <i>Sinapis alba</i> | KAF8116725.1 | RLK | LRR       |
| <i>Sinapis alba</i> | KAF8116755.1 | RLK | Other-RLK |
| <i>Sinapis alba</i> | KAF8116823.1 | RLK | LRR       |
| <i>Sinapis alba</i> | KAF8116864.1 | RLK | Other-RLK |
| <i>Sinapis alba</i> | KAF8116874.1 | RLK | Other-RLK |

|                     |              |     |           |
|---------------------|--------------|-----|-----------|
| <i>Sinapis alba</i> | KAF8116875.1 | RLK | Other-RLK |
| <i>Sinapis alba</i> | KAF8116968.1 | RLK | LRR       |
| <i>Sinapis alba</i> | KAF8117029.1 | RLK | LRR       |
| <i>Sinapis alba</i> | KAF8117050.1 | RLK | LRR       |
| <i>Sinapis alba</i> | KAF8117201.1 | RLK | LRR       |
| <i>Sinapis alba</i> | KAF8117233.1 | RLK | LRR       |
| <i>Sinapis alba</i> | KAF8117234.1 | RLK | Other-RLK |
| <i>Sinapis alba</i> | KAF8117308.1 | RLK | Other-RLK |
| <i>Sinapis alba</i> | KAF8117492.1 | RLK | LRR       |
| <i>Sinapis alba</i> | KAF8117505.1 | RLK | LRR       |
| <i>Sinapis alba</i> | KAF8117524.1 | RLK | LRR       |
| <i>Sinapis alba</i> | KAF8117549.1 | RLK | LRR       |
| <i>Sinapis alba</i> | KAF8117626.1 | RLK | LRR       |
| <i>Sinapis alba</i> | KAF8117650.1 | RLK | LRR       |
| <i>Sinapis alba</i> | KAF8117974.1 | RLK | LRR       |
| <i>Sinapis alba</i> | KAF8118001.1 | RLK | LRR       |
| <i>Sinapis alba</i> | KAF8118080.1 | RLK | LRR       |
| <i>Sinapis alba</i> | KAF8118138.1 | RLK | Other-RLK |
| <i>Sinapis alba</i> | KAF8118183.1 | RLK | Other-RLK |
| <i>Sinapis alba</i> | KAF8118264.1 | RLK | Other-RLK |
| <i>Sinapis alba</i> | KAF8118269.1 | RLK | LRR       |
| <i>Sinapis alba</i> | KAF8118306.1 | RLK | Other-RLK |
| <i>Sinapis alba</i> | KAF8118601.1 | RLK | Other-RLK |
| <i>Sinapis alba</i> | KAF8118613.1 | RLK | LRR       |
| <i>Sinapis alba</i> | KAF8118614.1 | RLK | LRR       |
| <i>Sinapis alba</i> | KAF8118617.1 | RLK | Other-RLK |
| <i>Sinapis alba</i> | KAF8118619.1 | RLK | Other-RLK |
| <i>Sinapis alba</i> | KAF8118621.1 | RLK | LRR       |
| <i>Sinapis alba</i> | KAF8118721.1 | RLK | Other-RLK |
| <i>Sinapis alba</i> | KAF8118755.1 | RLK | LRR       |
| <i>Sinapis alba</i> | KAF8118756.1 | RLK | LRR       |
| <i>Sinapis alba</i> | KAF8118919.1 | RLK | Other-RLK |
| <i>Sinapis alba</i> | KAF8118948.1 | RLK | LRR       |
| <i>Sinapis alba</i> | KAF8119012.1 | RLK | Other-RLK |
| <i>Sinapis alba</i> | KAF8119053.1 | RLK | LRR       |
| <i>Sinapis alba</i> | KAF8119059.1 | RLK | Other-RLK |
| <i>Sinapis alba</i> | KAF8119066.1 | RLK | Other-RLK |
| <i>Sinapis alba</i> | KAF8119120.1 | RLK | Other-RLK |
| <i>Sinapis alba</i> | KAF8044821.1 | RLP | LRR       |
| <i>Sinapis alba</i> | KAF8045120.1 | RLP | LRR       |
| <i>Sinapis alba</i> | KAF8045221.1 | RLP | LRR       |
| <i>Sinapis alba</i> | KAF8045493.1 | RLP | LRR       |
| <i>Sinapis alba</i> | KAF8045895.1 | RLP | LRR       |
| <i>Sinapis alba</i> | KAF8046449.1 | RLP | LRR       |
| <i>Sinapis alba</i> | KAF8046956.1 | RLP | Lysm      |
| <i>Sinapis alba</i> | KAF8047904.1 | RLP | LRR       |
| <i>Sinapis alba</i> | KAF8048753.1 | RLP | LRR       |
| <i>Sinapis alba</i> | KAF8048754.1 | RLP | LRR       |
| <i>Sinapis alba</i> | KAF8049633.1 | RLP | LRR       |
| <i>Sinapis alba</i> | KAF8049889.1 | RLP | LRR       |
| <i>Sinapis alba</i> | KAF8050784.1 | RLP | LRR       |
| <i>Sinapis alba</i> | KAF8051500.1 | RLP | LRR       |
| <i>Sinapis alba</i> | KAF8051803.1 | RLP | LRR       |
| <i>Sinapis alba</i> | KAF8052573.1 | RLP | LRR       |
| <i>Sinapis alba</i> | KAF8053316.1 | RLP | LRR       |
| <i>Sinapis alba</i> | KAF8053593.1 | RLP | LRR       |
| <i>Sinapis alba</i> | KAF8053603.1 | RLP | LRR       |
| <i>Sinapis alba</i> | KAF8054047.1 | RLP | LRR       |
| <i>Sinapis alba</i> | KAF8054888.1 | RLP | LRR       |
| <i>Sinapis alba</i> | KAF8055604.1 | RLP | LRR       |
| <i>Sinapis alba</i> | KAF8062126.1 | RLP | LRR       |
| <i>Sinapis alba</i> | KAF8067433.1 | RLP | LRR       |

|                     |              |     |      |
|---------------------|--------------|-----|------|
| <i>Sinapis alba</i> | KAF8068486.1 | RLP | LRR  |
| <i>Sinapis alba</i> | KAF8074312.1 | RLP | LRR  |
| <i>Sinapis alba</i> | KAF8074427.1 | RLP | LRR  |
| <i>Sinapis alba</i> | KAF8074431.1 | RLP | LRR  |
| <i>Sinapis alba</i> | KAF8074432.1 | RLP | LRR  |
| <i>Sinapis alba</i> | KAF8079461.1 | RLP | LRR  |
| <i>Sinapis alba</i> | KAF8079511.1 | RLP | LRR  |
| <i>Sinapis alba</i> | KAF8079512.1 | RLP | LRR  |
| <i>Sinapis alba</i> | KAF8080090.1 | RLP | LRR  |
| <i>Sinapis alba</i> | KAF8080091.1 | RLP | LRR  |
| <i>Sinapis alba</i> | KAF8080217.1 | RLP | LRR  |
| <i>Sinapis alba</i> | KAF8080653.1 | RLP | LRR  |
| <i>Sinapis alba</i> | KAF8080806.1 | RLP | LRR  |
| <i>Sinapis alba</i> | KAF8080834.1 | RLP | LRR  |
| <i>Sinapis alba</i> | KAF8081125.1 | RLP | LRR  |
| <i>Sinapis alba</i> | KAF8082066.1 | RLP | LRR  |
| <i>Sinapis alba</i> | KAF8083537.1 | RLP | LRR  |
| <i>Sinapis alba</i> | KAF8083882.1 | RLP | LRR  |
| <i>Sinapis alba</i> | KAF8084401.1 | RLP | LRR  |
| <i>Sinapis alba</i> | KAF8085518.1 | RLP | LRR  |
| <i>Sinapis alba</i> | KAF8085519.1 | RLP | LRR  |
| <i>Sinapis alba</i> | KAF8085554.1 | RLP | LRR  |
| <i>Sinapis alba</i> | KAF8085575.1 | RLP | LRR  |
| <i>Sinapis alba</i> | KAF8085576.1 | RLP | LRR  |
| <i>Sinapis alba</i> | KAF8086480.1 | RLP | Lysm |
| <i>Sinapis alba</i> | KAF8086610.1 | RLP | LRR  |
| <i>Sinapis alba</i> | KAF8087431.1 | RLP | LRR  |
| <i>Sinapis alba</i> | KAF8088459.1 | RLP | Lysm |
| <i>Sinapis alba</i> | KAF8088559.1 | RLP | LRR  |
| <i>Sinapis alba</i> | KAF8089464.1 | RLP | LRR  |
| <i>Sinapis alba</i> | KAF8090082.1 | RLP | LRR  |
| <i>Sinapis alba</i> | KAF8090138.1 | RLP | LRR  |
| <i>Sinapis alba</i> | KAF8090145.1 | RLP | LRR  |
| <i>Sinapis alba</i> | KAF8092002.1 | RLP | LRR  |
| <i>Sinapis alba</i> | KAF8092574.1 | RLP | LRR  |
| <i>Sinapis alba</i> | KAF8092581.1 | RLP | LRR  |
| <i>Sinapis alba</i> | KAF8092938.1 | RLP | LRR  |
| <i>Sinapis alba</i> | KAF8093213.1 | RLP | LRR  |
| <i>Sinapis alba</i> | KAF8095127.1 | RLP | LRR  |
| <i>Sinapis alba</i> | KAF8095496.1 | RLP | LRR  |
| <i>Sinapis alba</i> | KAF8096085.1 | RLP | LRR  |
| <i>Sinapis alba</i> | KAF8096090.1 | RLP | LRR  |
| <i>Sinapis alba</i> | KAF8096091.1 | RLP | LRR  |
| <i>Sinapis alba</i> | KAF8096567.1 | RLP | LRR  |
| <i>Sinapis alba</i> | KAF8096659.1 | RLP | LRR  |
| <i>Sinapis alba</i> | KAF8097181.1 | RLP | LRR  |
| <i>Sinapis alba</i> | KAF8097453.1 | RLP | LRR  |
| <i>Sinapis alba</i> | KAF8097590.1 | RLP | LRR  |
| <i>Sinapis alba</i> | KAF8097591.1 | RLP | LRR  |
| <i>Sinapis alba</i> | KAF8097592.1 | RLP | LRR  |
| <i>Sinapis alba</i> | KAF8097915.1 | RLP | LRR  |
| <i>Sinapis alba</i> | KAF8098072.1 | RLP | LRR  |
| <i>Sinapis alba</i> | KAF8098726.1 | RLP | LRR  |
| <i>Sinapis alba</i> | KAF8099627.1 | RLP | LRR  |
| <i>Sinapis alba</i> | KAF8099659.1 | RLP | LRR  |
| <i>Sinapis alba</i> | KAF8099869.1 | RLP | LRR  |
| <i>Sinapis alba</i> | KAF8100137.1 | RLP | LRR  |
| <i>Sinapis alba</i> | KAF8100413.1 | RLP | LRR  |
| <i>Sinapis alba</i> | KAF8100435.1 | RLP | LRR  |
| <i>Sinapis alba</i> | KAF8100623.1 | RLP | LRR  |
| <i>Sinapis alba</i> | KAF8100624.1 | RLP | LRR  |
| <i>Sinapis alba</i> | KAF8100917.1 | RLP | LRR  |

|                                |              |     |     |
|--------------------------------|--------------|-----|-----|
| <i>Sinapis alba</i>            | KAF8100970.1 | RLP | LRR |
| <i>Sinapis alba</i>            | KAF8101499.1 | RLP | LRR |
| <i>Sinapis alba</i>            | KAF8102001.1 | RLP | LRR |
| <i>Sinapis alba</i>            | KAF8102695.1 | RLP | LRR |
| <i>Sinapis alba</i>            | KAF8103832.1 | RLP | LRR |
| <i>Sinapis alba</i>            | KAF8103883.1 | RLP | LRR |
| <i>Sinapis alba</i>            | KAF8104053.1 | RLP | LRR |
| <i>Sinapis alba</i>            | KAF8104264.1 | RLP | LRR |
| <i>Sinapis alba</i>            | KAF8104450.1 | RLP | LRR |
| <i>Sinapis alba</i>            | KAF8104908.1 | RLP | LRR |
| <i>Sinapis alba</i>            | KAF8105233.1 | RLP | LRR |
| <i>Sinapis alba</i>            | KAF8105234.1 | RLP | LRR |
| <i>Sinapis alba</i>            | KAF8105293.1 | RLP | LRR |
| <i>Sinapis alba</i>            | KAF8105661.1 | RLP | LRR |
| <i>Sinapis alba</i>            | KAF8106027.1 | RLP | LRR |
| <i>Sinapis alba</i>            | KAF8106071.1 | RLP | LRR |
| <i>Sinapis alba</i>            | KAF8106130.1 | RLP | LRR |
| <i>Sinapis alba</i>            | KAF8106283.1 | RLP | LRR |
| <i>Sinapis alba</i>            | KAF8106473.1 | RLP | LRR |
| <i>Sinapis alba</i>            | KAF8106575.1 | RLP | LRR |
| <i>Sinapis alba</i>            | KAF8107503.1 | RLP | LRR |
| <i>Sinapis alba</i>            | KAF8108000.1 | RLP | LRR |
| <i>Sinapis alba</i>            | KAF8108070.1 | RLP | LRR |
| <i>Sinapis alba</i>            | KAF8108121.1 | RLP | LRR |
| <i>Sinapis alba</i>            | KAF8108771.1 | RLP | LRR |
| <i>Sinapis alba</i>            | KAF8108772.1 | RLP | LRR |
| <i>Sinapis alba</i>            | KAF8108774.1 | RLP | LRR |
| <i>Sinapis alba</i>            | KAF8109087.1 | RLP | LRR |
| <i>Sinapis alba</i>            | KAF8109279.1 | RLP | LRR |
| <i>Sinapis alba</i>            | KAF8109281.1 | RLP | LRR |
| <i>Sinapis alba</i>            | KAF8109282.1 | RLP | LRR |
| <i>Sinapis alba</i>            | KAF8111633.1 | RLP | LRR |
| <i>Sinapis alba</i>            | KAF8112028.1 | RLP | LRR |
| <i>Sinapis alba</i>            | KAF8112777.1 | RLP | LRR |
| <i>Sinapis alba</i>            | KAF8112779.1 | RLP | LRR |
| <i>Sinapis alba</i>            | KAF8113251.1 | RLP | LRR |
| <i>Sinapis alba</i>            | KAF8114266.1 | RLP | LRR |
| <i>Sinapis alba</i>            | KAF8114475.1 | RLP | LRR |
| <i>Sinapis alba</i>            | KAF8115111.1 | RLP | LRR |
| <i>Sinapis alba</i>            | KAF8116764.1 | RLP | LRR |
| <i>Sinapis alba</i>            | KAF8117198.1 | RLP | LRR |
| <i>Sinapis alba</i>            | KAF8117199.1 | RLP | LRR |
| <i>Sinapis alba</i>            | KAF8117940.1 | RLP | LRR |
| <i>Sinapis alba</i>            | KAF8118680.1 | RLP | LRR |
| <i>Sinapis alba</i>            | KAF8119041.1 | RLP | LRR |
| <i>Capsella bursa-pastoris</i> | Cbp19577     | NLR | CN  |
| <i>Capsella bursa-pastoris</i> | Cbp47816     | NLR | CN  |
| <i>Capsella bursa-pastoris</i> | Cbp51319     | NLR | CN  |
| <i>Capsella bursa-pastoris</i> | Cbp52173     | NLR | CN  |
| <i>Capsella bursa-pastoris</i> | Cbp17689     | NLR | CN  |
| <i>Capsella bursa-pastoris</i> | Cbp47817     | NLR | CN  |
| <i>Capsella bursa-pastoris</i> | Cbp45485     | NLR | CN  |
| <i>Capsella bursa-pastoris</i> | Cbp13279     | NLR | CN  |
| <i>Capsella bursa-pastoris</i> | Cbp33711     | NLR | CNL |
| <i>Capsella bursa-pastoris</i> | Cbp46917     | NLR | CNL |
| <i>Capsella bursa-pastoris</i> | Cbp19028     | NLR | CNL |
| <i>Capsella bursa-pastoris</i> | Cbp32207     | NLR | CNL |
| <i>Capsella bursa-pastoris</i> | Cbp12124     | NLR | CNL |
| <i>Capsella bursa-pastoris</i> | Cbp14225     | NLR | CNL |
| <i>Capsella bursa-pastoris</i> | Cbp19189     | NLR | CNL |
| <i>Capsella bursa-pastoris</i> | Cbp45469     | NLR | CNL |
| <i>Capsella bursa-pastoris</i> | Cbp33577     | NLR | CNL |

|                                |          |     |     |
|--------------------------------|----------|-----|-----|
| <i>Capsella bursa-pastoris</i> | Cbp47695 | NLR | CNL |
| <i>Capsella bursa-pastoris</i> | Cbp32219 | NLR | CNL |
| <i>Capsella bursa-pastoris</i> | Cbp21377 | NLR | CNL |
| <i>Capsella bursa-pastoris</i> | Cbp34553 | NLR | CNL |
| <i>Capsella bursa-pastoris</i> | Cbp11464 | NLR | CNL |
| <i>Capsella bursa-pastoris</i> | Cbp44162 | NLR | CNL |
| <i>Capsella bursa-pastoris</i> | Cbp18997 | NLR | CNL |
| <i>Capsella bursa-pastoris</i> | Cbp33511 | NLR | CNL |
| <i>Capsella bursa-pastoris</i> | Cbp26414 | NLR | CNL |
| <i>Capsella bursa-pastoris</i> | Cbp16103 | NLR | CNL |
| <i>Capsella bursa-pastoris</i> | Cbp23231 | NLR | CNL |
| <i>Capsella bursa-pastoris</i> | Cbp51187 | NLR | CNL |
| <i>Capsella bursa-pastoris</i> | Cbp25969 | NLR | CNL |
| <i>Capsella bursa-pastoris</i> | Cbp33720 | NLR | CNL |
| <i>Capsella bursa-pastoris</i> | Cbp8106  | NLR | CNL |
| <i>Capsella bursa-pastoris</i> | Cbp53365 | NLR | CNL |
| <i>Capsella bursa-pastoris</i> | Cbp34552 | NLR | CNL |
| <i>Capsella bursa-pastoris</i> | Cbp811   | NLR | CNL |
| <i>Capsella bursa-pastoris</i> | Cbp28795 | NLR | CNL |
| <i>Capsella bursa-pastoris</i> | Cbp52108 | NLR | CNL |
| <i>Capsella bursa-pastoris</i> | Cbp41750 | NLR | CNL |
| <i>Capsella bursa-pastoris</i> | Cbp50135 | NLR | CNL |
| <i>Capsella bursa-pastoris</i> | Cbp45470 | NLR | CNL |
| <i>Capsella bursa-pastoris</i> | Cbp46346 | NLR | CNL |
| <i>Capsella bursa-pastoris</i> | Cbp18467 | NLR | CNL |
| <i>Capsella bursa-pastoris</i> | Cbp33852 | NLR | CNL |
| <i>Capsella bursa-pastoris</i> | Cbp47693 | NLR | CNL |
| <i>Capsella bursa-pastoris</i> | Cbp53094 | NLR | CNL |
| <i>Capsella bursa-pastoris</i> | Cbp52166 | NLR | CNL |
| <i>Capsella bursa-pastoris</i> | Cbp42070 | NLR | CNL |
| <i>Capsella bursa-pastoris</i> | Cbp51318 | NLR | CNL |
| <i>Capsella bursa-pastoris</i> | Cbp48114 | NLR | CNL |
| <i>Capsella bursa-pastoris</i> | Cbp51186 | NLR | CNL |
| <i>Capsella bursa-pastoris</i> | Cbp15059 | NLR | CNL |
| <i>Capsella bursa-pastoris</i> | Cbp21382 | NLR | CNL |
| <i>Capsella bursa-pastoris</i> | Cbp13283 | NLR | NBS |
| <i>Capsella bursa-pastoris</i> | Cbp32957 | NLR | NBS |
| <i>Capsella bursa-pastoris</i> | Cbp19079 | NLR | NBS |
| <i>Capsella bursa-pastoris</i> | Cbp6846  | NLR | NBS |
| <i>Capsella bursa-pastoris</i> | Cbp50076 | NLR | NBS |
| <i>Capsella bursa-pastoris</i> | Cbp41284 | NLR | NBS |
| <i>Capsella bursa-pastoris</i> | Cbp4034  | NLR | NBS |
| <i>Capsella bursa-pastoris</i> | Cbp51754 | NLR | NBS |
| <i>Capsella bursa-pastoris</i> | Cbp50281 | NLR | NBS |
| <i>Capsella bursa-pastoris</i> | Cbp26897 | NLR | NBS |
| <i>Capsella bursa-pastoris</i> | Cbp45467 | NLR | NBS |
| <i>Capsella bursa-pastoris</i> | Cbp46264 | NLR | NBS |
| <i>Capsella bursa-pastoris</i> | Cbp25157 | NLR | NBS |
| <i>Capsella bursa-pastoris</i> | Cbp32205 | NLR | NBS |
| <i>Capsella bursa-pastoris</i> | Cbp13280 | NLR | NBS |
| <i>Capsella bursa-pastoris</i> | Cbp4866  | NLR | NBS |
| <i>Capsella bursa-pastoris</i> | Cbp45910 | NLR | NL  |
| <i>Capsella bursa-pastoris</i> | Cbp5868  | NLR | NL  |
| <i>Capsella bursa-pastoris</i> | Cbp519   | NLR | NL  |
| <i>Capsella bursa-pastoris</i> | Cbp47529 | NLR | NL  |
| <i>Capsella bursa-pastoris</i> | Cbp48437 | NLR | NL  |
| <i>Capsella bursa-pastoris</i> | Cbp32218 | NLR | NL  |
| <i>Capsella bursa-pastoris</i> | Cbp46128 | NLR | NL  |
| <i>Capsella bursa-pastoris</i> | Cbp14253 | NLR | NL  |
| <i>Capsella bursa-pastoris</i> | Cbp11721 | NLR | NL  |
| <i>Capsella bursa-pastoris</i> | Cbp25968 | NLR | NL  |
| <i>Capsella bursa-pastoris</i> | Cbp34754 | NLR | NL  |

|                                |          |     |           |
|--------------------------------|----------|-----|-----------|
| <i>Capsella bursa-pastoris</i> | Cbp31703 | NLR | NL        |
| <i>Capsella bursa-pastoris</i> | Cbp50136 | NLR | NL        |
| <i>Capsella bursa-pastoris</i> | Cbp37986 | NLR | NL        |
| <i>Capsella bursa-pastoris</i> | Cbp38087 | NLR | NL        |
| <i>Capsella bursa-pastoris</i> | Cbp19029 | NLR | NL        |
| <i>Capsella bursa-pastoris</i> | Cbp39607 | NLR | NL        |
| <i>Capsella bursa-pastoris</i> | Cbp17170 | NLR | NL        |
| <i>Capsella bursa-pastoris</i> | Cbp5768  | NLR | NL        |
| <i>Capsella bursa-pastoris</i> | Cbp53366 | NLR | NL        |
| <i>Capsella bursa-pastoris</i> | Cbp46916 | NLR | NL        |
| <i>Capsella bursa-pastoris</i> | Cbp33710 | NLR | NL        |
| <i>Capsella bursa-pastoris</i> | Cbp22113 | NLR | NL        |
| <i>Capsella bursa-pastoris</i> | Cbp36244 | NLR | NL        |
| <i>Capsella bursa-pastoris</i> | Cbp19041 | NLR | NL        |
| <i>Capsella bursa-pastoris</i> | Cbp16342 | NLR | NL        |
| <i>Capsella bursa-pastoris</i> | Cbp38086 | NLR | NL        |
| <i>Capsella bursa-pastoris</i> | Cbp19051 | NLR | NL        |
| <i>Capsella bursa-pastoris</i> | Cbp29059 | NLR | NL        |
| <i>Capsella bursa-pastoris</i> | Cbp46906 | NLR | NL        |
| <i>Capsella bursa-pastoris</i> | Cbp47136 | NLR | NL        |
| <i>Capsella bursa-pastoris</i> | Cbp52531 | NLR | NL        |
| <i>Capsella bursa-pastoris</i> | Cbp19065 | NLR | NL        |
| <i>Capsella bursa-pastoris</i> | Cbp47963 | NLR | NL        |
| <i>Capsella bursa-pastoris</i> | Cbp6345  | NLR | NL        |
| <i>Capsella bursa-pastoris</i> | Cbp11946 | NLR | NL        |
| <i>Capsella bursa-pastoris</i> | Cbp19077 | NLR | NL        |
| <i>Capsella bursa-pastoris</i> | Cbp22745 | NLR | NL        |
| <i>Capsella bursa-pastoris</i> | Cbp16664 | NLR | NL        |
| <i>Capsella bursa-pastoris</i> | Cbp19042 | NLR | NL        |
| <i>Capsella bursa-pastoris</i> | Cbp52986 | NLR | NL        |
| <i>Capsella bursa-pastoris</i> | Cbp13284 | NLR | NL        |
| <i>Capsella bursa-pastoris</i> | Cbp33712 | NLR | NL        |
| <i>Capsella bursa-pastoris</i> | Cbp38624 | NLR | NL        |
| <i>Capsella bursa-pastoris</i> | Cbp28794 | NLR | NL        |
| <i>Capsella bursa-pastoris</i> | Cbp34664 | NLR | NL        |
| <i>Capsella bursa-pastoris</i> | Cbp520   | NLR | NL        |
| <i>Capsella bursa-pastoris</i> | Cbp45534 | NLR | NL        |
| <i>Capsella bursa-pastoris</i> | Cbp21935 | NLR | NL        |
| <i>Capsella bursa-pastoris</i> | Cbp33161 | NLR | NL        |
| <i>Capsella bursa-pastoris</i> | Cbp51741 | NLR | NL        |
| <i>Capsella bursa-pastoris</i> | Cbp33510 | NLR | NL        |
| <i>Capsella bursa-pastoris</i> | Cbp39399 | NLR | NL        |
| <i>Capsella bursa-pastoris</i> | Cbp11530 | NLR | NL        |
| <i>Capsella bursa-pastoris</i> | Cbp45210 | NLR | NL        |
| <i>Capsella bursa-pastoris</i> | Cbp39590 | NLR | NL        |
| <i>Capsella bursa-pastoris</i> | Cbp45504 | NLR | NL        |
| <i>Capsella bursa-pastoris</i> | Cbp19083 | NLR | NL        |
| <i>Capsella bursa-pastoris</i> | Cbp32206 | NLR | NL        |
| <i>Capsella bursa-pastoris</i> | Cbp50214 | NLR | Other-NLR |
| <i>Capsella bursa-pastoris</i> | Cbp23672 | NLR | Other-NLR |
| <i>Capsella bursa-pastoris</i> | Cbp26886 | NLR | Other-NLR |
| <i>Capsella bursa-pastoris</i> | Cbp9266  | NLR | Other-NLR |
| <i>Capsella bursa-pastoris</i> | Cbp45547 | NLR | Other-NLR |
| <i>Capsella bursa-pastoris</i> | Cbp47127 | NLR | Other-NLR |
| <i>Capsella bursa-pastoris</i> | Cbp19429 | NLR | Other-NLR |
| <i>Capsella bursa-pastoris</i> | Cbp33444 | NLR | Other-NLR |
| <i>Capsella bursa-pastoris</i> | Cbp11461 | NLR | Other-NLR |
| <i>Capsella bursa-pastoris</i> | Cbp45486 | NLR | Other-NLR |
| <i>Capsella bursa-pastoris</i> | Cbp11526 | NLR | Other-NLR |
| <i>Capsella bursa-pastoris</i> | Cbp30474 | NLR | Other-NLR |
| <i>Capsella bursa-pastoris</i> | Cbp20142 | NLR | Other-NLR |
| <i>Capsella bursa-pastoris</i> | Cbp33422 | NLR | Other-NLR |

|                                |          |     |           |
|--------------------------------|----------|-----|-----------|
| <i>Capsella bursa-pastoris</i> | Cbp45500 | NLR | Other-NLR |
| <i>Capsella bursa-pastoris</i> | Cbp33421 | NLR | Other-NLR |
| <i>Capsella bursa-pastoris</i> | Cbp33448 | NLR | Other-NLR |
| <i>Capsella bursa-pastoris</i> | Cbp44277 | NLR | Other-NLR |
| <i>Capsella bursa-pastoris</i> | Cbp26840 | NLR | Other-NLR |
| <i>Capsella bursa-pastoris</i> | Cbp44279 | NLR | Other-NLR |
| <i>Capsella bursa-pastoris</i> | Cbp13417 | NLR | Other-NLR |
| <i>Capsella bursa-pastoris</i> | Cbp9004  | NLR | TN        |
| <i>Capsella bursa-pastoris</i> | Cbp31978 | NLR | TN        |
| <i>Capsella bursa-pastoris</i> | Cbp52558 | NLR | TN        |
| <i>Capsella bursa-pastoris</i> | Cbp42205 | NLR | TN        |
| <i>Capsella bursa-pastoris</i> | Cbp24034 | NLR | TN        |
| <i>Capsella bursa-pastoris</i> | Cbp23373 | NLR | TN        |
| <i>Capsella bursa-pastoris</i> | Cbp22904 | NLR | TN        |
| <i>Capsella bursa-pastoris</i> | Cbp50210 | NLR | TN        |
| <i>Capsella bursa-pastoris</i> | Cbp47128 | NLR | TN        |
| <i>Capsella bursa-pastoris</i> | Cbp25833 | NLR | TN        |
| <i>Capsella bursa-pastoris</i> | Cbp3036  | NLR | TN        |
| <i>Capsella bursa-pastoris</i> | Cbp11459 | NLR | TN        |
| <i>Capsella bursa-pastoris</i> | Cbp47129 | NLR | TN        |
| <i>Capsella bursa-pastoris</i> | Cbp50211 | NLR | TN        |
| <i>Capsella bursa-pastoris</i> | Cbp42207 | NLR | TN        |
| <i>Capsella bursa-pastoris</i> | Cbp27624 | NLR | TN        |
| <i>Capsella bursa-pastoris</i> | Cbp42203 | NLR | TN        |
| <i>Capsella bursa-pastoris</i> | Cbp19430 | NLR | TN        |
| <i>Capsella bursa-pastoris</i> | Cbp47132 | NLR | TN        |
| <i>Capsella bursa-pastoris</i> | Cbp9005  | NLR | TN        |
| <i>Capsella bursa-pastoris</i> | Cbp8736  | NLR | TN        |
| <i>Capsella bursa-pastoris</i> | Cbp13366 | NLR | TN        |
| <i>Capsella bursa-pastoris</i> | Cbp16373 | NLR | TNL       |
| <i>Capsella bursa-pastoris</i> | Cbp26994 | NLR | TNL       |
| <i>Capsella bursa-pastoris</i> | Cbp52774 | NLR | TNL       |
| <i>Capsella bursa-pastoris</i> | Cbp12293 | NLR | TNL       |
| <i>Capsella bursa-pastoris</i> | Cbp11117 | NLR | TNL       |
| <i>Capsella bursa-pastoris</i> | Cbp9219  | NLR | TNL       |
| <i>Capsella bursa-pastoris</i> | Cbp7304  | NLR | TNL       |
| <i>Capsella bursa-pastoris</i> | Cbp13412 | NLR | TNL       |
| <i>Capsella bursa-pastoris</i> | Cbp13253 | NLR | TNL       |
| <i>Capsella bursa-pastoris</i> | Cbp49916 | NLR | TNL       |
| <i>Capsella bursa-pastoris</i> | Cbp49921 | NLR | TNL       |
| <i>Capsella bursa-pastoris</i> | Cbp4127  | NLR | TNL       |
| <i>Capsella bursa-pastoris</i> | Cbp26881 | NLR | TNL       |
| <i>Capsella bursa-pastoris</i> | Cbp2498  | NLR | TNL       |
| <i>Capsella bursa-pastoris</i> | Cbp34461 | NLR | TNL       |
| <i>Capsella bursa-pastoris</i> | Cbp10968 | NLR | TNL       |
| <i>Capsella bursa-pastoris</i> | Cbp49446 | NLR | TNL       |
| <i>Capsella bursa-pastoris</i> | Cbp34462 | NLR | TNL       |
| <i>Capsella bursa-pastoris</i> | Cbp45487 | NLR | TNL       |
| <i>Capsella bursa-pastoris</i> | Cbp38995 | NLR | TNL       |
| <i>Capsella bursa-pastoris</i> | Cbp39406 | NLR | TNL       |
| <i>Capsella bursa-pastoris</i> | Cbp13411 | NLR | TNL       |
| <i>Capsella bursa-pastoris</i> | Cbp11062 | NLR | TNL       |
| <i>Capsella bursa-pastoris</i> | Cbp26883 | NLR | TNL       |
| <i>Capsella bursa-pastoris</i> | Cbp44935 | NLR | TNL       |
| <i>Capsella bursa-pastoris</i> | Cbp26861 | NLR | TNL       |
| <i>Capsella bursa-pastoris</i> | Cbp52775 | NLR | TNL       |
| <i>Capsella bursa-pastoris</i> | Cbp11061 | NLR | TNL       |
| <i>Capsella bursa-pastoris</i> | Cbp19204 | NLR | TNL       |
| <i>Capsella bursa-pastoris</i> | Cbp13132 | NLR | TNL       |
| <i>Capsella bursa-pastoris</i> | Cbp29527 | NLR | TNL       |
| <i>Capsella bursa-pastoris</i> | Cbp48441 | NLR | TNL       |
| <i>Capsella bursa-pastoris</i> | Cbp12814 | NLR | TNL       |



|                                |          |     |     |
|--------------------------------|----------|-----|-----|
| <i>Capsella bursa-pastoris</i> | Cbp14179 | NLR | TNL |
| <i>Capsella bursa-pastoris</i> | Cbp14210 | NLR | TNL |
| <i>Capsella bursa-pastoris</i> | Cbp20745 | NLR | TNL |
| <i>Capsella bursa-pastoris</i> | Cbp27058 | NLR | TNL |
| <i>Capsella bursa-pastoris</i> | Cbp11527 | NLR | TNL |
| <i>Capsella bursa-pastoris</i> | Cbp9265  | NLR | TNL |
| <i>Capsella bursa-pastoris</i> | Cbp19432 | NLR | TNL |
| <i>Capsella bursa-pastoris</i> | Cbp10076 | NLR | TNL |
| <i>Capsella bursa-pastoris</i> | Cbp49899 | NLR | TNL |
| <i>Capsella bursa-pastoris</i> | Cbp45533 | NLR | TNL |
| <i>Capsella bursa-pastoris</i> | Cbp19206 | NLR | TNL |
| <i>Capsella bursa-pastoris</i> | Cbp13410 | NLR | TNL |
| <i>Capsella bursa-pastoris</i> | Cbp45527 | NLR | TNL |
| <i>Capsella bursa-pastoris</i> | Cbp43581 | NLR | TNL |
| <i>Capsella bursa-pastoris</i> | Cbp9286  | NLR | TNL |
| <i>Capsella bursa-pastoris</i> | Cbp50075 | NLR | TNL |
| <i>Capsella bursa-pastoris</i> | Cbp50215 | NLR | TNL |
| <i>Capsella bursa-pastoris</i> | Cbp36884 | NLR | TNL |
| <i>Capsella bursa-pastoris</i> | Cbp26447 | NLR | TNL |
| <i>Capsella bursa-pastoris</i> | Cbp13367 | NLR | TNL |
| <i>Capsella bursa-pastoris</i> | Cbp27040 | NLR | TNL |
| <i>Capsella bursa-pastoris</i> | Cbp34753 | NLR | TNL |
| <i>Capsella bursa-pastoris</i> | Cbp26884 | NLR | TNL |
| <i>Capsella bursa-pastoris</i> | Cbp27017 | NLR | TNL |
| <i>Capsella bursa-pastoris</i> | Cbp26860 | NLR | TNL |
| <i>Capsella bursa-pastoris</i> | Cbp11528 | NLR | TNL |
| <i>Capsella bursa-pastoris</i> | Cbp7866  | NLR | TNL |
| <i>Capsella bursa-pastoris</i> | Cbp45728 | NLR | TNL |
| <i>Capsella bursa-pastoris</i> | Cbp49279 | NLR | TNL |
| <i>Capsella bursa-pastoris</i> | Cbp47917 | NLR | TNL |
| <i>Capsella bursa-pastoris</i> | Cbp30618 | NLR | TNL |
| <i>Capsella bursa-pastoris</i> | Cbp19202 | NLR | TNL |
| <i>Capsella bursa-pastoris</i> | Cbp3371  | NLR | TNL |
| <i>Capsella bursa-pastoris</i> | Cbp7305  | NLR | TNL |
| <i>Capsella bursa-pastoris</i> | Cbp9251  | NLR | TNL |
| <i>Capsella bursa-pastoris</i> | Cbp11468 | NLR | TNL |
| <i>Capsella bursa-pastoris</i> | Cbp4476  | NLR | TNL |
| <i>Capsella bursa-pastoris</i> | Cbp8082  | NLR | TNL |
| <i>Capsella bursa-pastoris</i> | Cbp9970  | NLR | TNL |
| <i>Capsella bursa-pastoris</i> | Cbp10000 | NLR | TNL |
| <i>Capsella bursa-pastoris</i> | Cbp9263  | NLR | TNL |
| <i>Capsella bursa-pastoris</i> | Cbp34706 | NLR | TNL |
| <i>Capsella bursa-pastoris</i> | Cbp19163 | NLR | TNL |
| <i>Capsella bursa-pastoris</i> | Cbp19971 | NLR | TNL |
| <i>Capsella bursa-pastoris</i> | Cbp11064 | NLR | TNL |
| <i>Capsella bursa-pastoris</i> | Cbp47916 | NLR | TNL |
| <i>Capsella bursa-pastoris</i> | Cbp48776 | NLR | TNL |
| <i>Capsella bursa-pastoris</i> | Cbp11460 | NLR | TNL |
| <i>Capsella bursa-pastoris</i> | Cbp24904 | NLR | TNL |
| <i>Capsella bursa-pastoris</i> | Cbp19164 | NLR | TNL |
| <i>Capsella bursa-pastoris</i> | Cbp36899 | NLR | TNL |
| <i>Capsella bursa-pastoris</i> | Cbp49914 | NLR | TNL |
| <i>Capsella bursa-pastoris</i> | Cbp21984 | NLR | TNL |
| <i>Capsella bursa-pastoris</i> | Cbp51486 | NLR | TNL |
| <i>Capsella bursa-pastoris</i> | Cbp3372  | NLR | TNL |
| <i>Capsella bursa-pastoris</i> | Cbp39404 | NLR | TNL |
| <i>Capsella bursa-pastoris</i> | Cbp46000 | NLR | TNL |
| <i>Capsella bursa-pastoris</i> | Cbp35079 | NLR | TNL |
| <i>Capsella bursa-pastoris</i> | Cbp2517  | NLR | TNL |
| <i>Capsella bursa-pastoris</i> | Cbp27012 | NLR | TNL |
| <i>Capsella bursa-pastoris</i> | Cbp51101 | NLR | TNL |
| <i>Capsella bursa-pastoris</i> | Cbp42255 | NLR | TNL |

|                                |          |     |     |
|--------------------------------|----------|-----|-----|
| <i>Capsella bursa-pastoris</i> | Cbp19203 | NLR | TNL |
| <i>Capsella bursa-pastoris</i> | Cbp48777 | NLR | TNL |
| <i>Capsella bursa-pastoris</i> | Cbp45499 | NLR | TNL |
| <i>Capsella bursa-pastoris</i> | Cbp12437 | NLR | TNL |
| <i>Capsella bursa-pastoris</i> | Cbp33418 | NLR | TNL |
| <i>Capsella bursa-pastoris</i> | Cbp49922 | NLR | TNL |
| <i>Capsella bursa-pastoris</i> | Cbp34755 | NLR | TNL |
| <i>Capsella bursa-pastoris</i> | Cbp26887 | NLR | TNL |
| <i>Capsella bursa-pastoris</i> | Cbp1593  | NLR | TNL |
| <i>Capsella bursa-pastoris</i> | Cbp1642  | NLR | TNL |
| <i>Capsella bursa-pastoris</i> | Cbp33420 | NLR | TNL |
| <i>Capsella bursa-pastoris</i> | Cbp52985 | NLR | TNL |
| <i>Capsella bursa-pastoris</i> | Cbp26865 | NLR | TX  |
| <i>Capsella bursa-pastoris</i> | Cbp45498 | NLR | TX  |
| <i>Capsella bursa-pastoris</i> | Cbp44288 | NLR | TX  |
| <i>Capsella bursa-pastoris</i> | Cbp46734 | NLR | TX  |
| <i>Capsella bursa-pastoris</i> | Cbp35994 | NLR | TX  |
| <i>Capsella bursa-pastoris</i> | Cbp16413 | NLR | TX  |
| <i>Capsella bursa-pastoris</i> | Cbp39986 | NLR | TX  |
| <i>Capsella bursa-pastoris</i> | Cbp44287 | NLR | TX  |
| <i>Capsella bursa-pastoris</i> | Cbp44283 | NLR | TX  |
| <i>Capsella bursa-pastoris</i> | Cbp46730 | NLR | TX  |
| <i>Capsella bursa-pastoris</i> | Cbp44284 | NLR | TX  |
| <i>Capsella bursa-pastoris</i> | Cbp34955 | NLR | TX  |
| <i>Capsella bursa-pastoris</i> | Cbp25840 | NLR | TX  |
| <i>Capsella bursa-pastoris</i> | Cbp26866 | NLR | TX  |
| <i>Capsella bursa-pastoris</i> | Cbp22180 | NLR | TX  |
| <i>Capsella bursa-pastoris</i> | Cbp1671  | NLR | TX  |
| <i>Capsella bursa-pastoris</i> | Cbp44278 | NLR | TX  |
| <i>Capsella bursa-pastoris</i> | Cbp8728  | NLR | TX  |
| <i>Capsella bursa-pastoris</i> | Cbp41699 | NLR | TX  |
| <i>Capsella bursa-pastoris</i> | Cbp45523 | NLR | TX  |
| <i>Capsella bursa-pastoris</i> | Cbp13408 | NLR | TX  |
| <i>Capsella bursa-pastoris</i> | Cbp45520 | NLR | TX  |
| <i>Capsella bursa-pastoris</i> | Cbp26898 | NLR | TX  |
| <i>Capsella bursa-pastoris</i> | Cbp26864 | NLR | TX  |
| <i>Capsella bursa-pastoris</i> | Cbp13338 | NLR | TX  |
| <i>Capsella bursa-pastoris</i> | Cbp26841 | NLR | TX  |
| <i>Capsella bursa-pastoris</i> | Cbp45529 | NLR | TX  |
| <i>Capsella bursa-pastoris</i> | Cbp48438 | NLR | TX  |
| <i>Capsella bursa-pastoris</i> | Cbp47135 | NLR | TX  |
| <i>Capsella bursa-pastoris</i> | Cbp46731 | NLR | TX  |
| <i>Capsella bursa-pastoris</i> | Cbp26882 | NLR | TX  |
| <i>Capsella bursa-pastoris</i> | Cbp9003  | NLR | TX  |
| <i>Capsella bursa-pastoris</i> | Cbp25967 | NLR | TX  |
| <i>Capsella bursa-pastoris</i> | Cbp45484 | NLR | TX  |
| <i>Capsella bursa-pastoris</i> | Cbp13418 | NLR | TX  |
| <i>Capsella bursa-pastoris</i> | Cbp9006  | NLR | TX  |
| <i>Capsella bursa-pastoris</i> | Cbp13336 | NLR | TX  |
| <i>Capsella bursa-pastoris</i> | Cbp1643  | NLR | TX  |
| <i>Capsella bursa-pastoris</i> | Cbp8727  | NLR | TX  |
| <i>Capsella bursa-pastoris</i> | Cbp9007  | NLR | TX  |
| <i>Capsella bursa-pastoris</i> | Cbp45046 | NLR | TX  |
| <i>Capsella bursa-pastoris</i> | Cbp52902 | NLR | TX  |
| <i>Capsella bursa-pastoris</i> | Cbp45521 | NLR | TX  |
| <i>Capsella bursa-pastoris</i> | Cbp25841 | NLR | TX  |
| <i>Capsella bursa-pastoris</i> | Cbp33699 | NLR | TX  |
| <i>Capsella bursa-pastoris</i> | Cbp46928 | NLR | TX  |
| <i>Capsella bursa-pastoris</i> | Cbp33449 | NLR | TX  |
| <i>Capsella bursa-pastoris</i> | Cbp46736 | NLR | TX  |
| <i>Capsella bursa-pastoris</i> | Cbp46301 | NLR | TX  |
| <i>Capsella bursa-pastoris</i> | Cbp46732 | NLR | TX  |

|                                |          |     |           |
|--------------------------------|----------|-----|-----------|
| <i>Capsella bursa-pastoris</i> | Cbp44281 | NLR | TX        |
| <i>Capsella bursa-pastoris</i> | Cbp44286 | NLR | TX        |
| <i>Capsella bursa-pastoris</i> | Cbp32710 | NLR | TX        |
| <i>Capsella bursa-pastoris</i> | Cbp39398 | NLR | TX        |
| <i>Capsella bursa-pastoris</i> | Cbp33451 | NLR | TX        |
| <i>Capsella bursa-pastoris</i> | Cbp18474 | NLR | TX        |
| <i>Capsella bursa-pastoris</i> | Cbp39109 | NLR | TX        |
| <i>Capsella bursa-pastoris</i> | Cbp9252  | NLR | TX        |
| <i>Capsella bursa-pastoris</i> | Cbp14326 | NLR | TX        |
| <i>Capsella bursa-pastoris</i> | Cbp46733 | NLR | TX        |
| <i>Capsella bursa-pastoris</i> | Cbp8729  | NLR | TX        |
| <i>Capsella bursa-pastoris</i> | Cbp32921 | NLR | TX        |
| <i>Capsella bursa-pastoris</i> | Cbp8893  | NLR | TX        |
| <i>Capsella bursa-pastoris</i> | Cbp16414 | NLR | TX        |
| <i>Capsella bursa-pastoris</i> | Cbp45525 | NLR | TX        |
| <i>Capsella bursa-pastoris</i> | Cbp46737 | NLR | TX        |
| <i>Capsella bursa-pastoris</i> | Cbp45530 | NLR | TX        |
| <i>Capsella bursa-pastoris</i> | Cbp44282 | NLR | TX        |
| <i>Capsella bursa-pastoris</i> | Cbp33445 | NLR | TX        |
| <i>Capsella bursa-pastoris</i> | Cbp26888 | NLR | TX        |
| <i>Capsella bursa-pastoris</i> | Cbp4608  | NLR | TX        |
| <i>Capsella bursa-pastoris</i> | Cbp20141 | NLR | TX        |
| <i>Capsella bursa-pastoris</i> | Cbp42204 | NLR | TX        |
| <i>Capsella bursa-pastoris</i> | Cbp22181 | NLR | TX        |
| <i>Capsella bursa-pastoris</i> | Cbp27954 | NLR | TX        |
| <i>Capsella bursa-pastoris</i> | Cbp45524 | NLR | TX        |
| <i>Capsella bursa-pastoris</i> | Cbp10021 | RLK | LRR       |
| <i>Capsella bursa-pastoris</i> | Cbp10081 | RLK | LRR       |
| <i>Capsella bursa-pastoris</i> | Cbp10104 | RLK | LRR       |
| <i>Capsella bursa-pastoris</i> | Cbp10122 | RLK | LRR       |
| <i>Capsella bursa-pastoris</i> | Cbp10139 | RLK | Lysm      |
| <i>Capsella bursa-pastoris</i> | Cbp10167 | RLK | Other-RLK |
| <i>Capsella bursa-pastoris</i> | Cbp10218 | RLK | LRR       |
| <i>Capsella bursa-pastoris</i> | Cbp10282 | RLK | LRR       |
| <i>Capsella bursa-pastoris</i> | Cbp10649 | RLK | Other-RLK |
| <i>Capsella bursa-pastoris</i> | Cbp10679 | RLK | Other-RLK |
| <i>Capsella bursa-pastoris</i> | Cbp10686 | RLK | Other-RLK |
| <i>Capsella bursa-pastoris</i> | Cbp10688 | RLK | LRR       |
| <i>Capsella bursa-pastoris</i> | Cbp10723 | RLK | Other-RLK |
| <i>Capsella bursa-pastoris</i> | Cbp10791 | RLK | Other-RLK |
| <i>Capsella bursa-pastoris</i> | Cbp10858 | RLK | LRR       |
| <i>Capsella bursa-pastoris</i> | Cbp1094  | RLK | Other-RLK |
| <i>Capsella bursa-pastoris</i> | Cbp11040 | RLK | LRR       |
| <i>Capsella bursa-pastoris</i> | Cbp11126 | RLK | Other-RLK |
| <i>Capsella bursa-pastoris</i> | Cbp11226 | RLK | Other-RLK |
| <i>Capsella bursa-pastoris</i> | Cbp11252 | RLK | Other-RLK |
| <i>Capsella bursa-pastoris</i> | Cbp1129  | RLK | LRR       |
| <i>Capsella bursa-pastoris</i> | Cbp11317 | RLK | Other-RLK |
| <i>Capsella bursa-pastoris</i> | Cbp11357 | RLK | Other-RLK |
| <i>Capsella bursa-pastoris</i> | Cbp11359 | RLK | Other-RLK |
| <i>Capsella bursa-pastoris</i> | Cbp11374 | RLK | Other-RLK |
| <i>Capsella bursa-pastoris</i> | Cbp116   | RLK | LRR       |
| <i>Capsella bursa-pastoris</i> | Cbp11612 | RLK | Other-RLK |
| <i>Capsella bursa-pastoris</i> | Cbp11614 | RLK | Other-RLK |
| <i>Capsella bursa-pastoris</i> | Cbp11615 | RLK | Other-RLK |
| <i>Capsella bursa-pastoris</i> | Cbp11616 | RLK | Other-RLK |
| <i>Capsella bursa-pastoris</i> | Cbp11659 | RLK | Other-RLK |
| <i>Capsella bursa-pastoris</i> | Cbp11660 | RLK | Other-RLK |
| <i>Capsella bursa-pastoris</i> | Cbp11706 | RLK | Other-RLK |
| <i>Capsella bursa-pastoris</i> | Cbp11710 | RLK | LRR       |
| <i>Capsella bursa-pastoris</i> | Cbp11712 | RLK | LRR       |
| <i>Capsella bursa-pastoris</i> | Cbp11713 | RLK | Other-RLK |

|                                |          |     |           |
|--------------------------------|----------|-----|-----------|
| <i>Capsella bursa-pastoris</i> | Cbp11769 | RLK | LRR       |
| <i>Capsella bursa-pastoris</i> | Cbp11798 | RLK | LRR       |
| <i>Capsella bursa-pastoris</i> | Cbp11800 | RLK | LRR       |
| <i>Capsella bursa-pastoris</i> | Cbp11801 | RLK | LRR       |
| <i>Capsella bursa-pastoris</i> | Cbp12005 | RLK | LRR       |
| <i>Capsella bursa-pastoris</i> | Cbp1204  | RLK | Other-RLK |
| <i>Capsella bursa-pastoris</i> | Cbp12040 | RLK | Other-RLK |
| <i>Capsella bursa-pastoris</i> | Cbp12059 | RLK | LRR       |
| <i>Capsella bursa-pastoris</i> | Cbp1210  | RLK | Other-RLK |
| <i>Capsella bursa-pastoris</i> | Cbp1211  | RLK | Other-RLK |
| <i>Capsella bursa-pastoris</i> | Cbp1212  | RLK | Other-RLK |
| <i>Capsella bursa-pastoris</i> | Cbp12172 | RLK | Other-RLK |
| <i>Capsella bursa-pastoris</i> | Cbp12185 | RLK | LRR       |
| <i>Capsella bursa-pastoris</i> | Cbp12446 | RLK | Other-RLK |
| <i>Capsella bursa-pastoris</i> | Cbp12447 | RLK | Other-RLK |
| <i>Capsella bursa-pastoris</i> | Cbp1246  | RLK | Other-RLK |
| <i>Capsella bursa-pastoris</i> | Cbp12496 | RLK | Other-RLK |
| <i>Capsella bursa-pastoris</i> | Cbp12609 | RLK | Other-RLK |
| <i>Capsella bursa-pastoris</i> | Cbp12626 | RLK | LRR       |
| <i>Capsella bursa-pastoris</i> | Cbp1269  | RLK | LRR       |
| <i>Capsella bursa-pastoris</i> | Cbp12713 | RLK | Other-RLK |
| <i>Capsella bursa-pastoris</i> | Cbp12807 | RLK | LRR       |
| <i>Capsella bursa-pastoris</i> | Cbp12878 | RLK | LRR       |
| <i>Capsella bursa-pastoris</i> | Cbp12883 | RLK | Other-RLK |
| <i>Capsella bursa-pastoris</i> | Cbp1290  | RLK | Other-RLK |
| <i>Capsella bursa-pastoris</i> | Cbp12946 | RLK | Other-RLK |
| <i>Capsella bursa-pastoris</i> | Cbp13044 | RLK | Other-RLK |
| <i>Capsella bursa-pastoris</i> | Cbp13171 | RLK | Other-RLK |
| <i>Capsella bursa-pastoris</i> | Cbp13180 | RLK | LRR       |
| <i>Capsella bursa-pastoris</i> | Cbp13318 | RLK | Other-RLK |
| <i>Capsella bursa-pastoris</i> | Cbp13378 | RLK | Other-RLK |
| <i>Capsella bursa-pastoris</i> | Cbp13489 | RLK | Other-RLK |
| <i>Capsella bursa-pastoris</i> | Cbp13589 | RLK | Other-RLK |
| <i>Capsella bursa-pastoris</i> | Cbp13711 | RLK | LRR       |
| <i>Capsella bursa-pastoris</i> | Cbp13720 | RLK | Other-RLK |
| <i>Capsella bursa-pastoris</i> | Cbp13722 | RLK | Other-RLK |
| <i>Capsella bursa-pastoris</i> | Cbp13751 | RLK | LRR       |
| <i>Capsella bursa-pastoris</i> | Cbp13789 | RLK | Other-RLK |
| <i>Capsella bursa-pastoris</i> | Cbp13820 | RLK | Other-RLK |
| <i>Capsella bursa-pastoris</i> | Cbp13885 | RLK | Other-RLK |
| <i>Capsella bursa-pastoris</i> | Cbp13969 | RLK | LRR       |
| <i>Capsella bursa-pastoris</i> | Cbp14006 | RLK | LRR       |
| <i>Capsella bursa-pastoris</i> | Cbp14007 | RLK | LRR       |
| <i>Capsella bursa-pastoris</i> | Cbp1409  | RLK | Other-RLK |
| <i>Capsella bursa-pastoris</i> | Cbp14140 | RLK | LRR       |
| <i>Capsella bursa-pastoris</i> | Cbp14207 | RLK | Other-RLK |
| <i>Capsella bursa-pastoris</i> | Cbp14212 | RLK | LRR       |
| <i>Capsella bursa-pastoris</i> | Cbp1432  | RLK | Other-RLK |
| <i>Capsella bursa-pastoris</i> | Cbp14427 | RLK | LRR       |
| <i>Capsella bursa-pastoris</i> | Cbp14454 | RLK | LRR       |
| <i>Capsella bursa-pastoris</i> | Cbp14461 | RLK | Other-RLK |
| <i>Capsella bursa-pastoris</i> | Cbp14471 | RLK | Other-RLK |
| <i>Capsella bursa-pastoris</i> | Cbp14518 | RLK | Other-RLK |
| <i>Capsella bursa-pastoris</i> | Cbp1459  | RLK | Other-RLK |
| <i>Capsella bursa-pastoris</i> | Cbp14633 | RLK | LRR       |
| <i>Capsella bursa-pastoris</i> | Cbp14650 | RLK | LRR       |
| <i>Capsella bursa-pastoris</i> | Cbp1477  | RLK | Other-RLK |
| <i>Capsella bursa-pastoris</i> | Cbp1478  | RLK | Other-RLK |
| <i>Capsella bursa-pastoris</i> | Cbp1479  | RLK | Other-RLK |
| <i>Capsella bursa-pastoris</i> | Cbp1480  | RLK | Other-RLK |
| <i>Capsella bursa-pastoris</i> | Cbp1481  | RLK | Other-RLK |
| <i>Capsella bursa-pastoris</i> | Cbp1482  | RLK | Other-RLK |

|                                |          |     |           |
|--------------------------------|----------|-----|-----------|
| <i>Capsella bursa-pastoris</i> | Cbp1485  | RLK | Other-RLK |
| <i>Capsella bursa-pastoris</i> | Cbp1486  | RLK | Other-RLK |
| <i>Capsella bursa-pastoris</i> | Cbp1487  | RLK | Other-RLK |
| <i>Capsella bursa-pastoris</i> | Cbp1488  | RLK | Other-RLK |
| <i>Capsella bursa-pastoris</i> | Cbp1489  | RLK | Other-RLK |
| <i>Capsella bursa-pastoris</i> | Cbp14892 | RLK | Other-RLK |
| <i>Capsella bursa-pastoris</i> | Cbp14995 | RLK | Other-RLK |
| <i>Capsella bursa-pastoris</i> | Cbp15039 | RLK | Other-RLK |
| <i>Capsella bursa-pastoris</i> | Cbp15040 | RLK | Other-RLK |
| <i>Capsella bursa-pastoris</i> | Cbp15058 | RLK | Other-RLK |
| <i>Capsella bursa-pastoris</i> | Cbp15219 | RLK | Other-RLK |
| <i>Capsella bursa-pastoris</i> | Cbp15427 | RLK | Other-RLK |
| <i>Capsella bursa-pastoris</i> | Cbp15461 | RLK | Other-RLK |
| <i>Capsella bursa-pastoris</i> | Cbp15487 | RLK | LRR       |
| <i>Capsella bursa-pastoris</i> | Cbp15624 | RLK | LRR       |
| <i>Capsella bursa-pastoris</i> | Cbp15710 | RLK | LRR       |
| <i>Capsella bursa-pastoris</i> | Cbp15738 | RLK | Other-RLK |
| <i>Capsella bursa-pastoris</i> | Cbp1604  | RLK | Other-RLK |
| <i>Capsella bursa-pastoris</i> | Cbp1605  | RLK | Other-RLK |
| <i>Capsella bursa-pastoris</i> | Cbp16052 | RLK | Other-RLK |
| <i>Capsella bursa-pastoris</i> | Cbp16115 | RLK | Other-RLK |
| <i>Capsella bursa-pastoris</i> | Cbp16116 | RLK | Other-RLK |
| <i>Capsella bursa-pastoris</i> | Cbp16117 | RLK | Other-RLK |
| <i>Capsella bursa-pastoris</i> | Cbp16130 | RLK | Other-RLK |
| <i>Capsella bursa-pastoris</i> | Cbp16263 | RLK | Other-RLK |
| <i>Capsella bursa-pastoris</i> | Cbp16300 | RLK | LRR       |
| <i>Capsella bursa-pastoris</i> | Cbp16305 | RLK | Other-RLK |
| <i>Capsella bursa-pastoris</i> | Cbp16496 | RLK | Other-RLK |
| <i>Capsella bursa-pastoris</i> | Cbp165   | RLK | LRR       |
| <i>Capsella bursa-pastoris</i> | Cbp1651  | RLK | Other-RLK |
| <i>Capsella bursa-pastoris</i> | Cbp1652  | RLK | Other-RLK |
| <i>Capsella bursa-pastoris</i> | Cbp1655  | RLK | Other-RLK |
| <i>Capsella bursa-pastoris</i> | Cbp16622 | RLK | LRR       |
| <i>Capsella bursa-pastoris</i> | Cbp16810 | RLK | Other-RLK |
| <i>Capsella bursa-pastoris</i> | Cbp16811 | RLK | Other-RLK |
| <i>Capsella bursa-pastoris</i> | Cbp16813 | RLK | Other-RLK |
| <i>Capsella bursa-pastoris</i> | Cbp17212 | RLK | LRR       |
| <i>Capsella bursa-pastoris</i> | Cbp17348 | RLK | Other-RLK |
| <i>Capsella bursa-pastoris</i> | Cbp17356 | RLK | LRR       |
| <i>Capsella bursa-pastoris</i> | Cbp17369 | RLK | LRR       |
| <i>Capsella bursa-pastoris</i> | Cbp17370 | RLK | LRR       |
| <i>Capsella bursa-pastoris</i> | Cbp17381 | RLK | Other-RLK |
| <i>Capsella bursa-pastoris</i> | Cbp17386 | RLK | LRR       |
| <i>Capsella bursa-pastoris</i> | Cbp17397 | RLK | LRR       |
| <i>Capsella bursa-pastoris</i> | Cbp17427 | RLK | Other-RLK |
| <i>Capsella bursa-pastoris</i> | Cbp17510 | RLK | LRR       |
| <i>Capsella bursa-pastoris</i> | Cbp17726 | RLK | Other-RLK |
| <i>Capsella bursa-pastoris</i> | Cbp17786 | RLK | Other-RLK |
| <i>Capsella bursa-pastoris</i> | Cbp17936 | RLK | LRR       |
| <i>Capsella bursa-pastoris</i> | Cbp18066 | RLK | Other-RLK |
| <i>Capsella bursa-pastoris</i> | Cbp18087 | RLK | LRR       |
| <i>Capsella bursa-pastoris</i> | Cbp18264 | RLK | Other-RLK |
| <i>Capsella bursa-pastoris</i> | Cbp18353 | RLK | LRR       |
| <i>Capsella bursa-pastoris</i> | Cbp18355 | RLK | Other-RLK |
| <i>Capsella bursa-pastoris</i> | Cbp1836  | RLK | LRR       |
| <i>Capsella bursa-pastoris</i> | Cbp18362 | RLK | Other-RLK |
| <i>Capsella bursa-pastoris</i> | Cbp18394 | RLK | Other-RLK |
| <i>Capsella bursa-pastoris</i> | Cbp18547 | RLK | Other-RLK |
| <i>Capsella bursa-pastoris</i> | Cbp18549 | RLK | Other-RLK |
| <i>Capsella bursa-pastoris</i> | Cbp18595 | RLK | LRR       |
| <i>Capsella bursa-pastoris</i> | Cbp18613 | RLK | LRR       |
| <i>Capsella bursa-pastoris</i> | Cbp18614 | RLK | LRR       |

|                                |          |     |           |
|--------------------------------|----------|-----|-----------|
| <i>Capsella bursa-pastoris</i> | Cbp18714 | RLK | LRR       |
| <i>Capsella bursa-pastoris</i> | Cbp18738 | RLK | LRR       |
| <i>Capsella bursa-pastoris</i> | Cbp18745 | RLK | Other-RLK |
| <i>Capsella bursa-pastoris</i> | Cbp18755 | RLK | Other-RLK |
| <i>Capsella bursa-pastoris</i> | Cbp18924 | RLK | LRR       |
| <i>Capsella bursa-pastoris</i> | Cbp18943 | RLK | Other-RLK |
| <i>Capsella bursa-pastoris</i> | Cbp18973 | RLK | Other-RLK |
| <i>Capsella bursa-pastoris</i> | Cbp19117 | RLK | Other-RLK |
| <i>Capsella bursa-pastoris</i> | Cbp19174 | RLK | Other-RLK |
| <i>Capsella bursa-pastoris</i> | Cbp19243 | RLK | LRR       |
| <i>Capsella bursa-pastoris</i> | Cbp1926  | RLK | Other-RLK |
| <i>Capsella bursa-pastoris</i> | Cbp19268 | RLK | LRR       |
| <i>Capsella bursa-pastoris</i> | Cbp19332 | RLK | LRR       |
| <i>Capsella bursa-pastoris</i> | Cbp19342 | RLK | Other-RLK |
| <i>Capsella bursa-pastoris</i> | Cbp19459 | RLK | LRR       |
| <i>Capsella bursa-pastoris</i> | Cbp19503 | RLK | LRR       |
| <i>Capsella bursa-pastoris</i> | Cbp19547 | RLK | Other-RLK |
| <i>Capsella bursa-pastoris</i> | Cbp19637 | RLK | Other-RLK |
| <i>Capsella bursa-pastoris</i> | Cbp19642 | RLK | Other-RLK |
| <i>Capsella bursa-pastoris</i> | Cbp19643 | RLK | Other-RLK |
| <i>Capsella bursa-pastoris</i> | Cbp19780 | RLK | LRR       |
| <i>Capsella bursa-pastoris</i> | Cbp19878 | RLK | LRR       |
| <i>Capsella bursa-pastoris</i> | Cbp19964 | RLK | LRR       |
| <i>Capsella bursa-pastoris</i> | Cbp20139 | RLK | LRR       |
| <i>Capsella bursa-pastoris</i> | Cbp20232 | RLK | LRR       |
| <i>Capsella bursa-pastoris</i> | Cbp2052  | RLK | LRR       |
| <i>Capsella bursa-pastoris</i> | Cbp20587 | RLK | LRR       |
| <i>Capsella bursa-pastoris</i> | Cbp20620 | RLK | LRR       |
| <i>Capsella bursa-pastoris</i> | Cbp20654 | RLK | LRR       |
| <i>Capsella bursa-pastoris</i> | Cbp20890 | RLK | Other-RLK |
| <i>Capsella bursa-pastoris</i> | Cbp20914 | RLK | Other-RLK |
| <i>Capsella bursa-pastoris</i> | Cbp20915 | RLK | Other-RLK |
| <i>Capsella bursa-pastoris</i> | Cbp20939 | RLK | LRR       |
| <i>Capsella bursa-pastoris</i> | Cbp21084 | RLK | LRR       |
| <i>Capsella bursa-pastoris</i> | Cbp21226 | RLK | LRR       |
| <i>Capsella bursa-pastoris</i> | Cbp2151  | RLK | LRR       |
| <i>Capsella bursa-pastoris</i> | Cbp21514 | RLK | LRR       |
| <i>Capsella bursa-pastoris</i> | Cbp21603 | RLK | LRR       |
| <i>Capsella bursa-pastoris</i> | Cbp21604 | RLK | LRR       |
| <i>Capsella bursa-pastoris</i> | Cbp21605 | RLK | LRR       |
| <i>Capsella bursa-pastoris</i> | Cbp21653 | RLK | Other-RLK |
| <i>Capsella bursa-pastoris</i> | Cbp21682 | RLK | Other-RLK |
| <i>Capsella bursa-pastoris</i> | Cbp21768 | RLK | LRR       |
| <i>Capsella bursa-pastoris</i> | Cbp21919 | RLK | LRR       |
| <i>Capsella bursa-pastoris</i> | Cbp22009 | RLK | Other-RLK |
| <i>Capsella bursa-pastoris</i> | Cbp22033 | RLK | Other-RLK |
| <i>Capsella bursa-pastoris</i> | Cbp22074 | RLK | LRR       |
| <i>Capsella bursa-pastoris</i> | Cbp22078 | RLK | Other-RLK |
| <i>Capsella bursa-pastoris</i> | Cbp22202 | RLK | LRR       |
| <i>Capsella bursa-pastoris</i> | Cbp22231 | RLK | Other-RLK |
| <i>Capsella bursa-pastoris</i> | Cbp22239 | RLK | LRR       |
| <i>Capsella bursa-pastoris</i> | Cbp22252 | RLK | Other-RLK |
| <i>Capsella bursa-pastoris</i> | Cbp22339 | RLK | Other-RLK |
| <i>Capsella bursa-pastoris</i> | Cbp22340 | RLK | Other-RLK |
| <i>Capsella bursa-pastoris</i> | Cbp22341 | RLK | Other-RLK |
| <i>Capsella bursa-pastoris</i> | Cbp22342 | RLK | Other-RLK |
| <i>Capsella bursa-pastoris</i> | Cbp22397 | RLK | Other-RLK |
| <i>Capsella bursa-pastoris</i> | Cbp22398 | RLK | LRR       |
| <i>Capsella bursa-pastoris</i> | Cbp22399 | RLK | LRR       |
| <i>Capsella bursa-pastoris</i> | Cbp22400 | RLK | LRR       |
| <i>Capsella bursa-pastoris</i> | Cbp22456 | RLK | Other-RLK |
| <i>Capsella bursa-pastoris</i> | Cbp22534 | RLK | Other-RLK |

|                                |          |     |           |
|--------------------------------|----------|-----|-----------|
| <i>Capsella bursa-pastoris</i> | Cbp22619 | RLK | Other-RLK |
| <i>Capsella bursa-pastoris</i> | Cbp2262  | RLK | Other-RLK |
| <i>Capsella bursa-pastoris</i> | Cbp22669 | RLK | Other-RLK |
| <i>Capsella bursa-pastoris</i> | Cbp22678 | RLK | LRR       |
| <i>Capsella bursa-pastoris</i> | Cbp22814 | RLK | Other-RLK |
| <i>Capsella bursa-pastoris</i> | Cbp22874 | RLK | Other-RLK |
| <i>Capsella bursa-pastoris</i> | Cbp22962 | RLK | Other-RLK |
| <i>Capsella bursa-pastoris</i> | Cbp23106 | RLK | LRR       |
| <i>Capsella bursa-pastoris</i> | Cbp23247 | RLK | Other-RLK |
| <i>Capsella bursa-pastoris</i> | Cbp23248 | RLK | Other-RLK |
| <i>Capsella bursa-pastoris</i> | Cbp23249 | RLK | Other-RLK |
| <i>Capsella bursa-pastoris</i> | Cbp23257 | RLK | Other-RLK |
| <i>Capsella bursa-pastoris</i> | Cbp23342 | RLK | LRR       |
| <i>Capsella bursa-pastoris</i> | Cbp23367 | RLK | Other-RLK |
| <i>Capsella bursa-pastoris</i> | Cbp23385 | RLK | LRR       |
| <i>Capsella bursa-pastoris</i> | Cbp23413 | RLK | Other-RLK |
| <i>Capsella bursa-pastoris</i> | Cbp23431 | RLK | Other-RLK |
| <i>Capsella bursa-pastoris</i> | Cbp23492 | RLK | Other-RLK |
| <i>Capsella bursa-pastoris</i> | Cbp23580 | RLK | Other-RLK |
| <i>Capsella bursa-pastoris</i> | Cbp23611 | RLK | LRR       |
| <i>Capsella bursa-pastoris</i> | Cbp23644 | RLK | LRR       |
| <i>Capsella bursa-pastoris</i> | Cbp23752 | RLK | Other-RLK |
| <i>Capsella bursa-pastoris</i> | Cbp2376  | RLK | Other-RLK |
| <i>Capsella bursa-pastoris</i> | Cbp23885 | RLK | Other-RLK |
| <i>Capsella bursa-pastoris</i> | Cbp23912 | RLK | Other-RLK |
| <i>Capsella bursa-pastoris</i> | Cbp23973 | RLK | Other-RLK |
| <i>Capsella bursa-pastoris</i> | Cbp2399  | RLK | Other-RLK |
| <i>Capsella bursa-pastoris</i> | Cbp24023 | RLK | LRR       |
| <i>Capsella bursa-pastoris</i> | Cbp24040 | RLK | Other-RLK |
| <i>Capsella bursa-pastoris</i> | Cbp24065 | RLK | LRR       |
| <i>Capsella bursa-pastoris</i> | Cbp24175 | RLK | LRR       |
| <i>Capsella bursa-pastoris</i> | Cbp24192 | RLK | LRR       |
| <i>Capsella bursa-pastoris</i> | Cbp24274 | RLK | LRR       |
| <i>Capsella bursa-pastoris</i> | Cbp24330 | RLK | LRR       |
| <i>Capsella bursa-pastoris</i> | Cbp24393 | RLK | Other-RLK |
| <i>Capsella bursa-pastoris</i> | Cbp24402 | RLK | LRR       |
| <i>Capsella bursa-pastoris</i> | Cbp24415 | RLK | Other-RLK |
| <i>Capsella bursa-pastoris</i> | Cbp24442 | RLK | Other-RLK |
| <i>Capsella bursa-pastoris</i> | Cbp24527 | RLK | LRR       |
| <i>Capsella bursa-pastoris</i> | Cbp24528 | RLK | LRR       |
| <i>Capsella bursa-pastoris</i> | Cbp24531 | RLK | LRR       |
| <i>Capsella bursa-pastoris</i> | Cbp24579 | RLK | Other-RLK |
| <i>Capsella bursa-pastoris</i> | Cbp24597 | RLK | LRR       |
| <i>Capsella bursa-pastoris</i> | Cbp24659 | RLK | LRR       |
| <i>Capsella bursa-pastoris</i> | Cbp24732 | RLK | LRR       |
| <i>Capsella bursa-pastoris</i> | Cbp24880 | RLK | Other-RLK |
| <i>Capsella bursa-pastoris</i> | Cbp25037 | RLK | LRR       |
| <i>Capsella bursa-pastoris</i> | Cbp2522  | RLK | LRR       |
| <i>Capsella bursa-pastoris</i> | Cbp25330 | RLK | LRR       |
| <i>Capsella bursa-pastoris</i> | Cbp25386 | RLK | Other-RLK |
| <i>Capsella bursa-pastoris</i> | Cbp2543  | RLK | LRR       |
| <i>Capsella bursa-pastoris</i> | Cbp25509 | RLK | Other-RLK |
| <i>Capsella bursa-pastoris</i> | Cbp25582 | RLK | LRR       |
| <i>Capsella bursa-pastoris</i> | Cbp25638 | RLK | Other-RLK |
| <i>Capsella bursa-pastoris</i> | Cbp25658 | RLK | Other-RLK |
| <i>Capsella bursa-pastoris</i> | Cbp25664 | RLK | LRR       |
| <i>Capsella bursa-pastoris</i> | Cbp25671 | RLK | Other-RLK |
| <i>Capsella bursa-pastoris</i> | Cbp25702 | RLK | Other-RLK |
| <i>Capsella bursa-pastoris</i> | Cbp25766 | RLK | LRR       |
| <i>Capsella bursa-pastoris</i> | Cbp2579  | RLK | Lysm      |
| <i>Capsella bursa-pastoris</i> | Cbp25808 | RLK | LRR       |
| <i>Capsella bursa-pastoris</i> | Cbp25853 | RLK | Other-RLK |

|                                |          |     |           |
|--------------------------------|----------|-----|-----------|
| <i>Capsella bursa-pastoris</i> | Cbp25854 | RLK | Other-RLK |
| <i>Capsella bursa-pastoris</i> | Cbp25855 | RLK | Other-RLK |
| <i>Capsella bursa-pastoris</i> | Cbp25856 | RLK | Other-RLK |
| <i>Capsella bursa-pastoris</i> | Cbp25861 | RLK | Other-RLK |
| <i>Capsella bursa-pastoris</i> | Cbp25862 | RLK | Other-RLK |
| <i>Capsella bursa-pastoris</i> | Cbp25863 | RLK | Other-RLK |
| <i>Capsella bursa-pastoris</i> | Cbp25864 | RLK | Other-RLK |
| <i>Capsella bursa-pastoris</i> | Cbp25865 | RLK | Other-RLK |
| <i>Capsella bursa-pastoris</i> | Cbp25866 | RLK | Other-RLK |
| <i>Capsella bursa-pastoris</i> | Cbp25867 | RLK | Other-RLK |
| <i>Capsella bursa-pastoris</i> | Cbp25868 | RLK | Other-RLK |
| <i>Capsella bursa-pastoris</i> | Cbp25870 | RLK | Other-RLK |
| <i>Capsella bursa-pastoris</i> | Cbp25871 | RLK | Other-RLK |
| <i>Capsella bursa-pastoris</i> | Cbp25872 | RLK | Other-RLK |
| <i>Capsella bursa-pastoris</i> | Cbp25873 | RLK | Other-RLK |
| <i>Capsella bursa-pastoris</i> | Cbp25874 | RLK | Other-RLK |
| <i>Capsella bursa-pastoris</i> | Cbp25903 | RLK | Other-RLK |
| <i>Capsella bursa-pastoris</i> | Cbp26024 | RLK | Other-RLK |
| <i>Capsella bursa-pastoris</i> | Cbp2604  | RLK | Other-RLK |
| <i>Capsella bursa-pastoris</i> | Cbp26176 | RLK | Other-RLK |
| <i>Capsella bursa-pastoris</i> | Cbp2618  | RLK | LRR       |
| <i>Capsella bursa-pastoris</i> | Cbp26245 | RLK | LRR       |
| <i>Capsella bursa-pastoris</i> | Cbp26280 | RLK | LRR       |
| <i>Capsella bursa-pastoris</i> | Cbp2629  | RLK | Other-RLK |
| <i>Capsella bursa-pastoris</i> | Cbp26359 | RLK | LRR       |
| <i>Capsella bursa-pastoris</i> | Cbp26476 | RLK | Other-RLK |
| <i>Capsella bursa-pastoris</i> | Cbp26486 | RLK | LRR       |
| <i>Capsella bursa-pastoris</i> | Cbp26681 | RLK | Other-RLK |
| <i>Capsella bursa-pastoris</i> | Cbp26691 | RLK | LRR       |
| <i>Capsella bursa-pastoris</i> | Cbp26712 | RLK | Other-RLK |
| <i>Capsella bursa-pastoris</i> | Cbp26788 | RLK | LRR       |
| <i>Capsella bursa-pastoris</i> | Cbp26790 | RLK | LRR       |
| <i>Capsella bursa-pastoris</i> | Cbp26791 | RLK | LRR       |
| <i>Capsella bursa-pastoris</i> | Cbp26792 | RLK | LRR       |
| <i>Capsella bursa-pastoris</i> | Cbp26824 | RLK | LRR       |
| <i>Capsella bursa-pastoris</i> | Cbp26862 | RLK | LRR       |
| <i>Capsella bursa-pastoris</i> | Cbp26940 | RLK | LRR       |
| <i>Capsella bursa-pastoris</i> | Cbp26943 | RLK | LRR       |
| <i>Capsella bursa-pastoris</i> | Cbp26944 | RLK | Other-RLK |
| <i>Capsella bursa-pastoris</i> | Cbp26948 | RLK | LRR       |
| <i>Capsella bursa-pastoris</i> | Cbp26974 | RLK | Other-RLK |
| <i>Capsella bursa-pastoris</i> | Cbp26999 | RLK | LRR       |
| <i>Capsella bursa-pastoris</i> | Cbp27087 | RLK | Other-RLK |
| <i>Capsella bursa-pastoris</i> | Cbp27290 | RLK | LRR       |
| <i>Capsella bursa-pastoris</i> | Cbp27389 | RLK | Other-RLK |
| <i>Capsella bursa-pastoris</i> | Cbp27404 | RLK | Other-RLK |
| <i>Capsella bursa-pastoris</i> | Cbp27413 | RLK | LRR       |
| <i>Capsella bursa-pastoris</i> | Cbp27425 | RLK | LRR       |
| <i>Capsella bursa-pastoris</i> | Cbp275   | RLK | Other-RLK |
| <i>Capsella bursa-pastoris</i> | Cbp27546 | RLK | Other-RLK |
| <i>Capsella bursa-pastoris</i> | Cbp27639 | RLK | Other-RLK |
| <i>Capsella bursa-pastoris</i> | Cbp27656 | RLK | LRR       |
| <i>Capsella bursa-pastoris</i> | Cbp277   | RLK | Other-RLK |
| <i>Capsella bursa-pastoris</i> | Cbp2783  | RLK | Other-RLK |
| <i>Capsella bursa-pastoris</i> | Cbp27892 | RLK | Other-RLK |
| <i>Capsella bursa-pastoris</i> | Cbp27932 | RLK | LRR       |
| <i>Capsella bursa-pastoris</i> | Cbp27987 | RLK | LRR       |
| <i>Capsella bursa-pastoris</i> | Cbp27992 | RLK | Other-RLK |
| <i>Capsella bursa-pastoris</i> | Cbp28023 | RLK | Other-RLK |
| <i>Capsella bursa-pastoris</i> | Cbp28117 | RLK | Other-RLK |
| <i>Capsella bursa-pastoris</i> | Cbp28227 | RLK | Other-RLK |
| <i>Capsella bursa-pastoris</i> | Cbp28364 | RLK | Other-RLK |



|                                |          |     |           |
|--------------------------------|----------|-----|-----------|
| <i>Capsella bursa-pastoris</i> | Cbp28366 | RLK | Other-RLK |
| <i>Capsella bursa-pastoris</i> | Cbp2838  | RLK | LRR       |
| <i>Capsella bursa-pastoris</i> | Cbp28396 | RLK | LRR       |
| <i>Capsella bursa-pastoris</i> | Cbp28457 | RLK | Other-RLK |
| <i>Capsella bursa-pastoris</i> | Cbp28469 | RLK | Other-RLK |
| <i>Capsella bursa-pastoris</i> | Cbp2857  | RLK | LRR       |
| <i>Capsella bursa-pastoris</i> | Cbp28632 | RLK | LRR       |
| <i>Capsella bursa-pastoris</i> | Cbp28784 | RLK | Other-RLK |
| <i>Capsella bursa-pastoris</i> | Cbp28817 | RLK | LRR       |
| <i>Capsella bursa-pastoris</i> | Cbp28826 | RLK | LRR       |
| <i>Capsella bursa-pastoris</i> | Cbp28880 | RLK | LRR       |
| <i>Capsella bursa-pastoris</i> | Cbp28881 | RLK | LRR       |
| <i>Capsella bursa-pastoris</i> | Cbp28892 | RLK | Other-RLK |
| <i>Capsella bursa-pastoris</i> | Cbp28893 | RLK | Other-RLK |
| <i>Capsella bursa-pastoris</i> | Cbp28898 | RLK | Other-RLK |
| <i>Capsella bursa-pastoris</i> | Cbp28921 | RLK | LRR       |
| <i>Capsella bursa-pastoris</i> | Cbp29033 | RLK | Other-RLK |
| <i>Capsella bursa-pastoris</i> | Cbp29079 | RLK | LRR       |
| <i>Capsella bursa-pastoris</i> | Cbp29104 | RLK | Other-RLK |
| <i>Capsella bursa-pastoris</i> | Cbp29208 | RLK | Other-RLK |
| <i>Capsella bursa-pastoris</i> | Cbp29211 | RLK | LRR       |
| <i>Capsella bursa-pastoris</i> | Cbp29213 | RLK | Other-RLK |
| <i>Capsella bursa-pastoris</i> | Cbp29240 | RLK | Other-RLK |
| <i>Capsella bursa-pastoris</i> | Cbp29489 | RLK | Other-RLK |
| <i>Capsella bursa-pastoris</i> | Cbp29821 | RLK | LRR       |
| <i>Capsella bursa-pastoris</i> | Cbp29842 | RLK | Other-RLK |
| <i>Capsella bursa-pastoris</i> | Cbp29918 | RLK | LRR       |
| <i>Capsella bursa-pastoris</i> | Cbp30042 | RLK | Other-RLK |
| <i>Capsella bursa-pastoris</i> | Cbp30058 | RLK | Other-RLK |
| <i>Capsella bursa-pastoris</i> | Cbp30110 | RLK | LRR       |
| <i>Capsella bursa-pastoris</i> | Cbp30117 | RLK | Other-RLK |
| <i>Capsella bursa-pastoris</i> | Cbp30121 | RLK | Other-RLK |
| <i>Capsella bursa-pastoris</i> | Cbp30122 | RLK | Other-RLK |
| <i>Capsella bursa-pastoris</i> | Cbp30123 | RLK | Other-RLK |
| <i>Capsella bursa-pastoris</i> | Cbp30130 | RLK | Other-RLK |
| <i>Capsella bursa-pastoris</i> | Cbp30243 | RLK | Other-RLK |
| <i>Capsella bursa-pastoris</i> | Cbp30247 | RLK | LRR       |
| <i>Capsella bursa-pastoris</i> | Cbp3027  | RLK | Other-RLK |
| <i>Capsella bursa-pastoris</i> | Cbp30376 | RLK | Other-RLK |
| <i>Capsella bursa-pastoris</i> | Cbp30377 | RLK | Other-RLK |
| <i>Capsella bursa-pastoris</i> | Cbp30378 | RLK | Other-RLK |
| <i>Capsella bursa-pastoris</i> | Cbp30379 | RLK | Other-RLK |
| <i>Capsella bursa-pastoris</i> | Cbp30380 | RLK | Other-RLK |
| <i>Capsella bursa-pastoris</i> | Cbp30413 | RLK | LRR       |
| <i>Capsella bursa-pastoris</i> | Cbp30477 | RLK | LRR       |
| <i>Capsella bursa-pastoris</i> | Cbp3052  | RLK | Other-RLK |
| <i>Capsella bursa-pastoris</i> | Cbp30557 | RLK | Other-RLK |
| <i>Capsella bursa-pastoris</i> | Cbp30617 | RLK | LRR       |
| <i>Capsella bursa-pastoris</i> | Cbp30662 | RLK | Other-RLK |
| <i>Capsella bursa-pastoris</i> | Cbp30838 | RLK | Lysm      |
| <i>Capsella bursa-pastoris</i> | Cbp30984 | RLK | LRR       |
| <i>Capsella bursa-pastoris</i> | Cbp31061 | RLK | LRR       |
| <i>Capsella bursa-pastoris</i> | Cbp31114 | RLK | LRR       |
| <i>Capsella bursa-pastoris</i> | Cbp3114  | RLK | LRR       |
| <i>Capsella bursa-pastoris</i> | Cbp31202 | RLK | LRR       |
| <i>Capsella bursa-pastoris</i> | Cbp31214 | RLK | LRR       |
| <i>Capsella bursa-pastoris</i> | Cbp31244 | RLK | LRR       |
| <i>Capsella bursa-pastoris</i> | Cbp31255 | RLK | Other-RLK |
| <i>Capsella bursa-pastoris</i> | Cbp31289 | RLK | Other-RLK |
| <i>Capsella bursa-pastoris</i> | Cbp31291 | RLK | LRR       |
| <i>Capsella bursa-pastoris</i> | Cbp31306 | RLK | LRR       |
| <i>Capsella bursa-pastoris</i> | Cbp31324 | RLK | Other-RLK |

|                                |          |     |           |
|--------------------------------|----------|-----|-----------|
| <i>Capsella bursa-pastoris</i> | Cbp3137  | RLK | LRR       |
| <i>Capsella bursa-pastoris</i> | Cbp31430 | RLK | LRR       |
| <i>Capsella bursa-pastoris</i> | Cbp31492 | RLK | Other-RLK |
| <i>Capsella bursa-pastoris</i> | Cbp31583 | RLK | Other-RLK |
| <i>Capsella bursa-pastoris</i> | Cbp31597 | RLK | LRR       |
| <i>Capsella bursa-pastoris</i> | Cbp31617 | RLK | Other-RLK |
| <i>Capsella bursa-pastoris</i> | Cbp31758 | RLK | Other-RLK |
| <i>Capsella bursa-pastoris</i> | Cbp31767 | RLK | LRR       |
| <i>Capsella bursa-pastoris</i> | Cbp31780 | RLK | LRR       |
| <i>Capsella bursa-pastoris</i> | Cbp31898 | RLK | Other-RLK |
| <i>Capsella bursa-pastoris</i> | Cbp31994 | RLK | LRR       |
| <i>Capsella bursa-pastoris</i> | Cbp31996 | RLK | LRR       |
| <i>Capsella bursa-pastoris</i> | Cbp32039 | RLK | Other-RLK |
| <i>Capsella bursa-pastoris</i> | Cbp32040 | RLK | Other-RLK |
| <i>Capsella bursa-pastoris</i> | Cbp32041 | RLK | Other-RLK |
| <i>Capsella bursa-pastoris</i> | Cbp32042 | RLK | Other-RLK |
| <i>Capsella bursa-pastoris</i> | Cbp32045 | RLK | Other-RLK |
| <i>Capsella bursa-pastoris</i> | Cbp32075 | RLK | Other-RLK |
| <i>Capsella bursa-pastoris</i> | Cbp32272 | RLK | LRR       |
| <i>Capsella bursa-pastoris</i> | Cbp32344 | RLK | Other-RLK |
| <i>Capsella bursa-pastoris</i> | Cbp32345 | RLK | Other-RLK |
| <i>Capsella bursa-pastoris</i> | Cbp32346 | RLK | Other-RLK |
| <i>Capsella bursa-pastoris</i> | Cbp32347 | RLK | Other-RLK |
| <i>Capsella bursa-pastoris</i> | Cbp3235  | RLK | LRR       |
| <i>Capsella bursa-pastoris</i> | Cbp32396 | RLK | LRR       |
| <i>Capsella bursa-pastoris</i> | Cbp32414 | RLK | LRR       |
| <i>Capsella bursa-pastoris</i> | Cbp32422 | RLK | LRR       |
| <i>Capsella bursa-pastoris</i> | Cbp32514 | RLK | Other-RLK |
| <i>Capsella bursa-pastoris</i> | Cbp32571 | RLK | LRR       |
| <i>Capsella bursa-pastoris</i> | Cbp32712 | RLK | LRR       |
| <i>Capsella bursa-pastoris</i> | Cbp32778 | RLK | Other-RLK |
| <i>Capsella bursa-pastoris</i> | Cbp32988 | RLK | Other-RLK |
| <i>Capsella bursa-pastoris</i> | Cbp33018 | RLK | Lysm      |
| <i>Capsella bursa-pastoris</i> | Cbp33023 | RLK | LRR       |
| <i>Capsella bursa-pastoris</i> | Cbp33024 | RLK | LRR       |
| <i>Capsella bursa-pastoris</i> | Cbp33025 | RLK | LRR       |
| <i>Capsella bursa-pastoris</i> | Cbp33026 | RLK | LRR       |
| <i>Capsella bursa-pastoris</i> | Cbp33028 | RLK | LRR       |
| <i>Capsella bursa-pastoris</i> | Cbp33029 | RLK | LRR       |
| <i>Capsella bursa-pastoris</i> | Cbp33118 | RLK | Other-RLK |
| <i>Capsella bursa-pastoris</i> | Cbp33126 | RLK | LRR       |
| <i>Capsella bursa-pastoris</i> | Cbp33194 | RLK | Other-RLK |
| <i>Capsella bursa-pastoris</i> | Cbp33234 | RLK | Other-RLK |
| <i>Capsella bursa-pastoris</i> | Cbp3325  | RLK | LRR       |
| <i>Capsella bursa-pastoris</i> | Cbp33254 | RLK | LRR       |
| <i>Capsella bursa-pastoris</i> | Cbp33312 | RLK | LRR       |
| <i>Capsella bursa-pastoris</i> | Cbp3336  | RLK | Other-RLK |
| <i>Capsella bursa-pastoris</i> | Cbp33387 | RLK | LRR       |
| <i>Capsella bursa-pastoris</i> | Cbp33537 | RLK | LRR       |
| <i>Capsella bursa-pastoris</i> | Cbp33546 | RLK | LRR       |
| <i>Capsella bursa-pastoris</i> | Cbp3356  | RLK | Other-RLK |
| <i>Capsella bursa-pastoris</i> | Cbp3357  | RLK | Other-RLK |
| <i>Capsella bursa-pastoris</i> | Cbp33648 | RLK | LRR       |
| <i>Capsella bursa-pastoris</i> | Cbp33663 | RLK | LRR       |
| <i>Capsella bursa-pastoris</i> | Cbp33678 | RLK | Other-RLK |
| <i>Capsella bursa-pastoris</i> | Cbp33727 | RLK | Other-RLK |
| <i>Capsella bursa-pastoris</i> | Cbp33732 | RLK | Other-RLK |
| <i>Capsella bursa-pastoris</i> | Cbp33733 | RLK | Other-RLK |
| <i>Capsella bursa-pastoris</i> | Cbp33738 | RLK | Other-RLK |
| <i>Capsella bursa-pastoris</i> | Cbp33747 | RLK | Other-RLK |
| <i>Capsella bursa-pastoris</i> | Cbp33874 | RLK | LRR       |
| <i>Capsella bursa-pastoris</i> | Cbp34    | RLK | LRR       |

|                                |          |     |           |
|--------------------------------|----------|-----|-----------|
| <i>Capsella bursa-pastoris</i> | Cbp34033 | RLK | LRR       |
| <i>Capsella bursa-pastoris</i> | Cbp34125 | RLK | LRR       |
| <i>Capsella bursa-pastoris</i> | Cbp34184 | RLK | LRR       |
| <i>Capsella bursa-pastoris</i> | Cbp34185 | RLK | LRR       |
| <i>Capsella bursa-pastoris</i> | Cbp34186 | RLK | LRR       |
| <i>Capsella bursa-pastoris</i> | Cbp34194 | RLK | LRR       |
| <i>Capsella bursa-pastoris</i> | Cbp34208 | RLK | Other-RLK |
| <i>Capsella bursa-pastoris</i> | Cbp34264 | RLK | LRR       |
| <i>Capsella bursa-pastoris</i> | Cbp34295 | RLK | Other-RLK |
| <i>Capsella bursa-pastoris</i> | Cbp34344 | RLK | LRR       |
| <i>Capsella bursa-pastoris</i> | Cbp34345 | RLK | LRR       |
| <i>Capsella bursa-pastoris</i> | Cbp34449 | RLK | LRR       |
| <i>Capsella bursa-pastoris</i> | Cbp34641 | RLK | Other-RLK |
| <i>Capsella bursa-pastoris</i> | Cbp34697 | RLK | Other-RLK |
| <i>Capsella bursa-pastoris</i> | Cbp34698 | RLK | Other-RLK |
| <i>Capsella bursa-pastoris</i> | Cbp34699 | RLK | Other-RLK |
| <i>Capsella bursa-pastoris</i> | Cbp34700 | RLK | Other-RLK |
| <i>Capsella bursa-pastoris</i> | Cbp34742 | RLK | Other-RLK |
| <i>Capsella bursa-pastoris</i> | Cbp34931 | RLK | Other-RLK |
| <i>Capsella bursa-pastoris</i> | Cbp34971 | RLK | Other-RLK |
| <i>Capsella bursa-pastoris</i> | Cbp34972 | RLK | Other-RLK |
| <i>Capsella bursa-pastoris</i> | Cbp34974 | RLK | Other-RLK |
| <i>Capsella bursa-pastoris</i> | Cbp35106 | RLK | LRR       |
| <i>Capsella bursa-pastoris</i> | Cbp35268 | RLK | Other-RLK |
| <i>Capsella bursa-pastoris</i> | Cbp35304 | RLK | Other-RLK |
| <i>Capsella bursa-pastoris</i> | Cbp35484 | RLK | LRR       |
| <i>Capsella bursa-pastoris</i> | Cbp35488 | RLK | LRR       |
| <i>Capsella bursa-pastoris</i> | Cbp35500 | RLK | Other-RLK |
| <i>Capsella bursa-pastoris</i> | Cbp35538 | RLK | Other-RLK |
| <i>Capsella bursa-pastoris</i> | Cbp35539 | RLK | Other-RLK |
| <i>Capsella bursa-pastoris</i> | Cbp35596 | RLK | LRR       |
| <i>Capsella bursa-pastoris</i> | Cbp35615 | RLK | LRR       |
| <i>Capsella bursa-pastoris</i> | Cbp3562  | RLK | Other-RLK |
| <i>Capsella bursa-pastoris</i> | Cbp3579  | RLK | LRR       |
| <i>Capsella bursa-pastoris</i> | Cbp35962 | RLK | LRR       |
| <i>Capsella bursa-pastoris</i> | Cbp35963 | RLK | LRR       |
| <i>Capsella bursa-pastoris</i> | Cbp36013 | RLK | Other-RLK |
| <i>Capsella bursa-pastoris</i> | Cbp36084 | RLK | LRR       |
| <i>Capsella bursa-pastoris</i> | Cbp36143 | RLK | Other-RLK |
| <i>Capsella bursa-pastoris</i> | Cbp36156 | RLK | LRR       |
| <i>Capsella bursa-pastoris</i> | Cbp36165 | RLK | LRR       |
| <i>Capsella bursa-pastoris</i> | Cbp36166 | RLK | LRR       |
| <i>Capsella bursa-pastoris</i> | Cbp36168 | RLK | LRR       |
| <i>Capsella bursa-pastoris</i> | Cbp3643  | RLK | LRR       |
| <i>Capsella bursa-pastoris</i> | Cbp36460 | RLK | Other-RLK |
| <i>Capsella bursa-pastoris</i> | Cbp36484 | RLK | LRR       |
| <i>Capsella bursa-pastoris</i> | Cbp36530 | RLK | LRR       |
| <i>Capsella bursa-pastoris</i> | Cbp36544 | RLK | LRR       |
| <i>Capsella bursa-pastoris</i> | Cbp36578 | RLK | Other-RLK |
| <i>Capsella bursa-pastoris</i> | Cbp3690  | RLK | Other-RLK |
| <i>Capsella bursa-pastoris</i> | Cbp36966 | RLK | LRR       |
| <i>Capsella bursa-pastoris</i> | Cbp36977 | RLK | Other-RLK |
| <i>Capsella bursa-pastoris</i> | Cbp36995 | RLK | Other-RLK |
| <i>Capsella bursa-pastoris</i> | Cbp370   | RLK | Other-RLK |
| <i>Capsella bursa-pastoris</i> | Cbp37036 | RLK | LRR       |
| <i>Capsella bursa-pastoris</i> | Cbp37052 | RLK | LRR       |
| <i>Capsella bursa-pastoris</i> | Cbp37053 | RLK | LRR       |
| <i>Capsella bursa-pastoris</i> | Cbp37057 | RLK | LRR       |
| <i>Capsella bursa-pastoris</i> | Cbp37181 | RLK | Other-RLK |
| <i>Capsella bursa-pastoris</i> | Cbp37256 | RLK | Other-RLK |
| <i>Capsella bursa-pastoris</i> | Cbp37257 | RLK | Other-RLK |
| <i>Capsella bursa-pastoris</i> | Cbp37274 | RLK | Other-RLK |

|                                |          |     |           |
|--------------------------------|----------|-----|-----------|
| <i>Capsella bursa-pastoris</i> | Cbp37376 | RLK | LRR       |
| <i>Capsella bursa-pastoris</i> | Cbp37377 | RLK | LRR       |
| <i>Capsella bursa-pastoris</i> | Cbp37403 | RLK | LRR       |
| <i>Capsella bursa-pastoris</i> | Cbp37480 | RLK | LRR       |
| <i>Capsella bursa-pastoris</i> | Cbp37482 | RLK | LRR       |
| <i>Capsella bursa-pastoris</i> | Cbp37497 | RLK | LRR       |
| <i>Capsella bursa-pastoris</i> | Cbp37550 | RLK | LRR       |
| <i>Capsella bursa-pastoris</i> | Cbp37630 | RLK | LRR       |
| <i>Capsella bursa-pastoris</i> | Cbp37713 | RLK | LRR       |
| <i>Capsella bursa-pastoris</i> | Cbp37729 | RLK | LRR       |
| <i>Capsella bursa-pastoris</i> | Cbp38    | RLK | LRR       |
| <i>Capsella bursa-pastoris</i> | Cbp38028 | RLK | LRR       |
| <i>Capsella bursa-pastoris</i> | Cbp38092 | RLK | Other-RLK |
| <i>Capsella bursa-pastoris</i> | Cbp38193 | RLK | Other-RLK |
| <i>Capsella bursa-pastoris</i> | Cbp38211 | RLK | LRR       |
| <i>Capsella bursa-pastoris</i> | Cbp38224 | RLK | LRR       |
| <i>Capsella bursa-pastoris</i> | Cbp38226 | RLK | Other-RLK |
| <i>Capsella bursa-pastoris</i> | Cbp38257 | RLK | Other-RLK |
| <i>Capsella bursa-pastoris</i> | Cbp38267 | RLK | LRR       |
| <i>Capsella bursa-pastoris</i> | Cbp38308 | RLK | LRR       |
| <i>Capsella bursa-pastoris</i> | Cbp38392 | RLK | LRR       |
| <i>Capsella bursa-pastoris</i> | Cbp38429 | RLK | Other-RLK |
| <i>Capsella bursa-pastoris</i> | Cbp38442 | RLK | Other-RLK |
| <i>Capsella bursa-pastoris</i> | Cbp38452 | RLK | LRR       |
| <i>Capsella bursa-pastoris</i> | Cbp38533 | RLK | Other-RLK |
| <i>Capsella bursa-pastoris</i> | Cbp38541 | RLK | Other-RLK |
| <i>Capsella bursa-pastoris</i> | Cbp38634 | RLK | LRR       |
| <i>Capsella bursa-pastoris</i> | Cbp38703 | RLK | LRR       |
| <i>Capsella bursa-pastoris</i> | Cbp38874 | RLK | Other-RLK |
| <i>Capsella bursa-pastoris</i> | Cbp389   | RLK | LRR       |
| <i>Capsella bursa-pastoris</i> | Cbp39056 | RLK | Other-RLK |
| <i>Capsella bursa-pastoris</i> | Cbp39099 | RLK | Other-RLK |
| <i>Capsella bursa-pastoris</i> | Cbp39125 | RLK | Other-RLK |
| <i>Capsella bursa-pastoris</i> | Cbp39349 | RLK | Other-RLK |
| <i>Capsella bursa-pastoris</i> | Cbp39465 | RLK | Other-RLK |
| <i>Capsella bursa-pastoris</i> | Cbp39488 | RLK | Other-RLK |
| <i>Capsella bursa-pastoris</i> | Cbp39490 | RLK | Other-RLK |
| <i>Capsella bursa-pastoris</i> | Cbp39492 | RLK | Other-RLK |
| <i>Capsella bursa-pastoris</i> | Cbp39493 | RLK | Other-RLK |
| <i>Capsella bursa-pastoris</i> | Cbp39494 | RLK | Other-RLK |
| <i>Capsella bursa-pastoris</i> | Cbp39510 | RLK | Other-RLK |
| <i>Capsella bursa-pastoris</i> | Cbp39529 | RLK | Other-RLK |
| <i>Capsella bursa-pastoris</i> | Cbp39573 | RLK | Other-RLK |
| <i>Capsella bursa-pastoris</i> | Cbp39577 | RLK | LRR       |
| <i>Capsella bursa-pastoris</i> | Cbp39578 | RLK | LRR       |
| <i>Capsella bursa-pastoris</i> | Cbp39579 | RLK | LRR       |
| <i>Capsella bursa-pastoris</i> | Cbp39580 | RLK | LRR       |
| <i>Capsella bursa-pastoris</i> | Cbp39637 | RLK | LRR       |
| <i>Capsella bursa-pastoris</i> | Cbp39669 | RLK | LRR       |
| <i>Capsella bursa-pastoris</i> | Cbp39671 | RLK | LRR       |
| <i>Capsella bursa-pastoris</i> | Cbp39672 | RLK | LRR       |
| <i>Capsella bursa-pastoris</i> | Cbp3974  | RLK | Other-RLK |
| <i>Capsella bursa-pastoris</i> | Cbp39862 | RLK | LRR       |
| <i>Capsella bursa-pastoris</i> | Cbp39914 | RLK | LRR       |
| <i>Capsella bursa-pastoris</i> | Cbp39916 | RLK | Other-RLK |
| <i>Capsella bursa-pastoris</i> | Cbp40054 | RLK | Other-RLK |
| <i>Capsella bursa-pastoris</i> | Cbp40103 | RLK | Other-RLK |
| <i>Capsella bursa-pastoris</i> | Cbp40123 | RLK | Other-RLK |
| <i>Capsella bursa-pastoris</i> | Cbp40324 | RLK | Other-RLK |
| <i>Capsella bursa-pastoris</i> | Cbp40348 | RLK | LRR       |
| <i>Capsella bursa-pastoris</i> | Cbp40382 | RLK | LRR       |
| <i>Capsella bursa-pastoris</i> | Cbp40474 | RLK | LRR       |

|                                |          |     |           |
|--------------------------------|----------|-----|-----------|
| <i>Capsella bursa-pastoris</i> | Cbp405   | RLK | Other-RLK |
| <i>Capsella bursa-pastoris</i> | Cbp40689 | RLK | LRR       |
| <i>Capsella bursa-pastoris</i> | Cbp4077  | RLK | Other-RLK |
| <i>Capsella bursa-pastoris</i> | Cbp40991 | RLK | Other-RLK |
| <i>Capsella bursa-pastoris</i> | Cbp40997 | RLK | Other-RLK |
| <i>Capsella bursa-pastoris</i> | Cbp40998 | RLK | Other-RLK |
| <i>Capsella bursa-pastoris</i> | Cbp40999 | RLK | Other-RLK |
| <i>Capsella bursa-pastoris</i> | Cbp41001 | RLK | Other-RLK |
| <i>Capsella bursa-pastoris</i> | Cbp41023 | RLK | Other-RLK |
| <i>Capsella bursa-pastoris</i> | Cbp41047 | RLK | Other-RLK |
| <i>Capsella bursa-pastoris</i> | Cbp41079 | RLK | Other-RLK |
| <i>Capsella bursa-pastoris</i> | Cbp41157 | RLK | LRR       |
| <i>Capsella bursa-pastoris</i> | Cbp41168 | RLK | Other-RLK |
| <i>Capsella bursa-pastoris</i> | Cbp41170 | RLK | Other-RLK |
| <i>Capsella bursa-pastoris</i> | Cbp41321 | RLK | LRR       |
| <i>Capsella bursa-pastoris</i> | Cbp41370 | RLK | LRR       |
| <i>Capsella bursa-pastoris</i> | Cbp41661 | RLK | LRR       |
| <i>Capsella bursa-pastoris</i> | Cbp41671 | RLK | LRR       |
| <i>Capsella bursa-pastoris</i> | Cbp41672 | RLK | LRR       |
| <i>Capsella bursa-pastoris</i> | Cbp41673 | RLK | LRR       |
| <i>Capsella bursa-pastoris</i> | Cbp41724 | RLK | Other-RLK |
| <i>Capsella bursa-pastoris</i> | Cbp41731 | RLK | Other-RLK |
| <i>Capsella bursa-pastoris</i> | Cbp41732 | RLK | Other-RLK |
| <i>Capsella bursa-pastoris</i> | Cbp41733 | RLK | Other-RLK |
| <i>Capsella bursa-pastoris</i> | Cbp41734 | RLK | Other-RLK |
| <i>Capsella bursa-pastoris</i> | Cbp41778 | RLK | Other-RLK |
| <i>Capsella bursa-pastoris</i> | Cbp41880 | RLK | LRR       |
| <i>Capsella bursa-pastoris</i> | Cbp41977 | RLK | Other-RLK |
| <i>Capsella bursa-pastoris</i> | Cbp42093 | RLK | LRR       |
| <i>Capsella bursa-pastoris</i> | Cbp42151 | RLK | Other-RLK |
| <i>Capsella bursa-pastoris</i> | Cbp42314 | RLK | Other-RLK |
| <i>Capsella bursa-pastoris</i> | Cbp42426 | RLK | Other-RLK |
| <i>Capsella bursa-pastoris</i> | Cbp4243  | RLK | Other-RLK |
| <i>Capsella bursa-pastoris</i> | Cbp42447 | RLK | LRR       |
| <i>Capsella bursa-pastoris</i> | Cbp42529 | RLK | LRR       |
| <i>Capsella bursa-pastoris</i> | Cbp42540 | RLK | Other-RLK |
| <i>Capsella bursa-pastoris</i> | Cbp42541 | RLK | Other-RLK |
| <i>Capsella bursa-pastoris</i> | Cbp42561 | RLK | Other-RLK |
| <i>Capsella bursa-pastoris</i> | Cbp42603 | RLK | LRR       |
| <i>Capsella bursa-pastoris</i> | Cbp42618 | RLK | LRR       |
| <i>Capsella bursa-pastoris</i> | Cbp42622 | RLK | LRR       |
| <i>Capsella bursa-pastoris</i> | Cbp42756 | RLK | Other-RLK |
| <i>Capsella bursa-pastoris</i> | Cbp42823 | RLK | Other-RLK |
| <i>Capsella bursa-pastoris</i> | Cbp42872 | RLK | LRR       |
| <i>Capsella bursa-pastoris</i> | Cbp42873 | RLK | LRR       |
| <i>Capsella bursa-pastoris</i> | Cbp42874 | RLK | LRR       |
| <i>Capsella bursa-pastoris</i> | Cbp42875 | RLK | LRR       |
| <i>Capsella bursa-pastoris</i> | Cbp42919 | RLK | Other-RLK |
| <i>Capsella bursa-pastoris</i> | Cbp42965 | RLK | LRR       |
| <i>Capsella bursa-pastoris</i> | Cbp43004 | RLK | Other-RLK |
| <i>Capsella bursa-pastoris</i> | Cbp43118 | RLK | Other-RLK |
| <i>Capsella bursa-pastoris</i> | Cbp43237 | RLK | Other-RLK |
| <i>Capsella bursa-pastoris</i> | Cbp43310 | RLK | LRR       |
| <i>Capsella bursa-pastoris</i> | Cbp43359 | RLK | LRR       |
| <i>Capsella bursa-pastoris</i> | Cbp43377 | RLK | Other-RLK |
| <i>Capsella bursa-pastoris</i> | Cbp43438 | RLK | LRR       |
| <i>Capsella bursa-pastoris</i> | Cbp43466 | RLK | LRR       |
| <i>Capsella bursa-pastoris</i> | Cbp43530 | RLK | Other-RLK |
| <i>Capsella bursa-pastoris</i> | Cbp43746 | RLK | Other-RLK |
| <i>Capsella bursa-pastoris</i> | Cbp43762 | RLK | Other-RLK |
| <i>Capsella bursa-pastoris</i> | Cbp43856 | RLK | Other-RLK |
| <i>Capsella bursa-pastoris</i> | Cbp43946 | RLK | Other-RLK |

|                                |          |     |           |
|--------------------------------|----------|-----|-----------|
| <i>Capsella bursa-pastoris</i> | Cbp43977 | RLK | Other-RLK |
| <i>Capsella bursa-pastoris</i> | Cbp44    | RLK | Other-RLK |
| <i>Capsella bursa-pastoris</i> | Cbp44010 | RLK | Other-RLK |
| <i>Capsella bursa-pastoris</i> | Cbp44069 | RLK | Other-RLK |
| <i>Capsella bursa-pastoris</i> | Cbp44104 | RLK | LRR       |
| <i>Capsella bursa-pastoris</i> | Cbp44204 | RLK | LRR       |
| <i>Capsella bursa-pastoris</i> | Cbp44331 | RLK | LRR       |
| <i>Capsella bursa-pastoris</i> | Cbp44371 | RLK | LRR       |
| <i>Capsella bursa-pastoris</i> | Cbp44396 | RLK | LRR       |
| <i>Capsella bursa-pastoris</i> | Cbp44412 | RLK | LRR       |
| <i>Capsella bursa-pastoris</i> | Cbp44456 | RLK | LRR       |
| <i>Capsella bursa-pastoris</i> | Cbp44518 | RLK | Other-RLK |
| <i>Capsella bursa-pastoris</i> | Cbp44670 | RLK | Other-RLK |
| <i>Capsella bursa-pastoris</i> | Cbp44671 | RLK | Other-RLK |
| <i>Capsella bursa-pastoris</i> | Cbp44673 | RLK | Other-RLK |
| <i>Capsella bursa-pastoris</i> | Cbp44674 | RLK | Other-RLK |
| <i>Capsella bursa-pastoris</i> | Cbp44677 | RLK | Other-RLK |
| <i>Capsella bursa-pastoris</i> | Cbp44875 | RLK | Other-RLK |
| <i>Capsella bursa-pastoris</i> | Cbp44934 | RLK | LRR       |
| <i>Capsella bursa-pastoris</i> | Cbp45027 | RLK | Other-RLK |
| <i>Capsella bursa-pastoris</i> | Cbp45073 | RLK | LRR       |
| <i>Capsella bursa-pastoris</i> | Cbp45425 | RLK | LRR       |
| <i>Capsella bursa-pastoris</i> | Cbp45428 | RLK | Other-RLK |
| <i>Capsella bursa-pastoris</i> | Cbp45429 | RLK | LRR       |
| <i>Capsella bursa-pastoris</i> | Cbp45432 | RLK | LRR       |
| <i>Capsella bursa-pastoris</i> | Cbp45532 | RLK | LRR       |
| <i>Capsella bursa-pastoris</i> | Cbp45562 | RLK | LRR       |
| <i>Capsella bursa-pastoris</i> | Cbp46103 | RLK | Other-RLK |
| <i>Capsella bursa-pastoris</i> | Cbp46167 | RLK | Other-RLK |
| <i>Capsella bursa-pastoris</i> | Cbp46187 | RLK | LRR       |
| <i>Capsella bursa-pastoris</i> | Cbp46188 | RLK | LRR       |
| <i>Capsella bursa-pastoris</i> | Cbp46189 | RLK | LRR       |
| <i>Capsella bursa-pastoris</i> | Cbp46190 | RLK | LRR       |
| <i>Capsella bursa-pastoris</i> | Cbp46191 | RLK | LRR       |
| <i>Capsella bursa-pastoris</i> | Cbp46192 | RLK | LRR       |
| <i>Capsella bursa-pastoris</i> | Cbp46196 | RLK | Lysm      |
| <i>Capsella bursa-pastoris</i> | Cbp46234 | RLK | Other-RLK |
| <i>Capsella bursa-pastoris</i> | Cbp46352 | RLK | LRR       |
| <i>Capsella bursa-pastoris</i> | Cbp46353 | RLK | LRR       |
| <i>Capsella bursa-pastoris</i> | Cbp46381 | RLK | LRR       |
| <i>Capsella bursa-pastoris</i> | Cbp4642  | RLK | LRR       |
| <i>Capsella bursa-pastoris</i> | Cbp46658 | RLK | Other-RLK |
| <i>Capsella bursa-pastoris</i> | Cbp46804 | RLK | Other-RLK |
| <i>Capsella bursa-pastoris</i> | Cbp46805 | RLK | Other-RLK |
| <i>Capsella bursa-pastoris</i> | Cbp46885 | RLK | Other-RLK |
| <i>Capsella bursa-pastoris</i> | Cbp46894 | RLK | Other-RLK |
| <i>Capsella bursa-pastoris</i> | Cbp46901 | RLK | Other-RLK |
| <i>Capsella bursa-pastoris</i> | Cbp46902 | RLK | Other-RLK |
| <i>Capsella bursa-pastoris</i> | Cbp46903 | RLK | Other-RLK |
| <i>Capsella bursa-pastoris</i> | Cbp46958 | RLK | LRR       |
| <i>Capsella bursa-pastoris</i> | Cbp46981 | RLK | LRR       |
| <i>Capsella bursa-pastoris</i> | Cbp47025 | RLK | Other-RLK |
| <i>Capsella bursa-pastoris</i> | Cbp47030 | RLK | LRR       |
| <i>Capsella bursa-pastoris</i> | Cbp47067 | RLK | Other-RLK |
| <i>Capsella bursa-pastoris</i> | Cbp4710  | RLK | Other-RLK |
| <i>Capsella bursa-pastoris</i> | Cbp47117 | RLK | LRR       |
| <i>Capsella bursa-pastoris</i> | Cbp47165 | RLK | LRR       |
| <i>Capsella bursa-pastoris</i> | Cbp47177 | RLK | LRR       |
| <i>Capsella bursa-pastoris</i> | Cbp47192 | RLK | LRR       |
| <i>Capsella bursa-pastoris</i> | Cbp47224 | RLK | LRR       |
| <i>Capsella bursa-pastoris</i> | Cbp47329 | RLK | Other-RLK |
| <i>Capsella bursa-pastoris</i> | Cbp47330 | RLK | Other-RLK |

|                                |          |     |           |
|--------------------------------|----------|-----|-----------|
| <i>Capsella bursa-pastoris</i> | Cbp47344 | RLK | Other-RLK |
| <i>Capsella bursa-pastoris</i> | Cbp47354 | RLK | LRR       |
| <i>Capsella bursa-pastoris</i> | Cbp47356 | RLK | LRR       |
| <i>Capsella bursa-pastoris</i> | Cbp47362 | RLK | LRR       |
| <i>Capsella bursa-pastoris</i> | Cbp47364 | RLK | LRR       |
| <i>Capsella bursa-pastoris</i> | Cbp47366 | RLK | LRR       |
| <i>Capsella bursa-pastoris</i> | Cbp47460 | RLK | LRR       |
| <i>Capsella bursa-pastoris</i> | Cbp47469 | RLK | Other-RLK |
| <i>Capsella bursa-pastoris</i> | Cbp47493 | RLK | LRR       |
| <i>Capsella bursa-pastoris</i> | Cbp4758  | RLK | Other-RLK |
| <i>Capsella bursa-pastoris</i> | Cbp4759  | RLK | Other-RLK |
| <i>Capsella bursa-pastoris</i> | Cbp4767  | RLK | Other-RLK |
| <i>Capsella bursa-pastoris</i> | Cbp47776 | RLK | Other-RLK |
| <i>Capsella bursa-pastoris</i> | Cbp47782 | RLK | Other-RLK |
| <i>Capsella bursa-pastoris</i> | Cbp47800 | RLK | LRR       |
| <i>Capsella bursa-pastoris</i> | Cbp47844 | RLK | Other-RLK |
| <i>Capsella bursa-pastoris</i> | Cbp4797  | RLK | Other-RLK |
| <i>Capsella bursa-pastoris</i> | Cbp4799  | RLK | Other-RLK |
| <i>Capsella bursa-pastoris</i> | Cbp48025 | RLK | Other-RLK |
| <i>Capsella bursa-pastoris</i> | Cbp48026 | RLK | Other-RLK |
| <i>Capsella bursa-pastoris</i> | Cbp48206 | RLK | Other-RLK |
| <i>Capsella bursa-pastoris</i> | Cbp48224 | RLK | Other-RLK |
| <i>Capsella bursa-pastoris</i> | Cbp48372 | RLK | Other-RLK |
| <i>Capsella bursa-pastoris</i> | Cbp4851  | RLK | Other-RLK |
| <i>Capsella bursa-pastoris</i> | Cbp48535 | RLK | LRR       |
| <i>Capsella bursa-pastoris</i> | Cbp48577 | RLK | LRR       |
| <i>Capsella bursa-pastoris</i> | Cbp48710 | RLK | LRR       |
| <i>Capsella bursa-pastoris</i> | Cbp48717 | RLK | Other-RLK |
| <i>Capsella bursa-pastoris</i> | Cbp48721 | RLK | Other-RLK |
| <i>Capsella bursa-pastoris</i> | Cbp48722 | RLK | Other-RLK |
| <i>Capsella bursa-pastoris</i> | Cbp48723 | RLK | Other-RLK |
| <i>Capsella bursa-pastoris</i> | Cbp48724 | RLK | Other-RLK |
| <i>Capsella bursa-pastoris</i> | Cbp48725 | RLK | Other-RLK |
| <i>Capsella bursa-pastoris</i> | Cbp48729 | RLK | Other-RLK |
| <i>Capsella bursa-pastoris</i> | Cbp48732 | RLK | Other-RLK |
| <i>Capsella bursa-pastoris</i> | Cbp48734 | RLK | Other-RLK |
| <i>Capsella bursa-pastoris</i> | Cbp48946 | RLK | Other-RLK |
| <i>Capsella bursa-pastoris</i> | Cbp49001 | RLK | Other-RLK |
| <i>Capsella bursa-pastoris</i> | Cbp49033 | RLK | LRR       |
| <i>Capsella bursa-pastoris</i> | Cbp49034 | RLK | LRR       |
| <i>Capsella bursa-pastoris</i> | Cbp49054 | RLK | LRR       |
| <i>Capsella bursa-pastoris</i> | Cbp49095 | RLK | Other-RLK |
| <i>Capsella bursa-pastoris</i> | Cbp49097 | RLK | Other-RLK |
| <i>Capsella bursa-pastoris</i> | Cbp49189 | RLK | Other-RLK |
| <i>Capsella bursa-pastoris</i> | Cbp49191 | RLK | Other-RLK |
| <i>Capsella bursa-pastoris</i> | Cbp49193 | RLK | Other-RLK |
| <i>Capsella bursa-pastoris</i> | Cbp49216 | RLK | Other-RLK |
| <i>Capsella bursa-pastoris</i> | Cbp49244 | RLK | Other-RLK |
| <i>Capsella bursa-pastoris</i> | Cbp49312 | RLK | LRR       |
| <i>Capsella bursa-pastoris</i> | Cbp49370 | RLK | Other-RLK |
| <i>Capsella bursa-pastoris</i> | Cbp49461 | RLK | Other-RLK |
| <i>Capsella bursa-pastoris</i> | Cbp49609 | RLK | LRR       |
| <i>Capsella bursa-pastoris</i> | Cbp49735 | RLK | Other-RLK |
| <i>Capsella bursa-pastoris</i> | Cbp49757 | RLK | LRR       |
| <i>Capsella bursa-pastoris</i> | Cbp49810 | RLK | LRR       |
| <i>Capsella bursa-pastoris</i> | Cbp50057 | RLK | Other-RLK |
| <i>Capsella bursa-pastoris</i> | Cbp50096 | RLK | LRR       |
| <i>Capsella bursa-pastoris</i> | Cbp50149 | RLK | LRR       |
| <i>Capsella bursa-pastoris</i> | Cbp50197 | RLK | LRR       |
| <i>Capsella bursa-pastoris</i> | Cbp50222 | RLK | Other-RLK |
| <i>Capsella bursa-pastoris</i> | Cbp50250 | RLK | LRR       |
| <i>Capsella bursa-pastoris</i> | Cbp50262 | RLK | LRR       |

|                                |          |     |           |
|--------------------------------|----------|-----|-----------|
| <i>Capsella bursa-pastoris</i> | Cbp50347 | RLK | LRR       |
| <i>Capsella bursa-pastoris</i> | Cbp50612 | RLK | LRR       |
| <i>Capsella bursa-pastoris</i> | Cbp50624 | RLK | Other-RLK |
| <i>Capsella bursa-pastoris</i> | Cbp50730 | RLK | LRR       |
| <i>Capsella bursa-pastoris</i> | Cbp50750 | RLK | LRR       |
| <i>Capsella bursa-pastoris</i> | Cbp50757 | RLK | Other-RLK |
| <i>Capsella bursa-pastoris</i> | Cbp50782 | RLK | Other-RLK |
| <i>Capsella bursa-pastoris</i> | Cbp50922 | RLK | Other-RLK |
| <i>Capsella bursa-pastoris</i> | Cbp50930 | RLK | LRR       |
| <i>Capsella bursa-pastoris</i> | Cbp50952 | RLK | LRR       |
| <i>Capsella bursa-pastoris</i> | Cbp51058 | RLK | Other-RLK |
| <i>Capsella bursa-pastoris</i> | Cbp51117 | RLK | LRR       |
| <i>Capsella bursa-pastoris</i> | Cbp51156 | RLK | Other-RLK |
| <i>Capsella bursa-pastoris</i> | Cbp51195 | RLK | Other-RLK |
| <i>Capsella bursa-pastoris</i> | Cbp51196 | RLK | Other-RLK |
| <i>Capsella bursa-pastoris</i> | Cbp51205 | RLK | LRR       |
| <i>Capsella bursa-pastoris</i> | Cbp51226 | RLK | Other-RLK |
| <i>Capsella bursa-pastoris</i> | Cbp51233 | RLK | Other-RLK |
| <i>Capsella bursa-pastoris</i> | Cbp51338 | RLK | LRR       |
| <i>Capsella bursa-pastoris</i> | Cbp51403 | RLK | Other-RLK |
| <i>Capsella bursa-pastoris</i> | Cbp51434 | RLK | Other-RLK |
| <i>Capsella bursa-pastoris</i> | Cbp51542 | RLK | Other-RLK |
| <i>Capsella bursa-pastoris</i> | Cbp51556 | RLK | Other-RLK |
| <i>Capsella bursa-pastoris</i> | Cbp51565 | RLK | LRR       |
| <i>Capsella bursa-pastoris</i> | Cbp51643 | RLK | Other-RLK |
| <i>Capsella bursa-pastoris</i> | Cbp51650 | RLK | Other-RLK |
| <i>Capsella bursa-pastoris</i> | Cbp51685 | RLK | Other-RLK |
| <i>Capsella bursa-pastoris</i> | Cbp51879 | RLK | Other-RLK |
| <i>Capsella bursa-pastoris</i> | Cbp51905 | RLK | LRR       |
| <i>Capsella bursa-pastoris</i> | Cbp52016 | RLK | LRR       |
| <i>Capsella bursa-pastoris</i> | Cbp52032 | RLK | LRR       |
| <i>Capsella bursa-pastoris</i> | Cbp5216  | RLK | LRR       |
| <i>Capsella bursa-pastoris</i> | Cbp52181 | RLK | Other-RLK |
| <i>Capsella bursa-pastoris</i> | Cbp52311 | RLK | Other-RLK |
| <i>Capsella bursa-pastoris</i> | Cbp52489 | RLK | Other-RLK |
| <i>Capsella bursa-pastoris</i> | Cbp52680 | RLK | Other-RLK |
| <i>Capsella bursa-pastoris</i> | Cbp52747 | RLK | Other-RLK |
| <i>Capsella bursa-pastoris</i> | Cbp52887 | RLK | Other-RLK |
| <i>Capsella bursa-pastoris</i> | Cbp5293  | RLK | LRR       |
| <i>Capsella bursa-pastoris</i> | Cbp52944 | RLK | Other-RLK |
| <i>Capsella bursa-pastoris</i> | Cbp53010 | RLK | Other-RLK |
| <i>Capsella bursa-pastoris</i> | Cbp53011 | RLK | Other-RLK |
| <i>Capsella bursa-pastoris</i> | Cbp53012 | RLK | Other-RLK |
| <i>Capsella bursa-pastoris</i> | Cbp53013 | RLK | Other-RLK |
| <i>Capsella bursa-pastoris</i> | Cbp53019 | RLK | Other-RLK |
| <i>Capsella bursa-pastoris</i> | Cbp53023 | RLK | Other-RLK |
| <i>Capsella bursa-pastoris</i> | Cbp53105 | RLK | Other-RLK |
| <i>Capsella bursa-pastoris</i> | Cbp53195 | RLK | LRR       |
| <i>Capsella bursa-pastoris</i> | Cbp53260 | RLK | LRR       |
| <i>Capsella bursa-pastoris</i> | Cbp53291 | RLK | Other-RLK |
| <i>Capsella bursa-pastoris</i> | Cbp53343 | RLK | LRR       |
| <i>Capsella bursa-pastoris</i> | Cbp53378 | RLK | LRR       |
| <i>Capsella bursa-pastoris</i> | Cbp5357  | RLK | LRR       |
| <i>Capsella bursa-pastoris</i> | Cbp5394  | RLK | LRR       |
| <i>Capsella bursa-pastoris</i> | Cbp5469  | RLK | Other-RLK |
| <i>Capsella bursa-pastoris</i> | Cbp5484  | RLK | LRR       |
| <i>Capsella bursa-pastoris</i> | Cbp5538  | RLK | Other-RLK |
| <i>Capsella bursa-pastoris</i> | Cbp5539  | RLK | Other-RLK |
| <i>Capsella bursa-pastoris</i> | Cbp5540  | RLK | Other-RLK |
| <i>Capsella bursa-pastoris</i> | Cbp5542  | RLK | Other-RLK |
| <i>Capsella bursa-pastoris</i> | Cbp5596  | RLK | Other-RLK |
| <i>Capsella bursa-pastoris</i> | Cbp5621  | RLK | Other-RLK |



|                                |         |     |           |
|--------------------------------|---------|-----|-----------|
| <i>Capsella bursa-pastoris</i> | Cbp5761 | RLK | Other-RLK |
| <i>Capsella bursa-pastoris</i> | Cbp5831 | RLK | LRR       |
| <i>Capsella bursa-pastoris</i> | Cbp5939 | RLK | Other-RLK |
| <i>Capsella bursa-pastoris</i> | Cbp6033 | RLK | LRR       |
| <i>Capsella bursa-pastoris</i> | Cbp6124 | RLK | LRR       |
| <i>Capsella bursa-pastoris</i> | Cbp6173 | RLK | LRR       |
| <i>Capsella bursa-pastoris</i> | Cbp6234 | RLK | Other-RLK |
| <i>Capsella bursa-pastoris</i> | Cbp6523 | RLK | Other-RLK |
| <i>Capsella bursa-pastoris</i> | Cbp6572 | RLK | Lysm      |
| <i>Capsella bursa-pastoris</i> | Cbp66   | RLK | Other-RLK |
| <i>Capsella bursa-pastoris</i> | Cbp67   | RLK | Other-RLK |
| <i>Capsella bursa-pastoris</i> | Cbp6725 | RLK | LRR       |
| <i>Capsella bursa-pastoris</i> | Cbp6747 | RLK | LRR       |
| <i>Capsella bursa-pastoris</i> | Cbp68   | RLK | Other-RLK |
| <i>Capsella bursa-pastoris</i> | Cbp6810 | RLK | LRR       |
| <i>Capsella bursa-pastoris</i> | Cbp6821 | RLK | Other-RLK |
| <i>Capsella bursa-pastoris</i> | Cbp6828 | RLK | LRR       |
| <i>Capsella bursa-pastoris</i> | Cbp6831 | RLK | LRR       |
| <i>Capsella bursa-pastoris</i> | Cbp6840 | RLK | LRR       |
| <i>Capsella bursa-pastoris</i> | Cbp685  | RLK | Other-RLK |
| <i>Capsella bursa-pastoris</i> | Cbp6905 | RLK | Other-RLK |
| <i>Capsella bursa-pastoris</i> | Cbp7008 | RLK | Other-RLK |
| <i>Capsella bursa-pastoris</i> | Cbp7038 | RLK | LRR       |
| <i>Capsella bursa-pastoris</i> | Cbp7104 | RLK | LRR       |
| <i>Capsella bursa-pastoris</i> | Cbp7236 | RLK | Other-RLK |
| <i>Capsella bursa-pastoris</i> | Cbp7274 | RLK | LRR       |
| <i>Capsella bursa-pastoris</i> | Cbp7300 | RLK | Other-RLK |
| <i>Capsella bursa-pastoris</i> | Cbp7390 | RLK | Other-RLK |
| <i>Capsella bursa-pastoris</i> | Cbp7413 | RLK | Other-RLK |
| <i>Capsella bursa-pastoris</i> | Cbp7583 | RLK | LRR       |
| <i>Capsella bursa-pastoris</i> | Cbp7644 | RLK | LRR       |
| <i>Capsella bursa-pastoris</i> | Cbp7661 | RLK | Other-RLK |
| <i>Capsella bursa-pastoris</i> | Cbp7793 | RLK | Other-RLK |
| <i>Capsella bursa-pastoris</i> | Cbp7807 | RLK | LRR       |
| <i>Capsella bursa-pastoris</i> | Cbp7824 | RLK | LRR       |
| <i>Capsella bursa-pastoris</i> | Cbp7909 | RLK | LRR       |
| <i>Capsella bursa-pastoris</i> | Cbp7971 | RLK | LRR       |
| <i>Capsella bursa-pastoris</i> | Cbp7972 | RLK | LRR       |
| <i>Capsella bursa-pastoris</i> | Cbp7974 | RLK | LRR       |
| <i>Capsella bursa-pastoris</i> | Cbp7984 | RLK | LRR       |
| <i>Capsella bursa-pastoris</i> | Cbp8067 | RLK | LRR       |
| <i>Capsella bursa-pastoris</i> | Cbp8084 | RLK | LRR       |
| <i>Capsella bursa-pastoris</i> | Cbp8360 | RLK | LRR       |
| <i>Capsella bursa-pastoris</i> | Cbp8395 | RLK | Other-RLK |
| <i>Capsella bursa-pastoris</i> | Cbp8580 | RLK | Other-RLK |
| <i>Capsella bursa-pastoris</i> | Cbp8598 | RLK | LRR       |
| <i>Capsella bursa-pastoris</i> | Cbp8649 | RLK | LRR       |
| <i>Capsella bursa-pastoris</i> | Cbp8671 | RLK | Other-RLK |
| <i>Capsella bursa-pastoris</i> | Cbp8696 | RLK | Other-RLK |
| <i>Capsella bursa-pastoris</i> | Cbp8697 | RLK | Other-RLK |
| <i>Capsella bursa-pastoris</i> | Cbp8698 | RLK | Other-RLK |
| <i>Capsella bursa-pastoris</i> | Cbp8699 | RLK | Other-RLK |
| <i>Capsella bursa-pastoris</i> | Cbp8701 | RLK | Other-RLK |
| <i>Capsella bursa-pastoris</i> | Cbp8702 | RLK | Other-RLK |
| <i>Capsella bursa-pastoris</i> | Cbp8703 | RLK | Other-RLK |
| <i>Capsella bursa-pastoris</i> | Cbp8704 | RLK | Other-RLK |
| <i>Capsella bursa-pastoris</i> | Cbp8706 | RLK | Other-RLK |
| <i>Capsella bursa-pastoris</i> | Cbp8707 | RLK | Other-RLK |
| <i>Capsella bursa-pastoris</i> | Cbp8708 | RLK | Other-RLK |
| <i>Capsella bursa-pastoris</i> | Cbp8709 | RLK | Other-RLK |
| <i>Capsella bursa-pastoris</i> | Cbp8711 | RLK | Other-RLK |
| <i>Capsella bursa-pastoris</i> | Cbp8712 | RLK | Other-RLK |

|                                |          |     |           |
|--------------------------------|----------|-----|-----------|
| <i>Capsella bursa-pastoris</i> | Cbp8713  | RLK | Other-RLK |
| <i>Capsella bursa-pastoris</i> | Cbp8714  | RLK | Other-RLK |
| <i>Capsella bursa-pastoris</i> | Cbp8715  | RLK | Other-RLK |
| <i>Capsella bursa-pastoris</i> | Cbp8758  | RLK | LRR       |
| <i>Capsella bursa-pastoris</i> | Cbp8888  | RLK | LRR       |
| <i>Capsella bursa-pastoris</i> | Cbp8968  | RLK | LRR       |
| <i>Capsella bursa-pastoris</i> | Cbp9020  | RLK | Other-RLK |
| <i>Capsella bursa-pastoris</i> | Cbp9044  | RLK | Other-RLK |
| <i>Capsella bursa-pastoris</i> | Cbp9045  | RLK | Other-RLK |
| <i>Capsella bursa-pastoris</i> | Cbp9046  | RLK | Other-RLK |
| <i>Capsella bursa-pastoris</i> | Cbp9095  | RLK | Other-RLK |
| <i>Capsella bursa-pastoris</i> | Cbp9217  | RLK | LRR       |
| <i>Capsella bursa-pastoris</i> | Cbp9297  | RLK | LRR       |
| <i>Capsella bursa-pastoris</i> | Cbp9344  | RLK | Other-RLK |
| <i>Capsella bursa-pastoris</i> | Cbp9655  | RLK | LRR       |
| <i>Capsella bursa-pastoris</i> | Cbp989   | RLK | Other-RLK |
| <i>Capsella bursa-pastoris</i> | Cbp991   | RLK | LRR       |
| <i>Capsella bursa-pastoris</i> | Cbp9930  | RLK | Other-RLK |
| <i>Capsella bursa-pastoris</i> | Cbp996   | RLK | Other-RLK |
| <i>Capsella bursa-pastoris</i> | Cbp9961  | RLK | Other-RLK |
| <i>Capsella bursa-pastoris</i> | Cbp9966  | RLK | LRR       |
| <i>Capsella bursa-pastoris</i> | Cbp10091 | RLP | LRR       |
| <i>Capsella bursa-pastoris</i> | Cbp10094 | RLP | LRR       |
| <i>Capsella bursa-pastoris</i> | Cbp10097 | RLP | LRR       |
| <i>Capsella bursa-pastoris</i> | Cbp10098 | RLP | LRR       |
| <i>Capsella bursa-pastoris</i> | Cbp10100 | RLP | LRR       |
| <i>Capsella bursa-pastoris</i> | Cbp10101 | RLP | LRR       |
| <i>Capsella bursa-pastoris</i> | Cbp10313 | RLP | LRR       |
| <i>Capsella bursa-pastoris</i> | Cbp1042  | RLP | LRR       |
| <i>Capsella bursa-pastoris</i> | Cbp10857 | RLP | LRR       |
| <i>Capsella bursa-pastoris</i> | Cbp11544 | RLP | LRR       |
| <i>Capsella bursa-pastoris</i> | Cbp11711 | RLP | LRR       |
| <i>Capsella bursa-pastoris</i> | Cbp12014 | RLP | LRR       |
| <i>Capsella bursa-pastoris</i> | Cbp12346 | RLP | LRR       |
| <i>Capsella bursa-pastoris</i> | Cbp12350 | RLP | LRR       |
| <i>Capsella bursa-pastoris</i> | Cbp13087 | RLP | Lysm      |
| <i>Capsella bursa-pastoris</i> | Cbp1351  | RLP | LRR       |
| <i>Capsella bursa-pastoris</i> | Cbp13801 | RLP | LRR       |
| <i>Capsella bursa-pastoris</i> | Cbp14033 | RLP | LRR       |
| <i>Capsella bursa-pastoris</i> | Cbp14166 | RLP | LRR       |
| <i>Capsella bursa-pastoris</i> | Cbp14169 | RLP | LRR       |
| <i>Capsella bursa-pastoris</i> | Cbp14312 | RLP | LRR       |
| <i>Capsella bursa-pastoris</i> | Cbp14314 | RLP | LRR       |
| <i>Capsella bursa-pastoris</i> | Cbp14568 | RLP | LRR       |
| <i>Capsella bursa-pastoris</i> | Cbp14812 | RLP | Lysm      |
| <i>Capsella bursa-pastoris</i> | Cbp1501  | RLP | LRR       |
| <i>Capsella bursa-pastoris</i> | Cbp15125 | RLP | LRR       |
| <i>Capsella bursa-pastoris</i> | Cbp15744 | RLP | LRR       |
| <i>Capsella bursa-pastoris</i> | Cbp15925 | RLP | LRR       |
| <i>Capsella bursa-pastoris</i> | Cbp16010 | RLP | LRR       |
| <i>Capsella bursa-pastoris</i> | Cbp16977 | RLP | LRR       |
| <i>Capsella bursa-pastoris</i> | Cbp17498 | RLP | LRR       |
| <i>Capsella bursa-pastoris</i> | Cbp17520 | RLP | LRR       |
| <i>Capsella bursa-pastoris</i> | Cbp17717 | RLP | LRR       |
| <i>Capsella bursa-pastoris</i> | Cbp1801  | RLP | LRR       |
| <i>Capsella bursa-pastoris</i> | Cbp1830  | RLP | LRR       |
| <i>Capsella bursa-pastoris</i> | Cbp18477 | RLP | LRR       |
| <i>Capsella bursa-pastoris</i> | Cbp18916 | RLP | LRR       |
| <i>Capsella bursa-pastoris</i> | Cbp19186 | RLP | LRR       |
| <i>Capsella bursa-pastoris</i> | Cbp19486 | RLP | LRR       |
| <i>Capsella bursa-pastoris</i> | Cbp19607 | RLP | LRR       |
| <i>Capsella bursa-pastoris</i> | Cbp19763 | RLP | LRR       |

|                                |          |     |      |
|--------------------------------|----------|-----|------|
| <i>Capsella bursa-pastoris</i> | Cbp20084 | RLP | LRR  |
| <i>Capsella bursa-pastoris</i> | Cbp20261 | RLP | LRR  |
| <i>Capsella bursa-pastoris</i> | Cbp20439 | RLP | LRR  |
| <i>Capsella bursa-pastoris</i> | Cbp20445 | RLP | LRR  |
| <i>Capsella bursa-pastoris</i> | Cbp20661 | RLP | LRR  |
| <i>Capsella bursa-pastoris</i> | Cbp21168 | RLP | LRR  |
| <i>Capsella bursa-pastoris</i> | Cbp21211 | RLP | LRR  |
| <i>Capsella bursa-pastoris</i> | Cbp21504 | RLP | LRR  |
| <i>Capsella bursa-pastoris</i> | Cbp23118 | RLP | LRR  |
| <i>Capsella bursa-pastoris</i> | Cbp24785 | RLP | LRR  |
| <i>Capsella bursa-pastoris</i> | Cbp24792 | RLP | LRR  |
| <i>Capsella bursa-pastoris</i> | Cbp25274 | RLP | LRR  |
| <i>Capsella bursa-pastoris</i> | Cbp2531  | RLP | LRR  |
| <i>Capsella bursa-pastoris</i> | Cbp2534  | RLP | LRR  |
| <i>Capsella bursa-pastoris</i> | Cbp2538  | RLP | LRR  |
| <i>Capsella bursa-pastoris</i> | Cbp2540  | RLP | LRR  |
| <i>Capsella bursa-pastoris</i> | Cbp25545 | RLP | LRR  |
| <i>Capsella bursa-pastoris</i> | Cbp25706 | RLP | LRR  |
| <i>Capsella bursa-pastoris</i> | Cbp26867 | RLP | LRR  |
| <i>Capsella bursa-pastoris</i> | Cbp26915 | RLP | LRR  |
| <i>Capsella bursa-pastoris</i> | Cbp26937 | RLP | LRR  |
| <i>Capsella bursa-pastoris</i> | Cbp27048 | RLP | LRR  |
| <i>Capsella bursa-pastoris</i> | Cbp27226 | RLP | LRR  |
| <i>Capsella bursa-pastoris</i> | Cbp27804 | RLP | Lysm |
| <i>Capsella bursa-pastoris</i> | Cbp28040 | RLP | LRR  |
| <i>Capsella bursa-pastoris</i> | Cbp28068 | RLP | LRR  |
| <i>Capsella bursa-pastoris</i> | Cbp28449 | RLP | LRR  |
| <i>Capsella bursa-pastoris</i> | Cbp28518 | RLP | LRR  |
| <i>Capsella bursa-pastoris</i> | Cbp28870 | RLP | LRR  |
| <i>Capsella bursa-pastoris</i> | Cbp29378 | RLP | LRR  |
| <i>Capsella bursa-pastoris</i> | Cbp30375 | RLP | LRR  |
| <i>Capsella bursa-pastoris</i> | Cbp30385 | RLP | LRR  |
| <i>Capsella bursa-pastoris</i> | Cbp30795 | RLP | LRR  |
| <i>Capsella bursa-pastoris</i> | Cbp31077 | RLP | LRR  |
| <i>Capsella bursa-pastoris</i> | Cbp31300 | RLP | LRR  |
| <i>Capsella bursa-pastoris</i> | Cbp31953 | RLP | LRR  |
| <i>Capsella bursa-pastoris</i> | Cbp31954 | RLP | LRR  |
| <i>Capsella bursa-pastoris</i> | Cbp31968 | RLP | LRR  |
| <i>Capsella bursa-pastoris</i> | Cbp32383 | RLP | LRR  |
| <i>Capsella bursa-pastoris</i> | Cbp32559 | RLP | LRR  |
| <i>Capsella bursa-pastoris</i> | Cbp32753 | RLP | LRR  |
| <i>Capsella bursa-pastoris</i> | Cbp32754 | RLP | LRR  |
| <i>Capsella bursa-pastoris</i> | Cbp32755 | RLP | LRR  |
| <i>Capsella bursa-pastoris</i> | Cbp33361 | RLP | LRR  |
| <i>Capsella bursa-pastoris</i> | Cbp33476 | RLP | LRR  |
| <i>Capsella bursa-pastoris</i> | Cbp34170 | RLP | LRR  |
| <i>Capsella bursa-pastoris</i> | Cbp34354 | RLP | LRR  |
| <i>Capsella bursa-pastoris</i> | Cbp35198 | RLP | LRR  |
| <i>Capsella bursa-pastoris</i> | Cbp35582 | RLP | LRR  |
| <i>Capsella bursa-pastoris</i> | Cbp36183 | RLP | LRR  |
| <i>Capsella bursa-pastoris</i> | Cbp3640  | RLP | LRR  |
| <i>Capsella bursa-pastoris</i> | Cbp36410 | RLP | LRR  |
| <i>Capsella bursa-pastoris</i> | Cbp36452 | RLP | LRR  |
| <i>Capsella bursa-pastoris</i> | Cbp36938 | RLP | LRR  |
| <i>Capsella bursa-pastoris</i> | Cbp36940 | RLP | LRR  |
| <i>Capsella bursa-pastoris</i> | Cbp36941 | RLP | LRR  |
| <i>Capsella bursa-pastoris</i> | Cbp36942 | RLP | LRR  |
| <i>Capsella bursa-pastoris</i> | Cbp36944 | RLP | LRR  |
| <i>Capsella bursa-pastoris</i> | Cbp37121 | RLP | LRR  |
| <i>Capsella bursa-pastoris</i> | Cbp37122 | RLP | LRR  |
| <i>Capsella bursa-pastoris</i> | Cbp37500 | RLP | LRR  |
| <i>Capsella bursa-pastoris</i> | Cbp3783  | RLP | LRR  |

|                                |          |     |     |
|--------------------------------|----------|-----|-----|
| <i>Capsella bursa-pastoris</i> | Cbp37927 | RLP | LRR |
| <i>Capsella bursa-pastoris</i> | Cbp38218 | RLP | LRR |
| <i>Capsella bursa-pastoris</i> | Cbp3824  | RLP | LRR |
| <i>Capsella bursa-pastoris</i> | Cbp38575 | RLP | LRR |
| <i>Capsella bursa-pastoris</i> | Cbp39366 | RLP | LRR |
| <i>Capsella bursa-pastoris</i> | Cbp39423 | RLP | LRR |
| <i>Capsella bursa-pastoris</i> | Cbp39427 | RLP | LRR |
| <i>Capsella bursa-pastoris</i> | Cbp3946  | RLP | LRR |
| <i>Capsella bursa-pastoris</i> | Cbp39871 | RLP | LRR |
| <i>Capsella bursa-pastoris</i> | Cbp39953 | RLP | LRR |
| <i>Capsella bursa-pastoris</i> | Cbp40390 | RLP | LRR |
| <i>Capsella bursa-pastoris</i> | Cbp40391 | RLP | LRR |
| <i>Capsella bursa-pastoris</i> | Cbp4047  | RLP | LRR |
| <i>Capsella bursa-pastoris</i> | Cbp4055  | RLP | LRR |
| <i>Capsella bursa-pastoris</i> | Cbp4056  | RLP | LRR |
| <i>Capsella bursa-pastoris</i> | Cbp4057  | RLP | LRR |
| <i>Capsella bursa-pastoris</i> | Cbp40579 | RLP | LRR |
| <i>Capsella bursa-pastoris</i> | Cbp4058  | RLP | LRR |
| <i>Capsella bursa-pastoris</i> | Cbp4059  | RLP | LRR |
| <i>Capsella bursa-pastoris</i> | Cbp40594 | RLP | LRR |
| <i>Capsella bursa-pastoris</i> | Cbp4060  | RLP | LRR |
| <i>Capsella bursa-pastoris</i> | Cbp40774 | RLP | LRR |
| <i>Capsella bursa-pastoris</i> | Cbp41264 | RLP | LRR |
| <i>Capsella bursa-pastoris</i> | Cbp41308 | RLP | LRR |
| <i>Capsella bursa-pastoris</i> | Cbp41869 | RLP | LRR |
| <i>Capsella bursa-pastoris</i> | Cbp42143 | RLP | LRR |
| <i>Capsella bursa-pastoris</i> | Cbp42217 | RLP | LRR |
| <i>Capsella bursa-pastoris</i> | Cbp42488 | RLP | LRR |
| <i>Capsella bursa-pastoris</i> | Cbp42492 | RLP | LRR |
| <i>Capsella bursa-pastoris</i> | Cbp42555 | RLP | LRR |
| <i>Capsella bursa-pastoris</i> | Cbp42686 | RLP | LRR |
| <i>Capsella bursa-pastoris</i> | Cbp4279  | RLP | LRR |
| <i>Capsella bursa-pastoris</i> | Cbp42975 | RLP | LRR |
| <i>Capsella bursa-pastoris</i> | Cbp4323  | RLP | LRR |
| <i>Capsella bursa-pastoris</i> | Cbp43827 | RLP | LRR |
| <i>Capsella bursa-pastoris</i> | Cbp44101 | RLP | LRR |
| <i>Capsella bursa-pastoris</i> | Cbp44116 | RLP | LRR |
| <i>Capsella bursa-pastoris</i> | Cbp44492 | RLP | LRR |
| <i>Capsella bursa-pastoris</i> | Cbp45436 | RLP | LRR |
| <i>Capsella bursa-pastoris</i> | Cbp45462 | RLP | LRR |
| <i>Capsella bursa-pastoris</i> | Cbp45463 | RLP | LRR |
| <i>Capsella bursa-pastoris</i> | Cbp45769 | RLP | LRR |
| <i>Capsella bursa-pastoris</i> | Cbp45770 | RLP | LRR |
| <i>Capsella bursa-pastoris</i> | Cbp45904 | RLP | LRR |
| <i>Capsella bursa-pastoris</i> | Cbp46646 | RLP | LRR |
| <i>Capsella bursa-pastoris</i> | Cbp46751 | RLP | LRR |
| <i>Capsella bursa-pastoris</i> | Cbp46755 | RLP | LRR |
| <i>Capsella bursa-pastoris</i> | Cbp47252 | RLP | LRR |
| <i>Capsella bursa-pastoris</i> | Cbp47415 | RLP | LRR |
| <i>Capsella bursa-pastoris</i> | Cbp47438 | RLP | LRR |
| <i>Capsella bursa-pastoris</i> | Cbp47907 | RLP | LRR |
| <i>Capsella bursa-pastoris</i> | Cbp48108 | RLP | LRR |
| <i>Capsella bursa-pastoris</i> | Cbp48636 | RLP | LRR |
| <i>Capsella bursa-pastoris</i> | Cbp48744 | RLP | LRR |
| <i>Capsella bursa-pastoris</i> | Cbp48845 | RLP | LRR |
| <i>Capsella bursa-pastoris</i> | Cbp49817 | RLP | LRR |
| <i>Capsella bursa-pastoris</i> | Cbp5035  | RLP | LRR |
| <i>Capsella bursa-pastoris</i> | Cbp5057  | RLP | LRR |
| <i>Capsella bursa-pastoris</i> | Cbp5067  | RLP | LRR |
| <i>Capsella bursa-pastoris</i> | Cbp50773 | RLP | LRR |
| <i>Capsella bursa-pastoris</i> | Cbp50906 | RLP | LRR |
| <i>Capsella bursa-pastoris</i> | Cbp51141 | RLP | LRR |

|                                |              |     |     |
|--------------------------------|--------------|-----|-----|
| <i>Capsella bursa-pastoris</i> | Cbp5197      | RLP | LRR |
| <i>Capsella bursa-pastoris</i> | Cbp52377     | RLP | LRR |
| <i>Capsella bursa-pastoris</i> | Cbp52378     | RLP | LRR |
| <i>Capsella bursa-pastoris</i> | Cbp52423     | RLP | LRR |
| <i>Capsella bursa-pastoris</i> | Cbp52571     | RLP | LRR |
| <i>Capsella bursa-pastoris</i> | Cbp52577     | RLP | LRR |
| <i>Capsella bursa-pastoris</i> | Cbp52579     | RLP | LRR |
| <i>Capsella bursa-pastoris</i> | Cbp52785     | RLP | LRR |
| <i>Capsella bursa-pastoris</i> | Cbp52787     | RLP | LRR |
| <i>Capsella bursa-pastoris</i> | Cbp52982     | RLP | LRR |
| <i>Capsella bursa-pastoris</i> | Cbp52983     | RLP | LRR |
| <i>Capsella bursa-pastoris</i> | Cbp53470     | RLP | LRR |
| <i>Capsella bursa-pastoris</i> | Cbp53472     | RLP | LRR |
| <i>Capsella bursa-pastoris</i> | Cbp5525      | RLP | LRR |
| <i>Capsella bursa-pastoris</i> | Cbp5526      | RLP | LRR |
| <i>Capsella bursa-pastoris</i> | Cbp6319      | RLP | LRR |
| <i>Capsella bursa-pastoris</i> | Cbp6620      | RLP | LRR |
| <i>Capsella bursa-pastoris</i> | Cbp6654      | RLP | LRR |
| <i>Capsella bursa-pastoris</i> | Cbp6658      | RLP | LRR |
| <i>Capsella bursa-pastoris</i> | Cbp7339      | RLP | LRR |
| <i>Capsella bursa-pastoris</i> | Cbp7586      | RLP | LRR |
| <i>Capsella bursa-pastoris</i> | Cbp7691      | RLP | LRR |
| <i>Capsella bursa-pastoris</i> | Cbp7692      | RLP | LRR |
| <i>Capsella bursa-pastoris</i> | Cbp8083      | RLP | LRR |
| <i>Capsella bursa-pastoris</i> | Cbp8111      | RLP | LRR |
| <i>Capsella bursa-pastoris</i> | Cbp8136      | RLP | LRR |
| <i>Capsella bursa-pastoris</i> | Cbp8400      | RLP | LRR |
| <i>Capsella bursa-pastoris</i> | Cbp8410      | RLP | LRR |
| <i>Capsella bursa-pastoris</i> | Cbp9261      | RLP | LRR |
| <i>Capsella bursa-pastoris</i> | Cbp9505      | RLP | LRR |
| <i>Capsella bursa-pastoris</i> | Cbp9533      | RLP | LRR |
| <i>Brassica cretica</i>        | KAF3515794.1 | NLR | CN  |
| <i>Brassica cretica</i>        | KAF3610902.1 | NLR | CN  |
| <i>Brassica cretica</i>        | KAF3532707.1 | NLR | CN  |
| <i>Brassica cretica</i>        | KAF3497108.1 | NLR | CN  |
| <i>Brassica cretica</i>        | KAF3495114.1 | NLR | CN  |
| <i>Brassica cretica</i>        | KAF3532451.1 | NLR | CN  |
| <i>Brassica cretica</i>        | KAF3577281.1 | NLR | CN  |
| <i>Brassica cretica</i>        | KAF3597557.1 | NLR | CN  |
| <i>Brassica cretica</i>        | KAF3498007.1 | NLR | CN  |
| <i>Brassica cretica</i>        | KAF3545115.1 | NLR | CN  |
| <i>Brassica cretica</i>        | KAF3517781.1 | NLR | CN  |
| <i>Brassica cretica</i>        | KAF3590472.1 | NLR | CN  |
| <i>Brassica cretica</i>        | KAF3517049.1 | NLR | CN  |
| <i>Brassica cretica</i>        | KAF3531071.1 | NLR | CNL |
| <i>Brassica cretica</i>        | KAF3531036.1 | NLR | CNL |
| <i>Brassica cretica</i>        | KAF3611428.1 | NLR | CNL |
| <i>Brassica cretica</i>        | KAF3516560.1 | NLR | CNL |
| <i>Brassica cretica</i>        | KAF3581220.1 | NLR | CNL |
| <i>Brassica cretica</i>        | KAF3497592.1 | NLR | CNL |
| <i>Brassica cretica</i>        | KAF3562989.1 | NLR | CNL |
| <i>Brassica cretica</i>        | KAF3596471.1 | NLR | CNL |
| <i>Brassica cretica</i>        | KAF3604874.1 | NLR | CNL |
| <i>Brassica cretica</i>        | KAF3531089.1 | NLR | CNL |
| <i>Brassica cretica</i>        | KAF3517760.1 | NLR | CNL |
| <i>Brassica cretica</i>        | KAF3516083.1 | NLR | CNL |
| <i>Brassica cretica</i>        | KAF3542362.1 | NLR | CNL |
| <i>Brassica cretica</i>        | KAF3521169.1 | NLR | CNL |
| <i>Brassica cretica</i>        | KAF3531129.1 | NLR | CNL |
| <i>Brassica cretica</i>        | KAF3596251.1 | NLR | CNL |
| <i>Brassica cretica</i>        | KAF3496834.1 | NLR | CNL |
| <i>Brassica cretica</i>        | KAF3550964.1 | NLR | CNL |

|                         |              |     |     |
|-------------------------|--------------|-----|-----|
| <i>Brassica cretica</i> | KAF3563011.1 | NLR | CNL |
| <i>Brassica cretica</i> | KAF3564177.1 | NLR | CNL |
| <i>Brassica cretica</i> | KAF3527492.1 | NLR | CNL |
| <i>Brassica cretica</i> | KAF3566285.1 | NLR | CNL |
| <i>Brassica cretica</i> | KAF3496263.1 | NLR | CNL |
| <i>Brassica cretica</i> | KAF3576107.1 | NLR | CNL |
| <i>Brassica cretica</i> | KAF3531911.1 | NLR | CNL |
| <i>Brassica cretica</i> | KAF3567412.1 | NLR | CNL |
| <i>Brassica cretica</i> | KAF3594269.1 | NLR | CNL |
| <i>Brassica cretica</i> | KAF3597564.1 | NLR | CNL |
| <i>Brassica cretica</i> | KAF3493463.1 | NLR | CNL |
| <i>Brassica cretica</i> | KAF3579304.1 | NLR | CNL |
| <i>Brassica cretica</i> | KAF3592429.1 | NLR | CNL |
| <i>Brassica cretica</i> | KAF3564692.1 | NLR | NBS |
| <i>Brassica cretica</i> | KAF3609115.1 | NLR | NBS |
| <i>Brassica cretica</i> | KAF3497482.1 | NLR | NBS |
| <i>Brassica cretica</i> | KAF3518230.1 | NLR | NBS |
| <i>Brassica cretica</i> | KAF3566195.1 | NLR | NBS |
| <i>Brassica cretica</i> | KAF3528543.1 | NLR | NBS |
| <i>Brassica cretica</i> | KAF3519003.1 | NLR | NBS |
| <i>Brassica cretica</i> | KAF3493296.1 | NLR | NBS |
| <i>Brassica cretica</i> | KAF3517048.1 | NLR | NBS |
| <i>Brassica cretica</i> | KAF3552568.1 | NLR | NBS |
| <i>Brassica cretica</i> | KAF3609116.1 | NLR | NBS |
| <i>Brassica cretica</i> | KAF3562520.1 | NLR | NBS |
| <i>Brassica cretica</i> | KAF3592482.1 | NLR | NBS |
| <i>Brassica cretica</i> | KAF3495510.1 | NLR | NBS |
| <i>Brassica cretica</i> | KAF3530560.1 | NLR | NBS |
| <i>Brassica cretica</i> | KAF3547007.1 | NLR | NBS |
| <i>Brassica cretica</i> | KAF3580003.1 | NLR | NBS |
| <i>Brassica cretica</i> | KAF3516960.1 | NLR | NBS |
| <i>Brassica cretica</i> | KAF3552164.1 | NLR | NBS |
| <i>Brassica cretica</i> | KAF3527232.1 | NLR | NBS |
| <i>Brassica cretica</i> | KAF3565479.1 | NLR | NBS |
| <i>Brassica cretica</i> | KAF3550114.1 | NLR | NBS |
| <i>Brassica cretica</i> | KAF3517766.1 | NLR | NBS |
| <i>Brassica cretica</i> | KAF3567523.1 | NLR | NBS |
| <i>Brassica cretica</i> | KAF3561286.1 | NLR | NBS |
| <i>Brassica cretica</i> | KAF3497488.1 | NLR | NBS |
| <i>Brassica cretica</i> | KAF3591862.1 | NLR | NBS |
| <i>Brassica cretica</i> | KAF3564888.1 | NLR | NBS |
| <i>Brassica cretica</i> | KAF3565695.1 | NLR | NL  |
| <i>Brassica cretica</i> | KAF3496302.1 | NLR | NL  |
| <i>Brassica cretica</i> | KAF3596191.1 | NLR | NL  |
| <i>Brassica cretica</i> | KAF3564697.1 | NLR | NL  |
| <i>Brassica cretica</i> | KAF3543640.1 | NLR | NL  |
| <i>Brassica cretica</i> | KAF3495506.1 | NLR | NL  |
| <i>Brassica cretica</i> | KAF3596196.1 | NLR | NL  |
| <i>Brassica cretica</i> | KAF3590505.1 | NLR | NL  |
| <i>Brassica cretica</i> | KAF3546785.1 | NLR | NL  |
| <i>Brassica cretica</i> | KAF3565073.1 | NLR | NL  |
| <i>Brassica cretica</i> | KAF3607697.1 | NLR | NL  |
| <i>Brassica cretica</i> | KAF3568705.1 | NLR | NL  |
| <i>Brassica cretica</i> | KAF3544173.1 | NLR | NL  |
| <i>Brassica cretica</i> | KAF3578869.1 | NLR | NL  |
| <i>Brassica cretica</i> | KAF3543398.1 | NLR | NL  |
| <i>Brassica cretica</i> | KAF3568473.1 | NLR | NL  |
| <i>Brassica cretica</i> | KAF3494519.1 | NLR | NL  |
| <i>Brassica cretica</i> | KAF3582276.1 | NLR | NL  |
| <i>Brassica cretica</i> | KAF3527319.1 | NLR | NL  |
| <i>Brassica cretica</i> | KAF3498255.1 | NLR | NL  |
| <i>Brassica cretica</i> | KAF3546528.1 | NLR | NL  |

|                         |              |     |           |
|-------------------------|--------------|-----|-----------|
| <i>Brassica cretica</i> | KAF3527233.1 | NLR | NL        |
| <i>Brassica cretica</i> | KAF3567325.1 | NLR | NL        |
| <i>Brassica cretica</i> | KAF3532710.1 | NLR | NL        |
| <i>Brassica cretica</i> | KAF3566504.1 | NLR | NL        |
| <i>Brassica cretica</i> | KAF3530454.1 | NLR | NL        |
| <i>Brassica cretica</i> | KAF3528549.1 | NLR | NL        |
| <i>Brassica cretica</i> | KAF3520289.1 | NLR | NL        |
| <i>Brassica cretica</i> | KAF3560671.1 | NLR | NL        |
| <i>Brassica cretica</i> | KAF3568104.1 | NLR | NL        |
| <i>Brassica cretica</i> | KAF3546722.1 | NLR | NL        |
| <i>Brassica cretica</i> | KAF3543048.1 | NLR | NL        |
| <i>Brassica cretica</i> | KAF3548145.1 | NLR | NL        |
| <i>Brassica cretica</i> | KAF3529291.1 | NLR | NL        |
| <i>Brassica cretica</i> | KAF3546097.1 | NLR | NL        |
| <i>Brassica cretica</i> | KAF3527235.1 | NLR | NL        |
| <i>Brassica cretica</i> | KAF3575497.1 | NLR | NL        |
| <i>Brassica cretica</i> | KAF3549348.1 | NLR | NL        |
| <i>Brassica cretica</i> | KAF3594610.1 | NLR | NL        |
| <i>Brassica cretica</i> | KAF3521170.1 | NLR | NL        |
| <i>Brassica cretica</i> | KAF3548547.1 | NLR | NL        |
| <i>Brassica cretica</i> | KAF3567875.1 | NLR | NL        |
| <i>Brassica cretica</i> | KAF3563457.1 | NLR | NL        |
| <i>Brassica cretica</i> | KAF3592220.1 | NLR | NL        |
| <i>Brassica cretica</i> | KAF3519034.1 | NLR | NL        |
| <i>Brassica cretica</i> | KAF3606031.1 | NLR | NL        |
| <i>Brassica cretica</i> | KAF3564885.1 | NLR | NL        |
| <i>Brassica cretica</i> | KAF3547008.1 | NLR | NL        |
| <i>Brassica cretica</i> | KAF3593132.1 | NLR | NL        |
| <i>Brassica cretica</i> | KAF3610903.1 | NLR | NL        |
| <i>Brassica cretica</i> | KAF3564691.1 | NLR | NL        |
| <i>Brassica cretica</i> | KAF3531620.1 | NLR | NL        |
| <i>Brassica cretica</i> | KAF3567302.1 | NLR | NL        |
| <i>Brassica cretica</i> | KAF3498111.1 | NLR | NL        |
| <i>Brassica cretica</i> | KAF3591671.1 | NLR | NL        |
| <i>Brassica cretica</i> | KAF3546786.1 | NLR | NL        |
| <i>Brassica cretica</i> | KAF3569282.1 | NLR | NL        |
| <i>Brassica cretica</i> | KAF3606819.1 | NLR | NL        |
| <i>Brassica cretica</i> | KAF3569280.1 | NLR | NL        |
| <i>Brassica cretica</i> | KAF3564113.1 | NLR | NL        |
| <i>Brassica cretica</i> | KAF3596919.1 | NLR | NL        |
| <i>Brassica cretica</i> | KAF3568451.1 | NLR | NL        |
| <i>Brassica cretica</i> | KAF3560565.1 | NLR | NL        |
| <i>Brassica cretica</i> | KAF3533427.1 | NLR | NL        |
| <i>Brassica cretica</i> | KAF3493888.1 | NLR | NL        |
| <i>Brassica cretica</i> | KAF3567662.1 | NLR | NL        |
| <i>Brassica cretica</i> | KAF3496261.1 | NLR | NL        |
| <i>Brassica cretica</i> | KAF3549138.1 | NLR | NL        |
| <i>Brassica cretica</i> | KAF3579404.1 | NLR | NL        |
| <i>Brassica cretica</i> | KAF3567395.1 | NLR | NL        |
| <i>Brassica cretica</i> | KAF3542303.1 | NLR | NL        |
| <i>Brassica cretica</i> | KAF3496083.1 | NLR | NL        |
| <i>Brassica cretica</i> | KAF3591133.1 | NLR | NL        |
| <i>Brassica cretica</i> | KAF3534215.1 | NLR | NL        |
| <i>Brassica cretica</i> | KAF3611537.1 | NLR | NL        |
| <i>Brassica cretica</i> | KAF3561134.1 | NLR | NL        |
| <i>Brassica cretica</i> | KAF3532444.1 | NLR | Other-NLR |
| <i>Brassica cretica</i> | KAF3595301.1 | NLR | Other-NLR |
| <i>Brassica cretica</i> | KAF3521051.1 | NLR | Other-NLR |
| <i>Brassica cretica</i> | KAF3496476.1 | NLR | Other-NLR |
| <i>Brassica cretica</i> | KAF3498623.1 | NLR | Other-NLR |
| <i>Brassica cretica</i> | KAF3547879.1 | NLR | Other-NLR |
| <i>Brassica cretica</i> | KAF3519002.1 | NLR | TN        |

|                         |              |     |     |
|-------------------------|--------------|-----|-----|
| <i>Brassica cretica</i> | KAF3543644.1 | NLR | TN  |
| <i>Brassica cretica</i> | KAF3580195.1 | NLR | TN  |
| <i>Brassica cretica</i> | KAF3611543.1 | NLR | TN  |
| <i>Brassica cretica</i> | KAF3547908.1 | NLR | TN  |
| <i>Brassica cretica</i> | KAF3567144.1 | NLR | TN  |
| <i>Brassica cretica</i> | KAF3542213.1 | NLR | TN  |
| <i>Brassica cretica</i> | KAF3517359.1 | NLR | TN  |
| <i>Brassica cretica</i> | KAF3519854.1 | NLR | TNL |
| <i>Brassica cretica</i> | KAF3552163.1 | NLR | TNL |
| <i>Brassica cretica</i> | KAF3607898.1 | NLR | TNL |
| <i>Brassica cretica</i> | KAF3575962.1 | NLR | TNL |
| <i>Brassica cretica</i> | KAF3591138.1 | NLR | TNL |
| <i>Brassica cretica</i> | KAF3564886.1 | NLR | TNL |
| <i>Brassica cretica</i> | KAF3594265.1 | NLR | TNL |
| <i>Brassica cretica</i> | KAF3596494.1 | NLR | TNL |
| <i>Brassica cretica</i> | KAF3580395.1 | NLR | TNL |
| <i>Brassica cretica</i> | KAF3519814.1 | NLR | TNL |
| <i>Brassica cretica</i> | KAF3528035.1 | NLR | TNL |
| <i>Brassica cretica</i> | KAF3564720.1 | NLR | TNL |
| <i>Brassica cretica</i> | KAF3549399.1 | NLR | TNL |
| <i>Brassica cretica</i> | KAF3493997.1 | NLR | TNL |
| <i>Brassica cretica</i> | KAF3564694.1 | NLR | TNL |
| <i>Brassica cretica</i> | KAF3593075.1 | NLR | TNL |
| <i>Brassica cretica</i> | KAF3517358.1 | NLR | TNL |
| <i>Brassica cretica</i> | KAF3593074.1 | NLR | TNL |
| <i>Brassica cretica</i> | KAF3578478.1 | NLR | TNL |
| <i>Brassica cretica</i> | KAF3544379.1 | NLR | TNL |
| <i>Brassica cretica</i> | KAF3593072.1 | NLR | TNL |
| <i>Brassica cretica</i> | KAF3530939.1 | NLR | TNL |
| <i>Brassica cretica</i> | KAF3564688.1 | NLR | TNL |
| <i>Brassica cretica</i> | KAF3533397.1 | NLR | TNL |
| <i>Brassica cretica</i> | KAF3493994.1 | NLR | TNL |
| <i>Brassica cretica</i> | KAF3566292.1 | NLR | TNL |
| <i>Brassica cretica</i> | KAF3496464.1 | NLR | TNL |
| <i>Brassica cretica</i> | KAF3542239.1 | NLR | TX  |
| <i>Brassica cretica</i> | KAF3516321.1 | NLR | TX  |
| <i>Brassica cretica</i> | KAF3590309.1 | NLR | TX  |
| <i>Brassica cretica</i> | KAF3611548.1 | NLR | TX  |
| <i>Brassica cretica</i> | KAF3594266.1 | NLR | TX  |
| <i>Brassica cretica</i> | KAF3563462.1 | NLR | TX  |
| <i>Brassica cretica</i> | KAF3531070.1 | NLR | TX  |
| <i>Brassica cretica</i> | KAF3516344.1 | NLR | TX  |
| <i>Brassica cretica</i> | KAF3611063.1 | NLR | TX  |
| <i>Brassica cretica</i> | KAF3533451.1 | NLR | TX  |
| <i>Brassica cretica</i> | KAF3533400.1 | NLR | TX  |
| <i>Brassica cretica</i> | KAF3575596.1 | NLR | TX  |
| <i>Brassica cretica</i> | KAF3518309.1 | NLR | TX  |
| <i>Brassica cretica</i> | KAF3521234.1 | NLR | TX  |
| <i>Brassica cretica</i> | KAF3543681.1 | NLR | TX  |
| <i>Brassica cretica</i> | KAF3563585.1 | NLR | TX  |
| <i>Brassica cretica</i> | KAF3542835.1 | NLR | TX  |
| <i>Brassica cretica</i> | KAF3593112.1 | NLR | TX  |
| <i>Brassica cretica</i> | KAF3533653.1 | NLR | TX  |
| <i>Brassica cretica</i> | KAF3568665.1 | NLR | TX  |
| <i>Brassica cretica</i> | KAF3604833.1 | NLR | TX  |
| <i>Brassica cretica</i> | KAF3533283.1 | NLR | TX  |
| <i>Brassica cretica</i> | KAF3563333.1 | NLR | TX  |
| <i>Brassica cretica</i> | KAF3528674.1 | NLR | TX  |
| <i>Brassica cretica</i> | KAF3595295.1 | NLR | TX  |
| <i>Brassica cretica</i> | KAF3550962.1 | NLR | TX  |
| <i>Brassica cretica</i> | KAF3565187.1 | NLR | TX  |
| <i>Brassica cretica</i> | KAF3590504.1 | NLR | TX  |



|                         |              |     |           |
|-------------------------|--------------|-----|-----------|
| <i>Brassica cretica</i> | KAF3593080.1 | NLR | TX        |
| <i>Brassica cretica</i> | KAF3594653.1 | NLR | TX        |
| <i>Brassica cretica</i> | KAF3498668.1 | NLR | TX        |
| <i>Brassica cretica</i> | KAF3563329.1 | NLR | TX        |
| <i>Brassica cretica</i> | KAF3533281.1 | NLR | TX        |
| <i>Brassica cretica</i> | KAF3564882.1 | NLR | TX        |
| <i>Brassica cretica</i> | KAF3549351.1 | NLR | TX        |
| <i>Brassica cretica</i> | KAF3493744.1 | NLR | TX        |
| <i>Brassica cretica</i> | KAF3550957.1 | NLR | TX        |
| <i>Brassica cretica</i> | KAF3610231.1 | NLR | TX        |
| <i>Brassica cretica</i> | KAF3561285.1 | NLR | TX        |
| <i>Brassica cretica</i> | KAF3534383.1 | NLR | TX        |
| <i>Brassica cretica</i> | KAF3548279.1 | NLR | TX        |
| <i>Brassica cretica</i> | KAF3492592.1 | RLK | Other-RLK |
| <i>Brassica cretica</i> | KAF3492596.1 | RLK | Other-RLK |
| <i>Brassica cretica</i> | KAF3492731.1 | RLK | Other-RLK |
| <i>Brassica cretica</i> | KAF3492733.1 | RLK | Other-RLK |
| <i>Brassica cretica</i> | KAF3492735.1 | RLK | Other-RLK |
| <i>Brassica cretica</i> | KAF3492745.1 | RLK | Other-RLK |
| <i>Brassica cretica</i> | KAF3492749.1 | RLK | LRR       |
| <i>Brassica cretica</i> | KAF3492751.1 | RLK | Other-RLK |
| <i>Brassica cretica</i> | KAF3492933.1 | RLK | Other-RLK |
| <i>Brassica cretica</i> | KAF3492934.1 | RLK | Other-RLK |
| <i>Brassica cretica</i> | KAF3492935.1 | RLK | Other-RLK |
| <i>Brassica cretica</i> | KAF3492967.1 | RLK | LRR       |
| <i>Brassica cretica</i> | KAF3493063.1 | RLK | LRR       |
| <i>Brassica cretica</i> | KAF3493186.1 | RLK | Other-RLK |
| <i>Brassica cretica</i> | KAF3493333.1 | RLK | Other-RLK |
| <i>Brassica cretica</i> | KAF3493439.1 | RLK | Other-RLK |
| <i>Brassica cretica</i> | KAF3493548.1 | RLK | Other-RLK |
| <i>Brassica cretica</i> | KAF3493574.1 | RLK | Other-RLK |
| <i>Brassica cretica</i> | KAF3493737.1 | RLK | Other-RLK |
| <i>Brassica cretica</i> | KAF3493818.1 | RLK | LRR       |
| <i>Brassica cretica</i> | KAF3493832.1 | RLK | LRR       |
| <i>Brassica cretica</i> | KAF3493920.1 | RLK | Other-RLK |
| <i>Brassica cretica</i> | KAF3493992.1 | RLK | Other-RLK |
| <i>Brassica cretica</i> | KAF3494148.1 | RLK | LRR       |
| <i>Brassica cretica</i> | KAF3494215.1 | RLK | Other-RLK |
| <i>Brassica cretica</i> | KAF3494425.1 | RLK | Other-RLK |
| <i>Brassica cretica</i> | KAF3494816.1 | RLK | Other-RLK |
| <i>Brassica cretica</i> | KAF3495290.1 | RLK | Other-RLK |
| <i>Brassica cretica</i> | KAF3495444.1 | RLK | Other-RLK |
| <i>Brassica cretica</i> | KAF3495473.1 | RLK | LRR       |
| <i>Brassica cretica</i> | KAF3495560.1 | RLK | Other-RLK |
| <i>Brassica cretica</i> | KAF3495581.1 | RLK | LRR       |
| <i>Brassica cretica</i> | KAF3495654.1 | RLK | Other-RLK |
| <i>Brassica cretica</i> | KAF3495756.1 | RLK | Other-RLK |
| <i>Brassica cretica</i> | KAF3495821.1 | RLK | Other-RLK |
| <i>Brassica cretica</i> | KAF3496003.1 | RLK | LRR       |
| <i>Brassica cretica</i> | KAF3496166.1 | RLK | Other-RLK |
| <i>Brassica cretica</i> | KAF3496194.1 | RLK | Other-RLK |
| <i>Brassica cretica</i> | KAF3496246.1 | RLK | Other-RLK |
| <i>Brassica cretica</i> | KAF3496353.1 | RLK | LRR       |
| <i>Brassica cretica</i> | KAF3496397.1 | RLK | Other-RLK |
| <i>Brassica cretica</i> | KAF3496550.1 | RLK | Other-RLK |
| <i>Brassica cretica</i> | KAF3496579.1 | RLK | Other-RLK |
| <i>Brassica cretica</i> | KAF3496870.1 | RLK | Other-RLK |
| <i>Brassica cretica</i> | KAF3496930.1 | RLK | Other-RLK |
| <i>Brassica cretica</i> | KAF3497023.1 | RLK | LRR       |
| <i>Brassica cretica</i> | KAF3497077.1 | RLK | LRR       |
| <i>Brassica cretica</i> | KAF3497083.1 | RLK | LRR       |
| <i>Brassica cretica</i> | KAF3497287.1 | RLK | Other-RLK |

|                         |              |     |           |
|-------------------------|--------------|-----|-----------|
| <i>Brassica cretica</i> | KAF3497563.1 | RLK | LRR       |
| <i>Brassica cretica</i> | KAF3497701.1 | RLK | LRR       |
| <i>Brassica cretica</i> | KAF3497883.1 | RLK | Other-RLK |
| <i>Brassica cretica</i> | KAF3498026.1 | RLK | LRR       |
| <i>Brassica cretica</i> | KAF3498202.1 | RLK | Other-RLK |
| <i>Brassica cretica</i> | KAF3498249.1 | RLK | Other-RLK |
| <i>Brassica cretica</i> | KAF3498264.1 | RLK | Other-RLK |
| <i>Brassica cretica</i> | KAF3498289.1 | RLK | Other-RLK |
| <i>Brassica cretica</i> | KAF3498418.1 | RLK | Other-RLK |
| <i>Brassica cretica</i> | KAF3498621.1 | RLK | Other-RLK |
| <i>Brassica cretica</i> | KAF3498651.1 | RLK | Other-RLK |
| <i>Brassica cretica</i> | KAF3498652.1 | RLK | Other-RLK |
| <i>Brassica cretica</i> | KAF3498693.1 | RLK | Other-RLK |
| <i>Brassica cretica</i> | KAF3498694.1 | RLK | Other-RLK |
| <i>Brassica cretica</i> | KAF3498700.1 | RLK | Other-RLK |
| <i>Brassica cretica</i> | KAF3498799.1 | RLK | Other-RLK |
| <i>Brassica cretica</i> | KAF3498892.1 | RLK | Other-RLK |
| <i>Brassica cretica</i> | KAF3498899.1 | RLK | Other-RLK |
| <i>Brassica cretica</i> | KAF3515676.1 | RLK | LRR       |
| <i>Brassica cretica</i> | KAF3515833.1 | RLK | LRR       |
| <i>Brassica cretica</i> | KAF3515929.1 | RLK | LRR       |
| <i>Brassica cretica</i> | KAF3516086.1 | RLK | Other-RLK |
| <i>Brassica cretica</i> | KAF3516499.1 | RLK | Other-RLK |
| <i>Brassica cretica</i> | KAF3516545.1 | RLK | Other-RLK |
| <i>Brassica cretica</i> | KAF3516572.1 | RLK | LRR       |
| <i>Brassica cretica</i> | KAF3516952.1 | RLK | LRR       |
| <i>Brassica cretica</i> | KAF3516999.1 | RLK | LRR       |
| <i>Brassica cretica</i> | KAF3517164.1 | RLK | LRR       |
| <i>Brassica cretica</i> | KAF3517169.1 | RLK | LRR       |
| <i>Brassica cretica</i> | KAF3517170.1 | RLK | LRR       |
| <i>Brassica cretica</i> | KAF3517306.1 | RLK | LRR       |
| <i>Brassica cretica</i> | KAF3517595.1 | RLK | LRR       |
| <i>Brassica cretica</i> | KAF3517682.1 | RLK | Other-RLK |
| <i>Brassica cretica</i> | KAF3517683.1 | RLK | Other-RLK |
| <i>Brassica cretica</i> | KAF3517711.1 | RLK | Other-RLK |
| <i>Brassica cretica</i> | KAF3517820.1 | RLK | Other-RLK |
| <i>Brassica cretica</i> | KAF3518026.1 | RLK | Other-RLK |
| <i>Brassica cretica</i> | KAF3518185.1 | RLK | LRR       |
| <i>Brassica cretica</i> | KAF3518237.1 | RLK | LRR       |
| <i>Brassica cretica</i> | KAF3518269.1 | RLK | LRR       |
| <i>Brassica cretica</i> | KAF3518354.1 | RLK | Other-RLK |
| <i>Brassica cretica</i> | KAF3518437.1 | RLK | LRR       |
| <i>Brassica cretica</i> | KAF3518606.1 | RLK | Other-RLK |
| <i>Brassica cretica</i> | KAF3518747.1 | RLK | LRR       |
| <i>Brassica cretica</i> | KAF3518923.1 | RLK | Other-RLK |
| <i>Brassica cretica</i> | KAF3518960.1 | RLK | Other-RLK |
| <i>Brassica cretica</i> | KAF3519129.1 | RLK | Other-RLK |
| <i>Brassica cretica</i> | KAF3519277.1 | RLK | Other-RLK |
| <i>Brassica cretica</i> | KAF3519392.1 | RLK | Other-RLK |
| <i>Brassica cretica</i> | KAF3519407.1 | RLK | Other-RLK |
| <i>Brassica cretica</i> | KAF3519770.1 | RLK | Other-RLK |
| <i>Brassica cretica</i> | KAF3519793.1 | RLK | Other-RLK |
| <i>Brassica cretica</i> | KAF3519811.1 | RLK | LRR       |
| <i>Brassica cretica</i> | KAF3519887.1 | RLK | LRR       |
| <i>Brassica cretica</i> | KAF3519919.1 | RLK | Other-RLK |
| <i>Brassica cretica</i> | KAF3519941.1 | RLK | LRR       |
| <i>Brassica cretica</i> | KAF3520061.1 | RLK | Other-RLK |
| <i>Brassica cretica</i> | KAF3520244.1 | RLK | LRR       |
| <i>Brassica cretica</i> | KAF3520406.1 | RLK | LRR       |
| <i>Brassica cretica</i> | KAF3520527.1 | RLK | Other-RLK |
| <i>Brassica cretica</i> | KAF3520640.1 | RLK | Lysm      |
| <i>Brassica cretica</i> | KAF3520641.1 | RLK | Other-RLK |

|                         |              |     |           |
|-------------------------|--------------|-----|-----------|
| <i>Brassica cretica</i> | KAF3520776.1 | RLK | LRR       |
| <i>Brassica cretica</i> | KAF3520930.1 | RLK | Other-RLK |
| <i>Brassica cretica</i> | KAF3520948.1 | RLK | Other-RLK |
| <i>Brassica cretica</i> | KAF3521057.1 | RLK | Other-RLK |
| <i>Brassica cretica</i> | KAF3527320.1 | RLK | Other-RLK |
| <i>Brassica cretica</i> | KAF3527321.1 | RLK | Other-RLK |
| <i>Brassica cretica</i> | KAF3527324.1 | RLK | Other-RLK |
| <i>Brassica cretica</i> | KAF3527376.1 | RLK | Other-RLK |
| <i>Brassica cretica</i> | KAF3527487.1 | RLK | LRR       |
| <i>Brassica cretica</i> | KAF3527555.1 | RLK | LRR       |
| <i>Brassica cretica</i> | KAF3528003.1 | RLK | Other-RLK |
| <i>Brassica cretica</i> | KAF3528024.1 | RLK | Other-RLK |
| <i>Brassica cretica</i> | KAF3528097.1 | RLK | Other-RLK |
| <i>Brassica cretica</i> | KAF3528149.1 | RLK | Other-RLK |
| <i>Brassica cretica</i> | KAF3528741.1 | RLK | LRR       |
| <i>Brassica cretica</i> | KAF3528749.1 | RLK | Other-RLK |
| <i>Brassica cretica</i> | KAF3528879.1 | RLK | Other-RLK |
| <i>Brassica cretica</i> | KAF3528964.1 | RLK | LRR       |
| <i>Brassica cretica</i> | KAF3529063.1 | RLK | LRR       |
| <i>Brassica cretica</i> | KAF3529220.1 | RLK | Other-RLK |
| <i>Brassica cretica</i> | KAF3529224.1 | RLK | Other-RLK |
| <i>Brassica cretica</i> | KAF3529305.1 | RLK | LRR       |
| <i>Brassica cretica</i> | KAF3529346.1 | RLK | LRR       |
| <i>Brassica cretica</i> | KAF3529350.1 | RLK | Other-RLK |
| <i>Brassica cretica</i> | KAF3529368.1 | RLK | Other-RLK |
| <i>Brassica cretica</i> | KAF3529401.1 | RLK | Other-RLK |
| <i>Brassica cretica</i> | KAF3529402.1 | RLK | Other-RLK |
| <i>Brassica cretica</i> | KAF3529537.1 | RLK | Other-RLK |
| <i>Brassica cretica</i> | KAF3529538.1 | RLK | Other-RLK |
| <i>Brassica cretica</i> | KAF3529579.1 | RLK | Other-RLK |
| <i>Brassica cretica</i> | KAF3529641.1 | RLK | Other-RLK |
| <i>Brassica cretica</i> | KAF3529669.1 | RLK | Other-RLK |
| <i>Brassica cretica</i> | KAF3529787.1 | RLK | Other-RLK |
| <i>Brassica cretica</i> | KAF3530016.1 | RLK | Other-RLK |
| <i>Brassica cretica</i> | KAF3530206.1 | RLK | LRR       |
| <i>Brassica cretica</i> | KAF3530240.1 | RLK | LRR       |
| <i>Brassica cretica</i> | KAF3530338.1 | RLK | LRR       |
| <i>Brassica cretica</i> | KAF3530401.1 | RLK | Other-RLK |
| <i>Brassica cretica</i> | KAF3530412.1 | RLK | LRR       |
| <i>Brassica cretica</i> | KAF3530441.1 | RLK | LRR       |
| <i>Brassica cretica</i> | KAF3530536.1 | RLK | Other-RLK |
| <i>Brassica cretica</i> | KAF3530598.1 | RLK | Other-RLK |
| <i>Brassica cretica</i> | KAF3530599.1 | RLK | Other-RLK |
| <i>Brassica cretica</i> | KAF3530670.1 | RLK | LRR       |
| <i>Brassica cretica</i> | KAF3530718.1 | RLK | Other-RLK |
| <i>Brassica cretica</i> | KAF3530720.1 | RLK | Other-RLK |
| <i>Brassica cretica</i> | KAF3531120.1 | RLK | LRR       |
| <i>Brassica cretica</i> | KAF3531197.1 | RLK | Other-RLK |
| <i>Brassica cretica</i> | KAF3531306.1 | RLK | LRR       |
| <i>Brassica cretica</i> | KAF3531321.1 | RLK | LRR       |
| <i>Brassica cretica</i> | KAF3531340.1 | RLK | LRR       |
| <i>Brassica cretica</i> | KAF3531393.1 | RLK | Other-RLK |
| <i>Brassica cretica</i> | KAF3531394.1 | RLK | Other-RLK |
| <i>Brassica cretica</i> | KAF3531405.1 | RLK | Other-RLK |
| <i>Brassica cretica</i> | KAF3531409.1 | RLK | Other-RLK |
| <i>Brassica cretica</i> | KAF3531506.1 | RLK | Other-RLK |
| <i>Brassica cretica</i> | KAF3531590.1 | RLK | LRR       |
| <i>Brassica cretica</i> | KAF3531635.1 | RLK | LRR       |
| <i>Brassica cretica</i> | KAF3531701.1 | RLK | Other-RLK |
| <i>Brassica cretica</i> | KAF3531702.1 | RLK | Other-RLK |
| <i>Brassica cretica</i> | KAF3531769.1 | RLK | LRR       |
| <i>Brassica cretica</i> | KAF3532193.1 | RLK | Other-RLK |

|                         |              |     |           |
|-------------------------|--------------|-----|-----------|
| <i>Brassica cretica</i> | KAF3532197.1 | RLK | Other-RLK |
| <i>Brassica cretica</i> | KAF3532250.1 | RLK | Other-RLK |
| <i>Brassica cretica</i> | KAF3532566.1 | RLK | Other-RLK |
| <i>Brassica cretica</i> | KAF3532682.1 | RLK | LRR       |
| <i>Brassica cretica</i> | KAF3532727.1 | RLK | Other-RLK |
| <i>Brassica cretica</i> | KAF3532813.1 | RLK | LRR       |
| <i>Brassica cretica</i> | KAF3533106.1 | RLK | LRR       |
| <i>Brassica cretica</i> | KAF3533454.1 | RLK | Other-RLK |
| <i>Brassica cretica</i> | KAF3533455.1 | RLK | Other-RLK |
| <i>Brassica cretica</i> | KAF3533742.1 | RLK | LRR       |
| <i>Brassica cretica</i> | KAF3533744.1 | RLK | Other-RLK |
| <i>Brassica cretica</i> | KAF3534109.1 | RLK | Other-RLK |
| <i>Brassica cretica</i> | KAF3534120.1 | RLK | Other-RLK |
| <i>Brassica cretica</i> | KAF3534161.1 | RLK | Other-RLK |
| <i>Brassica cretica</i> | KAF3534207.1 | RLK | LRR       |
| <i>Brassica cretica</i> | KAF3534208.1 | RLK | LRR       |
| <i>Brassica cretica</i> | KAF3534255.1 | RLK | Other-RLK |
| <i>Brassica cretica</i> | KAF3534307.1 | RLK | Other-RLK |
| <i>Brassica cretica</i> | KAF3534397.1 | RLK | LRR       |
| <i>Brassica cretica</i> | KAF3534726.1 | RLK | Other-RLK |
| <i>Brassica cretica</i> | KAF3534760.1 | RLK | LRR       |
| <i>Brassica cretica</i> | KAF3534780.1 | RLK | Other-RLK |
| <i>Brassica cretica</i> | KAF3534896.1 | RLK | Other-RLK |
| <i>Brassica cretica</i> | KAF3534991.1 | RLK | LRR       |
| <i>Brassica cretica</i> | KAF3542231.1 | RLK | Other-RLK |
| <i>Brassica cretica</i> | KAF3542552.1 | RLK | Other-RLK |
| <i>Brassica cretica</i> | KAF3542635.1 | RLK | Other-RLK |
| <i>Brassica cretica</i> | KAF3542856.1 | RLK | LRR       |
| <i>Brassica cretica</i> | KAF3542884.1 | RLK | Other-RLK |
| <i>Brassica cretica</i> | KAF3543004.1 | RLK | Other-RLK |
| <i>Brassica cretica</i> | KAF3543304.1 | RLK | Other-RLK |
| <i>Brassica cretica</i> | KAF3543395.1 | RLK | LRR       |
| <i>Brassica cretica</i> | KAF3543401.1 | RLK | LRR       |
| <i>Brassica cretica</i> | KAF3543503.1 | RLK | Other-RLK |
| <i>Brassica cretica</i> | KAF3543538.1 | RLK | Other-RLK |
| <i>Brassica cretica</i> | KAF3543659.1 | RLK | Other-RLK |
| <i>Brassica cretica</i> | KAF3543661.1 | RLK | Other-RLK |
| <i>Brassica cretica</i> | KAF3543819.1 | RLK | Other-RLK |
| <i>Brassica cretica</i> | KAF3544014.1 | RLK | Other-RLK |
| <i>Brassica cretica</i> | KAF3544176.1 | RLK | LRR       |
| <i>Brassica cretica</i> | KAF3544326.1 | RLK | LRR       |
| <i>Brassica cretica</i> | KAF3544482.1 | RLK | Other-RLK |
| <i>Brassica cretica</i> | KAF3544600.1 | RLK | LRR       |
| <i>Brassica cretica</i> | KAF3544714.1 | RLK | Other-RLK |
| <i>Brassica cretica</i> | KAF3544726.1 | RLK | Other-RLK |
| <i>Brassica cretica</i> | KAF3544740.1 | RLK | Other-RLK |
| <i>Brassica cretica</i> | KAF3544901.1 | RLK | Other-RLK |
| <i>Brassica cretica</i> | KAF3544905.1 | RLK | Other-RLK |
| <i>Brassica cretica</i> | KAF3544906.1 | RLK | Other-RLK |
| <i>Brassica cretica</i> | KAF3544907.1 | RLK | Other-RLK |
| <i>Brassica cretica</i> | KAF3545061.1 | RLK | Other-RLK |
| <i>Brassica cretica</i> | KAF3545258.1 | RLK | Other-RLK |
| <i>Brassica cretica</i> | KAF3545319.1 | RLK | Other-RLK |
| <i>Brassica cretica</i> | KAF3545417.1 | RLK | LRR       |
| <i>Brassica cretica</i> | KAF3545426.1 | RLK | Other-RLK |
| <i>Brassica cretica</i> | KAF3545513.1 | RLK | Other-RLK |
| <i>Brassica cretica</i> | KAF3545599.1 | RLK | LRR       |
| <i>Brassica cretica</i> | KAF3545637.1 | RLK | Other-RLK |
| <i>Brassica cretica</i> | KAF3545713.1 | RLK | Other-RLK |
| <i>Brassica cretica</i> | KAF3545767.1 | RLK | LRR       |
| <i>Brassica cretica</i> | KAF3545858.1 | RLK | Other-RLK |
| <i>Brassica cretica</i> | KAF3545892.1 | RLK | LRR       |

|                         |              |     |           |
|-------------------------|--------------|-----|-----------|
| <i>Brassica cretica</i> | KAF3546006.1 | RLK | LRR       |
| <i>Brassica cretica</i> | KAF3546043.1 | RLK | LRR       |
| <i>Brassica cretica</i> | KAF3546077.1 | RLK | Other-RLK |
| <i>Brassica cretica</i> | KAF3546166.1 | RLK | Other-RLK |
| <i>Brassica cretica</i> | KAF3546222.1 | RLK | Other-RLK |
| <i>Brassica cretica</i> | KAF3546267.1 | RLK | Other-RLK |
| <i>Brassica cretica</i> | KAF3546433.1 | RLK | LRR       |
| <i>Brassica cretica</i> | KAF3546640.1 | RLK | Other-RLK |
| <i>Brassica cretica</i> | KAF3546646.1 | RLK | Other-RLK |
| <i>Brassica cretica</i> | KAF3546697.1 | RLK | Other-RLK |
| <i>Brassica cretica</i> | KAF3546747.1 | RLK | Other-RLK |
| <i>Brassica cretica</i> | KAF3546825.1 | RLK | LRR       |
| <i>Brassica cretica</i> | KAF3546836.1 | RLK | LRR       |
| <i>Brassica cretica</i> | KAF3546841.1 | RLK | LRR       |
| <i>Brassica cretica</i> | KAF3546970.1 | RLK | Other-RLK |
| <i>Brassica cretica</i> | KAF3547175.1 | RLK | Other-RLK |
| <i>Brassica cretica</i> | KAF3547271.1 | RLK | Other-RLK |
| <i>Brassica cretica</i> | KAF3547440.1 | RLK | LRR       |
| <i>Brassica cretica</i> | KAF3547513.1 | RLK | Other-RLK |
| <i>Brassica cretica</i> | KAF3547525.1 | RLK | LRR       |
| <i>Brassica cretica</i> | KAF3547528.1 | RLK | Other-RLK |
| <i>Brassica cretica</i> | KAF3547618.1 | RLK | Other-RLK |
| <i>Brassica cretica</i> | KAF3547657.1 | RLK | Other-RLK |
| <i>Brassica cretica</i> | KAF3547660.1 | RLK | Other-RLK |
| <i>Brassica cretica</i> | KAF3547678.1 | RLK | Other-RLK |
| <i>Brassica cretica</i> | KAF3547685.1 | RLK | LRR       |
| <i>Brassica cretica</i> | KAF3547842.1 | RLK | Other-RLK |
| <i>Brassica cretica</i> | KAF3547917.1 | RLK | LRR       |
| <i>Brassica cretica</i> | KAF3548122.1 | RLK | Other-RLK |
| <i>Brassica cretica</i> | KAF3548255.1 | RLK | Other-RLK |
| <i>Brassica cretica</i> | KAF3548407.1 | RLK | Other-RLK |
| <i>Brassica cretica</i> | KAF3548579.1 | RLK | Other-RLK |
| <i>Brassica cretica</i> | KAF3548747.1 | RLK | LRR       |
| <i>Brassica cretica</i> | KAF3548895.1 | RLK | Other-RLK |
| <i>Brassica cretica</i> | KAF3548896.1 | RLK | Other-RLK |
| <i>Brassica cretica</i> | KAF3549092.1 | RLK | Other-RLK |
| <i>Brassica cretica</i> | KAF3549183.1 | RLK | Other-RLK |
| <i>Brassica cretica</i> | KAF3549227.1 | RLK | Other-RLK |
| <i>Brassica cretica</i> | KAF3549228.1 | RLK | Other-RLK |
| <i>Brassica cretica</i> | KAF3549230.1 | RLK | Other-RLK |
| <i>Brassica cretica</i> | KAF3549445.1 | RLK | Other-RLK |
| <i>Brassica cretica</i> | KAF3549501.1 | RLK | Other-RLK |
| <i>Brassica cretica</i> | KAF3549517.1 | RLK | Other-RLK |
| <i>Brassica cretica</i> | KAF3549718.1 | RLK | LRR       |
| <i>Brassica cretica</i> | KAF3549720.1 | RLK | LRR       |
| <i>Brassica cretica</i> | KAF3549721.1 | RLK | LRR       |
| <i>Brassica cretica</i> | KAF3549823.1 | RLK | Other-RLK |
| <i>Brassica cretica</i> | KAF3549886.1 | RLK | LRR       |
| <i>Brassica cretica</i> | KAF3550204.1 | RLK | Other-RLK |
| <i>Brassica cretica</i> | KAF3550205.1 | RLK | Other-RLK |
| <i>Brassica cretica</i> | KAF3550207.1 | RLK | Other-RLK |
| <i>Brassica cretica</i> | KAF3550237.1 | RLK | Other-RLK |
| <i>Brassica cretica</i> | KAF3550258.1 | RLK | LRR       |
| <i>Brassica cretica</i> | KAF3550268.1 | RLK | Other-RLK |
| <i>Brassica cretica</i> | KAF3550289.1 | RLK | Other-RLK |
| <i>Brassica cretica</i> | KAF3550535.1 | RLK | LRR       |
| <i>Brassica cretica</i> | KAF3550654.1 | RLK | LRR       |
| <i>Brassica cretica</i> | KAF3550746.1 | RLK | Other-RLK |
| <i>Brassica cretica</i> | KAF3550987.1 | RLK | LRR       |
| <i>Brassica cretica</i> | KAF3551134.1 | RLK | LRR       |
| <i>Brassica cretica</i> | KAF3551208.1 | RLK | LRR       |
| <i>Brassica cretica</i> | KAF3551215.1 | RLK | LRR       |

|                         |              |     |           |
|-------------------------|--------------|-----|-----------|
| <i>Brassica cretica</i> | KAF3551216.1 | RLK | LRR       |
| <i>Brassica cretica</i> | KAF3551520.1 | RLK | LRR       |
| <i>Brassica cretica</i> | KAF3551801.1 | RLK | LRR       |
| <i>Brassica cretica</i> | KAF3551804.1 | RLK | LRR       |
| <i>Brassica cretica</i> | KAF3551806.1 | RLK | LRR       |
| <i>Brassica cretica</i> | KAF3552088.1 | RLK | LRR       |
| <i>Brassica cretica</i> | KAF3552125.1 | RLK | LRR       |
| <i>Brassica cretica</i> | KAF3552152.1 | RLK | LRR       |
| <i>Brassica cretica</i> | KAF3552369.1 | RLK | LRR       |
| <i>Brassica cretica</i> | KAF3552472.1 | RLK | Other-RLK |
| <i>Brassica cretica</i> | KAF3560512.1 | RLK | Other-RLK |
| <i>Brassica cretica</i> | KAF3560562.1 | RLK | LRR       |
| <i>Brassica cretica</i> | KAF3560572.1 | RLK | Other-RLK |
| <i>Brassica cretica</i> | KAF3560574.1 | RLK | Other-RLK |
| <i>Brassica cretica</i> | KAF3560652.1 | RLK | Other-RLK |
| <i>Brassica cretica</i> | KAF3560654.1 | RLK | Other-RLK |
| <i>Brassica cretica</i> | KAF3561033.1 | RLK | Other-RLK |
| <i>Brassica cretica</i> | KAF3561064.1 | RLK | LRR       |
| <i>Brassica cretica</i> | KAF3561149.1 | RLK | Other-RLK |
| <i>Brassica cretica</i> | KAF3561395.1 | RLK | Other-RLK |
| <i>Brassica cretica</i> | KAF3561444.1 | RLK | Other-RLK |
| <i>Brassica cretica</i> | KAF3561469.1 | RLK | Other-RLK |
| <i>Brassica cretica</i> | KAF3561519.1 | RLK | Other-RLK |
| <i>Brassica cretica</i> | KAF3561557.1 | RLK | Other-RLK |
| <i>Brassica cretica</i> | KAF3561578.1 | RLK | LRR       |
| <i>Brassica cretica</i> | KAF3561775.1 | RLK | LRR       |
| <i>Brassica cretica</i> | KAF3562030.1 | RLK | Other-RLK |
| <i>Brassica cretica</i> | KAF3562133.1 | RLK | LRR       |
| <i>Brassica cretica</i> | KAF3562170.1 | RLK | Other-RLK |
| <i>Brassica cretica</i> | KAF3562210.1 | RLK | Other-RLK |
| <i>Brassica cretica</i> | KAF3562340.1 | RLK | Other-RLK |
| <i>Brassica cretica</i> | KAF3562511.1 | RLK | Other-RLK |
| <i>Brassica cretica</i> | KAF3562548.1 | RLK | Other-RLK |
| <i>Brassica cretica</i> | KAF3562760.1 | RLK | Other-RLK |
| <i>Brassica cretica</i> | KAF3562943.1 | RLK | LRR       |
| <i>Brassica cretica</i> | KAF3563235.1 | RLK | Other-RLK |
| <i>Brassica cretica</i> | KAF3563391.1 | RLK | LRR       |
| <i>Brassica cretica</i> | KAF3563497.1 | RLK | LRR       |
| <i>Brassica cretica</i> | KAF3563499.1 | RLK | Other-RLK |
| <i>Brassica cretica</i> | KAF3563679.1 | RLK | Other-RLK |
| <i>Brassica cretica</i> | KAF3563680.1 | RLK | Other-RLK |
| <i>Brassica cretica</i> | KAF3563681.1 | RLK | Other-RLK |
| <i>Brassica cretica</i> | KAF3563715.1 | RLK | LRR       |
| <i>Brassica cretica</i> | KAF3563725.1 | RLK | Other-RLK |
| <i>Brassica cretica</i> | KAF3563845.1 | RLK | Other-RLK |
| <i>Brassica cretica</i> | KAF3564141.1 | RLK | LRR       |
| <i>Brassica cretica</i> | KAF3564399.1 | RLK | LRR       |
| <i>Brassica cretica</i> | KAF3564458.1 | RLK | Other-RLK |
| <i>Brassica cretica</i> | KAF3564635.1 | RLK | LRR       |
| <i>Brassica cretica</i> | KAF3564661.1 | RLK | Other-RLK |
| <i>Brassica cretica</i> | KAF3564872.1 | RLK | LRR       |
| <i>Brassica cretica</i> | KAF3564878.1 | RLK | LRR       |
| <i>Brassica cretica</i> | KAF3565048.1 | RLK | Other-RLK |
| <i>Brassica cretica</i> | KAF3565049.1 | RLK | LRR       |
| <i>Brassica cretica</i> | KAF3565055.1 | RLK | Other-RLK |
| <i>Brassica cretica</i> | KAF3565146.1 | RLK | LRR       |
| <i>Brassica cretica</i> | KAF3565177.1 | RLK | Other-RLK |
| <i>Brassica cretica</i> | KAF3565181.1 | RLK | Other-RLK |
| <i>Brassica cretica</i> | KAF3565184.1 | RLK | Other-RLK |
| <i>Brassica cretica</i> | KAF3565185.1 | RLK | Other-RLK |
| <i>Brassica cretica</i> | KAF3565405.1 | RLK | Other-RLK |
| <i>Brassica cretica</i> | KAF3565410.1 | RLK | Other-RLK |

|                         |              |     |           |
|-------------------------|--------------|-----|-----------|
| <i>Brassica cretica</i> | KAF3565537.1 | RLK | Other-RLK |
| <i>Brassica cretica</i> | KAF3565641.1 | RLK | Other-RLK |
| <i>Brassica cretica</i> | KAF3565656.1 | RLK | Other-RLK |
| <i>Brassica cretica</i> | KAF3565805.1 | RLK | Other-RLK |
| <i>Brassica cretica</i> | KAF3566013.1 | RLK | Other-RLK |
| <i>Brassica cretica</i> | KAF3566190.1 | RLK | LRR       |
| <i>Brassica cretica</i> | KAF3566206.1 | RLK | Other-RLK |
| <i>Brassica cretica</i> | KAF3566357.1 | RLK | Other-RLK |
| <i>Brassica cretica</i> | KAF3566359.1 | RLK | Other-RLK |
| <i>Brassica cretica</i> | KAF3566407.1 | RLK | LRR       |
| <i>Brassica cretica</i> | KAF3566420.1 | RLK | LRR       |
| <i>Brassica cretica</i> | KAF3566664.1 | RLK | Other-RLK |
| <i>Brassica cretica</i> | KAF3566685.1 | RLK | Other-RLK |
| <i>Brassica cretica</i> | KAF3566800.1 | RLK | Other-RLK |
| <i>Brassica cretica</i> | KAF3566982.1 | RLK | Other-RLK |
| <i>Brassica cretica</i> | KAF3567039.1 | RLK | LRR       |
| <i>Brassica cretica</i> | KAF3567156.1 | RLK | Other-RLK |
| <i>Brassica cretica</i> | KAF3567231.1 | RLK | Other-RLK |
| <i>Brassica cretica</i> | KAF3567250.1 | RLK | LRR       |
| <i>Brassica cretica</i> | KAF3567301.1 | RLK | Other-RLK |
| <i>Brassica cretica</i> | KAF3567358.1 | RLK | Other-RLK |
| <i>Brassica cretica</i> | KAF3567385.1 | RLK | LRR       |
| <i>Brassica cretica</i> | KAF3567444.1 | RLK | LRR       |
| <i>Brassica cretica</i> | KAF3567467.1 | RLK | Other-RLK |
| <i>Brassica cretica</i> | KAF3567647.1 | RLK | LRR       |
| <i>Brassica cretica</i> | KAF3567648.1 | RLK | LRR       |
| <i>Brassica cretica</i> | KAF3567894.1 | RLK | Other-RLK |
| <i>Brassica cretica</i> | KAF3568114.1 | RLK | LRR       |
| <i>Brassica cretica</i> | KAF3568267.1 | RLK | LRR       |
| <i>Brassica cretica</i> | KAF3568523.1 | RLK | Other-RLK |
| <i>Brassica cretica</i> | KAF3568533.1 | RLK | Other-RLK |
| <i>Brassica cretica</i> | KAF3568610.1 | RLK | Other-RLK |
| <i>Brassica cretica</i> | KAF3568699.1 | RLK | Other-RLK |
| <i>Brassica cretica</i> | KAF3568938.1 | RLK | LRR       |
| <i>Brassica cretica</i> | KAF3569083.1 | RLK | LRR       |
| <i>Brassica cretica</i> | KAF3569266.1 | RLK | Other-RLK |
| <i>Brassica cretica</i> | KAF3569306.1 | RLK | Other-RLK |
| <i>Brassica cretica</i> | KAF3569373.1 | RLK | LRR       |
| <i>Brassica cretica</i> | KAF3569515.1 | RLK | Other-RLK |
| <i>Brassica cretica</i> | KAF3575639.1 | RLK | Other-RLK |
| <i>Brassica cretica</i> | KAF3575689.1 | RLK | Other-RLK |
| <i>Brassica cretica</i> | KAF3575692.1 | RLK | Other-RLK |
| <i>Brassica cretica</i> | KAF3575772.1 | RLK | Other-RLK |
| <i>Brassica cretica</i> | KAF3575849.1 | RLK | LRR       |
| <i>Brassica cretica</i> | KAF3576064.1 | RLK | LRR       |
| <i>Brassica cretica</i> | KAF3576067.1 | RLK | LRR       |
| <i>Brassica cretica</i> | KAF3576292.1 | RLK | LRR       |
| <i>Brassica cretica</i> | KAF3576511.1 | RLK | Other-RLK |
| <i>Brassica cretica</i> | KAF3576630.1 | RLK | Other-RLK |
| <i>Brassica cretica</i> | KAF3576748.1 | RLK | Other-RLK |
| <i>Brassica cretica</i> | KAF3576827.1 | RLK | Other-RLK |
| <i>Brassica cretica</i> | KAF3577217.1 | RLK | Other-RLK |
| <i>Brassica cretica</i> | KAF3577276.1 | RLK | LRR       |
| <i>Brassica cretica</i> | KAF3577283.1 | RLK | Other-RLK |
| <i>Brassica cretica</i> | KAF3577290.1 | RLK | Other-RLK |
| <i>Brassica cretica</i> | KAF3577550.1 | RLK | Other-RLK |
| <i>Brassica cretica</i> | KAF3577558.1 | RLK | Lysm      |
| <i>Brassica cretica</i> | KAF3577740.1 | RLK | Other-RLK |
| <i>Brassica cretica</i> | KAF3577991.1 | RLK | LRR       |
| <i>Brassica cretica</i> | KAF3578012.1 | RLK | Other-RLK |
| <i>Brassica cretica</i> | KAF3578022.1 | RLK | Other-RLK |
| <i>Brassica cretica</i> | KAF3578117.1 | RLK | Other-RLK |

|                         |              |     |           |
|-------------------------|--------------|-----|-----------|
| <i>Brassica cretica</i> | KAF3578206.1 | RLK | Other-RLK |
| <i>Brassica cretica</i> | KAF3578558.1 | RLK | Other-RLK |
| <i>Brassica cretica</i> | KAF3578564.1 | RLK | Other-RLK |
| <i>Brassica cretica</i> | KAF3578575.1 | RLK | LRR       |
| <i>Brassica cretica</i> | KAF3578797.1 | RLK | Other-RLK |
| <i>Brassica cretica</i> | KAF3578898.1 | RLK | Other-RLK |
| <i>Brassica cretica</i> | KAF3578905.1 | RLK | LRR       |
| <i>Brassica cretica</i> | KAF3578912.1 | RLK | LRR       |
| <i>Brassica cretica</i> | KAF3579069.1 | RLK | LRR       |
| <i>Brassica cretica</i> | KAF3579186.1 | RLK | Other-RLK |
| <i>Brassica cretica</i> | KAF3579196.1 | RLK | LRR       |
| <i>Brassica cretica</i> | KAF3579334.1 | RLK | Other-RLK |
| <i>Brassica cretica</i> | KAF3579457.1 | RLK | LRR       |
| <i>Brassica cretica</i> | KAF3579469.1 | RLK | Other-RLK |
| <i>Brassica cretica</i> | KAF3579504.1 | RLK | Other-RLK |
| <i>Brassica cretica</i> | KAF3579525.1 | RLK | LRR       |
| <i>Brassica cretica</i> | KAF3579608.1 | RLK | Other-RLK |
| <i>Brassica cretica</i> | KAF3579734.1 | RLK | Other-RLK |
| <i>Brassica cretica</i> | KAF3579800.1 | RLK | Other-RLK |
| <i>Brassica cretica</i> | KAF3579851.1 | RLK | LRR       |
| <i>Brassica cretica</i> | KAF3579852.1 | RLK | Other-RLK |
| <i>Brassica cretica</i> | KAF3579889.1 | RLK | Other-RLK |
| <i>Brassica cretica</i> | KAF3579909.1 | RLK | Other-RLK |
| <i>Brassica cretica</i> | KAF3580065.1 | RLK | Other-RLK |
| <i>Brassica cretica</i> | KAF3580282.1 | RLK | Other-RLK |
| <i>Brassica cretica</i> | KAF3580383.1 | RLK | LRR       |
| <i>Brassica cretica</i> | KAF3580466.1 | RLK | Other-RLK |
| <i>Brassica cretica</i> | KAF3580522.1 | RLK | LRR       |
| <i>Brassica cretica</i> | KAF3580643.1 | RLK | LRR       |
| <i>Brassica cretica</i> | KAF3580951.1 | RLK | LRR       |
| <i>Brassica cretica</i> | KAF3581175.1 | RLK | Other-RLK |
| <i>Brassica cretica</i> | KAF3581323.1 | RLK | Other-RLK |
| <i>Brassica cretica</i> | KAF3581377.1 | RLK | LRR       |
| <i>Brassica cretica</i> | KAF3581405.1 | RLK | Other-RLK |
| <i>Brassica cretica</i> | KAF3581439.1 | RLK | Other-RLK |
| <i>Brassica cretica</i> | KAF3581517.1 | RLK | LRR       |
| <i>Brassica cretica</i> | KAF3581547.1 | RLK | Other-RLK |
| <i>Brassica cretica</i> | KAF3581568.1 | RLK | LRR       |
| <i>Brassica cretica</i> | KAF3581707.1 | RLK | Other-RLK |
| <i>Brassica cretica</i> | KAF3581847.1 | RLK | LRR       |
| <i>Brassica cretica</i> | KAF3581968.1 | RLK | Other-RLK |
| <i>Brassica cretica</i> | KAF3582157.1 | RLK | LRR       |
| <i>Brassica cretica</i> | KAF3582274.1 | RLK | Other-RLK |
| <i>Brassica cretica</i> | KAF3582602.1 | RLK | Other-RLK |
| <i>Brassica cretica</i> | KAF3582635.1 | RLK | Other-RLK |
| <i>Brassica cretica</i> | KAF3582684.1 | RLK | Other-RLK |
| <i>Brassica cretica</i> | KAF3582773.1 | RLK | Other-RLK |
| <i>Brassica cretica</i> | KAF3582824.1 | RLK | Other-RLK |
| <i>Brassica cretica</i> | KAF3582977.1 | RLK | Other-RLK |
| <i>Brassica cretica</i> | KAF3583049.1 | RLK | LRR       |
| <i>Brassica cretica</i> | KAF3590220.1 | RLK | Other-RLK |
| <i>Brassica cretica</i> | KAF3590225.1 | RLK | LRR       |
| <i>Brassica cretica</i> | KAF3590229.1 | RLK | LRR       |
| <i>Brassica cretica</i> | KAF3590590.1 | RLK | Other-RLK |
| <i>Brassica cretica</i> | KAF3590620.1 | RLK | Other-RLK |
| <i>Brassica cretica</i> | KAF3590644.1 | RLK | Other-RLK |
| <i>Brassica cretica</i> | KAF3590807.1 | RLK | Other-RLK |
| <i>Brassica cretica</i> | KAF3591051.1 | RLK | Other-RLK |
| <i>Brassica cretica</i> | KAF3591219.1 | RLK | LRR       |
| <i>Brassica cretica</i> | KAF3591238.1 | RLK | LRR       |
| <i>Brassica cretica</i> | KAF3591262.1 | RLK | LRR       |
| <i>Brassica cretica</i> | KAF3591292.1 | RLK | LRR       |



|                         |              |     |           |
|-------------------------|--------------|-----|-----------|
| <i>Brassica cretica</i> | KAF3591324.1 | RLK | Other-RLK |
| <i>Brassica cretica</i> | KAF3591325.1 | RLK | Other-RLK |
| <i>Brassica cretica</i> | KAF3591329.1 | RLK | LRR       |
| <i>Brassica cretica</i> | KAF3591550.1 | RLK | Other-RLK |
| <i>Brassica cretica</i> | KAF3591613.1 | RLK | Other-RLK |
| <i>Brassica cretica</i> | KAF3591810.1 | RLK | Other-RLK |
| <i>Brassica cretica</i> | KAF3591952.1 | RLK | Other-RLK |
| <i>Brassica cretica</i> | KAF3591956.1 | RLK | Other-RLK |
| <i>Brassica cretica</i> | KAF3591957.1 | RLK | Other-RLK |
| <i>Brassica cretica</i> | KAF3591958.1 | RLK | Other-RLK |
| <i>Brassica cretica</i> | KAF3591959.1 | RLK | Other-RLK |
| <i>Brassica cretica</i> | KAF3591961.1 | RLK | LRR       |
| <i>Brassica cretica</i> | KAF3591997.1 | RLK | LRR       |
| <i>Brassica cretica</i> | KAF3592238.1 | RLK | Other-RLK |
| <i>Brassica cretica</i> | KAF3592381.1 | RLK | LRR       |
| <i>Brassica cretica</i> | KAF3592477.1 | RLK | Other-RLK |
| <i>Brassica cretica</i> | KAF3592750.1 | RLK | Other-RLK |
| <i>Brassica cretica</i> | KAF3593012.1 | RLK | LRR       |
| <i>Brassica cretica</i> | KAF3593070.1 | RLK | Other-RLK |
| <i>Brassica cretica</i> | KAF3593223.1 | RLK | Other-RLK |
| <i>Brassica cretica</i> | KAF3593432.1 | RLK | Other-RLK |
| <i>Brassica cretica</i> | KAF3593658.1 | RLK | Other-RLK |
| <i>Brassica cretica</i> | KAF3593750.1 | RLK | Other-RLK |
| <i>Brassica cretica</i> | KAF3593886.1 | RLK | LRR       |
| <i>Brassica cretica</i> | KAF3594039.1 | RLK | Other-RLK |
| <i>Brassica cretica</i> | KAF3594063.1 | RLK | LRR       |
| <i>Brassica cretica</i> | KAF3594068.1 | RLK | LRR       |
| <i>Brassica cretica</i> | KAF3594134.1 | RLK | LRR       |
| <i>Brassica cretica</i> | KAF3594145.1 | RLK | LRR       |
| <i>Brassica cretica</i> | KAF3594381.1 | RLK | Other-RLK |
| <i>Brassica cretica</i> | KAF3594382.1 | RLK | LRR       |
| <i>Brassica cretica</i> | KAF3594541.1 | RLK | Other-RLK |
| <i>Brassica cretica</i> | KAF3594672.1 | RLK | Other-RLK |
| <i>Brassica cretica</i> | KAF3594681.1 | RLK | LRR       |
| <i>Brassica cretica</i> | KAF3594687.1 | RLK | LRR       |
| <i>Brassica cretica</i> | KAF3594897.1 | RLK | LRR       |
| <i>Brassica cretica</i> | KAF3594900.1 | RLK | Other-RLK |
| <i>Brassica cretica</i> | KAF3594942.1 | RLK | LRR       |
| <i>Brassica cretica</i> | KAF3594973.1 | RLK | Other-RLK |
| <i>Brassica cretica</i> | KAF3594980.1 | RLK | Other-RLK |
| <i>Brassica cretica</i> | KAF3595027.1 | RLK | LRR       |
| <i>Brassica cretica</i> | KAF3595050.1 | RLK | Other-RLK |
| <i>Brassica cretica</i> | KAF3595485.1 | RLK | LRR       |
| <i>Brassica cretica</i> | KAF3595551.1 | RLK | Other-RLK |
| <i>Brassica cretica</i> | KAF3595681.1 | RLK | LRR       |
| <i>Brassica cretica</i> | KAF3595709.1 | RLK | LRR       |
| <i>Brassica cretica</i> | KAF3595813.1 | RLK | LRR       |
| <i>Brassica cretica</i> | KAF3595854.1 | RLK | Other-RLK |
| <i>Brassica cretica</i> | KAF3595859.1 | RLK | Other-RLK |
| <i>Brassica cretica</i> | KAF3595966.1 | RLK | LRR       |
| <i>Brassica cretica</i> | KAF3596107.1 | RLK | LRR       |
| <i>Brassica cretica</i> | KAF3596246.1 | RLK | Other-RLK |
| <i>Brassica cretica</i> | KAF3596346.1 | RLK | LRR       |
| <i>Brassica cretica</i> | KAF3596398.1 | RLK | LRR       |
| <i>Brassica cretica</i> | KAF3596599.1 | RLK | Other-RLK |
| <i>Brassica cretica</i> | KAF3596614.1 | RLK | Other-RLK |
| <i>Brassica cretica</i> | KAF3596617.1 | RLK | Other-RLK |
| <i>Brassica cretica</i> | KAF3596659.1 | RLK | Other-RLK |
| <i>Brassica cretica</i> | KAF3596668.1 | RLK | Other-RLK |
| <i>Brassica cretica</i> | KAF3596767.1 | RLK | LRR       |
| <i>Brassica cretica</i> | KAF3596777.1 | RLK | Other-RLK |
| <i>Brassica cretica</i> | KAF3596797.1 | RLK | LRR       |

|                         |              |     |           |
|-------------------------|--------------|-----|-----------|
| <i>Brassica cretica</i> | KAF3596816.1 | RLK | Other-RLK |
| <i>Brassica cretica</i> | KAF3596851.1 | RLK | Other-RLK |
| <i>Brassica cretica</i> | KAF3597060.1 | RLK | LRR       |
| <i>Brassica cretica</i> | KAF3597102.1 | RLK | LRR       |
| <i>Brassica cretica</i> | KAF3597152.1 | RLK | LRR       |
| <i>Brassica cretica</i> | KAF3597652.1 | RLK | Other-RLK |
| <i>Brassica cretica</i> | KAF3597752.1 | RLK | LRR       |
| <i>Brassica cretica</i> | KAF3597836.1 | RLK | Other-RLK |
| <i>Brassica cretica</i> | KAF3597898.1 | RLK | LRR       |
| <i>Brassica cretica</i> | KAF3598012.1 | RLK | LRR       |
| <i>Brassica cretica</i> | KAF3598086.1 | RLK | Other-RLK |
| <i>Brassica cretica</i> | KAF3598156.1 | RLK | LRR       |
| <i>Brassica cretica</i> | KAF3604826.1 | RLK | Other-RLK |
| <i>Brassica cretica</i> | KAF3604840.1 | RLK | Other-RLK |
| <i>Brassica cretica</i> | KAF3604915.1 | RLK | Other-RLK |
| <i>Brassica cretica</i> | KAF3605237.1 | RLK | LRR       |
| <i>Brassica cretica</i> | KAF3605528.1 | RLK | Other-RLK |
| <i>Brassica cretica</i> | KAF3605539.1 | RLK | Other-RLK |
| <i>Brassica cretica</i> | KAF3605730.1 | RLK | Other-RLK |
| <i>Brassica cretica</i> | KAF3605757.1 | RLK | LRR       |
| <i>Brassica cretica</i> | KAF3605812.1 | RLK | Other-RLK |
| <i>Brassica cretica</i> | KAF3605881.1 | RLK | Other-RLK |
| <i>Brassica cretica</i> | KAF3605888.1 | RLK | LRR       |
| <i>Brassica cretica</i> | KAF3605995.1 | RLK | LRR       |
| <i>Brassica cretica</i> | KAF3606163.1 | RLK | Other-RLK |
| <i>Brassica cretica</i> | KAF3606164.1 | RLK | Other-RLK |
| <i>Brassica cretica</i> | KAF3606261.1 | RLK | LRR       |
| <i>Brassica cretica</i> | KAF3606329.1 | RLK | Other-RLK |
| <i>Brassica cretica</i> | KAF3606718.1 | RLK | LRR       |
| <i>Brassica cretica</i> | KAF3606752.1 | RLK | Other-RLK |
| <i>Brassica cretica</i> | KAF3606881.1 | RLK | LRR       |
| <i>Brassica cretica</i> | KAF3606939.1 | RLK | Other-RLK |
| <i>Brassica cretica</i> | KAF3607186.1 | RLK | LRR       |
| <i>Brassica cretica</i> | KAF3607204.1 | RLK | Other-RLK |
| <i>Brassica cretica</i> | KAF3607292.1 | RLK | Other-RLK |
| <i>Brassica cretica</i> | KAF3607675.1 | RLK | LRR       |
| <i>Brassica cretica</i> | KAF3607908.1 | RLK | LRR       |
| <i>Brassica cretica</i> | KAF3607936.1 | RLK | LRR       |
| <i>Brassica cretica</i> | KAF3608273.1 | RLK | LRR       |
| <i>Brassica cretica</i> | KAF3608474.1 | RLK | LRR       |
| <i>Brassica cretica</i> | KAF3608549.1 | RLK | Other-RLK |
| <i>Brassica cretica</i> | KAF3609052.1 | RLK | LRR       |
| <i>Brassica cretica</i> | KAF3609185.1 | RLK | LRR       |
| <i>Brassica cretica</i> | KAF3609405.1 | RLK | LRR       |
| <i>Brassica cretica</i> | KAF3609485.1 | RLK | LRR       |
| <i>Brassica cretica</i> | KAF3609513.1 | RLK | Other-RLK |
| <i>Brassica cretica</i> | KAF3609522.1 | RLK | Other-RLK |
| <i>Brassica cretica</i> | KAF3609537.1 | RLK | Other-RLK |
| <i>Brassica cretica</i> | KAF3609633.1 | RLK | Other-RLK |
| <i>Brassica cretica</i> | KAF3609786.1 | RLK | Other-RLK |
| <i>Brassica cretica</i> | KAF3609906.1 | RLK | Other-RLK |
| <i>Brassica cretica</i> | KAF3609935.1 | RLK | Other-RLK |
| <i>Brassica cretica</i> | KAF3610095.1 | RLK | Other-RLK |
| <i>Brassica cretica</i> | KAF3610674.1 | RLK | LRR       |
| <i>Brassica cretica</i> | KAF3610783.1 | RLK | Other-RLK |
| <i>Brassica cretica</i> | KAF3610809.1 | RLK | Other-RLK |
| <i>Brassica cretica</i> | KAF3610851.1 | RLK | Lysm      |
| <i>Brassica cretica</i> | KAF3610959.1 | RLK | LRR       |
| <i>Brassica cretica</i> | KAF3611012.1 | RLK | Other-RLK |
| <i>Brassica cretica</i> | KAF3611101.1 | RLK | Other-RLK |
| <i>Brassica cretica</i> | KAF3611546.1 | RLK | LRR       |
| <i>Brassica cretica</i> | KAF3611659.1 | RLK | LRR       |

|                         |              |     |           |
|-------------------------|--------------|-----|-----------|
| <i>Brassica cretica</i> | KAF3611776.1 | RLK | Other-RLK |
| <i>Brassica cretica</i> | KAF3611825.1 | RLK | LRR       |
| <i>Brassica cretica</i> | KAF3611901.1 | RLK | Other-RLK |
| <i>Brassica cretica</i> | KAF3611902.1 | RLK | Other-RLK |
| <i>Brassica cretica</i> | KAF3611970.1 | RLK | Other-RLK |
| <i>Brassica cretica</i> | KAF3611993.1 | RLK | Other-RLK |
| <i>Brassica cretica</i> | KAF3612069.1 | RLK | Other-RLK |
| <i>Brassica cretica</i> | KAF3492795.1 | RLP | LRR       |
| <i>Brassica cretica</i> | KAF3492846.1 | RLP | LRR       |
| <i>Brassica cretica</i> | KAF3493125.1 | RLP | Lysm      |
| <i>Brassica cretica</i> | KAF3495299.1 | RLP | LRR       |
| <i>Brassica cretica</i> | KAF3495711.1 | RLP | LRR       |
| <i>Brassica cretica</i> | KAF3495939.1 | RLP | LRR       |
| <i>Brassica cretica</i> | KAF3496031.1 | RLP | LRR       |
| <i>Brassica cretica</i> | KAF3496187.1 | RLP | LRR       |
| <i>Brassica cretica</i> | KAF3496193.1 | RLP | LRR       |
| <i>Brassica cretica</i> | KAF3496538.1 | RLP | LRR       |
| <i>Brassica cretica</i> | KAF3496742.1 | RLP | LRR       |
| <i>Brassica cretica</i> | KAF3496993.1 | RLP | LRR       |
| <i>Brassica cretica</i> | KAF3497409.1 | RLP | LRR       |
| <i>Brassica cretica</i> | KAF3497625.1 | RLP | LRR       |
| <i>Brassica cretica</i> | KAF3497647.1 | RLP | LRR       |
| <i>Brassica cretica</i> | KAF3497651.1 | RLP | LRR       |
| <i>Brassica cretica</i> | KAF3497769.1 | RLP | LRR       |
| <i>Brassica cretica</i> | KAF3497809.1 | RLP | LRR       |
| <i>Brassica cretica</i> | KAF3498935.1 | RLP | LRR       |
| <i>Brassica cretica</i> | KAF3515489.1 | RLP | LRR       |
| <i>Brassica cretica</i> | KAF3515583.1 | RLP | LRR       |
| <i>Brassica cretica</i> | KAF3515587.1 | RLP | LRR       |
| <i>Brassica cretica</i> | KAF3515909.1 | RLP | LRR       |
| <i>Brassica cretica</i> | KAF3516628.1 | RLP | LRR       |
| <i>Brassica cretica</i> | KAF3517247.1 | RLP | LRR       |
| <i>Brassica cretica</i> | KAF3517249.1 | RLP | LRR       |
| <i>Brassica cretica</i> | KAF3517872.1 | RLP | LRR       |
| <i>Brassica cretica</i> | KAF3518061.1 | RLP | LRR       |
| <i>Brassica cretica</i> | KAF3519282.1 | RLP | LRR       |
| <i>Brassica cretica</i> | KAF3519381.1 | RLP | LRR       |
| <i>Brassica cretica</i> | KAF3519475.1 | RLP | LRR       |
| <i>Brassica cretica</i> | KAF3519685.1 | RLP | LRR       |
| <i>Brassica cretica</i> | KAF3520182.1 | RLP | LRR       |
| <i>Brassica cretica</i> | KAF3520760.1 | RLP | LRR       |
| <i>Brassica cretica</i> | KAF3520873.1 | RLP | LRR       |
| <i>Brassica cretica</i> | KAF3521027.1 | RLP | LRR       |
| <i>Brassica cretica</i> | KAF3527819.1 | RLP | LRR       |
| <i>Brassica cretica</i> | KAF3528544.1 | RLP | LRR       |
| <i>Brassica cretica</i> | KAF3528757.1 | RLP | LRR       |
| <i>Brassica cretica</i> | KAF3529312.1 | RLP | LRR       |
| <i>Brassica cretica</i> | KAF3529323.1 | RLP | LRR       |
| <i>Brassica cretica</i> | KAF3529880.1 | RLP | LRR       |
| <i>Brassica cretica</i> | KAF3531136.1 | RLP | LRR       |
| <i>Brassica cretica</i> | KAF3532173.1 | RLP | LRR       |
| <i>Brassica cretica</i> | KAF3532176.1 | RLP | LRR       |
| <i>Brassica cretica</i> | KAF3532638.1 | RLP | LRR       |
| <i>Brassica cretica</i> | KAF3532641.1 | RLP | LRR       |
| <i>Brassica cretica</i> | KAF3532646.1 | RLP | LRR       |
| <i>Brassica cretica</i> | KAF3533009.1 | RLP | LRR       |
| <i>Brassica cretica</i> | KAF3533676.1 | RLP | LRR       |
| <i>Brassica cretica</i> | KAF3542247.1 | RLP | LRR       |
| <i>Brassica cretica</i> | KAF3542341.1 | RLP | LRR       |
| <i>Brassica cretica</i> | KAF3543027.1 | RLP | LRR       |
| <i>Brassica cretica</i> | KAF3543527.1 | RLP | LRR       |
| <i>Brassica cretica</i> | KAF3544388.1 | RLP | LRR       |

|                         |              |     |     |
|-------------------------|--------------|-----|-----|
| <i>Brassica cretica</i> | KAF3544496.1 | RLP | LRR |
| <i>Brassica cretica</i> | KAF3544613.1 | RLP | LRR |
| <i>Brassica cretica</i> | KAF3544789.1 | RLP | LRR |
| <i>Brassica cretica</i> | KAF3545126.1 | RLP | LRR |
| <i>Brassica cretica</i> | KAF3545844.1 | RLP | LRR |
| <i>Brassica cretica</i> | KAF3545923.1 | RLP | LRR |
| <i>Brassica cretica</i> | KAF3546057.1 | RLP | LRR |
| <i>Brassica cretica</i> | KAF3546153.1 | RLP | LRR |
| <i>Brassica cretica</i> | KAF3546461.1 | RLP | LRR |
| <i>Brassica cretica</i> | KAF3547794.1 | RLP | LRR |
| <i>Brassica cretica</i> | KAF3548035.1 | RLP | LRR |
| <i>Brassica cretica</i> | KAF3548123.1 | RLP | LRR |
| <i>Brassica cretica</i> | KAF3548840.1 | RLP | LRR |
| <i>Brassica cretica</i> | KAF3549191.1 | RLP | LRR |
| <i>Brassica cretica</i> | KAF3549193.1 | RLP | LRR |
| <i>Brassica cretica</i> | KAF3550014.1 | RLP | LRR |
| <i>Brassica cretica</i> | KAF3550447.1 | RLP | LRR |
| <i>Brassica cretica</i> | KAF3550923.1 | RLP | LRR |
| <i>Brassica cretica</i> | KAF3551131.1 | RLP | LRR |
| <i>Brassica cretica</i> | KAF3551280.1 | RLP | LRR |
| <i>Brassica cretica</i> | KAF3551561.1 | RLP | LRR |
| <i>Brassica cretica</i> | KAF3551685.1 | RLP | LRR |
| <i>Brassica cretica</i> | KAF3551908.1 | RLP | LRR |
| <i>Brassica cretica</i> | KAF3551957.1 | RLP | LRR |
| <i>Brassica cretica</i> | KAF3561189.1 | RLP | LRR |
| <i>Brassica cretica</i> | KAF3561312.1 | RLP | LRR |
| <i>Brassica cretica</i> | KAF3561686.1 | RLP | LRR |
| <i>Brassica cretica</i> | KAF3562500.1 | RLP | LRR |
| <i>Brassica cretica</i> | KAF3563475.1 | RLP | LRR |
| <i>Brassica cretica</i> | KAF3563630.1 | RLP | LRR |
| <i>Brassica cretica</i> | KAF3564526.1 | RLP | LRR |
| <i>Brassica cretica</i> | KAF3565783.1 | RLP | LRR |
| <i>Brassica cretica</i> | KAF3566287.1 | RLP | LRR |
| <i>Brassica cretica</i> | KAF3567650.1 | RLP | LRR |
| <i>Brassica cretica</i> | KAF3568442.1 | RLP | LRR |
| <i>Brassica cretica</i> | KAF3568567.1 | RLP | LRR |
| <i>Brassica cretica</i> | KAF3568573.1 | RLP | LRR |
| <i>Brassica cretica</i> | KAF3569290.1 | RLP | LRR |
| <i>Brassica cretica</i> | KAF3575513.1 | RLP | LRR |
| <i>Brassica cretica</i> | KAF3576309.1 | RLP | LRR |
| <i>Brassica cretica</i> | KAF3577152.1 | RLP | LRR |
| <i>Brassica cretica</i> | KAF3577333.1 | RLP | LRR |
| <i>Brassica cretica</i> | KAF3577513.1 | RLP | LRR |
| <i>Brassica cretica</i> | KAF3577793.1 | RLP | LRR |
| <i>Brassica cretica</i> | KAF3578311.1 | RLP | LRR |
| <i>Brassica cretica</i> | KAF3578456.1 | RLP | LRR |
| <i>Brassica cretica</i> | KAF3578983.1 | RLP | LRR |
| <i>Brassica cretica</i> | KAF3579584.1 | RLP | LRR |
| <i>Brassica cretica</i> | KAF3579687.1 | RLP | LRR |
| <i>Brassica cretica</i> | KAF3580220.1 | RLP | LRR |
| <i>Brassica cretica</i> | KAF3580346.1 | RLP | LRR |
| <i>Brassica cretica</i> | KAF3580412.1 | RLP | LRR |
| <i>Brassica cretica</i> | KAF3580635.1 | RLP | LRR |
| <i>Brassica cretica</i> | KAF3581021.1 | RLP | LRR |
| <i>Brassica cretica</i> | KAF3581148.1 | RLP | LRR |
| <i>Brassica cretica</i> | KAF3582061.1 | RLP | LRR |
| <i>Brassica cretica</i> | KAF3582636.1 | RLP | LRR |
| <i>Brassica cretica</i> | KAF3590227.1 | RLP | LRR |
| <i>Brassica cretica</i> | KAF3590332.1 | RLP | LRR |
| <i>Brassica cretica</i> | KAF3590666.1 | RLP | LRR |
| <i>Brassica cretica</i> | KAF3590951.1 | RLP | LRR |
| <i>Brassica cretica</i> | KAF3592061.1 | RLP | LRR |

|                         |              |     |      |
|-------------------------|--------------|-----|------|
| <i>Brassica cretica</i> | KAF3592110.1 | RLP | LRR  |
| <i>Brassica cretica</i> | KAF3592667.1 | RLP | LRR  |
| <i>Brassica cretica</i> | KAF3593524.1 | RLP | LRR  |
| <i>Brassica cretica</i> | KAF3595765.1 | RLP | LRR  |
| <i>Brassica cretica</i> | KAF3595768.1 | RLP | LRR  |
| <i>Brassica cretica</i> | KAF3597435.1 | RLP | LRR  |
| <i>Brassica cretica</i> | KAF3597616.1 | RLP | LRR  |
| <i>Brassica cretica</i> | KAF3605208.1 | RLP | LRR  |
| <i>Brassica cretica</i> | KAF3605889.1 | RLP | LRR  |
| <i>Brassica cretica</i> | KAF3605935.1 | RLP | LRR  |
| <i>Brassica cretica</i> | KAF3606052.1 | RLP | LRR  |
| <i>Brassica cretica</i> | KAF3606447.1 | RLP | LRR  |
| <i>Brassica cretica</i> | KAF3606720.1 | RLP | LRR  |
| <i>Brassica cretica</i> | KAF3608524.1 | RLP | LRR  |
| <i>Brassica cretica</i> | KAF3611002.1 | RLP | LRR  |
| <i>Brassica cretica</i> | KAF3611148.1 | RLP | LRR  |
| <i>Brassica cretica</i> | KAF3611536.1 | RLP | LRR  |
| <i>Brassica cretica</i> | KAF3611574.1 | RLP | LRR  |
| <i>Brassica cretica</i> | KAF3611668.1 | RLP | Lysm |
| <i>Brassica cretica</i> | KAF3611753.1 | RLP | LRR  |
| <i>Brassica cretica</i> | KAF3612085.1 | RLP | LRR  |

\*note: Main RGA classes, NLR= nucleotide-binding site (NBS) -leucine rich repeats (LRR), RLK= receptor-like protein kinases (RLKs), RLP= receptor-like proteins. NLRs subclasses, CN= coiled-coil (CC)-NBS, CNL, NBS, NL= NBS-LRR, TNL= Toll/Interleukin-1 receptor (TIR)-NBS-LRR, TN= TIR-NBS, TX= TIR with unknown domains, Other-NLR= NLR with other domains; RLK subclasses, LRR-RLK, Lysin motif (Lysm )-RLK, Other (other-receptor)-RLK; RLP subclasses, LRR-RLP and Lysm-RLP.

**Table S2.** List of resistance gene analogs (RGAs) homologous to cloned disease resistance genes (R genes) and the E-value and similarity basis.

| Cloned R gene | Cloned R gene (RGA type) | Species | Gene/Homologs    | Similarity (%) | Alignmen<br>t length<br>(amino<br>acid) | Query<br>start<br>(bp) | Query end<br>(bp) | E-value   | RGA type  | RGA subclass in<br>comparison to the<br>cloned gene |
|---------------|--------------------------|---------|------------------|----------------|-----------------------------------------|------------------------|-------------------|-----------|-----------|-----------------------------------------------------|
| At_RLP1       | LRR-RLP                  | Aal     | Aa_G543910.h1.t1 | 72.297         | 148                                     | 880                    | 1027              | 1.18E-52  | LRR-RLP   | same                                                |
| At_RPS4       | TNL                      | Aal     | Aa_G122930.h1.t1 | 60.479         | 167                                     | 530                    | 696               | 1.15E-55  | Other-NLR | different                                           |
| At_RLM1b      | TNL                      | Aal     | Aa_G65760.h1.t1  | 63.758         | 149                                     | 10                     | 158               | 5.95E-56  | TNL       | same                                                |
| At_WRR4a      | TNL                      | Aal     | Aa_G65760.h1.t1  | 66.883         | 154                                     | 6                      | 159               | 2.39E-59  | TNL       | same                                                |
| At_RLM1a      | TNL                      | Aal     | Aa_G65760.h1.t1  | 65.789         | 152                                     | 7                      | 158               | 2.89E-60  | TNL       | same                                                |
| Bju_WRR1      | CNL                      | Aal     | Aa_G446450.h1.t1 | 63.351         | 191                                     | 1                      | 189               | 1.29E-61  | CNL       | same                                                |
| At_WRR4b      | TNL                      | Aal     | Aa_G65760.h1.t1  | 71.812         | 149                                     | 11                     | 159               | 2.76E-64  | TNL       | same                                                |
| At_RPP8       | CNL                      | Aal     | Aa_G446450.h1.t1 | 65.979         | 194                                     | 1                      | 194               | 8.31E-65  | CNL       | same                                                |
| Bra_cRa/cRb   | TNL                      | Aal     | Aa_G206860.h1.t1 | 61.17          | 188                                     | 73                     | 260               | 3.44E-65  | TX        | different                                           |
| At_WRR12      | TNL                      | Aal     | Aa_G278430.h1.t1 | 63.529         | 170                                     | 1                      | 170               | 1.68E-67  | TX        | different                                           |
| At_RFO3       | Other-RLK                | Aal     | Aa_G749180.h1.t1 | 62.011         | 179                                     | 515                    | 693               | 5.14E-69  | Other-RLK | same                                                |
| At_RPP1       | TNL                      | Aal     | Aa_G47200.h1.t1  | 61.421         | 197                                     | 84                     | 279               | 1.82E-70  | TX        | different                                           |
| At_WRR9       | NL                       | Aal     | Aa_G165270.h1.t1 | 60.096         | 208                                     | 17                     | 224               | 6.05E-72  | TNL       | different                                           |
| At_WRR4a      | TNL                      | Aal     | Aa_G574390.h1.t1 | 61.818         | 220                                     | 1                      | 218               | 1.84E-73  | Other-NLR | different                                           |
| Bol_FocBo1    | TNL                      | Aal     | Aa_G165270.h1.t1 | 60.09          | 223                                     | 9                      | 230               | 2.38E-77  | TNL       | same                                                |
| At_RLM1b      | TNL                      | Aal     | Aa_G563460.h1.t1 | 68.617         | 188                                     | 44                     | 231               | 2.99E-79  | TNL       | same                                                |
| At_WRR4b      | TNL                      | Aal     | Aa_G574390.h1.t1 | 63.426         | 216                                     | 7                      | 220               | 1.54E-79  | Other-NLR | different                                           |
| At_RPP1       | TNL                      | Aal     | Aa_G206860.h1.t1 | 60.829         | 217                                     | 68                     | 284               | 4.78E-80  | TX        | different                                           |
| At_RLM1b      | TNL                      | Aal     | Aa_G165270.h1.t1 | 65.7           | 207                                     | 13                     | 219               | 8.99E-81  | TNL       | same                                                |
| At_RLM1a      | TNL                      | Aal     | Aa_G574390.h1.t1 | 62.963         | 216                                     | 6                      | 219               | 5.05E-81  | Other-NLR | different                                           |
| At_RLM1b      | TNL                      | Aal     | Aa_G229750.h1.t1 | 64.186         | 215                                     | 5                      | 219               | 3.45E-81  | TNL       | same                                                |
| At_WRR4a      | TNL                      | Aal     | Aa_G165270.h1.t1 | 65.7           | 207                                     | 12                     | 218               | 5.42E-82  | TNL       | same                                                |
| At_WRR9       | NL                       | Aal     | Aa_G534280.h1.t1 | 61.638         | 232                                     | 453                    | 683               | 1.58E-82  | TX        | different                                           |
| At_RLM1b      | TNL                      | Aal     | Aa_G612790.h1.t1 | 61.572         | 229                                     | 5                      | 233               | 7.47E-84  | TNL       | same                                                |
| At_WRR4a      | TNL                      | Aal     | Aa_G612790.h1.t1 | 62.385         | 218                                     | 1                      | 218               | 3.76E-84  | TNL       | same                                                |
| At_WRR4a      | TNL                      | Aal     | Aa_G676850.h1.t1 | 62.212         | 217                                     | 11                     | 227               | 3.64E-84  | TX        | different                                           |
| At_RLM1b      | TNL                      | Aal     | Aa_G676850.h1.t1 | 64.516         | 217                                     | 12                     | 228               | 9.99E-85  | TX        | different                                           |
| At_WRR4a      | TNL                      | Aal     | Aa_G302440.h1.t1 | 61.792         | 212                                     | 12                     | 223               | 5.96E-85  | TX        | different                                           |
| At_WRR4a      | TNL                      | Aal     | Aa_G201150.h1.t1 | 63.134         | 217                                     | 3                      | 219               | 1.61E-85  | TX        | different                                           |
| At_RLM1a      | TNL                      | Aal     | Aa_G676850.h1.t1 | 63.38          | 213                                     | 12                     | 224               | 6.88E-86  | TX        | different                                           |
| At_RLM1a      | TNL                      | Aal     | Aa_G534280.h1.t1 | 60.262         | 229                                     | 449                    | 676               | 5.86E-86  | TX        | different                                           |
| At_WRR4b      | TNL                      | Aal     | Aa_G229750.h1.t1 | 64.651         | 215                                     | 6                      | 220               | 5.16E-86  | TNL       | same                                                |
| At_WRR4a      | TNL                      | Aal     | Aa_G225910.h1.t1 | 63.81          | 210                                     | 9                      | 218               | 4.38E-86  | TX        | different                                           |
| At_WRR4b      | TNL                      | Aal     | Aa_G165270.h1.t1 | 67.15          | 207                                     | 14                     | 220               | 1.93E-86  | TNL       | same                                                |
| At_RLM1a      | TNL                      | Aal     | Aa_G229750.h1.t1 | 65.116         | 215                                     | 5                      | 219               | 5.07E-88  | TNL       | same                                                |
| At_RLM1b      | TNL                      | Aal     | Aa_G534280.h1.t1 | 62.232         | 233                                     | 449                    | 681               | 4.52E-88  | TX        | different                                           |
| At_WRR4a      | TNL                      | Aal     | Aa_G276580.h1.t1 | 63.303         | 218                                     | 3                      | 220               | 3.26E-88  | TX        | different                                           |
| Bra_cRa/cRb   | TNL                      | Aal     | Aa_G563350.h1.t1 | 62.5           | 232                                     | 256                    | 480               | 9.44E-89  | NBS       | different                                           |
| At_RFO3       | Other-RLK                | Aal     | Aa_G241950.h1.t1 | 82.659         | 173                                     | 16                     | 178               | 1.97E-89  | Other-RLK | same                                                |
| At_WRR9       | NL                       | Aal     | Aa_G408900.h1.t1 | 63.229         | 223                                     | 5                      | 224               | 1.38E-89  | TX        | different                                           |
| At_RLM1a      | TNL                      | Aal     | Aa_G165270.h1.t1 | 69.565         | 207                                     | 13                     | 219               | 1.30E-89  | TNL       | same                                                |
| At_RPP1       | TNL                      | Aal     | Aa_G276580.h1.t1 | 62.857         | 210                                     | 97                     | 306               | 6.62E-90  | TX        | different                                           |
| At_RLM1b      | TNL                      | Aal     | Aa_G276580.h1.t1 | 66.063         | 221                                     | 1                      | 221               | 1.31E-90  | TX        | different                                           |
| At_WRR9       | NL                       | Aal     | Aa_G534280.h1.t1 | 62.946         | 224                                     | 15                     | 238               | 9.15E-91  | TX        | different                                           |
| At_WRR4b      | TNL                      | Aal     | Aa_G676850.h1.t1 | 66.82          | 217                                     | 13                     | 229               | 6.73E-91  | TX        | different                                           |
| Bra_Crr1a     | TNL                      | Aal     | Aa_G339760.h1.t1 | 67.453         | 212                                     | 65                     | 276               | 5.66E-91  | TX        | different                                           |
| At_RLM1b      | TNL                      | Aal     | Aa_G106970.h1.t1 | 61.638         | 232                                     | 10                     | 230               | 5.30E-91  | TX        | different                                           |
| At_WRR4b      | TNL                      | Aal     | Aa_G612790.h1.t1 | 65.455         | 220                                     | 1                      | 220               | 3.12E-91  | TNL       | same                                                |
| Bol_FocBo1    | TNL                      | Aal     | Aa_G792870.h1.t1 | 71.282         | 195                                     | 7                      | 200               | 6.87E-92  | TX        | different                                           |
| At_WRR4b      | TNL                      | Aal     | Aa_G201150.h1.t1 | 65.611         | 221                                     | 1                      | 221               | 3.47E-92  | TX        | different                                           |
| At_RLM1a      | TNL                      | Aal     | Aa_G616140.h1.t1 | 62.348         | 247                                     | 428                    | 673               | 2.05E-92  | TX        | different                                           |
| Bra_Crr1a     | TNL                      | Aal     | Aa_G563350.h1.t1 | 64.502         | 231                                     | 251                    | 474               | 1.16E-92  | NBS       | different                                           |
| At_RLM1a      | TNL                      | Aal     | Aa_G612790.h1.t1 | 66.667         | 219                                     | 1                      | 219               | 9.58E-93  | TNL       | same                                                |
| At_WRR9       | NL                       | Aal     | Aa_G616140.h1.t1 | 65.086         | 232                                     | 48                     | 278               | 5.68E-93  | TX        | different                                           |
| At_RPP2a      | TNL                      | Aal     | Aa_G415020.h1.t1 | 62.348         | 247                                     | 687                    | 933               | 4.72E-93  | NL        | different                                           |
| At_WRR9       | NL                       | Aal     | Aa_G106970.h1.t1 | 63.507         | 211                                     | 13                     | 223               | 4.02E-93  | TX        | different                                           |
| At_WRR4a      | TNL                      | Aal     | Aa_G534270.h1.t1 | 71.635         | 208                                     | 12                     | 219               | 1.11E-93  | TNL       | same                                                |
| At_RLM1b      | TNL                      | Aal     | Aa_G534270.h1.t1 | 72.596         | 208                                     | 13                     | 220               | 3.51E-94  | TNL       | same                                                |
| At_RLM1a      | TNL                      | Aal     | Aa_G201150.h1.t1 | 66.82          | 217                                     | 4                      | 220               | 2.45E-94  | TX        | different                                           |
| At_WRR9       | NL                       | Aal     | Aa_G65730.h1.t1  | 64.865         | 222                                     | 5                      | 226               | 1.39E-94  | TX        | different                                           |
| At_WRR4a      | TNL                      | Aal     | Aa_G106970.h1.t1 | 62.553         | 235                                     | 8                      | 231               | 1.06E-94  | TX        | different                                           |
| At_RLM1a      | TNL                      | Aal     | Aa_G302440.h1.t1 | 64.253         | 221                                     | 13                     | 233               | 5.28E-95  | TX        | different                                           |
| At_WRR4b      | TNL                      | Aal     | Aa_G276580.h1.t1 | 65.766         | 222                                     | 1                      | 222               | 3.98E-95  | TX        | different                                           |
| At_RLM1b      | TNL                      | Aal     | Aa_G616140.h1.t1 | 60.741         | 270                                     | 419                    | 678               | 3.80E-95  | TX        | different                                           |
| At_RPP1       | TNL                      | Aal     | Aa_G339760.h1.t1 | 67.925         | 212                                     | 93                     | 304               | 2.85E-95  | TX        | different                                           |
| At_RLM1b      | TNL                      | Aal     | Aa_G65730.h1.t1  | 68.018         | 222                                     | 1                      | 221               | 6.76E-96  | TX        | different                                           |
| At_WRR4a      | TNL                      | Aal     | Aa_G408900.h1.t1 | 67.568         | 222                                     | 1                      | 218               | 6.69E-97  | TX        | different                                           |
| At_RLM1a      | TNL                      | Aal     | Aa_G276580.h1.t1 | 67.873         | 221                                     | 1                      | 221               | 4.09E-98  | TX        | different                                           |
| At_RLM1b      | TNL                      | Aal     | Aa_G408900.h1.t1 | 69.507         | 223                                     | 1                      | 219               | 8.53E-100 | TX        | different                                           |
| At_WRR4a      | TNL                      | Aal     | Aa_G616140.h1.t1 | 67.965         | 231                                     | 43                     | 273               | 7.05E-101 | TX        | different                                           |
| At_WRR4a      | TNL                      | Aal     | Aa_G65730.h1.t1  | 71.622         | 222                                     | 1                      | 220               | 2.23E-101 | TX        | different                                           |
| At_RPP2a      | TNL                      | Aal     | Aa_G299630.h1.t1 | 61.433         | 293                                     | 1007                   | 1299              | 1.33E-102 | TX        | different                                           |
| At_RLM1a      | TNL                      | Aal     | Aa_G534270.h1.t1 | 75.962         | 208                                     | 13                     | 220               | 7.30E-103 | TNL       | same                                                |
| At_RPP2b      | TNL                      | Aal     | Aa_G503780.h1.t1 | 66.154         | 260                                     | 222                    | 479               | 1.99E-103 | NBS       | different                                           |
| At_RLM1a      | TNL                      | Aal     | Aa_G106970.h1.t1 | 67.965         | 231                                     | 10                     | 229               | 7.26E-106 | TX        | different                                           |
| At_RRS1       | TNL                      | Aal     | Aa_G488000.h1.t1 | 67.816         | 261                                     | 435                    | 683               | 1.50E-106 | TNL       | same                                                |
| At_WRR4b      | TNL                      | Aal     | Aa_G534270.h1.t1 | 78.365         | 208                                     | 14                     | 221               | 3.63E-107 | TNL       | same                                                |
| Bna_Rlm9/4/7  | Other-RLK                | Aal     | Aa_G412470.h1.t1 | 60.678         | 295                                     | 506                    | 794               | 6.20E-108 | Other-RLK | same                                                |
| At_WRR4b      | TNL                      | Aal     | Aa_G106970.h1.t1 | 69.828         | 232                                     | 11                     | 231               | 8.29E-109 | TX        | different                                           |
| At_RAC1       | TNL                      | Aal     | Aa_G710830.h1.t1 | 73.568         | 227                                     | 8                      | 231               | 5.59E-109 | TX        | different                                           |

|              |           |     |                  |        |      |      |      |           |           |           |
|--------------|-----------|-----|------------------|--------|------|------|------|-----------|-----------|-----------|
| At_WRR4a     | TNL       | Aal | Aa_G534280.h1.t1 | 72.444 | 225  | 9    | 233  | 3.02E-109 | TX        | different |
| At_RRS1      | TNL       | Aal | Aa_G636220.h1.t1 | 69.173 | 266  | 425  | 678  | 2.72E-109 | TNL       | same      |
| At_WRR8      | TNL       | Aal | Aa_G710830.h1.t1 | 73.128 | 227  | 19   | 241  | 1.41E-109 | TX        | different |
| At_WRR9      | NL        | Aal | Aa_G365200.h1.t1 | 62.153 | 288  | 301  | 587  | 1.23E-109 | TN        | different |
| At_RLM1b     | TNL       | Aal | Aa_G534280.h1.t1 | 73.661 | 224  | 10   | 233  | 7.80E-110 | TX        | different |
| At_RLM1a     | TNL       | Aal | Aa_G65730.h1.t1  | 75.225 | 222  | 1    | 221  | 6.49E-110 | TX        | different |
| At_WRR4b     | TNL       | Aal | Aa_G408900.h1.t1 | 74.107 | 224  | 1    | 220  | 4.26E-111 | TX        | different |
| At_RLM1a     | TNL       | Aal | Aa_G616140.h1.t1 | 72.727 | 231  | 44   | 274  | 2.32E-112 | TX        | different |
| At_WRR4b     | TNL       | Aal | Aa_G616140.h1.t1 | 73.799 | 229  | 45   | 273  | 1.17E-112 | TX        | different |
| At_RLM1b     | TNL       | Aal | Aa_G616140.h1.t1 | 75.325 | 231  | 44   | 274  | 1.95E-113 | TX        | different |
| At_WRR4b     | TNL       | Aal | Aa_G65730.h1.t1  | 78.281 | 221  | 3    | 222  | 8.31E-114 | TX        | different |
| At_RFO1      | Other-RLK | Aal | Aa_G293710.h1.t1 | 63.636 | 286  | 277  | 561  | 1.81E-114 | Other-RLK | same      |
| At_RRS1      | TNL       | Aal | Aa_G636220.h1.t1 | 62.429 | 354  | 1    | 352  | 1.30E-115 | TNL       | same      |
| At_RPP2a     | TNL       | Aal | Aa_G369060.h1.t1 | 63.158 | 304  | 115  | 414  | 9.48E-117 | TNL       | same      |
| Bol_FocBo1   | TNL       | Aal | Aa_G24630.h1.t1  | 65.942 | 276  | 97   | 372  | 1.84E-117 | TX        | different |
| At_RLM1a     | TNL       | Aal | Aa_G534280.h1.t1 | 78.222 | 225  | 10   | 234  | 5.65E-121 | TX        | different |
| At_WRR4b     | TNL       | Aal | Aa_G534280.h1.t1 | 77.778 | 234  | 1    | 234  | 1.93E-121 | TX        | different |
| At_RRS1      | TNL       | Aal | Aa_G488000.h1.t1 | 60.623 | 353  | 1    | 352  | 1.47E-121 | TNL       | same      |
| At_RPP5      | TNL       | Aal | Aa_G902620.h1.t1 | 61.243 | 338  | 1    | 330  | 2.30E-122 | TN        | different |
| At_RPP2a     | TNL       | Aal | Aa_G565780.h1.t1 | 61.585 | 328  | 93   | 414  | 1.59E-123 | TNL       | same      |
| At_RFO1      | Other-RLK | Aal | Aa_G265680.h1.t1 | 64.026 | 303  | 423  | 719  | 8.86E-127 | Other-RLK | same      |
| At_RLP30     | LRR-RLP   | Aal | Aa_G319570.h1.t1 | 62.342 | 316  | 470  | 777  | 3.10E-127 | LRR-RLP   | same      |
| At_RPP4      | TNL       | Aal | Aa_G902620.h1.t1 | 61.791 | 335  | 1    | 328  | 5.52E-129 | TN        | different |
| At_RPP13     | CNL       | Aal | Aa_G634840.h1.t1 | 74.632 | 272  | 13   | 281  | 1.61E-129 | CNL       | same      |
| At_RLM3      | TN        | Aal | Aa_G902620.h1.t1 | 60.55  | 327  | 3    | 322  | 6.44E-130 | TN        | same      |
| At_WRR4b     | TNL       | Aal | Aa_G589470.h1.t1 | 64.465 | 318  | 95   | 410  | 1.14E-130 | TN        | different |
| Bol_FocBo1   | TNL       | Aal | Aa_G902620.h1.t1 | 63.889 | 324  | 7    | 324  | 5.65E-139 | TN        | different |
| At_RPP2a     | TNL       | Aal | Aa_G295940.h1.t1 | 60.396 | 404  | 11   | 414  | 1.17E-141 | TNL       | same      |
| At_RPP1      | TNL       | Aal | Aa_G360810.h1.t1 | 60.582 | 378  | 59   | 431  | 4.27E-142 | TNL       | same      |
| Bna_Rlm9/4/7 | Other-RLK | Aal | Aa_G265680.h1.t1 | 69.325 | 326  | 454  | 779  | 5.86E-144 | Other-RLK | same      |
| At_RLM1a     | TNL       | Aal | Aa_G589470.h1.t1 | 67.712 | 319  | 93   | 410  | 1.20E-144 | TN        | different |
| At_RFO1      | Other-RLK | Aal | Aa_G556850.h1.t1 | 65.964 | 332  | 426  | 751  | 3.23E-147 | Other-RLK | same      |
| Bna_Rlm9/4/7 | Other-RLK | Aal | Aa_G293710.h1.t1 | 82.721 | 272  | 324  | 594  | 4.34E-148 | Other-RLK | same      |
| Bra_cRa/cRb  | TNL       | Aal | Aa_G146330.h1.t1 | 60.207 | 387  | 73   | 458  | 2.67E-148 | TNL       | same      |
| At_RPP2a     | TNL       | Aal | Aa_G415020.h1.t1 | 79.522 | 293  | 1007 | 1299 | 5.92E-155 | NL        | different |
| Bra_cRa/cRb  | TNL       | Aal | Aa_G360810.h1.t1 | 62.47  | 413  | 1    | 411  | 4.30E-156 | TNL       | same      |
| Bra_cRa/cRb  | TNL       | Aal | Aa_G84490.h1.t1  | 66.762 | 349  | 97   | 445  | 2.13E-157 | TNL       | same      |
| At_RLP30     | LRR-RLP   | Aal | Aa_G245790.h1.t1 | 61.055 | 398  | 386  | 782  | 6.23E-159 | LRR-RLP   | same      |
| At_RPP2a     | TNL       | Aal | Aa_G173310.h1.t1 | 61.098 | 419  | 1    | 414  | 6.58E-162 | TNL       | same      |
| At_RPP2a     | TNL       | Aal | Aa_G628640.h1.t1 | 60.097 | 411  | 10   | 414  | 5.39E-162 | TNL       | same      |
| At_RPP2a     | TNL       | Aal | Aa_G628630.h1.t1 | 63.119 | 404  | 11   | 414  | 4.65E-162 | TNL       | same      |
| At_RPP1      | TNL       | Aal | Aa_G84490.h1.t1  | 67.435 | 347  | 121  | 467  | 3.72E-162 | TNL       | same      |
| Bra_Crr1a    | TNL       | Aal | Aa_G447910.h1.t1 | 60.671 | 417  | 52   | 464  | 6.55E-163 | TNL       | same      |
| At_RPP2a     | TNL       | Aal | Aa_G486460.h1.t1 | 60.75  | 400  | 2    | 396  | 1.99E-163 | TN        | different |
| Bra_Crr1a    | TNL       | Aal | Aa_G84490.h1.t1  | 69.54  | 348  | 92   | 439  | 1.86E-164 | TNL       | same      |
| At_WRR4a     | TNL       | Aal | Aa_G65800.h1.t1  | 60.465 | 430  | 1    | 427  | 1.67E-165 | TN        | different |
| Bra_cRa/cRb  | TNL       | Aal | Aa_G332260.h1.t1 | 60.945 | 402  | 73   | 473  | 6.25E-166 | TN        | different |
| At_ADR1      | NL        | Aal | Aa_G811740.h1.t1 | 65.449 | 356  | 216  | 560  | 1.04E-167 | NL        | same      |
| Bra_Crr1a    | TNL       | Aal | Aa_G146330.h1.t1 | 64.691 | 388  | 68   | 455  | 5.30E-169 | TNL       | same      |
| At_WRR9      | NL        | Aal | Aa_G65800.h1.t1  | 61.893 | 412  | 5    | 414  | 1.41E-169 | TN        | different |
| At_RLM3      | TN        | Aal | Aa_G486460.h1.t1 | 60.05  | 403  | 1    | 394  | 3.17E-170 | TN        | same      |
| At_RPP2a     | TNL       | Aal | Aa_G620000.h1.t1 | 63.133 | 415  | 8    | 414  | 1.32E-170 | TNL       | same      |
| At_RPP1      | TNL       | Aal | Aa_G447910.h1.t1 | 61.449 | 428  | 69   | 492  | 2.01E-174 | TNL       | same      |
| Bra_Crr1a    | TNL       | Aal | Aa_G360810.h1.t1 | 74.854 | 342  | 66   | 406  | 8.34E-175 | TNL       | same      |
| At_RPP2a     | TNL       | Aal | Aa_G295950.h1.t1 | 66.019 | 412  | 3    | 414  | 2.49E-175 | TNL       | same      |
| At_RLM1b     | TNL       | Aal | Aa_G65800.h1.t1  | 64.891 | 413  | 1    | 410  | 6.79E-177 | TN        | different |
| At_WRR4b     | TNL       | Aal | Aa_G65800.h1.t1  | 60.377 | 477  | 4    | 474  | 1.44E-177 | TN        | different |
| Bra_Crr1a    | TNL       | Aal | Aa_G332260.h1.t1 | 64.764 | 403  | 67   | 468  | 5.57E-178 | TN        | different |
| At_RPP5      | TNL       | Aal | Aa_G295910.h1.t1 | 63.193 | 451  | 1    | 443  | 2.48E-178 | TNL       | same      |
| At_BAK1      | LRR-RLK   | Aal | Aa_G609980.h1.t1 | 94.797 | 615  | 1    | 615  | 0         | LRR-RLK   | same      |
| At_RFO3      | Other-RLK | Aal | Aa_G241950.h1.t1 | 85.169 | 472  | 389  | 850  | 0         | Other-RLK | same      |
| At_RPS2      | NL        | Aal | Aa_G43080.h1.t1  | 85     | 740  | 170  | 909  | 0         | CNL       | different |
| At_RLP1      | LRR-RLP   | Aal | Aa_G275730.h1.t1 | 83.221 | 888  | 190  | 1076 | 0         | LRR-RLP   | same      |
| At_RFO1      | Other-RLK | Aal | Aa_G265710.h1.t1 | 83.109 | 521  | 236  | 751  | 0         | Other-RLK | same      |
| At_SOBR1     | LRR-RLK   | Aal | Aa_G154740.h1.t1 | 82.492 | 634  | 8    | 641  | 0         | LRR-RLK   | same      |
| At_FLS2      | LRR-RLK   | Aal | Aa_G524900.h1.t1 | 80.703 | 1109 | 21   | 1125 | 0         | LRR-RLK   | same      |
| At_NGR1a     | RNL       | Aal | Aa_G180800.h1.t1 | 80.025 | 816  | 1    | 809  | 0         | NL        | different |
| Bna_Rlm9/4/7 | Other-RLK | Aal | Aa_G21490.h1.t1  | 79.802 | 505  | 297  | 794  | 0         | Other-RLK | same      |
| At_BAK1      | LRR-RLK   | Aal | Aa_G377020.h1.t1 | 78.352 | 619  | 9    | 615  | 0         | LRR-RLK   | same      |
| At_BAK1      | LRR-RLK   | Aal | Aa_G245800.h1.t1 | 77.724 | 624  | 4    | 615  | 0         | LRR-RLK   | same      |
| At_RPP2a     | TNL       | Aal | Aa_G299570.h1.t1 | 76.027 | 876  | 425  | 1299 | 0         | TNL       | same      |
| At_RPM1      | NL        | Aal | Aa_G78900.h1.t1  | 75.512 | 927  | 1    | 926  | 0         | NL        | same      |
| At_RPP2b     | TNL       | Aal | Aa_G503790.h1.t1 | 74.814 | 1207 | 3    | 1207 | 0         | TNL       | same      |
| At_RPP8      | CNL       | Aal | Aa_G446440.h1.t1 | 70.975 | 913  | 1    | 907  | 0         | NL        | different |
| At_RPP2a     | TNL       | Aal | Aa_G299590.h1.t1 | 70.126 | 713  | 579  | 1288 | 0         | TNL       | same      |
| At_RFO2      | LRR-RLP   | Aal | Aa_G347880.h1.t1 | 69.12  | 693  | 45   | 737  | 0         | LRR-RLK   | different |
| At_RPP1      | TNL       | Aal | Aa_G146330.h1.t1 | 68.912 | 386  | 96   | 481  | 0         | TNL       | same      |
| Bna_Rlm9/4/7 | Other-RLK | Aal | Aa_G30130.h1.t1  | 68.908 | 476  | 282  | 727  | 0         | Other-RLK | same      |
| Bol_FocBo1   | TNL       | Aal | Aa_G486460.h1.t1 | 68.702 | 393  | 9    | 396  | 0         | TN        | different |
| Bna_Rlm9/4/7 | Other-RLK | Aal | Aa_G265690.h1.t1 | 67.213 | 488  | 113  | 595  | 0         | Other-RLK | same      |
| At_NGR1b     | RNL       | Aal | Aa_G180800.h1.t1 | 67.193 | 823  | 3    | 815  | 0         | NL        | different |
| At_RLM1a     | TNL       | Aal | Aa_G65800.h1.t1  | 67.073 | 410  | 3    | 410  | 0         | TN        | different |
| At_RLP23     | LRR-RLP   | Aal | Aa_G183780.h1.t1 | 66.996 | 709  | 183  | 890  | 0         | LRR-RLP   | same      |
| Bna_Rlm9/4/7 | Other-RLK | Aal | Aa_G323670.h1.t1 | 66.667 | 435  | 361  | 793  | 0         | Other-RLK | same      |
| At_RLP42     | LRR-RLP   | Aal | Aa_G183780.h1.t1 | 66.619 | 701  | 183  | 881  | 0         | LRR-RLP   | same      |
| At_RPP13     | CNL       | Aal | Aa_G500650.h1.t1 | 66.435 | 864  | 1    | 830  | 0         | CNL       | same      |

|                |           |     |                  |        |      |     |      |           |           |           |
|----------------|-----------|-----|------------------|--------|------|-----|------|-----------|-----------|-----------|
| Bol_FocBo1     | TNL       | Aal | Aa_G628630.h1.t1 | 66.202 | 645  | 10  | 653  | 0         | TNL       | same      |
| At_RLP23       | LRR-RLP   | Aal | Aa_G208770.h1.t1 | 66.096 | 643  | 248 | 890  | 0         | LRR-RLP   | same      |
| At_NGR1a       | RNL       | Aal | Aa_G180780.h1.t1 | 66.091 | 637  | 177 | 809  | 0         | NL        | different |
| At_RPS4        | TNL       | Aal | Aa_G488020.h1.t1 | 66.034 | 1160 | 13  | 1163 | 0         | Other-NLR | different |
| At_RLP42       | LRR-RLP   | Aal | Aa_G208770.h1.t1 | 65.984 | 635  | 249 | 879  | 0         | LRR-RLP   | same      |
| Bra_Crr1a      | TNL       | Aal | Aa_G578400.h1.t1 | 65.772 | 596  | 119 | 692  | 0         | TNL       | same      |
| At_RPS5        | TNL       | Aal | Aa_G521440.h1.t1 | 65.692 | 889  | 1   | 883  | 0         | CNL       | different |
| At_RLP42       | LRR-RLP   | Aal | Aa_G201920.h1.t1 | 65.394 | 864  | 22  | 879  | 0         | LRR-RLP   | same      |
| At_RLP23       | LRR-RLP   | Aal | Aa_G201920.h1.t1 | 65.233 | 860  | 33  | 890  | 0         | LRR-RLP   | same      |
| Bna_Rlm9/4/7   | Other-RLK | Aal | Aa_G557360.h1.t1 | 65.228 | 417  | 324 | 737  | 0         | Other-RLK | same      |
| Bol_FocBo1     | TNL       | Aal | Aa_G295940.h1.t1 | 65.227 | 1366 | 10  | 1349 | 0         | TNL       | same      |
| At_RLP23       | LRR-RLP   | Aal | Aa_G183750.h1.t1 | 65.12  | 711  | 182 | 890  | 0         | LRR-RLP   | same      |
| Bna_Rlm9/4/7   | Other-RLK | Aal | Aa_G293690.h1.t1 | 65.108 | 556  | 250 | 793  | 0         | Other-RLK | same      |
| At_RFO1        | Other-RLK | Aal | Aa_G30130.h1.t1  | 65.057 | 435  | 290 | 696  | 0         | Other-RLK | same      |
| At_RLP42       | LRR-RLP   | Aal | Aa_G183750.h1.t1 | 64.95  | 699  | 182 | 878  | 0         | LRR-RLP   | same      |
| At_RPS5        | TNL       | Aal | Aa_G366140.h1.t1 | 64.926 | 881  | 1   | 880  | 0         | CNL       | different |
| At_ADR1        | NL        | Aal | Aa_G636220.h1.t1 | 64.89  | 544  | 245 | 787  | 0         | TNL       | different |
| At_RPS5        | TNL       | Aal | Aa_G124650.h1.t1 | 64.713 | 887  | 1   | 880  | 0         | CNL       | different |
| At_RPP1        | TNL       | Aal | Aa_G332260.h1.t1 | 64.516 | 403  | 95  | 496  | 0         | TN        | different |
| At_RLP23       | LRR-RLP   | Aal | Aa_G363510.h1.t1 | 64.106 | 716  | 175 | 888  | 0         | LRR-RLP   | same      |
| At_RPP7        | NL        | Aal | Aa_G323330.h1.t1 | 64.097 | 869  | 3   | 866  | 0         | NL        | same      |
| At_RLP42       | LRR-RLP   | Aal | Aa_G363510.h1.t1 | 63.781 | 693  | 182 | 873  | 0         | LRR-RLP   | same      |
| Bol_FocBo1     | TNL       | Aal | Aa_G295950.h1.t1 | 63.695 | 1088 | 7   | 1094 | 0         | TNL       | same      |
| At_RPP8        | CNL       | Aal | Aa_G446450.h1.t1 | 63.537 | 639  | 273 | 904  | 0         | CNL       | same      |
| At_RPS5        | TNL       | Aal | Aa_G193720.h1.t1 | 63.39  | 885  | 1   | 883  | 0         | CNL       | different |
| At_RLP23       | LRR-RLP   | Aal | Aa_G183740.h1.t1 | 63.26  | 724  | 172 | 890  | 0         | LRR-RLP   | same      |
| At_RFO1        | Other-RLK | Aal | Aa_G323670.h1.t1 | 63.134 | 434  | 326 | 751  | 0         | Other-RLK | same      |
| At_NGR1a       | RNL       | Aal | Aa_G180770.h1.t1 | 63.086 | 810  | 10  | 804  | 0         | NL        | different |
| At_RPP2a       | TNL       | Aal | Aa_G299610.h1.t1 | 63.082 | 558  | 748 | 1299 | 0         | NL        | different |
| At_NGR1b       | RNL       | Aal | Aa_G180770.h1.t1 | 62.885 | 811  | 12  | 813  | 0         | NL        | different |
| At_WRR8        | TNL       | Aal | Aa_G208030.h1.t1 | 62.801 | 707  | 5   | 704  | 0         | TNL       | same      |
| At_RLM1b       | TNL       | Aal | Aa_G398600.h1.t1 | 62.718 | 1030 | 10  | 1013 | 0         | TNL       | same      |
| At_RLP30       | LRR-RLP   | Aal | Aa_G21020.h1.t1  | 62.636 | 736  | 46  | 774  | 0         | LRR-RLP   | same      |
| Bra_cRa/cRb    | TNL       | Aal | Aa_G578400.h1.t1 | 61.864 | 590  | 124 | 695  | 0         | TNL       | same      |
| At_RLP42       | LRR-RLP   | Aal | Aa_G183740.h1.t1 | 61.833 | 731  | 172 | 889  | 0         | LRR-RLP   | same      |
| At_RAC1        | TNL       | Aal | Aa_G208030.h1.t1 | 61.744 | 711  | 3   | 703  | 0         | TNL       | same      |
| At_RLM1b       | TNL       | Aal | Aa_G65950.h1.t1  | 61.715 | 1003 | 1   | 995  | 0         | TNL       | same      |
| Bju_WRR1       | CNL       | Aal | Aa_G446440.h1.t1 | 61.63  | 920  | 1   | 900  | 0         | NL        | different |
| Bol_FocBo1     | TNL       | Aal | Aa_G173310.h1.t1 | 61.57  | 968  | 5   | 960  | 0         | TNL       | same      |
| At_NGR1b       | RNL       | Aal | Aa_G180780.h1.t1 | 61.502 | 639  | 181 | 815  | 0         | NL        | different |
| At_RLP32       | LRR-RLP   | Aal | Aa_G333250.h1.t1 | 61.481 | 810  | 121 | 854  | 0         | LRR-RLP   | same      |
| At_RFO1        | Other-RLK | Aal | Aa_G21490.h1.t1  | 61.46  | 493  | 270 | 750  | 0         | Other-RLK | same      |
| At_RLM1a       | TNL       | Aal | Aa_G65950.h1.t1  | 61.419 | 902  | 1   | 897  | 0         | TNL       | same      |
| At_RLP32       | LRR-RLP   | Aal | Aa_G216090.h1.t1 | 61.346 | 921  | 1   | 853  | 0         | LRR-RLP   | same      |
| At_WRR8        | TNL       | Aal | Aa_G208060.h1.t1 | 61.011 | 554  | 31  | 576  | 0         | TN        | different |
| Bol_FocBo1     | TNL       | Aal | Aa_G620000.h1.t1 | 60.95  | 968  | 7   | 960  | 0         | TNL       | same      |
| At_RPP1        | TNL       | Aal | Aa_G146320.h1.t1 | 60.943 | 594  | 95  | 687  | 0         | TN        | different |
| At_RFO1        | Other-RLK | Aal | Aa_G557360.h1.t1 | 60.89  | 427  | 287 | 712  | 0         | Other-RLK | same      |
| At_RRS1        | TNL       | Aal | Aa_G519310.h1.t1 | 60.881 | 1181 | 1   | 1168 | 0         | TNL       | same      |
| Bra_Crr1a      | TNL       | Aal | Aa_G753220.h1.t1 | 60.569 | 738  | 92  | 822  | 0         | TNL       | same      |
| At_RFO1        | Other-RLK | Aal | Aa_G148280.h1.t1 | 60.544 | 735  | 7   | 721  | 0         | Other-RLK | same      |
| At_RLP30       | LRR-RLP   | Aal | Aa_G245780.h1.t1 | 60.514 | 623  | 166 | 786  | 0         | LRR-RLP   | same      |
| At_RPP5        | TNL       | Aal | Aa_G628630.h1.t1 | 60.443 | 632  | 12  | 632  | 0         | TNL       | same      |
| At_RAC1        | TNL       | Aal | Aa_G208060.h1.t1 | 60.436 | 551  | 20  | 562  | 0         | TN        | different |
| At_RLM1a       | TNL       | Aal | Aa_G65780.h1.t1  | 60.349 | 918  | 3   | 898  | 0         | TNL       | same      |
| Bra_Crr1a      | TNL       | Aal | Aa_G146320.h1.t1 | 60.345 | 638  | 29  | 661  | 0         | TN        | different |
| At_RAC1        | TNL       | Aal | Aa_G33030.h1.t1  | 60.244 | 737  | 9   | 736  | 0         | TNL       | same      |
| At_ADR1        | NL        | Aal | Aa_G719500.h1.t1 | 60.241 | 581  | 6   | 560  | 0         | NBS       | different |
| At_RPS5        | TNL       | Aal | Aa_G193750.h1.t1 | 60.136 | 883  | 1   | 878  | 0         | CNL       | different |
| At_WRR8        | TNL       | Aal | Aa_G33030.h1.t1  | 60.081 | 744  | 20  | 755  | 0         | TNL       | same      |
| At_RPP4        | TNL       | Chi | CARHR222470      | 61.667 | 180  | 687 | 858  | 2.02E-57  | TNL       | same      |
| At_RPP7        | NL        | Chi | CARHR123290      | 67.066 | 167  | 573 | 739  | 1.10E-57  | LRR-RLP   | different |
| At_RFO3        | Other-RLK | Chi | CARHR051100      | 63.855 | 166  | 512 | 677  | 6.42E-64  | Other-RLK | same      |
| At_RLP32       | LRR-RLP   | Chi | CARHR105480      | 60.104 | 193  | 663 | 853  | 2.11E-64  | LRR-RLP   | same      |
| Bna_LepR3/Rlm2 | LRR-RLP   | Chi | CARHR105480      | 60.488 | 205  | 746 | 950  | 1.08E-68  | LRR-RLP   | same      |
| At_RPS5        | TNL       | Chi | CARHR048930      | 62.573 | 171  | 168 | 338  | 7.77E-71  | NBS       | different |
| At_NGR1a       | RNL       | Chi | CARHR177820      | 65.5   | 200  | 153 | 352  | 4.84E-74  | NBS       | different |
| At_RLP30       | LRR-RLP   | Chi | CARHR291370      | 62.562 | 203  | 525 | 722  | 2.38E-75  | LRR-RLP   | same      |
| At_RLP42       | LRR-RLP   | Chi | CARHR126950      | 64.078 | 206  | 686 | 886  | 8.58E-76  | LRR-RLP   | same      |
| At_RFO3        | Other-RLK | Chi | CARHR230490      | 63.483 | 178  | 515 | 692  | 1.57E-77  | Other-RLK | same      |
| At_RFO3        | Other-RLK | Chi | CARHR230490      | 63.483 | 178  | 515 | 692  | 7.66E-78  | Other-RLK | same      |
| At_RPP7        | NL        | Chi | CARHR284010      | 70.95  | 179  | 415 | 591  | 4.38E-80  | NL        | same      |
| At_RPS5        | TNL       | Chi | CARHR049610      | 61.353 | 207  | 302 | 508  | 6.34E-81  | NBS       | different |
| At_RLP23       | LRR-RLP   | Chi | CARHR126950      | 68.137 | 204  | 686 | 889  | 1.30E-81  | LRR-RLP   | same      |
| At_RPP7        | NL        | Chi | CARHR284080      | 71.892 | 185  | 126 | 309  | 1.04E-82  | NBS       | different |
| At_RLP30       | LRR-RLP   | Chi | CARHR118040      | 67.241 | 232  | 549 | 780  | 5.27E-89  | LRR-RLP   | same      |
| At_ADR1        | NL        | Chi | CARHR033020      | 78.313 | 166  | 323 | 488  | 7.95E-90  | NBS       | different |
| At_RFO1        | Other-RLK | Chi | CARHR062770      | 65.686 | 204  | 350 | 552  | 8.34E-92  | Other-RLK | same      |
| At_NGR1b       | RNL       | Chi | CARHR292120      | 67.873 | 221  | 337 | 555  | 6.77E-96  | CN        | different |
| At_NGR1b       | RNL       | Chi | CARHR292120      | 67.873 | 221  | 337 | 555  | 2.55E-96  | CN        | different |
| At_NGR1a       | RNL       | Chi | CARHR292120      | 71.364 | 220  | 334 | 549  | 7.77E-101 | CN        | different |
| At_NGR1a       | RNL       | Chi | CARHR292120      | 71.233 | 219  | 335 | 549  | 6.51E-101 | CN        | different |
| At_RPP39       | CNL       | Chi | CARHR052120      | 63.469 | 271  | 24  | 293  | 4.28E-111 | CN        | different |
| At_RRS1        | TNL       | Chi | CARHR176990      | 67.279 | 272  | 902 | 1170 | 3.26E-111 | TX        | different |
| At_RPS5        | TNL       | Chi | CARHR049180      | 62.411 | 282  | 1   | 282  | 1.36E-114 | CN        | different |
| At_RAC1        | TNL       | Chi | CARHR174840      | 68.44  | 282  | 103 | 383  | 2.34E-115 | TNL       | same      |



|                |           |     |             |        |      |     |      |           |           |           |
|----------------|-----------|-----|-------------|--------|------|-----|------|-----------|-----------|-----------|
| At_RPP39       | CNL       | Chi | CARHR052120 | 61.905 | 294  | 1   | 293  | 1.06E-117 | CN        | different |
| Bna_Rlm9/4/7   | Other-RLK | Chi | CARHR062770 | 85.366 | 205  | 381 | 585  | 2.22E-119 | Other-RLK | same      |
| At_RAC1        | TNL       | Chi | CARHR289490 | 66.441 | 295  | 4   | 294  | 3.26E-120 | TX        | different |
| At_RPP7        | NL        | Chi | CARHR284050 | 68.359 | 256  | 353 | 606  | 1.33E-120 | NL        | same      |
| At_RPP2a       | TNL       | Chi | CARHR223500 | 65.931 | 317  | 98  | 414  | 1.67E-124 | Other-NLR | different |
| At_RAC1        | TNL       | Chi | CARHR175240 | 64.725 | 309  | 218 | 523  | 3.09E-125 | NBS       | different |
| At_WRR8        | TNL       | Chi | CARHR289490 | 67.007 | 294  | 15  | 304  | 2.75E-126 | TX        | different |
| At_NGR1b       | RNL       | Chi | CARHR177840 | 65.517 | 319  | 135 | 450  | 5.03E-129 | NBS       | different |
| At_BAK1        | LRR-RLK   | Chi | CARHR176190 | 61.875 | 320  | 255 | 573  | 9.00E-134 | LRR-RLK   | same      |
| At_RLM3        | TN        | Chi | CARHR222990 | 60.92  | 348  | 3   | 350  | 2.50E-135 | TN        | same      |
| Bra_Crr1a      | TNL       | Chi | CARHR071840 | 65.046 | 329  | 68  | 395  | 1.08E-139 | TN        | different |
| At_NGR1a       | RNL       | Chi | CARHR177840 | 73.63  | 292  | 154 | 444  | 2.31E-140 | NL        | different |
| Bna_Rlm9/4/7   | Other-RLK | Chi | CARHR016630 | 75     | 268  | 396 | 662  | 9.59E-141 | Other-RLK | same      |
| Bna_Rlm9/4/7   | Other-RLK | Chi | CARHR016630 | 75     | 268  | 396 | 662  | 9.59E-141 | Other-RLK | same      |
| At_RPP4        | TNL       | Chi | CARHR223500 | 63.868 | 393  | 100 | 488  | 2.23E-144 | TX        | different |
| At_RLP42       | LRR-RLP   | Chi | CARHR127040 | 61.298 | 416  | 20  | 434  | 1.10E-146 | LRR-RLP   | same      |
| At_RFO1        | Other-RLK | Chi | CARHR016630 | 81.452 | 248  | 383 | 629  | 2.02E-148 | Other-RLK | same      |
| At_RFO1        | Other-RLK | Chi | CARHR016630 | 81.452 | 248  | 383 | 629  | 2.02E-148 | Other-RLK | same      |
| At_RRS1        | TNL       | Chi | CARHR177150 | 67.705 | 353  | 8   | 357  | 2.38E-150 | TN        | different |
| At_WRR8        | TNL       | Chi | CARHR175240 | 72.581 | 310  | 228 | 535  | 1.53E-150 | NBS       | different |
| At_RLM1b       | TNL       | Chi | CARHR213880 | 64.266 | 361  | 52  | 411  | 3.97E-152 | NBS       | different |
| At_RAC1        | TNL       | Chi | CARHR174840 | 66.489 | 376  | 9   | 383  | 2.50E-153 | TNL       | same      |
| At_RLP23       | LRR-RLP   | Chi | CARHR127040 | 60.952 | 420  | 17  | 434  | 4.76E-155 | LRR-RLP   | same      |
| At_RPS5        | TNL       | Chi | CARHR220850 | 64.77  | 369  | 8   | 376  | 1.58E-155 | CNL       | different |
| At_RRS1        | TNL       | Chi | CARHR177010 | 73.214 | 336  | 9   | 338  | 9.53E-157 | NBS       | different |
| At_RLP1        | LRR-RLP   | Chi | CARHR185740 | 65.897 | 390  | 667 | 1053 | 2.88E-159 | LRR-RLP   | same      |
| Bna_LepR3/Rlm2 | LRR-RLP   | Chi | CARHR105510 | 71.023 | 352  | 593 | 944  | 3.02E-164 | LRR-RLP   | same      |
| At_NGR1b       | RNL       | Chi | CARHR289020 | 61.501 | 413  | 407 | 815  | 8.79E-165 | LRR-RLP   | different |
| At_RLP32       | LRR-RLP   | Chi | CARHR105510 | 69.553 | 358  | 510 | 867  | 3.38E-166 | LRR-RLP   | same      |
| At_RPP13       | CNL       | Chi | CARHR154990 | 68.194 | 371  | 103 | 471  | 1.91E-166 | NBS       | different |
| At_WRR4b       | TNL       | Chi | CARHR047710 | 61.412 | 425  | 5   | 426  | 7.26E-168 | TN        | different |
| At_WRR9        | NL        | Chi | CARHR149280 | 62.899 | 407  | 271 | 673  | 9.40E-170 | NL        | same      |
| At_RPP39       | CNL       | Chi | CARHR052140 | 64.815 | 432  | 447 | 870  | 1.28E-170 | CNL       | same      |
| Bra_Crr1a      | TNL       | Chi | CARHR078370 | 61.663 | 433  | 40  | 468  | 3.30E-171 | TN        | different |
| At_RLM1b       | TNL       | Chi | CARHR047710 | 62.5   | 424  | 5   | 426  | 1.40E-175 | TN        | different |
| At_NGR1a       | RNL       | Chi | CARHR289020 | 64.634 | 410  | 405 | 809  | 1.31E-175 | LRR-RLP   | different |
| At_RLM1a       | TNL       | Chi | CARHR048030 | 61.572 | 458  | 152 | 595  | 6.86E-180 | NBS       | different |
| At_BAK1        | LRR-RLK   | Chi | CARHR241480 | 98.511 | 470  | 146 | 615  | 0         | LRR-RLK   | same      |
| At_WRR12       | TNL       | Chi | CARHR018200 | 87.226 | 1049 | 1   | 1049 | 0         | TNL       | same      |
| At_RLP1        | LRR-RLP   | Chi | CARHR007110 | 86.921 | 734  | 344 | 1077 | 0         | LRR-RLP   | same      |
| At_SOIR1       | LRR-RLK   | Chi | CARHR125590 | 85.959 | 641  | 1   | 641  | 0         | LRR-RLK   | same      |
| At_SOIR1       | LRR-RLK   | Chi | CARHR125590 | 85.959 | 641  | 1   | 641  | 0         | LRR-RLK   | same      |
| At_RFO1        | Other-RLK | Chi | CARHR073440 | 85.563 | 755  | 1   | 751  | 0         | Other-RLK | same      |
| At_RPS4        | TNL       | Chi | CARHR177110 | 84.907 | 1186 | 14  | 1199 | 0         | TNL       | same      |
| At_RPS4        | TNL       | Chi | CARHR177110 | 84.907 | 1186 | 14  | 1199 | 0         | TNL       | same      |
| At_RPS4        | TNL       | Chi | CARHR177110 | 84.907 | 1186 | 14  | 1199 | 0         | TNL       | same      |
| At_RPS5        | TNL       | Chi | CARHR012520 | 83.875 | 893  | 1   | 887  | 0         | CNL       | different |
| At_RPS2        | NL        | Chi | CARHR233600 | 83.736 | 910  | 1   | 909  | 0         | NL        | same      |
| At_BAK1        | LRR-RLK   | Chi | CARHR104720 | 83.191 | 470  | 146 | 615  | 0         | LRR-RLK   | same      |
| At_BAK1        | LRR-RLK   | Chi | CARHR290920 | 80.952 | 483  | 146 | 615  | 0         | LRR-RLK   | same      |
| At_FLS2        | LRR-RLK   | Chi | CARHR175480 | 80.459 | 1177 | 1   | 1173 | 0         | LRR-RLK   | same      |
| At_RLP32       | LRR-RLP   | Chi | CARHR080100 | 80.374 | 856  | 1   | 853  | 0         | LRR-RLP   | same      |
| At_BAK1        | LRR-RLK   | Chi | CARHR290920 | 79.669 | 605  | 24  | 615  | 0         | LRR-RLK   | same      |
| At_RLP32       | LRR-RLP   | Chi | CARHR080100 | 79.517 | 869  | 1   | 866  | 0         | LRR-RLP   | same      |
| Bna_Rlm9/4/7   | Other-RLK | Chi | CARHR016600 | 76.613 | 372  | 378 | 748  | 0         | Other-RLK | same      |
| Bna_Rlm9/4/7   | Other-RLK | Chi | CARHR016600 | 76.613 | 372  | 378 | 748  | 0         | Other-RLK | same      |
| At_RPP2b       | TNL       | Chi | CARHR226300 | 75.376 | 1198 | 1   | 1193 | 0         | TNL       | same      |
| At_RPP2b       | TNL       | Chi | CARHR226300 | 75.376 | 1198 | 1   | 1193 | 0         | TNL       | same      |
| At_RPP2b       | TNL       | Chi | CARHR226300 | 75.376 | 1198 | 1   | 1193 | 0         | TNL       | same      |
| At_RPP2a       | TNL       | Chi | CARHR226300 | 75.356 | 913  | 410 | 1299 | 0         | TNL       | same      |
| At_RFO3        | Other-RLK | Chi | CARHR091190 | 75.348 | 791  | 73  | 850  | 0         | Other-RLK | same      |
| At_RFO3        | Other-RLK | Chi | CARHR091190 | 75.285 | 789  | 73  | 848  | 0         | Other-RLK | same      |
| At_RPP1        | TNL       | Chi | CARHR151520 | 73.675 | 547  | 69  | 613  | 0         | Other-NLR | different |
| At_RPP8        | CNL       | Chi | CARHR183400 | 73.326 | 911  | 1   | 907  | 0         | CNL       | same      |
| At_RPP2b       | TNL       | Chi | CARHR288050 | 73.163 | 980  | 1   | 978  | 0         | TNL       | same      |
| At_RPS4        | TNL       | Chi | CARHR177020 | 72.215 | 763  | 1   | 755  | 0         | Other-NLR | different |
| At_RPP2a       | TNL       | Chi | CARHR288060 | 72.102 | 785  | 516 | 1297 | 0         | TNL       | same      |
| At_RPP2b       | TNL       | Chi | CARHR288050 | 72.05  | 1195 | 1   | 1193 | 0         | TNL       | same      |
| At_RPP2b       | TNL       | Chi | CARHR288050 | 72.05  | 1195 | 1   | 1193 | 0         | TNL       | same      |
| At_RPP8        | CNL       | Chi | CARHR010420 | 72.009 | 468  | 1   | 462  | 0         | CN        | different |
| At_RPP8        | CNL       | Chi | CARHR010420 | 72.009 | 468  | 1   | 462  | 0         | CN        | different |
| At_RPP39       | CNL       | Chi | CARHR052080 | 72.009 | 443  | 1   | 442  | 0         | CN        | different |
| At_RFO1        | Other-RLK | Chi | CARHR016610 | 71.882 | 441  | 282 | 719  | 0         | Other-RLK | same      |
| At_RLM1b       | TNL       | Chi | CARHR149280 | 71.253 | 407  | 267 | 672  | 0         | NL        | different |
| At_RLM1b       | TNL       | Chi | CARHR047100 | 70.851 | 470  | 1   | 470  | 0         | TN        | different |
| At_RLP23       | LRR-RLP   | Chi | CARHR126570 | 70.729 | 878  | 17  | 888  | 0         | LRR-RLP   | same      |
| At_RFO2        | LRR-RLP   | Chi | CARHR261670 | 70.278 | 720  | 30  | 748  | 0         | LRR-RLP   | same      |
| At_NGR1a       | RNL       | Chi | CARHR177840 | 70.213 | 658  | 154 | 806  | 0         | NL        | different |
| At_RLM1b       | TNL       | Chi | CARHR047300 | 69.951 | 1025 | 1   | 1009 | 0         | TNL       | same      |
| At_RFO1        | Other-RLK | Chi | CARHR016600 | 69.577 | 378  | 343 | 717  | 0         | Other-RLK | same      |
| At_RFO1        | Other-RLK | Chi | CARHR016600 | 69.577 | 378  | 343 | 717  | 0         | Other-RLK | same      |
| At_RLM1b       | TNL       | Chi | CARHR047090 | 69.515 | 1030 | 1   | 1013 | 0         | TNL       | same      |
| At_BAK1        | LRR-RLK   | Chi | CARHR033720 | 68.938 | 631  | 23  | 615  | 0         | LRR-RLK   | same      |
| At_RPP2a       | TNL       | Chi | CARHR222470 | 68.932 | 412  | 3   | 414  | 0         | TNL       | same      |
| At_RPP39       | CNL       | Chi | CARHR052100 | 68.898 | 463  | 160 | 616  | 0         | NL        | different |
| At_RLP42       | LRR-RLP   | Chi | CARHR126570 | 68.879 | 874  | 18  | 880  | 0         | LRR-RLP   | same      |

|                |           |     |             |        |      |     |      |   |           |           |
|----------------|-----------|-----|-------------|--------|------|-----|------|---|-----------|-----------|
| At_RPP39       | CNL       | Chi | CARHR052140 | 68.734 | 387  | 1   | 386  | 0 | CNL       | same      |
| At_RFO2        | LRR-RLP   | Chi | CARHR017820 | 68.646 | 724  | 20  | 742  | 0 | LRR-RLP   | same      |
| At_RLM1b       | TNL       | Chi | CARHR047140 | 68.6   | 1000 | 1   | 989  | 0 | TNL       | same      |
| At_RLM1b       | TNL       | Chi | CARHR047120 | 68.416 | 1010 | 1   | 996  | 0 | TNL       | same      |
| Bna_Rlm9/4/7   | Other-RLK | Chi | CARHR062740 | 68.344 | 477  | 125 | 594  | 0 | Other-RLK | same      |
| At_RPP8        | CNL       | Chi | CARHR183370 | 68.287 | 432  | 349 | 775  | 0 | NL        | different |
| At_RPP8        | CNL       | Chi | CARHR011140 | 68.202 | 912  | 1   | 908  | 0 | CNL       | same      |
| At_RLP1        | LRR-RLP   | Chi | CARHR007120 | 68.093 | 514  | 564 | 1071 | 0 | LRR-RLP   | same      |
| At_RLP1        | LRR-RLP   | Chi | CARHR007120 | 68.093 | 514  | 564 | 1071 | 0 | LRR-RLP   | same      |
| At_RLP1        | LRR-RLP   | Chi | CARHR007120 | 68.093 | 514  | 564 | 1071 | 0 | LRR-RLP   | same      |
| At_RLM1b       | TNL       | Chi | CARHR047210 | 67.943 | 836  | 164 | 990  | 0 | NL        | different |
| At_RLP32       | LRR-RLP   | Chi | CARHR085660 | 67.791 | 860  | 1   | 853  | 0 | LRR-RLP   | same      |
| Bna_Rlm9/4/7   | Other-RLK | Chi | CARHR073450 | 67.522 | 779  | 23  | 794  | 0 | Other-RLK | same      |
| At_RLM1b       | TNL       | Chi | CARHR047170 | 67.368 | 570  | 210 | 775  | 0 | NL        | different |
| At_RLP32       | LRR-RLP   | Chi | CARHR105520 | 67.339 | 744  | 113 | 854  | 0 | LRR-RLP   | same      |
| Bju_WRR1       | CNL       | Chi | CARHR010420 | 67.171 | 463  | 1   | 456  | 0 | CN        | different |
| Bju_WRR1       | CNL       | Chi | CARHR010420 | 67.171 | 463  | 1   | 456  | 0 | CN        | different |
| At_RLM1a       | TNL       | Chi | CARHR047100 | 67.164 | 469  | 1   | 469  | 0 | TN        | different |
| At_RPP39       | CNL       | Chi | CARHR051470 | 67.122 | 879  | 1   | 868  | 0 | CNL       | same      |
| At_RLP23       | LRR-RLP   | Chi | CARHR126990 | 67.082 | 723  | 183 | 890  | 0 | LRR-RLP   | same      |
| At_RPP7        | NL        | Chi | CARHR123300 | 67.023 | 561  | 1   | 560  | 0 | NBS       | different |
| At_RPP13       | CNL       | Chi | CARHR154980 | 67.014 | 864  | 1   | 830  | 0 | CNL       | same      |
| At_RPP8        | CNL       | Chi | CARHR290720 | 66.923 | 910  | 1   | 904  | 0 | CNL       | same      |
| At_RPP8        | CNL       | Chi | CARHR290720 | 66.923 | 910  | 1   | 904  | 0 | CNL       | same      |
| At_RLM1a       | TNL       | Chi | CARHR149280 | 66.914 | 405  | 267 | 667  | 0 | NL        | different |
| At_RFO2        | LRR-RLP   | Chi | CARHR065190 | 66.392 | 729  | 13  | 737  | 0 | LRR-RLK   | different |
| At_RFO2        | LRR-RLP   | Chi | CARHR065190 | 66.392 | 729  | 13  | 737  | 0 | LRR-RLK   | different |
| At_RFO1        | Other-RLK | Chi | CARHR016640 | 66.234 | 616  | 25  | 626  | 0 | Other-RLK | same      |
| At_RFO1        | Other-RLK | Chi | CARHR016640 | 66.234 | 616  | 25  | 626  | 0 | Other-RLK | same      |
| At_NGR1b       | RNL       | Chi | CARHR177840 | 66.174 | 677  | 142 | 812  | 0 | NL        | different |
| At_RPP7        | NL        | Chi | CARHR283900 | 66.161 | 461  | 416 | 866  | 0 | NL        | same      |
| At_RPP39       | CNL       | Chi | CARHR051470 | 66.098 | 879  | 1   | 868  | 0 | CNL       | same      |
| At_RPP39       | CNL       | Chi | CARHR052110 | 65.984 | 732  | 146 | 867  | 0 | CNL       | same      |
| At_RPP39       | CNL       | Chi | CARHR052110 | 65.984 | 732  | 146 | 867  | 0 | CNL       | same      |
| At_RPP39       | CNL       | Chi | CARHR052110 | 65.984 | 732  | 146 | 867  | 0 | CNL       | same      |
| At_RPP7        | NL        | Chi | CARHR283900 | 65.939 | 458  | 419 | 866  | 0 | NL        | same      |
| At_RRS1        | TNL       | Chi | CARHR177100 | 65.901 | 1176 | 8   | 1169 | 0 | TNL       | same      |
| At_RPS4        | TNL       | Chi | CARHR177200 | 65.673 | 973  | 158 | 1126 | 0 | NL        | different |
| At_RFO1        | Other-RLK | Chi | CARHR016610 | 65.522 | 728  | 10  | 719  | 0 | Other-RLK | same      |
| At_RPS5        | TNL       | Chi | CARHR013070 | 65.484 | 733  | 1   | 729  | 0 | CNL       | different |
| At_RPS5        | TNL       | Chi | CARHR013070 | 65.484 | 733  | 1   | 729  | 0 | CNL       | different |
| At_RLM1b       | TNL       | Chi | CARHR047080 | 65.43  | 1024 | 1   | 1015 | 0 | TNL       | same      |
| At_RPP7        | NL        | Chi | CARHR284070 | 65.399 | 789  | 5   | 786  | 0 | NL        | same      |
| At_RFO1        | Other-RLK | Chi | CARHR016620 | 65.385 | 754  | 6   | 750  | 0 | Other-RLK | same      |
| At_RPP7        | NL        | Chi | CARHR283760 | 65.32  | 718  | 151 | 866  | 0 | NL        | same      |
| At_RPP7        | NL        | Chi | CARHR283760 | 65.32  | 718  | 151 | 866  | 0 | NL        | same      |
| At_RLP42       | LRR-RLP   | Chi | CARHR126990 | 65.223 | 716  | 183 | 880  | 0 | LRR-RLP   | same      |
| Bol_FocBo1     | TNL       | Chi | CARHR222470 | 65.217 | 713  | 1   | 711  | 0 | TNL       | same      |
| Bna_Rlm9/4/7   | Other-RLK | Chi | CARHR016610 | 65.207 | 434  | 325 | 751  | 0 | Other-RLK | same      |
| At_WRR4b       | TNL       | Chi | CARHR047510 | 65.116 | 430  | 5   | 432  | 0 | TN        | different |
| At_RFO1        | Other-RLK | Chi | CARHR016640 | 65.079 | 756  | 6   | 747  | 0 | Other-RLK | same      |
| At_RPS5        | TNL       | Chi | CARHR012590 | 65.04  | 881  | 1   | 880  | 0 | CNL       | different |
| At_RLM1a       | TNL       | Chi | CARHR047710 | 64.941 | 425  | 4   | 426  | 0 | TN        | different |
| At_RLP23       | LRR-RLP   | Chi | CARHR126970 | 64.854 | 717  | 175 | 889  | 0 | LRR-RLP   | same      |
| Bna_LepR3/Rlm2 | LRR-RLP   | Chi | CARHR105520 | 64.845 | 970  | 1   | 948  | 0 | LRR-RLP   | same      |
| At_WRR8        | TNL       | Chi | CARHR175840 | 64.835 | 546  | 354 | 894  | 0 | NL        | different |
| At_RLP23       | LRR-RLP   | Chi | CARHR127300 | 64.723 | 703  | 182 | 877  | 0 | LRR-RLP   | same      |
| At_WRR8        | TNL       | Chi | CARHR174840 | 64.568 | 1112 | 20  | 1100 | 0 | TNL       | same      |
| At_RLM1a       | TNL       | Chi | CARHR047510 | 64.419 | 430  | 4   | 432  | 0 | TN        | different |
| At_RPP7        | NL        | Chi | CARHR283910 | 64.401 | 868  | 4   | 866  | 0 | CNL       | different |
| At_RPP7        | NL        | Chi | CARHR283910 | 64.401 | 868  | 4   | 866  | 0 | CNL       | different |
| At_RAC1        | TNL       | Chi | CARHR175840 | 64.234 | 548  | 344 | 888  | 0 | NL        | different |
| Bna_Rlm9/4/7   | Other-RLK | Chi | CARHR057010 | 64.122 | 786  | 24  | 794  | 0 | Other-RLK | same      |
| Bra_Crr1a      | TNL       | Chi | CARHR294530 | 64.12  | 432  | 66  | 495  | 0 | TN        | different |
| Bra_Crr1a      | TNL       | Chi | CARHR294530 | 64.12  | 432  | 66  | 495  | 0 | TN        | different |
| Bra_Crr1a      | TNL       | Chi | CARHR294530 | 64.12  | 432  | 66  | 495  | 0 | TN        | different |
| At_WRR4b       | TNL       | Chi | CARHR055030 | 63.957 | 1107 | 4   | 1071 | 0 | TNL       | same      |
| At_RAC1        | TNL       | Chi | CARHR116350 | 63.953 | 430  | 9   | 434  | 0 | TN        | different |
| At_RAC1        | TNL       | Chi | CARHR116350 | 63.953 | 430  | 9   | 434  | 0 | TN        | different |
| At_RLM1a       | TNL       | Chi | CARHR047430 | 63.844 | 614  | 11  | 622  | 0 | TNL       | same      |
| At_RFO1        | Other-RLK | Chi | CARHR016610 | 63.839 | 719  | 10  | 719  | 0 | Other-RLK | same      |
| At_WRR12       | TNL       | Chi | CARHR262010 | 63.681 | 1027 | 11  | 1028 | 0 | TNL       | same      |
| At_RLM1b       | TNL       | Chi | CARHR047510 | 63.636 | 429  | 4   | 431  | 0 | TN        | different |
| At_RLM1b       | TNL       | Chi | CARHR047270 | 63.561 | 848  | 164 | 1003 | 0 | NL        | different |
| At_RRS1        | TNL       | Chi | CARHR177640 | 63.546 | 705  | 473 | 1169 | 0 | TX        | different |
| At_RRS1        | TNL       | Chi | CARHR177640 | 63.546 | 705  | 473 | 1169 | 0 | TX        | different |
| At_RRS1        | TNL       | Chi | CARHR177030 | 63.35  | 1176 | 8   | 1169 | 0 | TNL       | same      |
| At_RLM1b       | TNL       | Chi | CARHR051270 | 63.243 | 993  | 1   | 981  | 0 | TNL       | same      |
| At_RPP7        | NL        | Chi | CARHR284020 | 63.185 | 785  | 89  | 869  | 0 | NL        | same      |
| At_RPP7        | NL        | Chi | CARHR284130 | 63.116 | 873  | 4   | 866  | 0 | CNL       | different |
| At_RPP7        | NL        | Chi | CARHR284130 | 63.116 | 873  | 4   | 866  | 0 | CNL       | different |
| At_RPP7        | NL        | Chi | CARHR284130 | 63.116 | 873  | 4   | 866  | 0 | CNL       | different |
| At_RLP42       | LRR-RLP   | Chi | CARHR126970 | 63.077 | 715  | 182 | 889  | 0 | LRR-RLP   | same      |
| At_RPS4        | TNL       | Chi | CARHR177050 | 63.046 | 985  | 159 | 1132 | 0 | NL        | different |
| At_RPS4        | TNL       | Chi | CARHR177620 | 62.957 | 1150 | 8   | 1139 | 0 | TNL       | same      |
| At_RPS4        | TNL       | Chi | CARHR177620 | 62.957 | 1150 | 8   | 1139 | 0 | TNL       | same      |

|                |           |     |              |        |      |     |      |           |           |           |
|----------------|-----------|-----|--------------|--------|------|-----|------|-----------|-----------|-----------|
| At_WRR4b       | TNL       | Chi | CARHR047430  | 62.945 | 618  | 12  | 626  | 0         | TNL       | same      |
| At_WRR9        | NL        | Chi | CARHR047100  | 62.924 | 472  | 4   | 474  | 0         | TN        | different |
| At_RPP7        | NL        | Chi | CARHR284130  | 62.919 | 836  | 42  | 866  | 0         | CNL       | different |
| At_RPP7        | NL        | Chi | CARHR058170  | 62.874 | 870  | 1   | 866  | 0         | NL        | same      |
| At_RLP42       | LRR-RLP   | Chi | CARHR127300  | 62.787 | 696  | 182 | 871  | 0         | LRR-RLP   | same      |
| At_RLM1b       | TNL       | Chi | CARHR050870  | 62.586 | 1021 | 1   | 999  | 0         | TNL       | same      |
| At_RLP1        | LRR-RLP   | Chi | CARHR006900  | 62.574 | 847  | 223 | 1067 | 0         | LRR-RLP   | same      |
| At_RLM1a       | TNL       | Chi | CARHR047060  | 62.537 | 1009 | 5   | 995  | 0         | NBS       | different |
| At_RLM1a       | TNL       | Chi | CARHR047060  | 62.537 | 1009 | 5   | 995  | 0         | TX        | different |
| At_RLM1a       | TNL       | Chi | CARHR050870  | 62.486 | 909  | 1   | 896  | 0         | TNL       | same      |
| At_ADR1        | NL        | Chi | CARHR208570  | 62.454 | 815  | 6   | 787  | 0         | NL        | same      |
| At_RPP7        | NL        | Chi | CARHR284060  | 62.33  | 884  | 4   | 866  | 0         | CNL       | different |
| At_RAC1        | TNL       | Chi | CARHR174840  | 62.299 | 1122 | 9   | 1109 | 0         | TNL       | same      |
| At_WRR4a       | TNL       | Chi | CARHR055030  | 62.268 | 1023 | 1   | 999  | 0         | TNL       | same      |
| At_RPP8        | CNL       | Chi | CARHR028380  | 62.25  | 551  | 363 | 908  | 0         | CNL       | same      |
| At_RPP8        | CNL       | Chi | CARHR028380  | 62.25  | 551  | 363 | 908  | 0         | NL        | different |
| At_WRR8        | TNL       | Chi | CARHR116350  | 62.15  | 428  | 20  | 442  | 0         | TN        | different |
| At_WRR8        | TNL       | Chi | CARHR116350  | 62.15  | 428  | 20  | 442  | 0         | TN        | different |
| At_WRR9        | NL        | Chi | CARHR047510  | 62.005 | 429  | 9   | 436  | 0         | TN        | different |
| Bra_Crr1a      | TNL       | Chi | CARHR151520  | 61.95  | 523  | 68  | 589  | 0         | Other-NLR | different |
| At_RPP5        | TNL       | Chi | CARHR222470  | 61.898 | 727  | 4   | 715  | 0         | TNL       | same      |
| Bna_LepR3/Rlm2 | LRR-RLP   | Chi | CARHR085660  | 61.835 | 752  | 201 | 950  | 0         | LRR-RLP   | same      |
| At_RPP8        | CNL       | Chi | CARHR028380  | 61.774 | 913  | 1   | 908  | 0         | NL        | different |
| At_RPP8        | CNL       | Chi | CARHR028380  | 61.594 | 828  | 86  | 908  | 0         | NL        | different |
| At_WRR9        | NL        | Chi | CARHR047140  | 61.361 | 999  | 4   | 995  | 0         | TNL       | different |
| At_RLM1b       | TNL       | Chi | CARHR048030  | 61.039 | 462  | 152 | 600  | 0         | NBS       | different |
| At_RPS5        | TNL       | Chi | CARHR012600  | 60.963 | 748  | 139 | 883  | 0         | CNL       | different |
| At_RPS5        | TNL       | Chi | CARHR012600  | 60.963 | 748  | 139 | 883  | 0         | NL        | different |
| At_RLM1b       | TNL       | Chi | CARHR047430  | 60.778 | 617  | 12  | 626  | 0         | TNL       | same      |
| At_RLP30       | LRR-RLP   | Chi | CARHR118040  | 60.633 | 790  | 1   | 781  | 0         | LRR-RLP   | same      |
| At_RLP30       | LRR-RLP   | Chi | CARHR118040  | 60.633 | 790  | 1   | 781  | 0         | LRR-RLP   | same      |
| At_WRR8        | TNL       | Chi | CARHR116330  | 60.598 | 736  | 20  | 745  | 0         | TNL       | same      |
| At_WRR8        | TNL       | Chi | CARHR175060  | 60.488 | 901  | 12  | 891  | 0         | TNL       | same      |
| At_RLM1a       | TNL       | Chi | CARHR047170  | 60.461 | 564  | 210 | 772  | 0         | NL        | different |
| At_RLM1b       | TNL       | Chi | CARHR047060  | 60.405 | 1038 | 5   | 1010 | 0         | TX        | different |
| At_RLM1b       | TNL       | Chi | CARHR047060  | 60.405 | 1038 | 5   | 1010 | 0         | TX        | different |
| At_RLM1a       | TNL       | Chi | CARHR048060  | 60.398 | 553  | 160 | 709  | 0         | NL        | different |
| At_WRR4b       | TNL       | Chi | CARHR047100  | 60.341 | 469  | 1   | 469  | 0         | TN        | different |
| At_RPP4        | TNL       | Chi | CARHR222470  | 60.249 | 722  | 5   | 722  | 0         | TNL       | same      |
| Bra_Crr1a      | TNL       | Chi | CARHR202050  | 60.244 | 737  | 68  | 796  | 0         | NL        | different |
| Bju_WRR1       | CNL       | Chi | CARHR011140  | 60.154 | 911  | 1   | 900  | 0         | CNL       | same      |
| At_RPS4        | TNL       | Chi | CARHR177620  | 60.087 | 1150 | 8   | 1139 | 0         | TNL       | same      |
| At_RAC1        | TNL       | Csa | Csa11g065490 | 68.354 | 158  | 160 | 317  | 1.57E-53  | NL        | different |
| Bna_Rlm9/4/7   | Other-RLK | Csa | Csa14g020270 | 65.882 | 170  | 588 | 757  | 1.52E-54  | Other-RLK | same      |
| At_WRR8        | TNL       | Csa | Csa11g065490 | 68.987 | 158  | 170 | 327  | 8.53E-56  | NL        | different |
| At_RFO2        | LRR-RLP   | Csa | Csa16g034990 | 64.815 | 162  | 576 | 737  | 3.22E-56  | LRR-RLK   | different |
| At_RPS5        | TNL       | Csa | Csa03g016040 | 70.667 | 150  | 140 | 289  | 3.89E-58  | CNL       | different |
| At_ADR1        | NL        | Csa | Csa05g083250 | 61.236 | 178  | 214 | 391  | 2.14E-63  | NBS       | different |
| At_RPP7        | NL        | Csa | Csa05g052490 | 61.878 | 181  | 126 | 306  | 1.26E-64  | NL        | same      |
| At_RPS5        | TNL       | Csa | Csa04404s010 | 64.571 | 175  | 434 | 605  | 1.55E-66  | NL        | different |
| At_RFO1        | Other-RLK | Csa | Csa14g020270 | 72.892 | 166  | 555 | 720  | 1.19E-68  | Other-RLK | same      |
| Bna_Rlm9/4/7   | Other-RLK | Csa | Csa07g058810 | 68.627 | 204  | 594 | 793  | 5.66E-70  | Other-RLK | same      |
| At_RFO1        | Other-RLK | Csa | Csa09g093940 | 66.667 | 183  | 519 | 701  | 3.12E-77  | Other-RLK | same      |
| At_ADR1        | NL        | Csa | Csa16g035790 | 60.952 | 210  | 214 | 423  | 3.08E-79  | NBS       | different |
| At_RPS5        | TNL       | Csa | Csa14g015220 | 60.569 | 246  | 387 | 623  | 4.08E-80  | CNL       | different |
| At_RLP23       | LRR-RLP   | Csa | Csa15g052710 | 73.333 | 195  | 693 | 887  | 5.29E-82  | LRR-RLP   | same      |
| At_RLP23       | LRR-RLP   | Csa | Csa15g052710 | 73.333 | 195  | 693 | 887  | 5.29E-82  | LRR-RLP   | same      |
| At_RPP2b       | TNL       | Csa | Csa12g042110 | 77.439 | 164  | 465 | 628  | 2.04E-86  | NL        | different |
| At_NGR1a       | RNL       | Csa | Csa03087s010 | 71.845 | 206  | 269 | 467  | 8.77E-90  | NBS       | different |
| At_RFO3        | Other-RLK | Csa | Csa11g022890 | 64.815 | 216  | 515 | 730  | 2.26E-91  | Other-RLK | same      |
| At_RPP2a       | TNL       | Csa | Csa10g028540 | 61.569 | 255  | 161 | 414  | 5.04E-93  | NL        | different |
| At_RPP2b       | TNL       | Csa | Csa03866s010 | 73.659 | 205  | 179 | 382  | 4.53E-93  | NBS       | different |
| At_RLP42       | LRR-RLP   | Csa | Csa15g052710 | 79.275 | 193  | 693 | 880  | 2.59E-94  | LRR-RLP   | same      |
| At_RLP42       | LRR-RLP   | Csa | Csa15g052710 | 79.275 | 193  | 693 | 880  | 2.59E-94  | LRR-RLP   | same      |
| Bju_WRR1       | CNL       | Csa | Csa11g050760 | 60.547 | 256  | 1   | 256  | 4.10E-101 | CN        | different |
| Bna_LepR3/Rlm2 | LRR-RLP   | Csa | Csa19g015120 | 63.88  | 299  | 502 | 794  | 1.45E-102 | LRR-RLP   | same      |
| Bna_LepR3/Rlm2 | LRR-RLP   | Csa | Csa19g015120 | 63.88  | 299  | 502 | 794  | 1.45E-102 | LRR-RLP   | same      |
| At_NGR1b       | RNL       | Csa | Csa03087s010 | 81.193 | 218  | 259 | 472  | 2.36E-105 | NBS       | different |
| Bna_Rlm9/4/7   | Other-RLK | Csa | Csa09g093940 | 76.543 | 243  | 552 | 794  | 2.02E-105 | Other-RLK | same      |
| At_RPM1        | NL        | Csa | Csa01g008050 | 60.703 | 313  | 615 | 926  | 1.86E-105 | NL        | same      |
| At_RPP39       | CNL       | Csa | Csa16g055550 | 73.568 | 227  | 403 | 629  | 1.04E-105 | CNL       | same      |
| At_RPP8        | CNL       | Csa | Csa11g050760 | 65.385 | 260  | 1   | 260  | 2.32E-110 | CN        | different |
| At_RPP39       | CNL       | Csa | Csa16g055550 | 76.569 | 239  | 380 | 618  | 1.58E-118 | CNL       | same      |
| At_RAC1        | TNL       | Csa | Csa07g030100 | 63.522 | 318  | 160 | 474  | 8.12E-121 | NL        | different |
| At_RPP39       | CNL       | Csa | Csa17g016520 | 60.355 | 338  | 236 | 568  | 9.97E-125 | CNL       | same      |
| At_RPS5        | TNL       | Csa | Csa17g016100 | 65.449 | 301  | 1   | 299  | 2.11E-126 | NBS       | different |
| At_RLM1a       | TNL       | Csa | Csa11g038780 | 62.046 | 303  | 319 | 621  | 1.53E-126 | NL        | different |
| At_RPP8        | CNL       | Csa | Csa11g074780 | 64.198 | 324  | 585 | 908  | 1.04E-127 | CNL       | same      |
| At_BAK1        | LRR-RLK   | Csa | Csa10g008830 | 99.471 | 189  | 427 | 615  | 2.75E-128 | LRR-RLK   | same      |
| At_RFO1        | Other-RLK | Csa | Csa14g022240 | 65.854 | 287  | 438 | 723  | 1.05E-128 | Other-RLK | same      |
| Bna_Rlm9/4/7   | Other-RLK | Csa | Csa14g022240 | 72.593 | 270  | 469 | 737  | 8.68E-129 | Other-RLK | same      |
| At_RLP32       | LRR-RLP   | Csa | Csa19g015120 | 72.575 | 299  | 415 | 712  | 4.32E-129 | LRR-RLP   | same      |
| At_RLP32       | LRR-RLP   | Csa | Csa19g015120 | 72.575 | 299  | 415 | 712  | 4.32E-129 | LRR-RLP   | same      |
| At_RPP8        | CNL       | Csa | Csa20g041580 | 65.616 | 349  | 562 | 906  | 3.53E-137 | CNL       | same      |
| Bju_WRR1       | CNL       | Csa | Csa10g029780 | 61.862 | 333  | 1   | 333  | 8.34E-140 | CNL       | same      |
| At_RFO1        | Other-RLK | Csa | Csa09g093940 | 87.649 | 251  | 50  | 296  | 3.36E-144 | Other-RLK | same      |

|              |           |     |              |        |      |     |      |           |           |           |
|--------------|-----------|-----|--------------|--------|------|-----|------|-----------|-----------|-----------|
| Bju_WRR1     | CNL       | Csa | Csa03g013720 | 63.636 | 341  | 1   | 336  | 6.39E-146 | CNL       | same      |
| At_NGR1b     | RNL       | Csa | Csa11g104020 | 62.716 | 405  | 415 | 815  | 6.62E-154 | CNL       | different |
| At_RPP8      | CNL       | Csa | Csa10g029780 | 64.723 | 343  | 1   | 343  | 5.31E-155 | CNL       | same      |
| At_WRR12     | TNL       | Csa | Csa03g021400 | 84.588 | 279  | 393 | 652  | 1.51E-156 | LRR-RLP   | different |
| At_WRR12     | TNL       | Csa | Csa03g021400 | 84.588 | 279  | 393 | 652  | 1.51E-156 | LRR-RLP   | different |
| At_NGR1a     | RNL       | Csa | Csa11g104020 | 63.184 | 402  | 413 | 809  | 1.03E-156 | CNL       | different |
| At_RPP1      | TNL       | Csa | Csa09g050290 | 60.879 | 478  | 684 | 1152 | 2.32E-159 | CNL       | different |
| At_RPP8      | CNL       | Csa | Csa03g013720 | 68.915 | 341  | 1   | 341  | 3.99E-165 | CNL       | same      |
| At_RFO1      | Other-RLK | Csa | Csa09g093940 | 62.879 | 396  | 275 | 667  | 2.74E-165 | Other-RLK | same      |
| At_RP55      | TNL       | Csa | Csa14g015130 | 60.584 | 411  | 1   | 411  | 7.41E-168 | CN        | different |
| Bju_WRR1     | CNL       | Csa | Csa20g041580 | 67.196 | 378  | 1   | 372  | 1.44E-169 | CNL       | same      |
| At_RPP13     | CNL       | Csa | Csa06g020520 | 72.022 | 361  | 103 | 460  | 5.44E-170 | NBS       | different |
| At_RLP42     | LRR-RLP   | Csa | Csa05g023540 | 65.116 | 387  | 392 | 777  | 3.86E-171 | LRR-RLP   | same      |
| At_RLP42     | LRR-RLP   | Csa | Csa05g023540 | 65.116 | 387  | 392 | 777  | 3.86E-171 | LRR-RLP   | same      |
| At_RFO1      | Other-RLK | Csa | Csa14g034030 | 61.809 | 398  | 360 | 751  | 1.14E-171 | Other-RLK | same      |
| At_RLP23     | LRR-RLP   | Csa | Csa05g023540 | 65.633 | 387  | 392 | 777  | 1.11E-174 | LRR-RLP   | same      |
| At_RLP23     | LRR-RLP   | Csa | Csa05g023540 | 65.633 | 387  | 392 | 777  | 1.11E-174 | LRR-RLP   | same      |
| At_RP55      | TNL       | Csa | Csa03g016040 | 67.176 | 393  | 1   | 393  | 7.10E-176 | CNL       | different |
| At_BAK1      | LRR-RLK   | Csa | Csa03g038390 | 72.178 | 381  | 9   | 377  | 3.03E-176 | LRR-RLK   | same      |
| At_BAK1      | LRR-RLK   | Csa | Csa12g011400 | 98.699 | 615  | 1   | 615  | 0         | LRR-RLK   | same      |
| At_BAK1      | LRR-RLK   | Csa | Csa11g009710 | 98.699 | 615  | 1   | 615  | 0         | LRR-RLK   | same      |
| At_BAK1      | LRR-RLK   | Csa | Csa11g009710 | 97.276 | 624  | 1   | 615  | 0         | LRR-RLK   | same      |
| At_RFO1      | Other-RLK | Csa | Csa09g093940 | 89.452 | 730  | 29  | 751  | 0         | Other-RLK | same      |
| At_RFO1      | Other-RLK | Csa | Csa16g049330 | 89.373 | 734  | 24  | 751  | 0         | Other-RLK | same      |
| At_FLS2      | LRR-RLK   | Csa | Csa18g003700 | 89.325 | 1171 | 1   | 1168 | 0         | LRR-RLK   | same      |
| At_FLS2      | LRR-RLK   | Csa | Csa11g065650 | 88.682 | 804  | 367 | 1167 | 0         | LRR-RLK   | same      |
| At_RFO2      | LRR-RLP   | Csa | Csa17g022930 | 88.228 | 756  | 1   | 755  | 0         | LRR-RLP   | same      |
| At_RFO2      | LRR-RLP   | Csa | Csa17g022930 | 88.228 | 756  | 1   | 755  | 0         | LRR-RLP   | same      |
| At_ADR1      | NL        | Csa | Csa17g056910 | 88.184 | 457  | 1   | 455  | 0         | NBS       | different |
| At_RPS2      | NL        | Csa | Csa10g016820 | 87.671 | 657  | 253 | 909  | 0         | CNL       | different |
| At_SOBR1     | LRR-RLK   | Csa | Csa07g010930 | 87.072 | 642  | 1   | 641  | 0         | LRR-RLK   | same      |
| At_BAK1      | LRR-RLK   | Csa | Csa12g011400 | 85.547 | 685  | 1   | 615  | 0         | LRR-RLK   | same      |
| At_RLP32     | LRR-RLP   | Csa | Csa01g006540 | 85.434 | 865  | 1   | 860  | 0         | LRR-RLP   | same      |
| At_RLP32     | LRR-RLP   | Csa | Csa01g006540 | 85.434 | 865  | 1   | 860  | 0         | LRR-RLP   | same      |
| At_ADR1      | NL        | Csa | Csa14g043540 | 85.316 | 790  | 1   | 787  | 0         | NL        | same      |
| At_RLP32     | LRR-RLP   | Csa | Csa19g008130 | 85.269 | 835  | 1   | 830  | 0         | LRR-RLP   | same      |
| At_RLP32     | LRR-RLP   | Csa | Csa19g008130 | 85.269 | 835  | 1   | 830  | 0         | LRR-RLP   | same      |
| At_RLP32     | LRR-RLP   | Csa | Csa15g007010 | 85.047 | 856  | 1   | 852  | 0         | LRR-RLP   | same      |
| At_RLP32     | LRR-RLP   | Csa | Csa15g007010 | 85.047 | 856  | 1   | 852  | 0         | LRR-RLP   | same      |
| At_BAK1      | LRR-RLK   | Csa | Csa10g008830 | 83.56  | 663  | 1   | 612  | 0         | LRR-RLK   | same      |
| At_FLS2      | LRR-RLK   | Csa | Csa20g079470 | 83.543 | 1112 | 73  | 1167 | 0         | LRR-RLK   | same      |
| At_RPS2      | NL        | Csa | Csa11g018310 | 82.513 | 955  | 1   | 909  | 0         | CNL       | different |
| At_RPS2      | NL        | Csa | Csa10g016820 | 81.893 | 486  | 1   | 480  | 0         | CNL       | different |
| At_BAK1      | LRR-RLK   | Csa | Csa15g064420 | 81.728 | 602  | 17  | 615  | 0         | LRR-RLK   | same      |
| At_RPP8      | CNL       | Csa | Csa20g041580 | 81.627 | 381  | 1   | 380  | 0         | CNL       | same      |
| At_RLP30     | LRR-RLP   | Csa | Csa19g007700 | 81.599 | 788  | 1   | 786  | 0         | LRR-RLP   | same      |
| At_RLP30     | LRR-RLP   | Csa | Csa19g007700 | 81.599 | 788  | 1   | 786  | 0         | LRR-RLP   | same      |
| At_RLP30     | LRR-RLP   | Csa | Csa15g006630 | 79.716 | 774  | 16  | 786  | 0         | LRR-RLP   | same      |
| At_RLP30     | LRR-RLP   | Csa | Csa15g006630 | 79.716 | 774  | 16  | 786  | 0         | LRR-RLP   | same      |
| At_RPP13     | CNL       | Csa | Csa09g042600 | 79.636 | 604  | 1   | 592  | 0         | NBS       | different |
| At_NGR1b     | RNL       | Csa | Csa18g040610 | 79.63  | 756  | 5   | 753  | 0         | NL        | different |
| At_BAK1      | LRR-RLK   | Csa | Csa07g038730 | 79.504 | 605  | 24  | 615  | 0         | LRR-RLK   | same      |
| At_BAK1      | LRR-RLK   | Csa | Csa09g075150 | 79.504 | 605  | 24  | 615  | 0         | LRR-RLK   | same      |
| At_BAK1      | LRR-RLK   | Csa | Csa16g034450 | 79.504 | 605  | 24  | 615  | 0         | LRR-RLK   | same      |
| At_RLP42     | LRR-RLP   | Csa | Csa01g031010 | 79.274 | 854  | 17  | 869  | 0         | LRR-RLP   | same      |
| At_RLP42     | LRR-RLP   | Csa | Csa01g031010 | 79.274 | 854  | 17  | 869  | 0         | LRR-RLP   | same      |
| At_RLP42     | LRR-RLP   | Csa | Csa19g036840 | 78.463 | 859  | 25  | 880  | 0         | LRR-RLP   | same      |
| At_RLP42     | LRR-RLP   | Csa | Csa19g036840 | 78.463 | 859  | 25  | 880  | 0         | LRR-RLP   | same      |
| At_WRR12     | TNL       | Csa | Csa03g021400 | 78.365 | 587  | 463 | 1048 | 0         | LRR-RLP   | different |
| At_WRR12     | TNL       | Csa | Csa03g021400 | 78.365 | 587  | 463 | 1048 | 0         | LRR-RLP   | different |
| At_RFO1      | Other-RLK | Csa | Csa07g058810 | 78.31  | 710  | 50  | 751  | 0         | Other-RLK | same      |
| At_WRR12     | TNL       | Csa | Csa14g021890 | 78.174 | 701  | 355 | 1035 | 0         | NL        | different |
| At_RPP39     | CNL       | Csa | Csa09g095740 | 77.914 | 326  | 1   | 326  | 0         | CN        | different |
| Bna_Rlm9/4/7 | Other-RLK | Csa | Csa09g093940 | 77.859 | 411  | 286 | 693  | 0         | Other-RLK | same      |
| At_RPP8      | CNL       | Csa | Csa18g014750 | 77.79  | 914  | 1   | 906  | 0         | CNL       | same      |
| At_NGR1b     | RNL       | Csa | Csa11g104020 | 77.119 | 826  | 5   | 790  | 0         | CNL       | different |
| At_BAK1      | LRR-RLK   | Csa | Csa17g059530 | 76.414 | 619  | 9   | 615  | 0         | LRR-RLK   | same      |
| At_RLP30     | LRR-RLP   | Csa | Csa01g006210 | 74.968 | 783  | 1   | 782  | 0         | LRR-RLP   | same      |
| At_RLP30     | LRR-RLP   | Csa | Csa01g006210 | 74.968 | 783  | 1   | 782  | 0         | LRR-RLP   | same      |
| At_RPP8      | CNL       | Csa | Csa11g074780 | 74.73  | 463  | 1   | 462  | 0         | CNL       | same      |
| At_RPP39     | CNL       | Csa | Csa16g053080 | 74.706 | 340  | 1   | 340  | 0         | CN        | different |
| At_WRR4b     | TNL       | Csa | Csa07g026440 | 74.641 | 765  | 315 | 1073 | 0         | NL        | different |
| At_RFO1      | Other-RLK | Csa | Csa07g058680 | 74.006 | 704  | 55  | 751  | 0         | Other-RLK | same      |
| At_RFO3      | Other-RLK | Csa | Csa19g022860 | 73.767 | 892  | 1   | 850  | 0         | Other-RLK | same      |
| At_RFO3      | Other-RLK | Csa | Csa15g020770 | 73.359 | 777  | 19  | 773  | 0         | Other-RLK | same      |
| At_RPP39     | CNL       | Csa | Csa07g062500 | 73.273 | 550  | 1   | 548  | 0         | CNL       | same      |
| At_RPP39     | CNL       | Csa | Csa07g062500 | 73.273 | 550  | 1   | 548  | 0         | CNL       | same      |
| At_WRR4b     | TNL       | Csa | Csa17g098890 | 73.038 | 586  | 494 | 1072 | 0         | LRR-RLP   | different |
| At_WRR4b     | TNL       | Csa | Csa17g098890 | 73.038 | 586  | 494 | 1072 | 0         | LRR-RLP   | different |
| At_RFO3      | Other-RLK | Csa | Csa05g081570 | 72.306 | 863  | 1   | 850  | 0         | Other-RLK | same      |
| At_RFO2      | LRR-RLP   | Csa | Csa07g039390 | 72.131 | 549  | 189 | 737  | 0         | LRR-RLK   | different |
| At_RFO2      | LRR-RLP   | Csa | Csa14g021470 | 72.043 | 744  | 6   | 749  | 0         | LRR-RLP   | same      |
| At_RFO2      | LRR-RLP   | Csa | Csa14g021470 | 72.043 | 744  | 6   | 749  | 0         | LRR-RLP   | same      |
| At_RFO2      | LRR-RLP   | Csa | Csa16g034990 | 72.029 | 690  | 48  | 737  | 0         | LRR-RLK   | different |
| Bna_Rlm9/4/7 | Other-RLK | Csa | Csa01g034720 | 71.681 | 791  | 22  | 794  | 0         | Other-RLK | same      |
| At_RPP13     | CNL       | Csa | Csa06g020300 | 71.678 | 858  | 1   | 834  | 0         | NL        | different |

|                |           |     |              |        |     |     |     |   |           |           |
|----------------|-----------|-----|--------------|--------|-----|-----|-----|---|-----------|-----------|
| Bna_Rlm9/4/7   | Other-RLK | Csa | Csa19g050880 | 71.648 | 783 | 22  | 794 | 0 | Other-RLK | same      |
| At_RPP39       | CNL       | Csa | Csa09g095770 | 71.361 | 845 | 42  | 871 | 0 | CNL       | same      |
| At_RPP39       | CNL       | Csa | Csa07g062500 | 71.268 | 891 | 1   | 871 | 0 | CNL       | same      |
| At_BAK1        | LRR-RLK   | Csa | Csa14g044100 | 71.254 | 574 | 97  | 615 | 0 | LRR-RLK   | same      |
| At_RPP39       | CNL       | Csa | Csa07g062500 | 71.124 | 890 | 1   | 871 | 0 | CNL       | same      |
| At_RPP39       | CNL       | Csa | Csa07g062500 | 71.124 | 890 | 1   | 871 | 0 | CNL       | same      |
| At_RFO3        | Other-RLK | Csa | Csa16g027360 | 71.101 | 872 | 1   | 850 | 0 | Other-RLK | same      |
| At_RLP32       | LRR-RLP   | Csa | Csa19g013610 | 70.952 | 630 | 228 | 854 | 0 | LRR-RLP   | same      |
| At_RLP32       | LRR-RLP   | Csa | Csa19g013610 | 70.952 | 630 | 228 | 854 | 0 | LRR-RLP   | same      |
| At_RPP8        | CNL       | Csa | Csa14g013640 | 70.46  | 914 | 1   | 908 | 0 | CNL       | same      |
| At_RPP8        | CNL       | Csa | Csa17g093690 | 70.273 | 915 | 1   | 906 | 0 | CNL       | same      |
| At_RPP39       | CNL       | Csa | Csa07g062360 | 70.056 | 885 | 1   | 870 | 0 | CNL       | same      |
| At_NGR1a       | RNL       | Csa | Csa18g040610 | 70.039 | 761 | 1   | 747 | 0 | NL        | different |
| At_RPP39       | CNL       | Csa | Csa09g095730 | 70.034 | 881 | 1   | 871 | 0 | CNL       | same      |
| At_RPP8        | CNL       | Csa | Csa12g074470 | 69.934 | 908 | 1   | 905 | 0 | CNL       | same      |
| At_RFO2        | LRR-RLP   | Csa | Csa09g075890 | 69.783 | 738 | 1   | 737 | 0 | LRR-RLK   | different |
| Bna_Rlm9/4/7   | Other-RLK | Csa | Csa07g036470 | 69.466 | 786 | 22  | 794 | 0 | Other-RLK | same      |
| At_RFO2        | LRR-RLP   | Csa | Csa03g021020 | 69.231 | 741 | 1   | 740 | 0 | LRR-RLP   | same      |
| At_RFO2        | LRR-RLP   | Csa | Csa03g021020 | 69.231 | 741 | 1   | 740 | 0 | LRR-RLP   | same      |
| At_RPP39       | CNL       | Csa | Csa07g062520 | 69.221 | 809 | 81  | 877 | 0 | NL        | different |
| At_RLP23       | LRR-RLP   | Csa | Csa05g024050 | 68.899 | 881 | 17  | 890 | 0 | LRR-RLP   | same      |
| At_RLP23       | LRR-RLP   | Csa | Csa05g024050 | 68.899 | 881 | 17  | 890 | 0 | LRR-RLP   | same      |
| At_RPP39       | CNL       | Csa | Csa09g095890 | 68.787 | 849 | 42  | 877 | 0 | CNL       | same      |
| At_RLM3        | TN        | Csa | Csa12g049800 | 68.736 | 435 | 155 | 548 | 0 | NBS       | different |
| At_RPP13       | CNL       | Csa | Csa09g043970 | 68.458 | 856 | 1   | 834 | 0 | NL        | different |
| At_NGR1a       | RNL       | Csa | Csa11g104020 | 68.231 | 831 | 1   | 784 | 0 | CNL       | different |
| At_RPP39       | CNL       | Csa | Csa07g062370 | 68.182 | 462 | 424 | 871 | 0 | LRR-RLP   | different |
| At_RPP39       | CNL       | Csa | Csa07g062370 | 68.182 | 462 | 424 | 871 | 0 | LRR-RLP   | different |
| Bna_Rlm9/4/7   | Other-RLK | Csa | Csa16g031260 | 68.164 | 757 | 50  | 794 | 0 | Other-RLK | same      |
| At_RFO2        | LRR-RLP   | Csa | Csa17g022950 | 68.151 | 741 | 1   | 740 | 0 | LRR-RLP   | same      |
| At_RFO2        | LRR-RLP   | Csa | Csa17g022950 | 68.151 | 741 | 1   | 740 | 0 | LRR-RLP   | same      |
| Bna_LepR3/Rlm2 | LRR-RLP   | Csa | Csa19g046270 | 67.886 | 629 | 323 | 947 | 0 | LRR-RLP   | same      |
| Bna_LepR3/Rlm2 | LRR-RLP   | Csa | Csa19g046270 | 67.886 | 629 | 323 | 947 | 0 | LRR-RLP   | same      |
| At_RLP23       | LRR-RLP   | Csa | Csa01g031010 | 67.87  | 859 | 18  | 875 | 0 | LRR-RLP   | same      |
| At_RLP23       | LRR-RLP   | Csa | Csa01g031010 | 67.87  | 859 | 18  | 875 | 0 | LRR-RLP   | same      |
| At_RPP7        | NL        | Csa | Csa05g052240 | 67.727 | 880 | 1   | 866 | 0 | NL        | same      |
| At_RLP23       | LRR-RLP   | Csa | Csa05g024010 | 67.698 | 808 | 84  | 890 | 0 | LRR-RLP   | same      |
| At_RLP23       | LRR-RLP   | Csa | Csa05g024010 | 67.698 | 808 | 84  | 890 | 0 | LRR-RLP   | same      |
| Bna_Rlm9/4/7   | Other-RLK | Csa | Csa07g058810 | 67.643 | 683 | 24  | 699 | 0 | Other-RLK | same      |
| At_RLP23       | LRR-RLP   | Csa | Csa19g036840 | 67.552 | 866 | 25  | 887 | 0 | LRR-RLP   | same      |
| At_RLP23       | LRR-RLP   | Csa | Csa19g036840 | 67.552 | 866 | 25  | 887 | 0 | LRR-RLP   | same      |
| At_RLP32       | LRR-RLP   | Csa | Csa19g046270 | 67.528 | 619 | 234 | 852 | 0 | LRR-RLP   | same      |
| At_RLP32       | LRR-RLP   | Csa | Csa19g046270 | 67.528 | 619 | 234 | 852 | 0 | LRR-RLP   | same      |
| At_RLP42       | LRR-RLP   | Csa | Csa05g024050 | 67.506 | 874 | 18  | 880 | 0 | LRR-RLP   | same      |
| At_RLP42       | LRR-RLP   | Csa | Csa05g024050 | 67.506 | 874 | 18  | 880 | 0 | LRR-RLP   | same      |
| At_RPP8        | CNL       | Csa | Csa03g060600 | 66.914 | 674 | 1   | 668 | 0 | CNL       | same      |
| At_RPP39       | CNL       | Csa | Csa16g053190 | 66.894 | 879 | 1   | 869 | 0 | CNL       | same      |
| At_RLP32       | LRR-RLP   | Csa | Csa19g008130 | 66.822 | 859 | 29  | 860 | 0 | LRR-RLP   | same      |
| At_RLP32       | LRR-RLP   | Csa | Csa19g008130 | 66.822 | 859 | 29  | 860 | 0 | LRR-RLP   | same      |
| At_RFO1        | Other-RLK | Csa | Csa03g019890 | 66.809 | 705 | 5   | 699 | 0 | Other-RLK | same      |
| At_RPS5        | TNL       | Csa | Csa14g015220 | 66.757 | 737 | 1   | 736 | 0 | CNL       | different |
| At_BAK1        | LRR-RLK   | Csa | Csa19g043470 | 66.729 | 538 | 17  | 549 | 0 | LRR-RLK   | same      |
| At_BAK1        | LRR-RLK   | Csa | Csa19g043470 | 66.729 | 538 | 17  | 549 | 0 | LRR-RLK   | same      |
| At_RLP32       | LRR-RLP   | Csa | Csa15g007010 | 66.525 | 708 | 66  | 748 | 0 | LRR-RLP   | same      |
| At_RLP32       | LRR-RLP   | Csa | Csa15g007010 | 66.525 | 708 | 66  | 748 | 0 | LRR-RLP   | same      |
| Bna_Rlm9/4/7   | Other-RLK | Csa | Csa14g034030 | 66.514 | 436 | 359 | 793 | 0 | Other-RLK | same      |
| At_RFO1        | Other-RLK | Csa | Csa17g021700 | 66.243 | 708 | 13  | 704 | 0 | Other-RLK | same      |
| At_RPP8        | CNL       | Csa | Csa14g063890 | 65.939 | 916 | 1   | 906 | 0 | CNL       | same      |
| At_RPS5        | TNL       | Csa | Csa17g016500 | 65.876 | 885 | 1   | 884 | 0 | CNL       | different |
| At_RFO1        | Other-RLK | Csa | Csa17g021720 | 65.869 | 627 | 133 | 747 | 0 | Other-RLK | same      |
| At_RPP39       | CNL       | Csa | Csa09g095760 | 65.847 | 691 | 1   | 683 | 0 | CNL       | same      |
| At_RPP39       | CNL       | Csa | Csa09g095750 | 65.798 | 883 | 1   | 873 | 0 | CNL       | same      |
| At_RLP32       | LRR-RLP   | Csa | Csa15g014680 | 65.783 | 868 | 1   | 854 | 0 | LRR-RLP   | same      |
| At_RLP32       | LRR-RLP   | Csa | Csa15g014680 | 65.783 | 868 | 1   | 854 | 0 | LRR-RLP   | same      |
| At_RPP39       | CNL       | Csa | Csa16g055540 | 65.684 | 848 | 1   | 821 | 0 | CNL       | same      |
| At_RLP32       | LRR-RLP   | Csa | Csa19g014830 | 65.471 | 892 | 1   | 854 | 0 | LRR-RLP   | same      |
| At_RLP32       | LRR-RLP   | Csa | Csa19g014830 | 65.471 | 892 | 1   | 854 | 0 | LRR-RLP   | same      |
| At_RPS5        | TNL       | Csa | Csa10g031910 | 65.471 | 892 | 1   | 883 | 0 | NL        | different |
| At_RFO1        | Other-RLK | Csa | Csa03g019890 | 65.444 | 709 | 10  | 699 | 0 | Other-RLK | same      |
| At_RLP23       | LRR-RLP   | Csa | Csa07g008160 | 65.438 | 868 | 22  | 883 | 0 | LRR-RLP   | same      |
| At_RLP23       | LRR-RLP   | Csa | Csa07g008160 | 65.438 | 868 | 22  | 883 | 0 | LRR-RLP   | same      |
| At_RLP32       | LRR-RLP   | Csa | Csa15g014440 | 65.389 | 835 | 38  | 830 | 0 | LRR-RLP   | same      |
| At_RLP32       | LRR-RLP   | Csa | Csa15g014440 | 65.389 | 835 | 38  | 830 | 0 | LRR-RLP   | same      |
| At_RLP32       | LRR-RLP   | Csa | Csa19g015110 | 65.264 | 832 | 80  | 854 | 0 | LRR-RLP   | same      |
| At_RLP32       | LRR-RLP   | Csa | Csa19g015110 | 65.264 | 832 | 80  | 854 | 0 | LRR-RLP   | same      |
| At_FLS2        | LRR-RLK   | Csa | Csa20g079470 | 65.256 | 780 | 24  | 764 | 0 | LRR-RLK   | same      |
| At_RFO1        | Other-RLK | Csa | Csa17g021700 | 65.158 | 729 | 10  | 718 | 0 | Other-RLK | same      |
| At_RFO1        | Other-RLK | Csa | Csa14g020260 | 65.154 | 749 | 18  | 751 | 0 | Other-RLK | same      |
| Bna_Rlm9/4/7   | Other-RLK | Csa | Csa05g087560 | 65.071 | 773 | 41  | 794 | 0 | Other-RLK | same      |
| At_RLP23       | LRR-RLP   | Csa | Csa16g008260 | 64.854 | 717 | 175 | 889 | 0 | LRR-RLP   | same      |
| At_RLP23       | LRR-RLP   | Csa | Csa16g008260 | 64.854 | 717 | 175 | 889 | 0 | LRR-RLP   | same      |
| At_RPP8        | CNL       | Csa | Csa03g013720 | 64.73  | 482 | 431 | 907 | 0 | CNL       | same      |
| At_RLP23       | LRR-RLP   | Csa | Csa16g008000 | 64.673 | 719 | 175 | 888 | 0 | LRR-RLP   | same      |
| At_RLP23       | LRR-RLP   | Csa | Csa16g008000 | 64.673 | 719 | 175 | 888 | 0 | LRR-RLP   | same      |
| At_RPP13       | CNL       | Csa | Csa04g029590 | 64.596 | 853 | 1   | 834 | 0 | NL        | different |
| At_RLP32       | LRR-RLP   | Csa | Csa15g014660 | 64.567 | 889 | 1   | 854 | 0 | LRR-RLP   | same      |

|                |           |     |              |        |      |     |      |   |           |           |
|----------------|-----------|-----|--------------|--------|------|-----|------|---|-----------|-----------|
| At_RLP32       | LRR-RLP   | Csa | Csa15g014660 | 64.567 | 889  | 1   | 854  | 0 | LRR-RLP   | same      |
| At_RPP8        | CNL       | Csa | Csa12g053350 | 64.466 | 909  | 1   | 904  | 0 | CNL       | same      |
| Bna_LepR3/Rlm2 | LRR-RLP   | Csa | Csa19g013610 | 64.275 | 641  | 317 | 947  | 0 | LRR-RLP   | same      |
| Bna_LepR3/Rlm2 | LRR-RLP   | Csa | Csa19g013610 | 64.275 | 641  | 317 | 947  | 0 | LRR-RLP   | same      |
| At_RLP32       | LRR-RLP   | Csa | Csa19g015030 | 64.27  | 890  | 1   | 854  | 0 | LRR-RLP   | same      |
| At_RLP32       | LRR-RLP   | Csa | Csa19g015030 | 64.27  | 890  | 1   | 854  | 0 | LRR-RLP   | same      |
| At_RLP32       | LRR-RLP   | Csa | Csa19g014850 | 64.267 | 778  | 114 | 853  | 0 | LRR-RLP   | same      |
| At_RLP32       | LRR-RLP   | Csa | Csa19g014850 | 64.267 | 778  | 114 | 853  | 0 | LRR-RLP   | same      |
| At_RLP32       | LRR-RLP   | Csa | Csa01g012020 | 64.123 | 878  | 29  | 846  | 0 | LRR-RLP   | same      |
| At_RLP32       | LRR-RLP   | Csa | Csa01g012020 | 64.123 | 878  | 29  | 846  | 0 | LRR-RLP   | same      |
| At_RLP23       | LRR-RLP   | Csa | Csa05g023150 | 64.078 | 721  | 175 | 888  | 0 | LRR-RLP   | same      |
| At_RLP23       | LRR-RLP   | Csa | Csa05g023150 | 64.078 | 721  | 175 | 888  | 0 | LRR-RLP   | same      |
| At_RLP23       | LRR-RLP   | Csa | Csa05g023150 | 64.078 | 721  | 175 | 888  | 0 | LRR-RLP   | same      |
| At_RLP23       | LRR-RLP   | Csa | Csa05g023150 | 64.078 | 721  | 175 | 888  | 0 | LRR-RLP   | same      |
| At_RFO1        | Other-RLK | Csa | Csa03g019890 | 64.058 | 754  | 10  | 751  | 0 | Other-RLK | same      |
| Bna_MPK9       | Other-RLK | Csa | Csa09g002650 | 63.91  | 532  | 100 | 564  | 0 | Other-RLK | same      |
| At_RFO1        | Other-RLK | Csa | Csa14g020250 | 63.821 | 738  | 5   | 721  | 0 | Other-RLK | same      |
| At_RFO1        | Other-RLK | Csa | Csa17g021720 | 63.525 | 732  | 12  | 720  | 0 | Other-RLK | same      |
| At_RLP32       | LRR-RLP   | Csa | Csa15g014440 | 63.474 | 783  | 55  | 832  | 0 | LRR-RLP   | same      |
| At_RLP32       | LRR-RLP   | Csa | Csa15g014440 | 63.474 | 783  | 55  | 832  | 0 | LRR-RLP   | same      |
| At_RPP7        | NL        | Csa | Csa16g018240 | 63.314 | 875  | 1   | 869  | 0 | NL        | same      |
| At_RPP8        | CNL       | Csa | Csa03g014560 | 63.293 | 741  | 27  | 761  | 0 | CNL       | same      |
| At_RRS1        | TNL       | Csa | Csa11g068440 | 63.246 | 1189 | 6   | 1158 | 0 | NL        | different |
| Bna_LepR3/Rlm2 | LRR-RLP   | Csa | Csa15g007010 | 63.194 | 739  | 204 | 937  | 0 | LRR-RLP   | same      |
| Bna_LepR3/Rlm2 | LRR-RLP   | Csa | Csa15g007010 | 63.194 | 739  | 204 | 937  | 0 | LRR-RLP   | same      |
| At_RFO1        | Other-RLK | Csa | Csa14g020240 | 63.172 | 763  | 1   | 741  | 0 | Other-RLK | same      |
| At_RLP42       | LRR-RLP   | Csa | Csa16g008000 | 63.083 | 707  | 182 | 880  | 0 | LRR-RLP   | same      |
| At_RLP42       | LRR-RLP   | Csa | Csa16g008000 | 63.083 | 707  | 182 | 880  | 0 | LRR-RLP   | same      |
| Bna_LepR3/Rlm2 | LRR-RLP   | Csa | Csa01g006540 | 63.017 | 749  | 204 | 942  | 0 | LRR-RLP   | same      |
| Bna_LepR3/Rlm2 | LRR-RLP   | Csa | Csa01g006540 | 63.017 | 749  | 204 | 942  | 0 | LRR-RLP   | same      |
| At_RLP42       | LRR-RLP   | Csa | Csa07g008160 | 62.993 | 862  | 22  | 876  | 0 | LRR-RLP   | same      |
| At_RLP42       | LRR-RLP   | Csa | Csa07g008160 | 62.993 | 862  | 22  | 876  | 0 | LRR-RLP   | same      |
| At_RPP7        | NL        | Csa | Csa05g052410 | 62.916 | 782  | 1   | 776  | 0 | NL        | same      |
| At_RPP8        | CNL       | Csa | Csa03g060600 | 62.867 | 579  | 335 | 908  | 0 | CNL       | same      |
| Bna_LepR3/Rlm2 | LRR-RLP   | Csa | Csa15g007010 | 62.84  | 662  | 176 | 831  | 0 | LRR-RLP   | same      |
| Bna_LepR3/Rlm2 | LRR-RLP   | Csa | Csa15g007010 | 62.84  | 662  | 176 | 831  | 0 | LRR-RLP   | same      |
| At_ADR1        | NL        | Csa | Csa20g005920 | 62.822 | 815  | 6   | 787  | 0 | CNL       | different |
| At_RLP42       | LRR-RLP   | Csa | Csa05g023150 | 62.764 | 709  | 182 | 880  | 0 | LRR-RLP   | same      |
| At_RLP42       | LRR-RLP   | Csa | Csa05g023150 | 62.764 | 709  | 182 | 880  | 0 | LRR-RLP   | same      |
| At_RLP42       | LRR-RLP   | Csa | Csa05g023150 | 62.764 | 709  | 182 | 880  | 0 | LRR-RLP   | same      |
| At_RLP42       | LRR-RLP   | Csa | Csa05g023150 | 62.764 | 709  | 182 | 880  | 0 | LRR-RLP   | same      |
| Bna_LepR3/Rlm2 | LRR-RLP   | Csa | Csa19g008130 | 62.743 | 773  | 176 | 942  | 0 | LRR-RLP   | same      |
| Bna_LepR3/Rlm2 | LRR-RLP   | Csa | Csa19g008130 | 62.743 | 773  | 176 | 942  | 0 | LRR-RLP   | same      |
| At_WRR12       | TNL       | Csa | Csa12g079810 | 62.736 | 636  | 347 | 981  | 0 | NL        | different |
| At_RLP42       | LRR-RLP   | Csa | Csa16g008260 | 62.674 | 718  | 182 | 889  | 0 | LRR-RLP   | same      |
| At_RLP42       | LRR-RLP   | Csa | Csa16g008260 | 62.674 | 718  | 182 | 889  | 0 | LRR-RLP   | same      |
| At_WRR12       | TNL       | Csa | Csa14g021930 | 62.637 | 637  | 374 | 1010 | 0 | NL        | different |
| Bju_WRR1       | CNL       | Csa | Csa17g093690 | 62.623 | 915  | 1   | 900  | 0 | CNL       | same      |
| At_RLP32       | LRR-RLP   | Csa | Csa01g012100 | 62.613 | 888  | 1   | 846  | 0 | LRR-RLP   | same      |
| At_RLP32       | LRR-RLP   | Csa | Csa01g012100 | 62.613 | 888  | 1   | 846  | 0 | LRR-RLP   | same      |
| At_ADR1        | NL        | Csa | Csa08g059780 | 62.546 | 817  | 6   | 787  | 0 | CNL       | different |
| Bna_LepR3/Rlm2 | LRR-RLP   | Csa | Csa19g008130 | 62.327 | 722  | 204 | 915  | 0 | LRR-RLP   | same      |
| Bna_LepR3/Rlm2 | LRR-RLP   | Csa | Csa19g008130 | 62.327 | 722  | 204 | 915  | 0 | LRR-RLP   | same      |
| At_RPP13       | CNL       | Csa | Csa09g043950 | 62.284 | 867  | 1   | 830  | 0 | CNL       | same      |
| At_RPS5        | TNL       | Csa | Csa17g016520 | 62.116 | 879  | 1   | 874  | 0 | CNL       | different |
| At_RLP32       | LRR-RLP   | Csa | Csa19g014810 | 62.099 | 934  | 1   | 868  | 0 | LRR-RLP   | same      |
| At_RLP32       | LRR-RLP   | Csa | Csa19g014810 | 62.099 | 934  | 1   | 868  | 0 | LRR-RLP   | same      |
| At_RLP32       | LRR-RLP   | Csa | Csa19g014880 | 62.09  | 823  | 1   | 765  | 0 | LRR-RLP   | same      |
| At_RLP32       | LRR-RLP   | Csa | Csa19g014880 | 62.09  | 823  | 1   | 765  | 0 | LRR-RLP   | same      |
| At_RLM1b       | TNL       | Csa | Csa07g063320 | 62.061 | 883  | 161 | 998  | 0 | NL        | different |
| At_RPS5        | TNL       | Csa | Csa17g016520 | 62.027 | 582  | 308 | 883  | 0 | CNL       | different |
| At_ADR1        | NL        | Csa | Csa13g006680 | 61.74  | 724  | 6   | 695  | 0 | CNL       | different |
| Bna_LepR3/Rlm2 | LRR-RLP   | Csa | Csa15g014440 | 61.73  | 763  | 176 | 921  | 0 | LRR-RLP   | same      |
| Bna_LepR3/Rlm2 | LRR-RLP   | Csa | Csa15g014440 | 61.73  | 763  | 176 | 921  | 0 | LRR-RLP   | same      |
| Bju_WRR1       | CNL       | Csa | Csa12g074470 | 61.648 | 910  | 1   | 900  | 0 | CNL       | same      |
| Bna_LepR3/Rlm2 | LRR-RLP   | Csa | Csa15g014680 | 61.598 | 776  | 187 | 950  | 0 | LRR-RLP   | same      |
| Bna_LepR3/Rlm2 | LRR-RLP   | Csa | Csa15g014680 | 61.598 | 776  | 187 | 950  | 0 | LRR-RLP   | same      |
| Bju_WRR1       | CNL       | Csa | Csa03g060600 | 61.573 | 674  | 1   | 667  | 0 | CNL       | same      |
| At_RLP32       | LRR-RLP   | Csa | Csa19g015120 | 61.555 | 926  | 34  | 853  | 0 | LRR-RLP   | same      |
| At_RLP32       | LRR-RLP   | Csa | Csa19g015120 | 61.555 | 926  | 34  | 853  | 0 | LRR-RLP   | same      |
| At_RFO1        | Other-RLK | Csa | Csa03g019890 | 61.528 | 707  | 35  | 725  | 0 | Other-RLK | same      |
| Bju_WRR1       | CNL       | Csa | Csa18g014750 | 61.379 | 914  | 1   | 900  | 0 | CNL       | same      |
| At_RLP32       | LRR-RLP   | Csa | Csa19g015010 | 61.148 | 610  | 252 | 852  | 0 | LRR-RLP   | same      |
| At_RLP32       | LRR-RLP   | Csa | Csa19g015010 | 61.148 | 610  | 252 | 852  | 0 | LRR-RLP   | same      |
| Bna_Rlm9/4/7   | Other-RLK | Csa | Csa03g019890 | 60.676 | 740  | 22  | 748  | 0 | Other-RLK | same      |
| Bju_WRR1       | CNL       | Csa | Csa14g013640 | 60.593 | 911  | 1   | 900  | 0 | CNL       | same      |
| At_RPS5        | TNL       | Csa | Csa17g016520 | 60.541 | 887  | 1   | 881  | 0 | CNL       | different |
| At_RLP32       | LRR-RLP   | Csa | Csa19g014580 | 60.535 | 935  | 1   | 854  | 0 | LRR-RLP   | same      |
| At_RLP32       | LRR-RLP   | Csa | Csa19g014580 | 60.535 | 935  | 1   | 854  | 0 | LRR-RLP   | same      |
| Bna_LepR3/Rlm2 | LRR-RLP   | Csa | Csa19g015120 | 60.515 | 932  | 26  | 938  | 0 | LRR-RLP   | same      |
| Bna_LepR3/Rlm2 | LRR-RLP   | Csa | Csa19g015120 | 60.515 | 932  | 26  | 938  | 0 | LRR-RLP   | same      |
| At_RLM1a       | TNL       | Csa | Csa07g023960 | 60.342 | 643  | 367 | 997  | 0 | NL        | different |
| At_RLP23       | LRR-RLP   | Csa | Csa05g023480 | 60.332 | 784  | 175 | 889  | 0 | LRR-RLP   | same      |
| At_RLP23       | LRR-RLP   | Csa | Csa05g023480 | 60.332 | 784  | 175 | 889  | 0 | LRR-RLP   | same      |
| At_RPS5        | TNL       | Csa | Csa17g016520 | 60.311 | 514  | 27  | 538  | 0 | CNL       | different |
| At_RPP13       | CNL       | Csa | Csa04g029570 | 60.23  | 870  | 1   | 830  | 0 | CNL       | same      |

|             |           |     |                    |        |      |     |      |           |           |           |
|-------------|-----------|-----|--------------------|--------|------|-----|------|-----------|-----------|-----------|
| At_RLP32    | LRR-RLP   | Csa | Csa19g014800       | 60.225 | 890  | 1   | 854  | 0         | LRR-RLP   | same      |
| At_RLP32    | LRR-RLP   | Csa | Csa19g014800       | 60.225 | 890  | 1   | 854  | 0         | LRR-RLP   | same      |
| At_RLP23    | LRR-RLP   | Csa | Csa05g024200       | 60.141 | 710  | 175 | 880  | 0         | LRR-RLP   | same      |
| At_RLP23    | LRR-RLP   | Csa | Csa05g024200       | 60.141 | 710  | 175 | 880  | 0         | LRR-RLP   | same      |
| At_RPP7     | NL        | Csa | Csa16g018250       | 60.114 | 875  | 1   | 866  | 0         | NL        | same      |
| At_RPP1     | TNL       | Aha | Araha.4751s0001.1  | 60.403 | 149  | 94  | 242  | 1.07E-52  | TN        | different |
| At_RPP5     | TNL       | Aha | Araha.25586s0003.1 | 61.074 | 149  | 11  | 159  | 1.75E-55  | TX        | different |
| Bol_FocBo1  | TNL       | Aha | Araha.25586s0003.1 | 60.135 | 148  | 7   | 154  | 1.06E-55  | TX        | different |
| At_RPP5     | TNL       | Aha | Araha.66955s0001.1 | 60.784 | 153  | 3   | 155  | 7.73E-56  | TX        | different |
| At_WRR4a    | TNL       | Aha | Araha.66955s0001.1 | 61.184 | 152  | 1   | 152  | 1.97E-56  | TX        | different |
| At_RLM1a    | TNL       | Aha | Araha.66955s0001.1 | 60.135 | 148  | 7   | 154  | 9.82E-59  | TX        | different |
| Bra_cRa/cRb | TNL       | Aha | Araha.66955s0001.1 | 62.838 | 148  | 68  | 215  | 2.86E-59  | TX        | different |
| At_RPP5     | TNL       | Aha | Araha.1430s0001.1  | 61.745 | 149  | 11  | 159  | 2.34E-59  | TX        | different |
| Bol_FocBo1  | TNL       | Aha | Araha.66955s0001.1 | 63.758 | 149  | 5   | 153  | 1.36E-59  | TX        | different |
| Bra_cRa/cRb | TNL       | Aha | Araha.4751s0001.1  | 70.47  | 149  | 71  | 219  | 2.12E-60  | TN        | different |
| At_WRR4b    | TNL       | Aha | Araha.66827s0001.1 | 62.162 | 148  | 11  | 158  | 5.94E-61  | TX        | different |
| At_WRR4b    | TNL       | Aha | Araha.66955s0001.1 | 62.658 | 158  | 1   | 158  | 4.31E-61  | TX        | different |
| Bol_FocBo1  | TNL       | Aha | Araha.59926s0001.1 | 60.377 | 159  | 9   | 167  | 6.50E-62  | TX        | different |
| At_WRR9     | NL        | Aha | Araha.59926s0001.1 | 61.635 | 159  | 17  | 175  | 2.04E-63  | TX        | different |
| Bra_Crr1a   | TNL       | Aha | Araha.59926s0001.1 | 62.025 | 158  | 70  | 227  | 1.31E-64  | TX        | different |
| At_RPP1     | TNL       | Aha | Araha.5406s0003.1  | 66.86  | 172  | 64  | 235  | 5.47E-68  | TX        | different |
| At_RPP1     | TNL       | Aha | Araha.59926s0001.1 | 64.78  | 159  | 97  | 255  | 7.26E-69  | TX        | different |
| At_WRR4a    | TNL       | Aha | Araha.59926s0001.1 | 64.706 | 170  | 1   | 170  | 1.85E-69  | TX        | different |
| Bra_Crr1a   | TNL       | Aha | Araha.4751s0001.1  | 77.181 | 149  | 66  | 214  | 1.04E-69  | TN        | different |
| At_WRR9     | NL        | Aha | Araha.38723s0001.1 | 61.5   | 200  | 5   | 204  | 5.69E-70  | TX        | different |
| At_RLM1b    | TNL       | Aha | Araha.25586s0003.1 | 70.47  | 149  | 10  | 158  | 8.58E-71  | TX        | different |
| At_RLM1b    | TNL       | Aha | Araha.59926s0001.1 | 66.082 | 171  | 1   | 171  | 4.53E-71  | TX        | different |
| At_RPP1     | TNL       | Aha | Araha.38723s0001.1 | 61.809 | 199  | 87  | 285  | 4.93E-74  | TX        | different |
| At_WRR4b    | TNL       | Aha | Araha.59926s0001.1 | 66.279 | 172  | 1   | 172  | 2.72E-74  | TX        | different |
| At_RFO3     | Other-RLK | Aha | Araha.3018s0001.1  | 63.687 | 179  | 515 | 693  | 1.83E-74  | Other-RLK | same      |
| At_WRR4a    | TNL       | Aha | Araha.38723s0001.1 | 63.317 | 199  | 1   | 199  | 1.83E-74  | TX        | different |
| At_WRR4a    | TNL       | Aha | Araha.25586s0003.1 | 74.497 | 149  | 9   | 157  | 1.51E-74  | TX        | different |
| At_RPP4     | TNL       | Aha | Araha.18217s0002.1 | 69.588 | 194  | 1   | 190  | 6.67E-75  | TN        | different |
| At_RLM1a    | TNL       | Aha | Araha.59926s0001.1 | 67.456 | 169  | 3   | 171  | 3.41E-75  | TX        | different |
| At_RFO3     | Other-RLK | Aha | Araha.3018s0001.3  | 63.687 | 179  | 515 | 693  | 3.16E-76  | Other-RLK | same      |
| At_RPP5     | TNL       | Aha | Araha.18217s0002.1 | 82.781 | 151  | 10  | 160  | 1.68E-76  | TN        | different |
| At_RPP1     | TNL       | Aha | Araha.66827s0001.1 | 65.341 | 176  | 69  | 241  | 1.23E-76  | TX        | different |
| At_RPP2a    | TNL       | Aha | Araha.18217s0002.1 | 64.249 | 193  | 231 | 423  | 9.10E-77  | TN        | different |
| At_RFO3     | Other-RLK | Aha | Araha.3018s0001.2  | 63.687 | 179  | 515 | 693  | 7.30E-77  | Other-RLK | same      |
| At_RLM1a    | TNL       | Aha | Araha.25586s0003.1 | 77.852 | 149  | 10  | 158  | 2.84E-79  | TX        | different |
| At_RLM1b    | TNL       | Aha | Araha.38723s0001.1 | 66.5   | 200  | 1   | 200  | 1.97E-80  | TX        | different |
| At_WRR4b    | TNL       | Aha | Araha.25586s0003.1 | 81.132 | 159  | 1   | 159  | 2.23E-81  | TX        | different |
| At_WRR4b    | TNL       | Aha | Araha.38723s0001.1 | 63.981 | 211  | 1   | 206  | 2.07E-81  | TX        | different |
| At_RLM1a    | TNL       | Aha | Araha.38723s0001.1 | 66.162 | 198  | 3   | 200  | 1.41E-81  | TX        | different |
| At_RPP8     | CNL       | Aha | Araha.31961s0001.1 | 79.769 | 173  | 1   | 173  | 2.95E-84  | CNL       | same      |
| Bol_FocBo1  | TNL       | Aha | Araha.18217s0002.1 | 60.086 | 233  | 229 | 454  | 4.53E-93  | TN        | different |
| At_RPP4     | TNL       | Aha | Araha.18217s0002.1 | 74.672 | 229  | 232 | 453  | 7.89E-109 | TN        | different |
| At_RPP5     | TNL       | Aha | Araha.18217s0002.1 | 75.904 | 249  | 236 | 477  | 4.58E-116 | TN        | different |
| At_RLP42    | LRR-RLP   | Aha | Araha.5796s0001.1  | 67.774 | 301  | 588 | 880  | 1.19E-128 | LRR-RLP   | same      |
| Bra_Crr1a   | TNL       | Aha | Araha.4751s0001.1  | 61.19  | 353  | 69  | 421  | 6.29E-131 | TN        | different |
| At_RPP7     | NL        | Aha | Araha.10133s0001.1 | 61.818 | 330  | 1   | 329  | 2.72E-132 | NBS       | different |
| At_RLM1b    | TNL       | Aha | Araha.30867s0001.1 | 61.69  | 355  | 1   | 355  | 7.00E-153 | TN        | different |
| At_RLP23    | LRR-RLP   | Aha | Araha.5796s0001.1  | 76.898 | 303  | 588 | 890  | 9.42E-155 | LRR-RLP   | same      |
| Bju_WRR1    | CNL       | Aha | Araha.20058s0003.1 | 64.402 | 368  | 66  | 427  | 3.52E-156 | NBS       | different |
| At_NGR1b    | RNL       | Aha | Araha.11408s0002.1 | 62.35  | 417  | 406 | 815  | 3.05E-157 | NL        | different |
| At_NGR1a    | RNL       | Aha | Araha.11408s0002.1 | 65.942 | 414  | 404 | 809  | 1.86E-170 | NL        | different |
| At_RLM1a    | TNL       | Aha | Araha.30867s0001.1 | 67.787 | 357  | 1   | 357  | 2.65E-172 | TN        | different |
| At_SOBI1    | LRR-RLK   | Aha | Araha.3596s0002.1  | 95.327 | 642  | 1   | 641  | 0         | LRR-RLK   | same      |
| At_RPS5     | TNL       | Aha | Araha.0650s0020.1  | 94.831 | 890  | 1   | 889  | 0         | CNL       | different |
| At_RPS4     | TNL       | Aha | Araha.1947s0003.1  | 94.084 | 1217 | 1   | 1217 | 0         | TNL       | same      |
| At_RLP30    | LRR-RLP   | Aha | Araha.61250s0003.1 | 92.875 | 786  | 1   | 786  | 0         | LRR-RLP   | same      |
| At_WRR12    | TNL       | Aha | Araha.15627s0017.1 | 92.718 | 1030 | 1   | 1030 | 0         | TNL       | same      |
| At_RPS2     | NL        | Aha | Araha.4285s0004.1  | 92.426 | 911  | 1   | 909  | 0         | NL        | same      |
| At_RPM1     | NL        | Aha | Araha.32978s0005.1 | 91.733 | 883  | 44  | 926  | 0         | NL        | same      |
| At_RLP32    | LRR-RLP   | Aha | Araha.5514s0006.1  | 91.654 | 683  | 183 | 865  | 0         | LRR-RLP   | same      |
| At_ADR1     | NL        | Aha | Araha.3012s0003.1  | 91.624 | 788  | 1   | 787  | 0         | NL        | same      |
| At_FLS2     | LRR-RLK   | Aha | Araha.10139s0013.1 | 91.489 | 1175 | 1   | 1173 | 0         | LRR-RLK   | same      |
| At_RPS5     | TNL       | Aha | Araha.0650s0020.3  | 91.011 | 890  | 1   | 889  | 0         | CNL       | different |
| At_RPS5     | TNL       | Aha | Araha.0650s0020.2  | 91.011 | 890  | 1   | 889  | 0         | CNL       | different |
| At_RLP1     | LRR-RLP   | Aha | Araha.23444s0004.1 | 90.278 | 1080 | 1   | 1077 | 0         | LRR-RLP   | same      |
| At_RFO1     | Other-RLK | Aha | Araha.29413s0005.1 | 89.687 | 766  | 1   | 751  | 0         | Other-RLK | same      |
| At_NGR1a    | RNL       | Aha | Araha.11408s0003.1 | 89.312 | 814  | 1   | 809  | 0         | CNL       | different |
| At_RRS1     | TNL       | Aha | Araha.1947s0004.1  | 88.444 | 1298 | 1   | 1286 | 0         | TNL       | same      |
| At_BAK1     | LRR-RLK   | Aha | Araha.20697s0001.1 | 83.752 | 597  | 22  | 615  | 0         | LRR-RLK   | same      |
| At_RLP42    | LRR-RLP   | Aha | Araha.7647s0001.1  | 83.418 | 591  | 291 | 880  | 0         | LRR-RLP   | same      |
| At_RPP8     | CNL       | Aha | Araha.31961s0001.1 | 80.37  | 433  | 340 | 772  | 0         | CNL       | same      |
| At_RFO3     | Other-RLK | Aha | Araha.18229s0005.1 | 79.813 | 857  | 14  | 850  | 0         | Other-RLK | same      |
| At_RPP13    | CNL       | Aha | Araha.6729s0012.1  | 79.103 | 847  | 1   | 834  | 0         | CNL       | same      |
| At_BAK1     | LRR-RLK   | Aha | Araha.24929s0001.1 | 78.986 | 414  | 23  | 376  | 0         | LRR-RLK   | same      |
| At_RPP2b    | TNL       | Aha | Araha.8600s0002.2  | 78.821 | 831  | 381 | 1207 | 0         | NL        | different |
| At_RLP32    | LRR-RLP   | Aha | Araha.24867s0001.1 | 77.324 | 441  | 415 | 854  | 0         | LRR-RLP   | same      |
| At_RLM1a    | TNL       | Aha | Araha.3236s0003.1  | 77.247 | 712  | 4   | 715  | 0         | TNL       | same      |
| At_RPP2a    | TNL       | Aha | Araha.8600s0003.1  | 76.752 | 856  | 409 | 1257 | 0         | TNL       | same      |
| At_WRR4a    | TNL       | Aha | Araha.30867s0001.1 | 76.554 | 354  | 1   | 353  | 0         | TN        | different |
| At_NGR1b    | RNL       | Aha | Araha.11408s0003.1 | 76.415 | 636  | 5   | 633  | 0         | CNL       | different |
| At_BAK1     | LRR-RLK   | Aha | Araha.5645s0001.1  | 75.929 | 619  | 9   | 615  | 0         | LRR-RLK   | same      |



|                |           |     |                    |        |      |     |      |           |           |           |
|----------------|-----------|-----|--------------------|--------|------|-----|------|-----------|-----------|-----------|
| At_RPP2b       | TNL       | Aha | Araha.8600s0002.1  | 75.495 | 1212 | 1   | 1207 | 0         | TNL       | same      |
| At_RLM3        | TN        | Aha | Araha.16675s0001.1 | 74.327 | 483  | 159 | 605  | 0         | NBS       | different |
| At_WRR4b       | TNL       | Aha | Araha.30867s0001.1 | 74.221 | 353  | 3   | 355  | 0         | TN        | different |
| At_RFO2        | LRR-RLP   | Aha | Araha.2722s0007.1  | 72.849 | 744  | 6   | 749  | 0         | LRR-RLP   | same      |
| At_RFO3        | Other-RLK | Aha | Araha.11090s0001.1 | 72     | 725  | 134 | 850  | 0         | Other-RLK | same      |
| At_RPP8        | CNL       | Aha | Araha.11242s0013.2 | 71.944 | 720  | 193 | 908  | 0         | NL        | different |
| At_RLP23       | LRR-RLP   | Aha | Araha.7647s0001.1  | 71.215 | 601  | 290 | 890  | 0         | LRR-RLP   | same      |
| At_RPP8        | CNL       | Aha | Araha.11242s0013.1 | 71.131 | 911  | 1   | 907  | 0         | CNL       | same      |
| At_NGR1b       | RNL       | Aha | Araha.11408s0003.1 | 71.011 | 821  | 5   | 815  | 0         | CNL       | different |
| Bna_Rlm9/4/7   | Other-RLK | Aha | Araha.15691s0004.1 | 70.274 | 804  | 1   | 794  | 0         | Other-RLK | same      |
| Bna_LepR3/Rlm2 | LRR-RLP   | Aha | Araha.24867s0001.1 | 69.248 | 452  | 502 | 948  | 0         | LRR-RLP   | same      |
| At_RLM1b       | TNL       | Aha | Araha.15145s0001.1 | 69.194 | 844  | 66  | 901  | 0         | TNL       | same      |
| Bna_Rlm9/4/7   | Other-RLK | Aha | Araha.29413s0004.1 | 68.863 | 774  | 24  | 794  | 0         | Other-RLK | same      |
| At_RFO1        | Other-RLK | Aha | Araha.1482s0001.1  | 68.62  | 529  | 210 | 733  | 0         | Other-RLK | same      |
| At_RPS4        | TNL       | Aha | Araha.2395s0003.2  | 68.189 | 635  | 198 | 821  | 0         | NL        | different |
| At_RLM1b       | TNL       | Aha | Araha.3236s0003.1  | 68.061 | 717  | 5   | 721  | 0         | TNL       | same      |
| At_RLP1        | LRR-RLP   | Aha | Araha.23444s0005.1 | 66.954 | 1044 | 44  | 1077 | 0         | LRR-RLP   | same      |
| At_RPP8        | CNL       | Aha | Araha.3152s0005.2  | 66.557 | 909  | 1   | 904  | 0         | CNL       | same      |
| At_RPP8        | CNL       | Aha | Araha.3152s0005.1  | 66.557 | 909  | 1   | 904  | 0         | CNL       | same      |
| At_NGR1a       | RNL       | Aha | Araha.11408s0003.1 | 66.553 | 589  | 1   | 573  | 0         | CNL       | different |
| Bna_Rlm9/4/7   | Other-RLK | Aha | Araha.29413s0003.1 | 66.294 | 537  | 263 | 793  | 0         | Other-RLK | same      |
| At_RLP1        | LRR-RLP   | Aha | Araha.10536s0003.1 | 66.262 | 824  | 249 | 1065 | 0         | LRR-RLP   | same      |
| At_RPS5        | TNL       | Aha | Araha.1122s0007.1  | 66.142 | 889  | 1   | 883  | 0         | NL        | different |
| At_RPP8        | CNL       | Aha | Araha.3450s0004.1  | 66.083 | 914  | 1   | 908  | 0         | NL        | different |
| At_RPP8        | CNL       | Aha | Araha.3450s0004.2  | 66.083 | 914  | 1   | 908  | 0         | NL        | different |
| At_RPS5        | TNL       | Aha | Araha.0650s0013.1  | 65.607 | 881  | 1   | 880  | 0         | CNL       | different |
| Bna_LepR3/Rlm2 | LRR-RLP   | Aha | Araha.34729s0003.1 | 65.586 | 956  | 1   | 949  | 0         | LRR-RLP   | same      |
| At_RFO1        | Other-RLK | Aha | Araha.53748s0001.1 | 65.546 | 476  | 232 | 704  | 0         | Other-RLK | same      |
| At_WRR4b       | TNL       | Aha | Araha.3236s0003.1  | 65.229 | 719  | 1   | 718  | 0         | TNL       | same      |
| At_RPP7        | NL        | Aha | Araha.25006s0001.1 | 65.152 | 726  | 150 | 866  | 0         | NL        | same      |
| At_RLP23       | LRR-RLP   | Aha | Araha.20926s0004.1 | 64.993 | 717  | 175 | 889  | 0         | LRR-RLP   | same      |
| At_RLP32       | LRR-RLP   | Aha | Araha.12216s0001.1 | 64.892 | 883  | 29  | 850  | 0         | LRR-RLP   | same      |
| At_RPS4        | TNL       | Aha | Araha.2395s0003.1  | 64.601 | 839  | 4   | 821  | 0         | TNL       | same      |
| At_RFO1        | Other-RLK | Aha | Araha.1482s0002.1  | 64.481 | 732  | 10  | 718  | 0         | Other-RLK | same      |
| At_RLP23       | LRR-RLP   | Aha | Araha.4280s0013.1  | 64.426 | 714  | 175 | 886  | 0         | LRR-RLP   | same      |
| At_RPP7        | NL        | Aha | Araha.13235s0001.1 | 64.133 | 750  | 126 | 869  | 0         | NL        | same      |
| At_RLM1a       | TNL       | Aha | Araha.12875s0001.1 | 64.036 | 1001 | 1   | 988  | 0         | TNL       | same      |
| At_WRR9        | NL        | Aha | Araha.3236s0003.1  | 64.017 | 717  | 5   | 720  | 0         | TNL       | different |
| At_RLM1a       | TNL       | Aha | Araha.15145s0001.1 | 64.005 | 839  | 66  | 898  | 0         | TNL       | same      |
| Bna_LepR3/Rlm2 | LRR-RLP   | Aha | Araha.5514s0006.1  | 63.942 | 685  | 275 | 950  | 0         | LRR-RLP   | same      |
| At_RPP13       | CNL       | Aha | Araha.21372s0011.1 | 63.94  | 868  | 1   | 830  | 0         | CNL       | same      |
| At_RPS5        | TNL       | Aha | Araha.0650s0021.1  | 63.636 | 891  | 1   | 885  | 0         | CNL       | different |
| At_RLP42       | LRR-RLP   | Aha | Araha.4280s0013.1  | 63.61  | 698  | 182 | 875  | 0         | LRR-RLP   | same      |
| At_WRR8        | TNL       | Aha | Araha.28366s0002.1 | 63.425 | 1203 | 20  | 1137 | 0         | TNL       | same      |
| At_WRR9        | NL        | Aha | Araha.0550s0005.1  | 63.352 | 1086 | 16  | 1095 | 0         | TNL       | different |
| At_RLM1b       | TNL       | Aha | Araha.0550s0005.1  | 63.284 | 1005 | 10  | 997  | 0         | TNL       | same      |
| At_RPP8        | CNL       | Aha | Araha.20058s0003.1 | 63.274 | 452  | 66  | 516  | 0         | NBS       | different |
| At_RLM1a       | TNL       | Aha | Araha.34654s0002.1 | 62.791 | 817  | 187 | 997  | 0         | NL        | different |
| At_RLP30       | LRR-RLP   | Aha | Araha.5378s0001.1  | 62.768 | 513  | 276 | 786  | 0         | LRR-RLP   | same      |
| At_WRR8        | TNL       | Aha | Araha.8200s0005.1  | 62.737 | 738  | 17  | 745  | 0         | TNL       | same      |
| At_RAC1        | TNL       | Aha | Araha.28366s0002.1 | 62.727 | 1210 | 9   | 1156 | 0         | TNL       | same      |
| Bna_Rlm9/4/7   | Other-RLK | Aha | Araha.2578s0001.1  | 62.516 | 779  | 22  | 793  | 0         | Other-RLK | same      |
| At_RLP42       | LRR-RLP   | Aha | Araha.20926s0004.1 | 62.256 | 718  | 182 | 889  | 0         | LRR-RLP   | same      |
| At_WRR12       | TNL       | Aha | Araha.16807s0001.1 | 61.858 | 1012 | 18  | 1021 | 0         | TNL       | same      |
| At_RLP30       | LRR-RLP   | Aha | Araha.12235s0001.1 | 61.779 | 798  | 1   | 779  | 0         | LRR-RLP   | same      |
| At_WRR8        | TNL       | Aha | Araha.5427s0001.1  | 61.722 | 755  | 12  | 757  | 0         | TNL       | same      |
| At_RAC1        | TNL       | Aha | Araha.8200s0005.1  | 61.673 | 741  | 6   | 735  | 0         | TNL       | same      |
| At_RLP32       | LRR-RLP   | Aha | Araha.34729s0003.1 | 61.255 | 924  | 1   | 854  | 0         | LRR-RLP   | same      |
| At_RAC1        | TNL       | Aha | Araha.5427s0001.1  | 61.141 | 754  | 1   | 747  | 0         | TNL       | same      |
| At_RLM1a       | TNL       | Aha | Araha.15917s0002.1 | 60.965 | 912  | 5   | 914  | 0         | TNL       | same      |
| At_RLM1b       | TNL       | Aha | Araha.12875s0001.1 | 60.905 | 995  | 1   | 979  | 0         | TNL       | same      |
| At_RLP30       | LRR-RLP   | Aha | Araha.28473s0001.1 | 60.653 | 521  | 255 | 774  | 0         | LRR-RLP   | same      |
| At_WRR9        | NL        | Aha | Araha.15145s0001.1 | 60.373 | 858  | 71  | 920  | 0         | TNL       | different |
| Bju_WRR1       | CNL       | Aha | Araha.11242s0013.2 | 60.362 | 719  | 188 | 900  | 0         | NL        | different |
| Bju_WRR1       | CNL       | Aha | Araha.11242s0013.1 | 60.044 | 911  | 1   | 900  | 0         | CNL       | same      |
| At_RPP7        | NL        | Aha | Araha.44858s0001.1 | 60.035 | 568  | 112 | 677  | 0         | NL        | same      |
| At_RPP1        | TNL       | Aly | AL2G28690.t1       | 62.581 | 155  | 98  | 252  | 2.31E-58  | TX        | different |
| Bra_Crr1a      | TNL       | Aly | AL2G28690.t1       | 73.718 | 156  | 69  | 224  | 6.49E-71  | TX        | different |
| At_RPP1        | TNL       | Aly | AL4G22240.t1       | 61.751 | 217  | 89  | 305  | 1.16E-79  | TNL       | same      |
| At_RLM1b       | TNL       | Aly | AL4G22240.t1       | 64.423 | 208  | 13  | 220  | 1.55E-80  | TNL       | same      |
| At_WRR9        | NL        | Aly | AL1G66180.t1       | 60.776 | 232  | 168 | 398  | 7.05E-81  | NL        | same      |
| At_RLM1b       | TNL       | Aly | AL2G11220.t1       | 73.404 | 188  | 1   | 188  | 3.01E-83  | TNL       | same      |
| At_RPP1        | TNL       | Aly | AL786U10010.t1     | 63.959 | 197  | 312 | 508  | 2.03E-83  | NBS       | different |
| At_WRR4a       | TNL       | Aly | AL2G11220.t1       | 73.404 | 188  | 9   | 196  | 3.96E-87  | TNL       | same      |
| At_RLM1b       | TNL       | Aly | AL7G41850.t1       | 63.137 | 255  | 76  | 329  | 5.15E-88  | Other-NLR | different |
| At_WRR4b       | TNL       | Aly | AL7G41850.t1       | 64.706 | 255  | 77  | 329  | 1.11E-89  | Other-NLR | different |
| At_RLM1b       | TNL       | Aly | AL1G66180.t1       | 60.643 | 249  | 147 | 395  | 1.15E-90  | NL        | different |
| At_RLM1a       | TNL       | Aly | AL7G41850.t1       | 65.098 | 255  | 76  | 329  | 7.78E-91  | Other-NLR | different |
| At_RLM1a       | TNL       | Aly | AL1G66180.t1       | 63.948 | 233  | 162 | 394  | 5.96E-91  | NL        | different |
| At_RLP30       | LRR-RLP   | Aly | AL4G14280.t1       | 70.936 | 203  | 585 | 786  | 2.68E-92  | LRR-RLP   | same      |
| At_WRR4b       | TNL       | Aly | AL2G11220.t1       | 83.146 | 178  | 11  | 188  | 3.78E-95  | TNL       | same      |
| At_WRR4a       | TNL       | Aly | AL1G66180.t1       | 62.595 | 262  | 150 | 408  | 3.18E-97  | NL        | different |
| At_RLM1a       | TNL       | Aly | AL2G11220.t1       | 84.574 | 188  | 1   | 188  | 2.71E-97  | TNL       | same      |
| At_RRS1        | TNL       | Aly | AL8G13710.t1       | 64     | 275  | 896 | 1169 | 2.88E-103 | TX        | different |
| At_RPP8        | CNL       | Aly | AL625U10020.t1     | 73.894 | 226  | 1   | 226  | 4.82E-107 | CN        | different |
| At_WRR4b       | TNL       | Aly | AL1G66180.t1       | 71.315 | 251  | 163 | 410  | 1.06E-109 | NL        | different |



|              |           |     |                |        |      |     |      |           |           |           |
|--------------|-----------|-----|----------------|--------|------|-----|------|-----------|-----------|-----------|
| At_RPP1      | TNL       | Aly | AL20U10050.t1  | 65.568 | 273  | 96  | 368  | 5.36E-116 | TNL       | same      |
| At_RAC1      | TNL       | Aly | AL8G18480.t1   | 65.033 | 306  | 12  | 314  | 1.99E-116 | TN        | different |
| At_RPS4      | TNL       | Aly | AL8G13590.t1   | 94.527 | 201  | 1   | 201  | 1.36E-117 | Other-NLR | different |
| At_WRR8      | TNL       | Aly | AL8G18480.t1   | 64.262 | 305  | 23  | 324  | 6.97E-120 | TN        | different |
| At_RFO3      | Other-RLK | Aly | AL3G28680.t1   | 83.478 | 230  | 19  | 238  | 1.51E-123 | Other-RLK | same      |
| Bra_cRa/cRb  | TNL       | Aly | AL20U10050.t1  | 61.095 | 347  | 1   | 345  | 1.03E-124 | TNL       | same      |
| Bra_Crr1a    | TNL       | Aly | AL20U10050.t1  | 72.161 | 273  | 68  | 340  | 9.86E-128 | TNL       | same      |
| At_WRR4a     | TNL       | Aly | AL2G23700.t1   | 60.302 | 398  | 43  | 436  | 5.52E-147 | TN        | different |
| At_RAC1      | TNL       | Aly | AL8G11900.t1   | 61.253 | 431  | 3   | 430  | 1.09E-147 | Other-NLR | different |
| At_RLM1b     | TNL       | Aly | AL2G23700.t1   | 64.722 | 360  | 44  | 401  | 2.61E-148 | TN        | different |
| At_WRR8      | TNL       | Aly | AL8G11900.t1   | 60.93  | 430  | 14  | 438  | 2.14E-151 | Other-NLR | different |
| At_RPP7      | NL        | Aly | AL1G65650.t1   | 65.698 | 344  | 1   | 343  | 9.08E-153 | NBS       | different |
| At_RLM1a     | TNL       | Aly | AL1G65640.t1   | 62.67  | 442  | 1   | 440  | 8.09E-163 | TNL       | same      |
| Bra_Crr1a    | TNL       | Aly | AL5G16480.t1   | 61.675 | 394  | 67  | 460  | 3.66E-166 | TN        | different |
| At_RPP2a     | TNL       | Aly | AL7G37760.t1   | 64.286 | 406  | 9   | 414  | 1.31E-168 | Other-NLR | different |
| At_NGR1b     | RNL       | Aly | AL8G44510.t1   | 63.549 | 417  | 406 | 815  | 4.32E-170 | NL        | different |
| Bra_cRa/cRb  | TNL       | Aly | AL7G14900.t1   | 63.326 | 439  | 65  | 503  | 1.26E-174 | TNL       | same      |
| At_WRR4b     | TNL       | Aly | AL2G23700.t1   | 67.254 | 397  | 45  | 439  | 5.35E-175 | TN        | different |
| At_BAK1      | LRR-RLK   | Aly | AL7G18140.t1   | 99.35  | 615  | 1   | 615  | 0         | LRR-RLK   | same      |
| At_RPS5      | TNL       | Aly | AL1G23500.t1   | 95.52  | 692  | 122 | 812  | 0         | NL        | different |
| At_SOBR1     | LRR-RLK   | Aly | AL4G27170.t1   | 94.548 | 642  | 1   | 641  | 0         | LRR-RLK   | same      |
| At_RPS2      | NL        | Aly | AL7G26890.t1   | 92.865 | 911  | 1   | 909  | 0         | NL        | same      |
| At_RLP30     | LRR-RLP   | Aly | AL3G15860.t1   | 92.494 | 786  | 1   | 786  | 0         | LRR-RLP   | same      |
| At_ADR1      | NL        | Aly | AL1G47950.t1   | 92.259 | 788  | 1   | 787  | 0         | NL        | same      |
| At_RLP1      | LRR-RLP   | Aly | AL1G17550.t1   | 91.736 | 1077 | 1   | 1077 | 0         | LRR-RLP   | same      |
| At_RPM1      | NL        | Aly | AL3G18260.t1   | 91.037 | 926  | 1   | 926  | 0         | NL        | same      |
| At_NGR1a     | RNL       | Aly | AL8G44500.t1   | 89.312 | 814  | 1   | 809  | 0         | CNL       | different |
| At_RRS1      | TNL       | Aly | AL8G13580.t1   | 87.318 | 1238 | 1   | 1228 | 0         | TNL       | same      |
| At_RPS4      | TNL       | Aly | AL8G13590.t1   | 86.268 | 619  | 284 | 902  | 0         | Other-NLR | different |
| At_FLS2      | LRR-RLK   | Aly | AL8G12090.t1   | 85.532 | 1175 | 1   | 1173 | 0         | LRR-RLK   | same      |
| At_WRR4b     | TNL       | Aly | AL1G66350.t2   | 85.271 | 774  | 11  | 764  | 0         | TNL       | same      |
| At_RPP8      | CNL       | Aly | AL293U10010.t1 | 85.201 | 473  | 1   | 473  | 0         | CN        | different |
| At_WRR12     | TNL       | Aly | AL1G29920.t1   | 85.181 | 992  | 1   | 992  | 0         | TNL       | same      |
| At_RPP8      | CNL       | Aly | AL43U10010.t1  | 84.052 | 696  | 1   | 696  | 0         | CNL       | same      |
| At_RLP42     | LRR-RLP   | Aly | AL3G40650.t1   | 83.565 | 864  | 18  | 880  | 0         | LRR-RLP   | same      |
| At_RFO1      | Other-RLK | Aly | AL2G40360.t1   | 83.438 | 477  | 230 | 705  | 0         | Other-RLK | same      |
| At_WRR4b     | TNL       | Aly | AL1G66350.t1   | 82.558 | 774  | 11  | 764  | 0         | TNL       | same      |
| At_BAK1      | LRR-RLK   | Aly | AL3G45570.t1   | 82.392 | 602  | 17  | 615  | 0         | LRR-RLK   | same      |
| At_RLP32     | LRR-RLP   | Aly | AL3G16300.t1   | 79.299 | 628  | 1   | 625  | 0         | LRR-RLP   | same      |
| At_RPP8      | CNL       | Aly | AL8G21640.t1   | 78.611 | 907  | 1   | 907  | 0         | CNL       | same      |
| At_RLP42     | LRR-RLP   | Aly | AL3G40730.t1   | 78.523 | 880  | 1   | 879  | 0         | LRR-RLP   | same      |
| At_WRR8      | TNL       | Aly | AL8G12190.t1   | 78.343 | 1159 | 12  | 1139 | 0         | TNL       | same      |
| At_BAK1      | LRR-RLK   | Aly | AL2G31410.t1   | 77.424 | 629  | 1   | 615  | 0         | LRR-RLK   | same      |
| At_BAK1      | LRR-RLK   | Aly | AL3G45640.t1   | 77.393 | 606  | 10  | 615  | 0         | LRR-RLK   | same      |
| At_RPP2b     | TNL       | Aly | AL7G34610.t1   | 76.073 | 1212 | 1   | 1207 | 0         | TNL       | same      |
| At_RPP4      | TNL       | Aly | AL7G37760.t1   | 75.896 | 1116 | 1   | 1115 | 0         | Other-NLR | different |
| At_BAK1      | LRR-RLK   | Aly | AL1G48710.t1   | 75.654 | 612  | 16  | 615  | 0         | LRR-RLK   | same      |
| At_RFO3      | Other-RLK | Aly | AL3G28680.t1   | 74.806 | 516  | 339 | 850  | 0         | Other-RLK | same      |
| At_RPP5      | TNL       | Aly | AL7G37760.t1   | 74.673 | 1070 | 10  | 1075 | 0         | Other-NLR | different |
| At_RAC1      | TNL       | Aly | AL8G12190.t1   | 74.144 | 1168 | 1   | 1156 | 0         | TNL       | same      |
| At_RPP2a     | TNL       | Aly | AL2G17260.t1   | 73.732 | 769  | 533 | 1300 | 0         | TNL       | same      |
| Bna_Rlm9/4/7 | Other-RLK | Aly | AL3G52440.t1   | 72.587 | 777  | 24  | 793  | 0         | Other-RLK | same      |
| Bna_Rlm9/4/7 | Other-RLK | Aly | AL3G52410.t1   | 72.587 | 777  | 24  | 793  | 0         | Other-RLK | same      |
| At_WRR8      | TNL       | Aly | AL8G11920.t1   | 72.333 | 1153 | 12  | 1136 | 0         | TNL       | same      |
| At_RPP2a     | TNL       | Aly | AL7G34620.t1   | 71.899 | 911  | 409 | 1299 | 0         | TNL       | same      |
| At_RLP23     | LRR-RLP   | Aly | AL4G16860.t1   | 71.689 | 876  | 17  | 888  | 0         | LRR-RLP   | same      |
| At_NGR1b     | RNL       | Aly | AL8G44500.t1   | 71.62  | 821  | 5   | 815  | 0         | CNL       | different |
| At_RRS1      | TNL       | Aly | AL8G13740.t1   | 71.246 | 1019 | 1   | 1005 | 0         | TNL       | same      |
| At_RPP8      | CNL       | Aly | AL1G61840.t2   | 71.116 | 914  | 1   | 908  | 0         | CNL       | same      |
| At_RPS4      | TNL       | Aly | AL8G13750.t1   | 71.085 | 1207 | 1   | 1192 | 0         | TNL       | same      |
| At_RPP7      | NL        | Aly | AL2G17650.t1   | 71.034 | 870  | 1   | 866  | 0         | NL        | same      |
| At_RFO2      | LRR-RLP   | Aly | AL1G29490.t1   | 70.963 | 737  | 4   | 740  | 0         | LRR-RLP   | same      |
| At_RPP13     | CNL       | Aly | AL5G25700.t1   | 70.651 | 845  | 1   | 830  | 0         | NL        | different |
| At_RLM1a     | TNL       | Aly | AL3G49580.t1   | 70.523 | 994  | 4   | 991  | 0         | TNL       | same      |
| At_RPP39     | CNL       | Aly | AL2G15160.t1   | 70.472 | 911  | 1   | 878  | 0         | CNL       | same      |
| At_RLP42     | LRR-RLP   | Aly | AL4G16860.t1   | 70.208 | 866  | 18  | 876  | 0         | LRR-RLP   | same      |
| At_RPP8      | CNL       | Aly | AL1G21900.t1   | 69.737 | 912  | 1   | 908  | 0         | CNL       | same      |
| At_RAC1      | TNL       | Aly | AL8G11920.t1   | 69.633 | 1225 | 1   | 1160 | 0         | TNL       | same      |
| At_RFO1      | Other-RLK | Aly | AL1G28270.t1   | 69.558 | 588  | 115 | 694  | 0         | Other-RLK | same      |
| At_RLP23     | LRR-RLP   | Aly | AL3G40650.t1   | 69.143 | 875  | 17  | 890  | 0         | LRR-RLP   | same      |
| At_RFO2      | LRR-RLP   | Aly | AL2G31980.t1   | 69.083 | 731  | 20  | 750  | 0         | LRR-RLK   | different |
| At_RRS1      | TNL       | Aly | AL8G13770.t1   | 68.985 | 532  | 8   | 536  | 0         | NBS       | different |
| At_NGR1b     | RNL       | Aly | AL8G44490.t1   | 68.675 | 747  | 64  | 806  | 0         | NL        | different |
| At_RPP1      | TNL       | Aly | AL1G67230.t1   | 68.41  | 459  | 94  | 551  | 0         | TN        | different |
| At_RPP8      | CNL       | Aly | AL1G61840.t1   | 68.162 | 914  | 1   | 908  | 0         | CNL       | same      |
| At_RFO3      | Other-RLK | Aly | AL2G26120.t1   | 68.054 | 817  | 23  | 823  | 0         | Other-RLK | same      |
| At_RLP32     | LRR-RLP   | Aly | AL3G22620.t2   | 67.807 | 497  | 360 | 854  | 0         | LRR-RLP   | same      |
| At_WRR8      | TNL       | Aly | AL8G11950.t1   | 67.681 | 526  | 16  | 535  | 0         | TN        | different |
| At_RLM1b     | TNL       | Aly | AL2G11260.t1   | 67.659 | 1008 | 1   | 997  | 0         | Other-NLR | different |
| Bna_Rlm9/4/7 | Other-RLK | Aly | AL2G40380.t1   | 67.253 | 455  | 263 | 709  | 0         | Other-RLK | same      |
| At_RAC1      | TNL       | Aly | AL8G11950.t1   | 67.17  | 530  | 1   | 523  | 0         | TN        | different |
| At_RPP13     | CNL       | Aly | AL5G25710.t1   | 67.012 | 773  | 1   | 743  | 0         | CNL       | same      |
| At_RPS4      | TNL       | Aly | AL8G13700.t1   | 66.838 | 1164 | 7   | 1165 | 0         | Other-NLR | different |
| At_NGR1a     | RNL       | Aly | AL8G44510.t1   | 66.667 | 414  | 404 | 809  | 0         | NL        | different |
| At_WRR4a     | TNL       | Aly | AL1G66350.t2   | 66.372 | 791  | 1   | 770  | 0         | TNL       | same      |
| At_RLP1      | LRR-RLP   | Aly | AL1G17540.t2   | 66.208 | 1089 | 1   | 1077 | 0         | LRR-RLP   | same      |

|                |           |     |                                                  |        |      |     |      |           |           |           |
|----------------|-----------|-----|--------------------------------------------------|--------|------|-----|------|-----------|-----------|-----------|
| At_RFO1        | Other-RLK | Aly | AL1G28270.t1                                     | 66.141 | 697  | 27  | 704  | 0         | Other-RLK | same      |
| At_RPS5        | TNL       | Aly | AL1G23480.t1                                     | 66.105 | 891  | 1   | 885  | 0         | CNL       | different |
| At_RLP1        | LRR-RLP   | Aly | AL1G17310.t1                                     | 66.019 | 824  | 249 | 1065 | 0         | LRR-RLP   | same      |
| At_RPS4        | TNL       | Aly | AL8G14360.t1                                     | 65.998 | 1147 | 11  | 1133 | 0         | TNL       | same      |
| At_RLP1        | LRR-RLP   | Aly | AL1G17540.t1                                     | 65.932 | 1089 | 1   | 1077 | 0         | LRR-RLP   | same      |
| At_RLP23       | LRR-RLP   | Aly | AL4G28610.t1                                     | 65.915 | 710  | 184 | 888  | 0         | LRR-RLP   | same      |
| Bna_Rlm9/4/7   | Other-RLK | Aly | AL2G28900.t1                                     | 65.863 | 788  | 28  | 794  | 0         | Other-RLK | same      |
| Bju_WRR1       | CNL       | Aly | AL293U10010.t1                                   | 65.828 | 477  | 1   | 469  | 0         | CN        | different |
| Bra_Crr1a      | TNL       | Aly | AL1G67230.t1                                     | 65.795 | 459  | 66  | 524  | 0         | TN        | different |
| Bra_Crr1a      | TNL       | Aly | AL7G31750.t1                                     | 65.714 | 525  | 66  | 590  | 0         | TN        | different |
| At_RLP23       | LRR-RLP   | Aly | AL3G40730.t1                                     | 65.657 | 891  | 1   | 890  | 0         | LRR-RLP   | same      |
| At_RRS1        | TNL       | Aly | AL8G14320.t1                                     | 65.559 | 752  | 6   | 704  | 0         | TNL       | same      |
| At_RLM1b       | TNL       | Aly | AL2G11240.t1                                     | 65.554 | 1019 | 1   | 1004 | 0         | TNL       | same      |
| At_RPP8        | CNL       | Aly | AL7G39090.t1                                     | 65.265 | 904  | 1   | 899  | 0         | CNL       | same      |
| At_RPS4        | TNL       | Aly | AL8G14240.t1                                     | 65.259 | 1160 | 4   | 1139 | 0         | TNL       | same      |
| At_RFO1        | Other-RLK | Aly | AL1G28280.t1                                     | 65.132 | 760  | 6   | 751  | 0         | Other-RLK | same      |
| At_RLP23       | LRR-RLP   | Aly | AL4G28600.t1                                     | 64.854 | 717  | 175 | 889  | 0         | LRR-RLP   | same      |
| At_RFO1        | Other-RLK | Aly | AL1G28290.t1                                     | 64.674 | 736  | 19  | 738  | 0         | Other-RLK | same      |
| At_RPP7        | NL        | Aly | AL2G17830.t1                                     | 64.612 | 876  | 1   | 866  | 0         | NL        | same      |
| At_WRR4a       | TNL       | Aly | AL1G66350.t1                                     | 64.475 | 791  | 1   | 770  | 0         | TNL       | same      |
| At_WRR4b       | TNL       | Aly | AL1G66260.t1                                     | 64.158 | 1063 | 1   | 1058 | 0         | TNL       | same      |
| At_RLP32       | LRR-RLP   | Aly | AL3G16310.t1                                     | 64.129 | 867  | 28  | 868  | 0         | LRR-RLP   | same      |
| Bra_Crr1a      | TNL       | Aly | AL8G17970.t1                                     | 64.085 | 749  | 68  | 807  | 0         | TNL       | same      |
| At_RLM1a       | TNL       | Aly | AL2G14410.t1                                     | 63.964 | 999  | 5   | 997  | 0         | TNL       | same      |
| Bna_Rlm9/4/7   | Other-RLK | Aly | AL2G40360.t1                                     | 63.915 | 424  | 325 | 737  | 0         | Other-RLK | same      |
| At_RPS4        | TNL       | Aly | AL8G13790.t1                                     | 63.879 | 1160 | 7   | 1151 | 0         | TNL       | same      |
| At_RLP42       | LRR-RLP   | Aly | AL4G28610.t1                                     | 63.585 | 714  | 184 | 889  | 0         | LRR-RLP   | same      |
| At_RPP1        | TNL       | Aly | AL4G22780.t1                                     | 63.333 | 450  | 93  | 542  | 0         | TN        | different |
| At_RRS1        | TNL       | Aly | AL8G13620.t1                                     | 63.286 | 1272 | 11  | 1169 | 0         | NL        | different |
| Bju_WRR1       | CNL       | Aly | AL1G61840.t2                                     | 63.256 | 909  | 1   | 900  | 0         | CNL       | same      |
| At_RPS5        | TNL       | Aly | AL7G41510.t1                                     | 63.105 | 889  | 1   | 883  | 0         | CNL       | different |
| At_RLP32       | LRR-RLP   | Aly | AL3G46870.t1                                     | 62.899 | 752  | 110 | 845  | 0         | LRR-RLP   | same      |
| Bra_Crr1a      | TNL       | Aly | AL7G14900.t1                                     | 62.869 | 474  | 57  | 530  | 0         | TNL       | same      |
| Bra_Crr1a      | TNL       | Aly | AL4G22780.t1                                     | 62.857 | 455  | 64  | 518  | 0         | TN        | different |
| Bju_WRR1       | CNL       | Aly | AL43U10010.t1                                    | 62.837 | 705  | 1   | 695  | 0         | CNL       | same      |
| At_WRR4a       | TNL       | Aly | AL1G66260.t1                                     | 62.563 | 999  | 1   | 998  | 0         | TNL       | same      |
| At_RPS5        | TNL       | Aly | AL1G23590.t1                                     | 62.543 | 881  | 1   | 880  | 0         | CNL       | different |
| At_RLP42       | LRR-RLP   | Aly | AL4G28600.t1                                     | 62.535 | 718  | 182 | 889  | 0         | LRR-RLP   | same      |
| At_ADR1        | NL        | Aly | AL6G14380.t1                                     | 62.408 | 814  | 6   | 787  | 0         | NL        | same      |
| At_RPP7        | NL        | Aly | AL2G17810.t1                                     | 62.372 | 877  | 1   | 869  | 0         | NL        | same      |
| At_RLP42       | LRR-RLP   | Aly | AL7G37050.t1                                     | 62.212 | 868  | 18  | 876  | 0         | LRR-RLP   | same      |
| Bna_LepR3/Rlm2 | LRR-RLP   | Aly | AL3G16310.t1                                     | 61.783 | 785  | 176 | 950  | 0         | LRR-RLP   | same      |
| At_RLM1a       | TNL       | Aly | AL1G66330.t1                                     | 61.705 | 833  | 10  | 839  | 0         | TNL       | same      |
| At_RLM1a       | TNL       | Aly | AL1G66350.t2                                     | 61.32  | 773  | 10  | 759  | 0         | TNL       | same      |
| At_RLM1a       | TNL       | Aly | AL2G11240.t1                                     | 61.184 | 997  | 3   | 986  | 0         | TNL       | same      |
| Bna_LepR3/Rlm2 | LRR-RLP   | Aly | AL3G22620.t2                                     | 61.1   | 509  | 442 | 948  | 0         | LRR-RLP   | same      |
| Bju_WRR1       | CNL       | Aly | AL1G61840.t1                                     | 60.946 | 909  | 1   | 900  | 0         | CNL       | same      |
| At_NGR1a       | RNL       | Aly | AL8G44490.t1                                     | 60.858 | 746  | 68  | 800  | 0         | NL        | different |
| At_RRS1        | TNL       | Aly | AL8G14230.t1                                     | 60.766 | 1305 | 8   | 1288 | 0         | NL        | different |
| At_RLM1b       | TNL       | Aly | AL3G49580.t1                                     | 60.685 | 992  | 5   | 985  | 0         | TNL       | same      |
| Bra_cRa/cRb    | TNL       | Aly | AL1G67230.t1                                     | 60.667 | 450  | 73  | 522  | 0         | TN        | different |
| At_RPP7        | NL        | Aly | AL1G65670.t1                                     | 60.64  | 531  | 349 | 866  | 0         | NL        | same      |
| At_RLP23       | LRR-RLP   | Aly | AL7G37050.t1                                     | 60.523 | 879  | 10  | 887  | 0         | LRR-RLP   | same      |
| At_WRR12       | TNL       | Aly | AL7G49910.t1                                     | 60.419 | 907  | 12  | 915  | 0         | TNL       | same      |
| At_WRR8        | TNL       | Aly | AL2G19370.t1                                     | 60.218 | 734  | 19  | 745  | 0         | TNL       | same      |
| At_RLM1a       | TNL       | Aly | AL2G11260.t1                                     | 60.18  | 1002 | 1   | 997  | 0         | Other-NLR | different |
| Bna_Rlm9/4/7   | Other-RLK | Bvu | maker-Contig382-snap-gene-0.50-mRNA-1            | 70.886 | 158  | 567 | 724  | 6.86E-59  | Other-RLK | same      |
| At_RFO1        | Other-RLK | Bvu | maker-Contig382-snap-gene-0.50-mRNA-1            | 73.856 | 153  | 534 | 686  | 8.02E-64  | Other-RLK | same      |
| At_WRR8        | TNL       | Bvu | maker-Contig2985-snap-gene-0.2-mRNA-1            | 63.333 | 210  | 275 | 482  | 4.54E-66  | Other-NLR | different |
| At_RLP1        | LRR-RLP   | Bvu | snap_masked-Contig7566-processed-gene-0.0-mRNA-1 | 68.263 | 167  | 898 | 1064 | 3.05E-69  | LRR-RLP   | same      |
| At_WRR9        | NL        | Bvu | maker-Contig97-snap-gene-0.50-mRNA-1             | 61.058 | 208  | 17  | 224  | 2.70E-73  | TNL       | different |
| At_RFO3        | Other-RLK | Bvu | maker-Contig412-snap-gene-0.33-mRNA-1            | 63.243 | 185  | 515 | 699  | 3.77E-77  | Other-RLK | same      |
| At_RPP1        | TNL       | Bvu | maker-Contig97-snap-gene-0.50-mRNA-1             | 61.538 | 208  | 97  | 304  | 2.04E-77  | TNL       | same      |
| At_RLM1b       | TNL       | Bvu | maker-Contig97-snap-gene-0.50-mRNA-1             | 65.7   | 207  | 13  | 219  | 1.18E-79  | TNL       | same      |
| At_WRR4a       | TNL       | Bvu | maker-Contig97-snap-gene-0.50-mRNA-1             | 63.084 | 214  | 12  | 225  | 6.74E-80  | TNL       | same      |
| At_RPP8        | CNL       | Bvu | snap_masked-Contig685-processed-gene-0.6-mRNA-1  | 67.308 | 208  | 71  | 278  | 8.61E-86  | NBS       | different |
| At_WRR4b       | TNL       | Bvu | maker-Contig97-snap-gene-0.50-mRNA-1             | 64.706 | 221  | 14  | 234  | 9.48E-87  | TNL       | same      |
| At_RLM1a       | TNL       | Bvu | maker-Contig97-snap-gene-0.50-mRNA-1             | 61.506 | 239  | 13  | 251  | 5.95E-88  | TNL       | same      |
| Bra_Crr1a      | TNL       | Bvu | maker-Contig907-snap-gene-0.24-mRNA-1            | 64.655 | 232  | 40  | 271  | 4.09E-88  | TX        | different |
| At_RLP1        | LRR-RLP   | Bvu | maker-Contig188-snap-gene-0.8-mRNA-1             | 61.798 | 267  | 809 | 1071 | 4.07E-93  | LRR-RLP   | same      |
| At_RPP1        | TNL       | Bvu | maker-Contig907-snap-gene-0.24-mRNA-1            | 69.369 | 222  | 78  | 299  | 8.71E-97  | TX        | different |
| Bju_WRR1       | CNL       | Bvu | snap_masked-Contig3090-processed-gene-0.4-mRNA-1 | 65.587 | 247  | 12  | 253  | 1.01E-101 | CN        | different |
| At_RPP8        | CNL       | Bvu | maker-Contig6075-snap-gene-0.2-mRNA-1            | 72.065 | 247  | 662 | 908  | 4.41E-102 | CNL       | same      |
| At_RLM3        | TN        | Bvu | maker-Contig989-snap-gene-0.30-mRNA-1            | 65.351 | 228  | 9   | 235  | 2.02E-102 | TX        | different |
| At_WRR4a       | TNL       | Bvu | maker-Contig1030-snap-gene-0.15-mRNA-1           | 64.662 | 266  | 1   | 266  | 6.76E-103 | TX        | different |
| At_RPP4        | TNL       | Bvu | maker-Contig989-snap-gene-0.30-mRNA-1            | 69.697 | 231  | 11  | 240  | 1.12E-107 | TX        | different |
| At_RPP2a       | TNL       | Bvu | maker-Contig989-snap-gene-0.30-mRNA-1            | 70     | 230  | 9   | 237  | 1.04E-109 | TX        | different |
| At_RPP5        | TNL       | Bvu | maker-Contig989-snap-gene-0.30-mRNA-1            | 71.368 | 234  | 10  | 242  | 6.44E-110 | TX        | different |
| At_RLM1b       | TNL       | Bvu | maker-Contig1030-snap-gene-0.15-mRNA-1           | 67.857 | 252  | 16  | 267  | 6.30E-110 | TX        | different |
| At_RLM1a       | TNL       | Bvu | maker-Contig1030-snap-gene-0.15-mRNA-1           | 68.539 | 267  | 1   | 267  | 4.20E-115 | TX        | different |
| At_WRR4b       | TNL       | Bvu | maker-Contig1030-snap-gene-0.15-mRNA-1           | 68.657 | 268  | 1   | 268  | 4.07E-116 | TX        | different |
| At_RLP1        | LRR-RLP   | Bvu | maker-Contig173-snap-gene-0.36-mRNA-1            | 67.681 | 263  | 809 | 1071 | 4.64E-118 | LRR-RLP   | same      |
| Bra_Crr1a      | TNL       | Bvu | maker-Contig6921-snap-gene-0.4-mRNA-1            | 64.516 | 279  | 93  | 371  | 5.50E-121 | TN        | different |
| Bol_FocBo1     | TNL       | Bvu | maker-Contig989-snap-gene-0.30-mRNA-1            | 74.236 | 229  | 9   | 237  | 7.55E-122 | TX        | different |
| At_RPP8        | CNL       | Bvu | snap_masked-Contig3090-processed-gene-0.4-mRNA-1 | 77.778 | 252  | 12  | 259  | 9.86E-131 | CN        | different |
| At_RPP4        | TNL       | Bvu | maker-Contig989-snap-gene-0.34-mRNA-1            | 60.959 | 438  | 676 | 1106 | 2.31E-142 | NL        | different |

|                |           |     |                                                   |        |      |     |      |           |           |           |
|----------------|-----------|-----|---------------------------------------------------|--------|------|-----|------|-----------|-----------|-----------|
| At_RPP4        | TNL       | Bvu | maker-Contig989-snap-gene-0.32-mRNA-1             | 61.017 | 413  | 688 | 1092 | 4.11E-144 | TNL       | same      |
| At_RPP1        | TNL       | Bvu | maker-Contig6921-snap-gene-0.4-mRNA-1             | 74.912 | 283  | 118 | 400  | 1.90E-145 | TN        | different |
| At_WRR8        | TNL       | Bvu | maker-Contig6657-snap-gene-0.5-mRNA-1             | 62.57  | 358  | 14  | 354  | 3.25E-149 | TX        | different |
| At_RAC1        | TNL       | Bvu | maker-Contig6657-snap-gene-0.5-mRNA-1             | 63.966 | 358  | 3   | 344  | 3.44E-150 | TX        | different |
| At_RPP1        | TNL       | Bvu | maker-Contig5799-snap-gene-0.3-mRNA-1             | 61.787 | 403  | 96  | 490  | 9.28E-157 | TN        | different |
| At_RLM1a       | TNL       | Bvu | maker-Contig178-snap-gene-0.36-mRNA-1             | 62.085 | 422  | 14  | 433  | 5.58E-158 | Other-NLR | different |
| At_RAC1        | TNL       | Bvu | maker-Contig1769-snap-gene-0.9-mRNA-1             | 61.353 | 414  | 330 | 735  | 8.49E-159 | NL        | different |
| Bra_Crr1a      | TNL       | Bvu | snap_masked-Contig414-processed-gene-0.17-mRNA-1  | 60.396 | 404  | 67  | 460  | 8.75E-160 | TN        | different |
| At_NGR1b       | RNL       | Bvu | maker-Contig374-snap-gene-0.22-mRNA-1             | 61.259 | 413  | 406 | 812  | 5.63E-161 | CNL       | different |
| At_RLM3        | TN        | Bvu | maker-Contig989-snap-gene-0.32-mRNA-1             | 61.374 | 422  | 9   | 422  | 7.97E-163 | TNL       | different |
| Bna_Rlm9/4/7   | Other-RLK | Bvu | maker-Contig85-snap-gene-1.57-mRNA-1              | 69.274 | 358  | 381 | 737  | 4.21E-165 | Other-RLK | same      |
| At_RFO1        | Other-RLK | Bvu | maker-Contig85-snap-gene-1.57-mRNA-1              | 64.416 | 385  | 348 | 731  | 7.31E-167 | Other-RLK | same      |
| At_RPP1        | TNL       | Bvu | maker-Contig900-snap-gene-0.15-mRNA-1             | 64.097 | 454  | 715 | 1163 | 1.67E-168 | NL        | different |
| At_RPP2a       | TNL       | Bvu | maker-Contig715-snap-gene-0.36-mRNA-1             | 66.422 | 408  | 7   | 414  | 2.21E-171 | TNL       | same      |
| At_RPP7        | NL        | Bvu | snap_masked-Contig2505-processed-gene-0.2-mRNA-1  | 60.68  | 412  | 1   | 409  | 1.69E-171 | NBS       | different |
| At_WRR8        | TNL       | Bvu | maker-Contig1769-snap-gene-0.9-mRNA-1             | 63.835 | 412  | 340 | 745  | 7.42E-172 | NL        | different |
| At_NGR1a       | RNL       | Bvu | maker-Contig374-snap-gene-0.22-mRNA-1             | 64.563 | 412  | 404 | 808  | 3.24E-173 | CNL       | different |
| At_RPP1        | TNL       | Bvu | maker-Contig900-snap-gene-0.13-mRNA-1             | 64.086 | 465  | 701 | 1163 | 3.16E-173 | TNL       | same      |
| Bra_Crr1a      | TNL       | Bvu | snap_masked-Contig196-processed-gene-0.21-mRNA-1  | 60.9   | 422  | 67  | 483  | 2.59E-173 | TN        | different |
| At_RFO1        | Other-RLK | Bvu | maker-Contig264-snap-gene-0.42-mRNA-1             | 62.927 | 410  | 350 | 751  | 2.29E-174 | Other-RLK | same      |
| At_BAK1        | LRR-RLK   | Bvu | maker-Contig1644-snap-gene-0.13-mRNA-1            | 78.896 | 308  | 244 | 548  | 1.52E-175 | Other-RLK | different |
| At_RPP2a       | TNL       | Bvu | maker-Contig989-snap-gene-0.32-mRNA-1             | 68.796 | 407  | 8   | 414  | 2.23E-176 | TNL       | same      |
| At_RPP1        | TNL       | Bvu | snap_masked-Contig196-processed-gene-0.21-mRNA-1  | 60.706 | 425  | 94  | 513  | 2.38E-177 | TN        | different |
| At_SOBI1       | LRR-RLK   | Bvu | snap_masked-Contig942-processed-gene-0.20-mRNA-1  | 88.456 | 641  | 1   | 641  | 0         | LRR-RLK   | same      |
| At_RPM1        | NL        | Bvu | snap_masked-Contig376-processed-gene-0.14-mRNA-1  | 85.006 | 887  | 1   | 881  | 0         | NL        | same      |
| At_FLS2        | LRR-RLK   | Bvu | maker-Contig505-snap-gene-0.21-mRNA-1             | 83.029 | 1149 | 1   | 1145 | 0         | LRR-RLK   | same      |
| At_RLP32       | LRR-RLP   | Bvu | maker-Contig428-snap-gene-1.46-mRNA-1             | 82.73  | 857  | 1   | 854  | 0         | LRR-RLP   | same      |
| At_RFO1        | Other-RLK | Bvu | maker-Contig110-snap-gene-1.49-mRNA-1             | 82.205 | 753  | 3   | 751  | 0         | Other-RLK | same      |
| Bna_Rlm9/4/7   | Other-RLK | Bvu | maker-Contig2524-snap-gene-0.16-mRNA-1            | 79.526 | 464  | 344 | 794  | 0         | Other-RLK | same      |
| At_BAK1        | LRR-RLK   | Bvu | maker-Contig303-snap-gene-0.56-mRNA-1             | 79.208 | 606  | 24  | 615  | 0         | LRR-RLK   | same      |
| At_ADR1        | NL        | Bvu | maker-Contig1214-snap-gene-0.17-mRNA-1            | 78.544 | 783  | 3   | 778  | 0         | NL        | same      |
| At_BAK1        | LRR-RLK   | Bvu | maker-Contig1522-snap-gene-0.10-mRNA-1            | 77.521 | 605  | 23  | 615  | 0         | LRR-RLK   | same      |
| At_RPP8        | CNL       | Bvu | maker-Contig4596-snap-gene-0.1-mRNA-1             | 76.54  | 422  | 1   | 420  | 0         | CNL       | same      |
| At_RPP8        | CNL       | Bvu | maker-Contig5728-snap-gene-0.2-mRNA-1             | 76.371 | 474  | 1   | 470  | 0         | CNL       | same      |
| At_RPS4        | TNL       | Bvu | maker-Contig58-snap-gene-0.53-mRNA-1              | 76.261 | 1209 | 1   | 1193 | 0         | TNL       | same      |
| At_NGR1a       | RNL       | Bvu | maker-Contig374-snap-gene-0.21-mRNA-1             | 75.137 | 547  | 1   | 540  | 0         | CNL       | different |
| At_RPP2b       | TNL       | Bvu | maker-Contig287-snap-gene-0.45-mRNA-1             | 74.75  | 1200 | 1   | 1193 | 0         | TNL       | same      |
| Bna_MPK9       | Other-RLK | Bvu | maker-Contig903-snap-gene-0.16-mRNA-1             | 74.359 | 546  | 63  | 591  | 0         | Other-RLK | same      |
| At_RFO3        | Other-RLK | Bvu | maker-Contig110-snap-gene-1.40-mRNA-1             | 74.327 | 892  | 1   | 849  | 0         | Other-RLK | same      |
| At_WRR4b       | TNL       | Bvu | maker-Contig544-snap-gene-0.19-mRNA-1             | 74.17  | 542  | 3   | 534  | 0         | TN        | different |
| At_RPP8        | CNL       | Bvu | maker-Contig183-snap-gene-1.35-mRNA-1             | 73.937 | 541  | 1   | 537  | 0         | CNL       | same      |
| At_WRR8        | TNL       | Bvu | maker-Contig751-snap-gene-0.13-mRNA-1             | 73.714 | 525  | 14  | 534  | 0         | TN        | different |
| At_RFO3        | Other-RLK | Bvu | maker-Contig3131-snap-gene-0.3-mRNA-1             | 73.624 | 872  | 1   | 850  | 0         | Other-RLK | same      |
| At_RPP8        | CNL       | Bvu | maker-Contig2028-snap-gene-0.12-mRNA-1            | 73.319 | 476  | 94  | 564  | 0         | NBS       | different |
| At_RPP8        | CNL       | Bvu | maker-Contig6075-snap-gene-0.2-mRNA-1             | 73.124 | 893  | 1   | 888  | 0         | CNL       | same      |
| At_RPP8        | CNL       | Bvu | maker-Contig892-snap-gene-0.8-mRNA-1              | 72.846 | 917  | 1   | 905  | 0         | CNL       | same      |
| At_RPP8        | CNL       | Bvu | maker-Contig5728-snap-gene-0.3-mRNA-1             | 72.005 | 818  | 1   | 812  | 0         | CNL       | same      |
| At_RPP8        | CNL       | Bvu | maker-Contig3090-snap-gene-0.6-mRNA-1             | 71.927 | 659  | 250 | 908  | 0         | NL        | different |
| At_RFO2        | LRR-RLP   | Bvu | snap_masked-Contig635-processed-gene-0.0-mRNA-1   | 71.111 | 720  | 19  | 737  | 0         | LRR-RLK   | different |
| Bna_MPK9       | Other-RLK | Bvu | maker-Contig60-snap-gene-0.75-mRNA-1              | 70.954 | 482  | 100 | 564  | 0         | Other-RLK | same      |
| At_RAC1        | TNL       | Bvu | maker-Contig751-snap-gene-0.13-mRNA-1             | 70.51  | 529  | 3   | 526  | 0         | TN        | different |
| At_RLP23       | LRR-RLP   | Bvu | snap_masked-Contig1356-processed-gene-0.11-mRNA-1 | 70.159 | 878  | 17  | 890  | 0         | LRR-RLP   | same      |
| At_WRR4b       | TNL       | Bvu | maker-Contig2444-snap-gene-0.5-mRNA-1             | 70.095 | 943  | 165 | 1091 | 0         | NL        | different |
| At_RPP13       | CNL       | Bvu | snap_masked-Contig408-processed-gene-0.13-mRNA-1  | 70.035 | 861  | 1   | 830  | 0         | CNL       | same      |
| At_WRR8        | TNL       | Bvu | maker-Contig753-snap-gene-0.34-mRNA-1             | 69.874 | 1112 | 11  | 1102 | 0         | TNL       | same      |
| At_RLP32       | LRR-RLP   | Bvu | maker-Contig1906-snap-gene-0.12-mRNA-1            | 69.757 | 453  | 397 | 849  | 0         | LRR-RLP   | same      |
| At_RPP39       | CNL       | Bvu | snap_masked-Contig5814-processed-gene-0.1-mRNA-1  | 69.618 | 576  | 305 | 866  | 0         | NL        | different |
| At_RPP39       | CNL       | Bvu | maker-Contig4589-snap-gene-0.4-mRNA-1             | 69.371 | 875  | 1   | 866  | 0         | CNL       | same      |
| At_RPP8        | CNL       | Bvu | maker-Contig1104-snap-gene-0.53-mRNA-1            | 69.358 | 904  | 1   | 899  | 0         | CNL       | same      |
| Bra_Crr1a      | TNL       | Bvu | maker-Contig848-snap-gene-0.13-mRNA-1             | 69.231 | 442  | 64  | 503  | 0         | TN        | different |
| At_WRR4a       | TNL       | Bvu | maker-Contig544-snap-gene-0.19-mRNA-1             | 68.877 | 543  | 1   | 531  | 0         | TN        | different |
| At_RLP32       | LRR-RLP   | Bvu | snap_masked-Contig2365-processed-gene-0.6-mRNA-1  | 68.63  | 883  | 1   | 854  | 0         | LRR-RLP   | same      |
| At_RPP39       | CNL       | Bvu | maker-Contig2932-snap-gene-0.20-mRNA-1            | 68.514 | 848  | 1   | 840  | 0         | CNL       | same      |
| Bna_Rlm9/4/7   | Other-RLK | Bvu | maker-Contig110-snap-gene-1.49-mRNA-1             | 68.123 | 778  | 23  | 794  | 0         | Other-RLK | same      |
| Bna_LepR3/Rlm9 | LRR-RLP   | Bvu | maker-Contig1906-snap-gene-0.12-mRNA-1            | 68.067 | 476  | 474 | 944  | 0         | LRR-RLP   | same      |
| At_WRR8        | TNL       | Bvu | maker-Contig57-snap-gene-0.46-mRNA-1              | 67.985 | 531  | 19  | 543  | 0         | TN        | different |
| At_RPP7        | NL        | Bvu | maker-Contig883-snap-gene-0.14-mRNA-1             | 67.643 | 683  | 190 | 866  | 0         | NL        | same      |
| At_RLP32       | LRR-RLP   | Bvu | maker-Contig4970-snap-gene-0.6-mRNA-1             | 67.595 | 790  | 66  | 853  | 0         | LRR-RLP   | same      |
| At_NGR1a       | RNL       | Bvu | maker-Contig374-snap-gene-0.21-mRNA-1             | 67.233 | 824  | 1   | 807  | 0         | CNL       | different |
| At_RRS1        | TNL       | Bvu | maker-Contig2674-snap-gene-0.6-mRNA-1             | 67.208 | 677  | 8   | 681  | 0         | NL        | different |
| At_RLP42       | LRR-RLP   | Bvu | snap_masked-Contig1356-processed-gene-0.11-mRNA-1 | 66.935 | 871  | 15  | 880  | 0         | LRR-RLP   | same      |
| At_RAC1        | TNL       | Bvu | maker-Contig57-snap-gene-0.46-mRNA-1              | 66.792 | 533  | 9   | 534  | 0         | TN        | different |
| At_WRR8        | TNL       | Bvu | maker-Contig4851-snap-gene-0.8-mRNA-1             | 66.753 | 1155 | 12  | 1130 | 0         | TNL       | same      |
| At_RPP7        | NL        | Bvu | snap_masked-Contig505-processed-gene-0.8-mRNA-1   | 66.744 | 866  | 6   | 866  | 0         | NL        | same      |
| Bra_Crr1a      | TNL       | Bvu | maker-Contig934-snap-gene-0.4-mRNA-1              | 66.731 | 517  | 68  | 584  | 0         | TN        | different |
| At_RAC1        | TNL       | Bvu | maker-Contig753-snap-gene-0.34-mRNA-1             | 66.696 | 1135 | 1   | 1121 | 0         | TNL       | same      |
| At_RPS4        | TNL       | Bvu | maker-Contig58-snap-gene-0.55-mRNA-1              | 66.695 | 1165 | 7   | 1165 | 0         | TNL       | same      |
| At_RPS4        | TNL       | Bvu | maker-Contig2674-snap-gene-0.3-mRNA-1             | 66.608 | 1141 | 4   | 1137 | 0         | TNL       | same      |
| Bju_WRR1       | CNL       | Bvu | maker-Contig183-snap-gene-1.35-mRNA-1             | 66.605 | 542  | 1   | 534  | 0         | CNL       | same      |
| At_RPP39       | CNL       | Bvu | maker-Contig859-snap-gene-0.10-mRNA-1             | 66.364 | 880  | 1   | 870  | 0         | CNL       | same      |
| At_RPS5        | TNL       | Bvu | snap_masked-Contig5921-processed-gene-0.3-mRNA-1  | 66.1   | 882  | 1   | 880  | 0         | CNL       | different |
| At_NGR1b       | RNL       | Bvu | maker-Contig374-snap-gene-0.21-mRNA-1             | 66.093 | 814  | 9   | 812  | 0         | CNL       | different |
| At_RAC1        | TNL       | Bvu | maker-Contig6855-snap-gene-0.3-mRNA-1             | 66.003 | 753  | 9   | 735  | 0         | TNL       | same      |
| At_RLP1        | LRR-RLP   | Bvu | maker-Contig1473-snap-gene-0.20-mRNA-1            | 65.893 | 862  | 216 | 1071 | 0         | LRR-RLP   | same      |
| At_RLM1b       | TNL       | Bvu | maker-Contig1716-snap-gene-0.17-mRNA-1            | 65.882 | 1020 | 1   | 992  | 0         | TNL       | same      |
| At_WRR8        | TNL       | Bvu | maker-Contig6855-snap-gene-0.3-mRNA-1             | 65.796 | 766  | 20  | 755  | 0         | TNL       | same      |

|                |           |     |                                                  |        |      |     |      |           |           |           |
|----------------|-----------|-----|--------------------------------------------------|--------|------|-----|------|-----------|-----------|-----------|
| At_RPP7        | NL        | Bvu | maker-Contig5064-snap-gene-0.1-mRNA-1            | 65.711 | 872  | 4   | 866  | 0         | NL        | same      |
| At_RLM1b       | TNL       | Bvu | snap_masked-Contig3802-processed-gene-0.1-mRNA-1 | 65.396 | 971  | 33  | 972  | 0         | TNL       | same      |
| At_RPS5        | TNL       | Bvu | maker-Contig5921-snap-gene-0.8-mRNA-1            | 65.389 | 887  | 1   | 881  | 0         | CNL       | different |
| At_RRS1        | TNL       | Bvu | maker-Contig58-snap-gene-0.67-mRNA-1             | 65.336 | 1177 | 8   | 1169 | 0         | TNL       | same      |
| At_NGR1b       | RNL       | Bvu | maker-Contig374-snap-gene-0.21-mRNA-1            | 65.28  | 553  | 5   | 546  | 0         | CNL       | different |
| Bju_WRR1       | CNL       | Bvu | maker-Contig4596-snap-gene-0.1-mRNA-1            | 65.248 | 423  | 1   | 413  | 0         | CNL       | same      |
| Bol_FocBo1     | TNL       | Bvu | maker-Contig715-snap-gene-0.36-mRNA-1            | 65.156 | 706  | 8   | 711  | 0         | TNL       | same      |
| Bna_LepR3/Rlm2 | LRR-RLP   | Bvu | maker-Contig4970-snap-gene-0.6-mRNA-1            | 64.896 | 772  | 187 | 950  | 0         | LRR-RLP   | same      |
| Bna_Rlm9/4/7   | Other-RLK | Bvu | maker-Contig264-snap-gene-0.42-mRNA-1            | 64.414 | 444  | 359 | 793  | 0         | Other-RLK | same      |
| Bju_WRR1       | CNL       | Bvu | maker-Contig5728-snap-gene-0.2-mRNA-1            | 64.346 | 474  | 1   | 466  | 0         | CNL       | same      |
| At_RAC1        | TNL       | Bvu | maker-Contig4851-snap-gene-0.8-mRNA-1            | 64.212 | 1168 | 1   | 1148 | 0         | TNL       | same      |
| Bna_LepR3/Rlm2 | LRR-RLP   | Bvu | snap_masked-Contig2399-processed-gene-0.6-mRNA-1 | 64.062 | 960  | 1   | 948  | 0         | LRR-RLP   | same      |
| Bra_Crr1a      | TNL       | Bvu | maker-Contig1103-snap-gene-0.17-mRNA-1           | 63.724 | 521  | 66  | 586  | 0         | TN        | different |
| Bol_FocBo1     | TNL       | Bvu | maker-Contig989-snap-gene-0.32-mRNA-1            | 63.425 | 905  | 6   | 907  | 0         | TNL       | same      |
| At_RPS5        | TNL       | Bvu | maker-Contig3871-snap-gene-0.8-mRNA-1            | 63.33  | 889  | 1   | 883  | 0         | NL        | different |
| At_RPP4        | TNL       | Bvu | maker-Contig715-snap-gene-0.36-mRNA-1            | 63.22  | 677  | 12  | 682  | 0         | TNL       | same      |
| Bra_Crr1a      | TNL       | Bvu | maker-Contig3153-snap-gene-0.3-mRNA-1            | 63.123 | 602  | 68  | 665  | 0         | TNL       | same      |
| At_RPP5        | TNL       | Bvu | maker-Contig715-snap-gene-0.36-mRNA-1            | 62.857 | 700  | 8   | 695  | 0         | TNL       | same      |
| At_RFO1        | Other-RLK | Bvu | maker-Contig382-snap-gene-0.50-mRNA-1            | 62.781 | 755  | 7   | 751  | 0         | Other-RLK | same      |
| At_RLM1a       | TNL       | Bvu | maker-Contig544-snap-gene-0.19-mRNA-1            | 62.731 | 542  | 1   | 532  | 0         | TN        | different |
| At_RPS5        | TNL       | Bvu | snap_masked-Contig4004-processed-gene-0.1-mRNA-1 | 62.606 | 706  | 184 | 883  | 0         | NL        | different |
| At_WRR8        | TNL       | Bvu | maker-Contig180-snap-gene-0.47-mRNA-1            | 62.534 | 734  | 20  | 745  | 0         | TNL       | same      |
| At_RLM1b       | TNL       | Bvu | maker-Contig1442-snap-gene-0.28-mRNA-1           | 62.515 | 851  | 159 | 1000 | 0         | NL        | different |
| At_RPP1        | TNL       | Bvu | maker-Contig900-snap-gene-0.13-mRNA-1            | 62.38  | 832  | 187 | 1001 | 0         | TNL       | same      |
| At_RPP8        | CNL       | Bvu | maker-Contig6075-snap-gene-0.2-mRNA-1            | 62.375 | 598  | 1   | 583  | 0         | CNL       | same      |
| At_PBS1        | Other-RLK | Bvu | snap_masked-Contig159-processed-gene-0.39-mRNA-1 | 62.282 | 517  | 2   | 455  | 0         | Other-RLK | same      |
| Bju_WRR1       | CNL       | Bvu | maker-Contig1104-snap-gene-0.53-mRNA-1           | 62.266 | 909  | 1   | 900  | 0         | CNL       | same      |
| At_RLP1        | LRR-RLP   | Bvu | maker-Contig3997-snap-gene-0.4-mRNA-1            | 62.172 | 838  | 249 | 1071 | 0         | LRR-RLP   | same      |
| At_RLM1a       | TNL       | Bvu | maker-Contig605-snap-gene-0.26-mRNA-1            | 62.105 | 475  | 164 | 636  | 0         | NL        | different |
| At_RLM1a       | TNL       | Bvu | maker-Contig1716-snap-gene-0.17-mRNA-1           | 62.048 | 996  | 16  | 996  | 0         | TNL       | same      |
| At_WRR4a       | TNL       | Bvu | maker-Contig2444-snap-gene-0.5-mRNA-1            | 61.91  | 848  | 163 | 1004 | 0         | NL        | different |
| At_WRR8        | TNL       | Bvu | maker-Contig761-snap-gene-0.17-mRNA-1            | 61.864 | 1159 | 12  | 1138 | 0         | TNL       | same      |
| Bna_LepR3/Rlm2 | LRR-RLP   | Bvu | snap_masked-Contig2365-processed-gene-0.6-mRNA-1 | 61.673 | 801  | 159 | 950  | 0         | LRR-RLP   | same      |
| At_WRR9        | NL        | Bvu | maker-Contig605-snap-gene-0.26-mRNA-1            | 61.555 | 463  | 168 | 627  | 0         | NL        | same      |
| At_ADR1        | NL        | Bvu | maker-Contig522-snap-gene-0.41-mRNA-1            | 61.425 | 814  | 6   | 787  | 0         | NL        | same      |
| Bna_Rlm9/4/7   | Other-RLK | Bvu | maker-Contig1460-snap-gene-0.33-mRNA-1           | 61.423 | 731  | 22  | 738  | 0         | Other-RLK | same      |
| At_WRR8        | TNL       | Bvu | maker-Contig355-snap-gene-0.7-mRNA-1             | 61.392 | 790  | 337 | 1107 | 0         | TNL       | same      |
| Bju_WRR1       | CNL       | Bvu | maker-Contig2028-snap-gene-0.12-mRNA-1           | 61.325 | 468  | 95  | 554  | 0         | NBS       | different |
| At_RAC1        | TNL       | Bvu | maker-Contig180-snap-gene-0.47-mRNA-1            | 61.277 | 736  | 9   | 735  | 0         | TNL       | same      |
| At_WRR8        | TNL       | Bvu | maker-Contig6634-snap-gene-0.2-mRNA-1            | 61.234 | 859  | 19  | 864  | 0         | TNL       | same      |
| At_RFO1        | Other-RLK | Bvu | maker-Contig1460-snap-gene-0.33-mRNA-1           | 61.096 | 712  | 34  | 732  | 0         | Other-RLK | same      |
| At_RPP1        | TNL       | Bvu | maker-Contig900-snap-gene-0.15-mRNA-1            | 61.004 | 777  | 244 | 983  | 0         | NL        | different |
| Bju_WRR1       | CNL       | Bvu | maker-Contig6075-snap-gene-0.2-mRNA-1            | 60.987 | 892  | 1   | 885  | 0         | CNL       | same      |
| At_RLM1b       | TNL       | Bvu | maker-Contig1718-snap-gene-0.2-mRNA-1            | 60.978 | 1043 | 1   | 1001 | 0         | TNL       | same      |
| At_RAC1        | TNL       | Bvu | maker-Contig355-snap-gene-0.7-mRNA-1             | 60.924 | 801  | 327 | 1114 | 0         | TNL       | same      |
| At_RLP30       | LRR-RLP   | Bvu | snap_masked-Contig1346-processed-gene-0.6-mRNA-1 | 60.914 | 788  | 2   | 786  | 0         | LRR-RLP   | same      |
| At_RPP1        | TNL       | Bvu | maker-Contig934-snap-gene-0.4-mRNA-1             | 60.886 | 519  | 94  | 611  | 0         | TN        | different |
| At_RLM1b       | TNL       | Bvu | maker-Contig544-snap-gene-0.19-mRNA-1            | 60.878 | 547  | 1   | 537  | 0         | TN        | different |
| Bju_WRR1       | CNL       | Bvu | maker-Contig892-snap-gene-0.8-mRNA-1             | 60.765 | 915  | 1   | 898  | 0         | CNL       | same      |
| At_RPP39       | CNL       | Bvu | snap_masked-Contig862-processed-gene-0.0-mRNA-1  | 60.701 | 542  | 305 | 837  | 0         | NL        | different |
| At_RLM1b       | TNL       | Bvu | maker-Contig605-snap-gene-0.26-mRNA-1            | 60.465 | 473  | 164 | 634  | 0         | NL        | different |
| At_WRR8        | TNL       | Bvu | maker-Contig7543-snap-gene-0.1-mRNA-1            | 60.36  | 666  | 225 | 885  | 0         | NL        | different |
| At_RLP32       | LRR-RLP   | Bvu | snap_masked-Contig2399-processed-gene-0.6-mRNA-1 | 60.216 | 925  | 1   | 854  | 0         | LRR-RLP   | same      |
| At_RLP42       | LRR-RLP   | Bvu | snap_masked-Contig490-processed-gene-0.28-mRNA-1 | 60.085 | 704  | 182 | 880  | 0         | LRR-RLP   | same      |
| Bna_LepR3/Rlm2 | LRR-RLP   | Bvu | maker-Contig2251-snap-gene-0.3-mRNA-1            | 60.062 | 974  | 1   | 944  | 0         | LRR-RLP   | same      |
| At_RPP5        | TNL       | Bst | Bostr.9638s0056.1.p                              | 66.443 | 149  | 10  | 158  | 1.13E-52  | TNL       | same      |
| At_RPP4        | TNL       | Bst | Bostr.5342s0004.1.p                              | 60.452 | 177  | 13  | 183  | 2.75E-55  | Other-NLR | different |
| At_RPP5        | TNL       | Bst | Bostr.5342s0004.1.p                              | 61.667 | 180  | 12  | 185  | 4.42E-56  | Other-NLR | different |
| Bol_FocBo1     | TNL       | Bst | Bostr.5342s0004.1.p                              | 61.798 | 178  | 10  | 181  | 2.83E-56  | Other-NLR | different |
| At_RPP7        | NL        | Bst | Bostr.10040s0304.1.p                             | 65.497 | 171  | 1   | 170  | 1.09E-61  | NL        | same      |
| At_RPS5        | TNL       | Bst | Bostr.22157s0081.1.p                             | 65.244 | 164  | 362 | 523  | 3.68E-64  | NBS       | different |
| At_RLP30       | LRR-RLP   | Bst | Bostr.15697s0391.1.p                             | 62.371 | 194  | 570 | 760  | 8.02E-69  | LRR-RLP   | same      |
| At_RPP7        | NL        | Bst | Bostr.10040s0329.1.p                             | 61.856 | 194  | 90  | 280  | 4.64E-73  | NBS       | different |
| At_RPP7        | NL        | Bst | Bostr.10040s0305.1.p                             | 64.629 | 229  | 1   | 228  | 3.17E-82  | NL        | same      |
| Bju_WRR1       | CNL       | Bst | Bostr.14419s0022.1.p                             | 60.079 | 253  | 1   | 251  | 3.28E-88  | NL        | different |
| At_RPP2b       | TNL       | Bst | Bostr.2983s0177.1.p                              | 65.432 | 243  | 1   | 240  | 1.79E-89  | TNL       | same      |
| Bra_Crr1a      | TNL       | Bst | Bostr.2983s0062.1.p                              | 70.183 | 218  | 62  | 279  | 5.53E-92  | TX        | different |
| At_RLM1b       | TNL       | Bst | Bostr.29223s0118.1.p                             | 73.214 | 224  | 1   | 224  | 5.12E-102 | TX        | different |
| At_RPP8        | CNL       | Bst | Bostr.14419s0022.1.p                             | 69.141 | 256  | 1   | 256  | 1.55E-105 | NL        | different |
| At_RPP2a       | TNL       | Bst | Bostr.29223s0087.1.p                             | 61.745 | 298  | 117 | 414  | 1.70E-113 | TNL       | same      |
| At_WRR9        | NL        | Bst | Bostr.29223s0118.1.p                             | 80.889 | 225  | 5   | 229  | 1.27E-114 | TX        | different |
| At_RLP30       | LRR-RLP   | Bst | Bostr.15697s0393.1.p                             | 61.159 | 345  | 427 | 769  | 1.01E-119 | LRR-RLP   | same      |
| At_RPS4        | TNL       | Bst | Bostr.18351s0043.1.p                             | 60.59  | 373  | 211 | 572  | 1.28E-131 | NBS       | different |
| At_RPP2a       | TNL       | Bst | Bostr.2983s0178.1.p                              | 68.868 | 318  | 533 | 849  | 4.02E-132 | Other-NLR | different |
| At_WRR4a       | TNL       | Bst | Bostr.8169s0020.1.p                              | 70.227 | 309  | 1   | 309  | 2.43E-138 | TX        | different |
| At_RPP1        | TNL       | Bst | Bostr.29514s0003.1.p                             | 64.921 | 382  | 248 | 613  | 2.14E-150 | Other-NLR | different |
| At_RPP2a       | TNL       | Bst | Bostr.29223s0077.1.p                             | 63.636 | 352  | 10  | 361  | 2.18E-151 | TN        | different |
| At_RPP1        | TNL       | Bst | Bostr.2983s0062.1.p                              | 75.316 | 316  | 1   | 305  | 9.25E-152 | TX        | different |
| At_RLM3        | TN        | Bst | Bostr.29223s0077.1.p                             | 62.393 | 351  | 9   | 359  | 6.18E-154 | TN        | same      |
| At_RPP2a       | TNL       | Bst | Bostr.29223s0076.1.p                             | 65.228 | 417  | 1   | 414  | 3.66E-161 | TNL       | same      |
| At_RPP2a       | TNL       | Bst | Bostr.29223s0089.1.p                             | 63.547 | 406  | 10  | 414  | 5.48E-162 | TNL       | same      |
| At_NGR1b       | RNL       | Bst | Bostr.0568s0113.1.p                              | 62.56  | 414  | 406 | 815  | 3.79E-164 | NL        | different |
| At_RPP1        | TNL       | Bst | Bostr.7200s0011.1.p                              | 60.816 | 490  | 693 | 1156 | 6.66E-166 | Other-NLR | different |
| At_PBS1        | Other-RLK | Bst | Bostr.25219s0162.1.p                             | 68.966 | 319  | 71  | 381  | 1.71E-166 | Other-RLK | same      |
| At_RPP2a       | TNL       | Bst | Bostr.5342s0004.1.p                              | 63.07  | 417  | 1   | 413  | 7.27E-167 | Other-NLR | different |
| At_RPP2a       | TNL       | Bst | Bostr.29223s0095.1.p                             | 65.025 | 406  | 10  | 414  | 1.70E-167 | TNL       | same      |

|          |           |     |                      |        |      |     |      |           |           |           |
|----------|-----------|-----|----------------------|--------|------|-----|------|-----------|-----------|-----------|
| At_WRR4b | TNL       | Bst | Bostr.8169s0020.1.p  | 81.029 | 311  | 4   | 314  | 1.01E-167 | TX        | different |
| At_RPP2a | TNL       | Bst | Bostr.3148s0224.1.p  | 64.029 | 417  | 1   | 413  | 8.16E-168 | Other-NLR | different |
| At_RPP2a | TNL       | Bst | Bostr.29223s0069.1.p | 65.459 | 414  | 1   | 414  | 1.69E-168 | Other-NLR | different |
| At_RPP2a | TNL       | Bst | Bostr.29223s0074.1.p | 62.319 | 414  | 1   | 414  | 1.62E-169 | TN        | different |
| At_RPP2a | TNL       | Bst | Bostr.29223s0096.1.p | 65.111 | 407  | 10  | 414  | 1.22E-170 | TNL       | same      |
| At_RPP8  | CNL       | Bst | Bostr.13671s0460.1.p | 64.16  | 399  | 47  | 445  | 2.16E-172 | NBS       | different |
| At_RLM3  | TN        | Bst | Bostr.29223s0072.1.p | 60.185 | 432  | 9   | 432  | 1.03E-172 | Other-NLR | different |
| At_RPP2a | TNL       | Bst | Bostr.29223s0100.1.p | 64.976 | 414  | 1   | 414  | 7.00E-173 | TNL       | same      |
| At_RPP2a | TNL       | Bst | Bostr.29223s0080.1.p | 65.217 | 414  | 1   | 414  | 6.82E-177 | TNL       | same      |
| At_NGR1a | RNL       | Bst | Bostr.0568s0113.1.p  | 66.423 | 411  | 404 | 809  | 1.39E-177 | NL        | different |
| At_RPP2a | TNL       | Bst | Bostr.29223s0072.1.p | 66.425 | 414  | 1   | 414  | 2.60E-178 | Other-NLR | different |
| At_BAK1  | LRR-RLK   | Bst | Bostr.7867s1189.1.p  | 99.187 | 615  | 1   | 615  | 0         | LRR-RLK   | same      |
| At_FLS2  | LRR-RLK   | Bst | Bostr.8819s0170.1.p  | 89.505 | 1172 | 1   | 1170 | 0         | LRR-RLK   | same      |
| At_SOBR1 | LRR-RLK   | Bst | Bostr.24513s0040.1.p | 89.236 | 641  | 1   | 641  | 0         | LRR-RLK   | same      |
| At_RPS2  | NL        | Bst | Bostr.7867s0427.1.p  | 87.239 | 909  | 1   | 909  | 0         | CNL       | different |
| At_RPS4  | TNL       | Bst | Bostr.25599s0001.2.p | 85.528 | 919  | 34  | 952  | 0         | TNL       | same      |
| At_RPS4  | TNL       | Bst | Bostr.25599s0001.1.p | 84.643 | 1120 | 34  | 1144 | 0         | TNL       | same      |
| At_BAK1  | LRR-RLK   | Bst | Bostr.13083s0025.1.p | 82.391 | 619  | 1   | 615  | 0         | LRR-RLK   | same      |
| At_RPP2b | TNL       | Bst | Bostr.2983s0177.1.p  | 80.858 | 606  | 589 | 1193 | 0         | TNL       | same      |
| At_BAK1  | LRR-RLK   | Bst | Bostr.10273s0172.1.p | 79.504 | 605  | 24  | 615  | 0         | LRR-RLK   | same      |
| At_WRR4b | TNL       | Bst | Bostr.8169s0027.2.p  | 79.266 | 1090 | 1   | 1076 | 0         | TNL       | same      |
| At_WRR4b | TNL       | Bst | Bostr.8169s0027.1.p  | 79.266 | 1090 | 1   | 1076 | 0         | TNL       | same      |
| At_WRR8  | TNL       | Bst | Bostr.28243s0020.1.p | 78.933 | 356  | 12  | 367  | 0         | TNL       | same      |
| At_RPP2a | TNL       | Bst | Bostr.30275s0429.1.p | 78.813 | 859  | 409 | 1257 | 0         | TNL       | same      |
| At_RFO3  | Other-RLK | Bst | Bostr.28625s0088.1.p | 77.586 | 870  | 1   | 850  | 0         | Other-RLK | same      |
| At_BAK1  | LRR-RLK   | Bst | Bostr.1040s0048.1.p  | 76.414 | 619  | 9   | 615  | 0         | LRR-RLK   | same      |
| At_RPP1  | TNL       | Bst | Bostr.29514s0003.1.p | 75.41  | 427  | 67  | 493  | 0         | Other-NLR | different |
| At_WRR9  | NL        | Bst | Bostr.29223s0183.2.p | 75.16  | 624  | 5   | 627  | 0         | TNL       | different |
| At_RLM1b | TNL       | Bst | Bostr.29223s0183.2.p | 74.96  | 627  | 1   | 626  | 0         | TNL       | same      |
| At_WRR4b | TNL       | Bst | Bostr.30057s0091.3.p | 74.648 | 710  | 5   | 713  | 0         | TNL       | same      |
| At_WRR4b | TNL       | Bst | Bostr.30057s0091.2.p | 74.648 | 710  | 5   | 713  | 0         | TNL       | same      |
| At_RLM1b | TNL       | Bst | Bostr.29223s0183.1.p | 74.623 | 729  | 1   | 728  | 0         | TNL       | same      |
| At_WRR9  | NL        | Bst | Bostr.29223s0183.1.p | 74.242 | 726  | 5   | 729  | 0         | TNL       | different |
| At_WRR8  | TNL       | Bst | Bostr.4485s0004.1.p  | 74.232 | 586  | 12  | 593  | 0         | TN        | different |
| At_RAC1  | TNL       | Bst | Bostr.4485s0004.1.p  | 74.106 | 587  | 1   | 582  | 0         | TN        | different |
| At_WRR4a | TNL       | Bst | Bostr.8169s0019.1.p  | 74.087 | 849  | 43  | 890  | 0         | TNL       | same      |
| At_WRR4a | TNL       | Bst | Bostr.30057s0091.3.p | 74.085 | 710  | 3   | 711  | 0         | TNL       | same      |
| At_WRR4a | TNL       | Bst | Bostr.30057s0091.2.p | 74.085 | 710  | 3   | 711  | 0         | TNL       | same      |
| At_RPP39 | CNL       | Bst | Bostr.10040s0071.2.p | 73.542 | 703  | 1   | 698  | 0         | CNL       | same      |
| At_WRR4a | TNL       | Bst | Bostr.30057s0091.1.p | 73.453 | 889  | 3   | 890  | 0         | TNL       | same      |
| At_RPP1  | TNL       | Bst | Bostr.26675s0373.1.p | 73.188 | 414  | 96  | 508  | 0         | Other-NLR | different |
| At_WRR9  | NL        | Bst | Bostr.29223s0198.2.p | 73.161 | 734  | 5   | 733  | 0         | TNL       | different |
| At_WRR9  | NL        | Bst | Bostr.29223s0198.1.p | 73.161 | 734  | 5   | 733  | 0         | TNL       | different |
| At_WRR4b | TNL       | Bst | Bostr.8169s0028.1.p  | 72.748 | 433  | 1   | 433  | 0         | TN        | different |
| At_RAC1  | TNL       | Bst | Bostr.8819s0184.1.p  | 72.598 | 1197 | 1   | 1160 | 0         | TNL       | same      |
| At_RPP8  | CNL       | Bst | Bostr.0556s0548.1.p  | 72.581 | 744  | 150 | 889  | 0         | NL        | different |
| At_RPP39 | CNL       | Bst | Bostr.10040s0071.1.p | 72.562 | 882  | 1   | 870  | 0         | CNL       | same      |
| At_WRR4b | TNL       | Bst | Bostr.30057s0091.1.p | 72.542 | 885  | 5   | 888  | 0         | TNL       | same      |
| At_RPP39 | CNL       | Bst | Bostr.10040s0072.1.p | 72.531 | 881  | 1   | 870  | 0         | CNL       | same      |
| At_WRR4b | TNL       | Bst | Bostr.8169s0018.1.p  | 72.41  | 946  | 159 | 1096 | 0         | NL        | different |
| At_RAC1  | TNL       | Bst | Bostr.4485s0002.1.p  | 72.339 | 1193 | 1   | 1156 | 0         | TNL       | same      |
| At_RPP39 | CNL       | Bst | Bostr.10040s0075.1.p | 72.336 | 882  | 1   | 870  | 0         | CNL       | same      |
| At_RLM1b | TNL       | Bst | Bostr.29223s0155.1.p | 72.111 | 796  | 102 | 876  | 0         | TNL       | same      |
| At_RPP8  | CNL       | Bst | Bostr.0124s0128.1.p  | 72.101 | 914  | 1   | 908  | 0         | CNL       | same      |
| At_RPP39 | CNL       | Bst | Bostr.10040s0099.1.p | 72.022 | 890  | 1   | 869  | 0         | CNL       | same      |
| At_WRR4b | TNL       | Bst | Bostr.8169s0019.1.p  | 71.986 | 846  | 45  | 888  | 0         | TNL       | same      |
| At_RPP39 | CNL       | Bst | Bostr.10040s0079.1.p | 71.919 | 844  | 42  | 874  | 0         | CNL       | same      |
| At_RPM1  | NL        | Bst | Bostr.22252s0330.1.p | 71.875 | 928  | 1   | 926  | 0         | NL        | same      |
| At_WRR9  | NL        | Bst | Bostr.29223s0031.1.p | 71.701 | 629  | 12  | 627  | 0         | TNL       | different |
| At_RPP39 | CNL       | Bst | Bostr.10040s0136.1.p | 71.397 | 895  | 1   | 883  | 0         | CNL       | same      |
| At_RFO2  | LRR-RLP   | Bst | Bostr.10273s0122.1.p | 71.349 | 719  | 19  | 737  | 0         | LRR-RLK   | different |
| At_RAC1  | TNL       | Bst | Bostr.8819s0189.2.p  | 71.309 | 1192 | 1   | 1156 | 0         | TNL       | same      |
| At_RAC1  | TNL       | Bst | Bostr.8819s0189.1.p  | 71.249 | 1193 | 1   | 1157 | 0         | TNL       | same      |
| At_BAK1  | LRR-RLK   | Bst | Bostr.19424s1005.1.p | 71.218 | 476  | 141 | 615  | 0         | LRR-RLK   | same      |
| At_RLP1  | LRR-RLP   | Bst | Bostr.4704s0001.1.p  | 71.209 | 910  | 165 | 1071 | 0         | LRR-RLP   | same      |
| At_RLM1b | TNL       | Bst | Bostr.8169s0059.1.p  | 71.109 | 938  | 3   | 934  | 0         | TNL       | same      |
| At_RPP39 | CNL       | Bst | Bostr.10040s0026.1.p | 71.036 | 618  | 260 | 870  | 0         | NL        | different |
| At_RPP39 | CNL       | Bst | Bostr.10040s0027.1.p | 70.828 | 737  | 145 | 870  | 0         | NL        | different |
| At_RAC1  | TNL       | Bst | Bostr.28243s0042.1.p | 70.593 | 1197 | 1   | 1160 | 0         | TNL       | same      |
| At_RLM1a | TNL       | Bst | Bostr.29223s0208.1.p | 70.588 | 425  | 11  | 433  | 0         | TN        | different |
| At_RPP39 | CNL       | Bst | Bostr.10040s0078.1.p | 70.522 | 882  | 1   | 870  | 0         | CNL       | same      |
| At_WRR8  | TNL       | Bst | Bostr.28243s0042.1.p | 70.364 | 1181 | 12  | 1138 | 0         | TNL       | same      |
| At_RPP7  | NL        | Bst | Bostr.10040s0328.1.p | 70.308 | 714  | 1   | 708  | 0         | NL        | same      |
| At_RLM1b | TNL       | Bst | Bostr.29223s0162.1.p | 70.215 | 1024 | 1   | 1012 | 0         | TNL       | same      |
| At_RAC1  | TNL       | Bst | Bostr.13083s0042.1.p | 70.139 | 1152 | 1   | 1139 | 0         | TNL       | same      |
| At_WRR8  | TNL       | Bst | Bostr.4485s0017.1.p  | 70.079 | 1133 | 12  | 1131 | 0         | TNL       | same      |
| At_WRR8  | TNL       | Bst | Bostr.8819s0189.2.p  | 70.059 | 1179 | 12  | 1138 | 0         | TNL       | same      |
| At_WRR8  | TNL       | Bst | Bostr.8819s0189.1.p  | 70.059 | 1179 | 12  | 1138 | 0         | TNL       | same      |
| At_WRR8  | TNL       | Bst | Bostr.13083s0042.1.p | 69.991 | 1133 | 12  | 1122 | 0         | TNL       | same      |
| At_RPP8  | CNL       | Bst | Bostr.0124s0128.2.p  | 69.869 | 687  | 227 | 908  | 0         | NL        | different |
| At_RLM1b | TNL       | Bst | Bostr.29223s0114.1.p | 69.804 | 1020 | 10  | 1013 | 0         | TNL       | same      |
| At_RLM1b | TNL       | Bst | Bostr.29223s0184.1.p | 69.737 | 988  | 1   | 977  | 0         | TNL       | same      |
| At_WRR8  | TNL       | Bst | Bostr.8819s0184.1.p  | 69.613 | 1188 | 12  | 1138 | 0         | TNL       | same      |
| At_RAC1  | TNL       | Bst | Bostr.28243s0018.2.p | 69.456 | 1195 | 1   | 1149 | 0         | TNL       | same      |
| At_RAC1  | TNL       | Bst | Bostr.28243s0018.1.p | 69.456 | 1195 | 1   | 1149 | 0         | TNL       | same      |
| At_RAC1  | TNL       | Bst | Bostr.4485s0017.1.p  | 68.992 | 1161 | 1   | 1149 | 0         | TNL       | same      |

|              |           |     |                      |        |      |     |      |   |           |           |
|--------------|-----------|-----|----------------------|--------|------|-----|------|---|-----------|-----------|
| At_WRR4a     | TNL       | Bst | Bostr.8169s0021.1.p  | 68.835 | 1030 | 1   | 1004 | 0 | TNL       | same      |
| Bna_Rlm9/4/7 | Other-RLK | Bst | Bostr.26959s0385.1.p | 68.822 | 696  | 100 | 794  | 0 | Other-RLK | same      |
| At_RLM1b     | TNL       | Bst | Bostr.29223s0151.1.p | 68.574 | 1031 | 1   | 1014 | 0 | TNL       | same      |
| At_WRR8      | TNL       | Bst | Bostr.28243s0018.2.p | 68.52  | 1169 | 12  | 1131 | 0 | TNL       | same      |
| At_WRR8      | TNL       | Bst | Bostr.28243s0018.1.p | 68.52  | 1169 | 12  | 1131 | 0 | TNL       | same      |
| At_RPP1      | TNL       | Bst | Bostr.0556s0745.1.p  | 68.421 | 1254 | 1   | 1163 | 0 | Other-NLR | different |
| At_RAC1      | TNL       | Bst | Bostr.28243s0020.1.p | 68.408 | 1168 | 1   | 1149 | 0 | TNL       | same      |
| At_RLM1b     | TNL       | Bst | Bostr.29223s0029.1.p | 68.379 | 1012 | 11  | 1009 | 0 | TNL       | same      |
| At_NGR1a     | RNL       | Bst | Bostr.27102s0001.1.p | 68.283 | 495  | 12  | 501  | 0 | CN        | different |
| At_RAC1      | TNL       | Bst | Bostr.28243s0043.2.p | 68.209 | 1167 | 9   | 1156 | 0 | TNL       | same      |
| At_RAC1      | TNL       | Bst | Bostr.28243s0043.1.p | 68.209 | 1167 | 9   | 1156 | 0 | TNL       | same      |
| Bna_Rlm9/4/7 | Other-RLK | Bst | Bostr.10273s0393.1.p | 68.204 | 802  | 22  | 794  | 0 | Other-RLK | same      |
| At_WRR8      | TNL       | Bst | Bostr.28243s0020.1.p | 68.163 | 735  | 420 | 1131 | 0 | TNL       | same      |
| At_WRR4a     | TNL       | Bst | Bostr.12938s0002.1.p | 68.116 | 897  | 102 | 996  | 0 | TNL       | same      |
| At_RAC1      | TNL       | Bst | Bostr.28243s0018.3.p | 68.095 | 1050 | 146 | 1149 | 0 | NL        | different |
| At_RAC1      | TNL       | Bst | Bostr.28243s0018.4.p | 68.095 | 1050 | 146 | 1149 | 0 | NL        | different |
| At_WRR4a     | TNL       | Bst | Bostr.8169s0030.1.p  | 67.925 | 424  | 325 | 747  | 0 | TNL       | same      |
| At_RRS1      | TNL       | Bst | Bostr.29514s0001.2.p | 67.869 | 1220 | 1   | 1190 | 0 | TNL       | same      |
| At_RLM1b     | TNL       | Bst | Bostr.29223s0160.1.p | 67.682 | 1018 | 1   | 1009 | 0 | TNL       | same      |
| At_WRR8      | TNL       | Bst | Bostr.28243s0043.2.p | 67.509 | 1148 | 19  | 1138 | 0 | TNL       | same      |
| At_WRR8      | TNL       | Bst | Bostr.28243s0043.1.p | 67.509 | 1148 | 19  | 1138 | 0 | TNL       | same      |
| At_RLM1a     | TNL       | Bst | Bostr.29223s0183.2.p | 67.468 | 624  | 1   | 622  | 0 | TNL       | same      |
| At_RLM1b     | TNL       | Bst | Bostr.29223s0031.1.p | 67.353 | 631  | 11  | 626  | 0 | TNL       | same      |
| At_WRR8      | TNL       | Bst | Bostr.4485s0002.1.p  | 67.311 | 1190 | 12  | 1138 | 0 | TNL       | same      |
| At_RPS5      | TNL       | Bst | Bostr.13671s0231.1.p | 67.31  | 881  | 1   | 880  | 0 | CNL       | different |
| At_RPP1      | TNL       | Bst | Bostr.7200s0014.1.p  | 67.145 | 1184 | 58  | 1163 | 0 | Other-NLR | different |
| At_WRR9      | NL        | Bst | Bostr.29223s0147.1.p | 67.136 | 995  | 5   | 987  | 0 | TNL       | different |
| At_RRS1      | TNL       | Bst | Bostr.29514s0001.1.p | 67.095 | 1246 | 1   | 1216 | 0 | TNL       | same      |
| At_RAC1      | TNL       | Bst | Bostr.28243s0017.1.p | 67.048 | 1223 | 9   | 1156 | 0 | TNL       | same      |
| At_RLM1b     | TNL       | Bst | Bostr.29223s0181.1.p | 66.935 | 995  | 1   | 980  | 0 | TNL       | same      |
| At_WRR9      | NL        | Bst | Bostr.29223s0151.1.p | 66.863 | 1020 | 5   | 1009 | 0 | TNL       | different |
| At_RPP39     | CNL       | Bst | Bostr.22157s0136.1.p | 66.793 | 527  | 355 | 870  | 0 | CNL       | same      |
| At_WRR4b     | TNL       | Bst | Bostr.1040s0006.1.p  | 66.607 | 563  | 104 | 624  | 0 | TNL       | same      |
| At_RLM1b     | TNL       | Bst | Bostr.10040s0141.1.p | 66.576 | 739  | 164 | 901  | 0 | NL        | different |
| At_RPP1      | TNL       | Bst | Bostr.18473s0376.1.p | 66.571 | 1041 | 1   | 915  | 0 | Other-NLR | different |
| At_RAC1      | TNL       | Bst | Bostr.8819s0190.1.p  | 66.558 | 1229 | 1   | 1149 | 0 | TNL       | same      |
| At_WRR8      | TNL       | Bst | Bostr.28243s0018.3.p | 66.537 | 1025 | 156 | 1131 | 0 | NL        | different |
| At_WRR8      | TNL       | Bst | Bostr.28243s0018.4.p | 66.537 | 1025 | 156 | 1131 | 0 | NL        | different |
| At_WRR4b     | TNL       | Bst | Bostr.8169s0020.1.p  | 66.425 | 691  | 396 | 1076 | 0 | TX        | different |
| At_WRR9      | NL        | Bst | Bostr.29223s0029.1.p | 66.269 | 1005 | 12  | 1008 | 0 | TNL       | different |
| At_RRS1      | TNL       | Bst | Bostr.8819s0021.1.p  | 66.263 | 1322 | 1   | 1288 | 0 | NL        | different |
| At_WRR9      | NL        | Bst | Bostr.29223s0181.1.p | 66.232 | 998  | 5   | 989  | 0 | TNL       | different |
| At_RLM1b     | TNL       | Bst | Bostr.29223s0121.1.p | 66.223 | 752  | 278 | 1012 | 0 | NL        | different |
| At_WRR9      | NL        | Bst | Bostr.29223s0172.1.p | 66.203 | 1006 | 12  | 1002 | 0 | TNL       | different |
| At_RLP23     | LRR-RLP   | Bst | Bostr.23794s0796.1.p | 66.109 | 717  | 175 | 889  | 0 | LRR-RLP   | same      |
| At_WRR8      | TNL       | Bst | Bostr.28243s0017.1.p | 66.007 | 1212 | 19  | 1138 | 0 | TNL       | same      |
| At_RLM1b     | TNL       | Bst | Bostr.29223s0147.1.p | 65.941 | 1010 | 1   | 990  | 0 | TNL       | same      |
| At_RPP8      | CNL       | Bst | Bostr.30275s0049.1.p | 65.714 | 910  | 1   | 904  | 0 | CNL       | same      |
| At_WRR4a     | TNL       | Bst | Bostr.8169s0027.2.p  | 65.709 | 1009 | 9   | 1004 | 0 | TNL       | same      |
| At_WRR4a     | TNL       | Bst | Bostr.8169s0027.1.p  | 65.709 | 1009 | 9   | 1004 | 0 | TNL       | same      |
| At_RLM1a     | TNL       | Bst | Bostr.29223s0198.2.p | 65.698 | 723  | 1   | 719  | 0 | TNL       | same      |
| At_RLM1a     | TNL       | Bst | Bostr.29223s0198.1.p | 65.698 | 723  | 1   | 719  | 0 | TNL       | same      |
| At_RPP8      | CNL       | Bst | Bostr.30275s0049.2.p | 65.652 | 821  | 1   | 815  | 0 | CNL       | same      |
| At_RPP1      | TNL       | Bst | Bostr.19424s0067.1.p | 65.65  | 492  | 94  | 584  | 0 | TN        | different |
| At_RLP32     | LRR-RLP   | Bst | Bostr.2199s0003.1.p  | 65.638 | 745  | 114 | 854  | 0 | LRR-RLP   | same      |
| At_RPP1      | TNL       | Bst | Bostr.18473s0374.1.p | 65.611 | 1294 | 1   | 1163 | 0 | Other-NLR | different |
| At_WRR9      | NL        | Bst | Bostr.29223s0024.1.p | 65.572 | 1005 | 5   | 995  | 0 | TNL       | different |
| At_RLP23     | LRR-RLP   | Bst | Bostr.23794s0775.1.p | 65.551 | 717  | 175 | 888  | 0 | LRR-RLP   | same      |
| At_WRR8      | TNL       | Bst | Bostr.8819s0190.1.p  | 65.455 | 1210 | 12  | 1131 | 0 | TNL       | same      |
| At_RPP1      | TNL       | Bst | Bostr.26326s0044.1.p | 65.414 | 1064 | 128 | 1161 | 0 | Other-NLR | different |
| At_RPS4      | TNL       | Bst | Bostr.5342s0008.1.p  | 65.405 | 1136 | 9   | 1134 | 0 | TNL       | same      |
| At_WRR8      | TNL       | Bst | Bostr.3148s0208.1.p  | 65.4   | 737  | 45  | 772  | 0 | TNL       | same      |
| At_RPP1      | TNL       | Bst | Bostr.18351s0417.1.p | 65.333 | 1275 | 1   | 1163 | 0 | Other-NLR | different |
| At_RPP1      | TNL       | Bst | Bostr.0556s0496.1.p  | 65.175 | 1117 | 108 | 1160 | 0 | Other-NLR | different |
| At_WRR4b     | TNL       | Bst | Bostr.1040s0084.1.p  | 65.068 | 1022 | 11  | 998  | 0 | TNL       | same      |
| At_WRR9      | NL        | Bst | Bostr.29223s0033.1.p | 65.024 | 1035 | 12  | 1026 | 0 | TNL       | different |
| At_RRS1      | TNL       | Bst | Bostr.5342s0006.1.p  | 64.948 | 1261 | 8   | 1238 | 0 | TNL       | same      |
| At_RFO1      | Other-RLK | Bst | Bostr.7128s0227.1.p  | 64.915 | 761  | 6   | 751  | 0 | Other-RLK | same      |
| At_RPP1      | TNL       | Bst | Bostr.18473s0352.1.p | 64.848 | 825  | 176 | 983  | 0 | Other-NLR | different |
| Bol_FocBo1   | TNL       | Bst | Bostr.29223s0074.1.p | 64.803 | 483  | 8   | 490  | 0 | TN        | different |
| At_WRR9      | NL        | Bst | Bostr.29223s0114.1.p | 64.802 | 983  | 13  | 987  | 0 | TNL       | different |
| At_RAC1      | TNL       | Bst | Bostr.8819s0175.1.p  | 64.777 | 741  | 1   | 735  | 0 | TNL       | same      |
| At_WRR8      | TNL       | Bst | Bostr.8819s0175.1.p  | 64.682 | 739  | 12  | 745  | 0 | TNL       | same      |
| At_WRR4b     | TNL       | Bst | Bostr.12938s0002.1.p | 64.452 | 903  | 104 | 994  | 0 | TNL       | same      |
| At_RPS5      | TNL       | Bst | Bostr.26675s0378.1.p | 64.27  | 890  | 1   | 883  | 0 | CNL       | different |
| At_RLP42     | LRR-RLP   | Bst | Bostr.23794s0796.1.p | 64.256 | 719  | 182 | 889  | 0 | LRR-RLP   | same      |
| At_RPP5      | TNL       | Bst | Bostr.29223s0074.1.p | 64.241 | 481  | 11  | 491  | 0 | TN        | different |
| At_RLP32     | LRR-RLP   | Bst | Bostr.19424s1033.1.p | 64.224 | 928  | 1   | 853  | 0 | LRR-RLP   | same      |
| At_WRR12     | TNL       | Bst | Bostr.3751s0023.1.p  | 64.133 | 1026 | 12  | 1019 | 0 | TNL       | same      |
| At_RLM1a     | TNL       | Bst | Bostr.29223s0183.1.p | 64.065 | 743  | 1   | 741  | 0 | TNL       | same      |
| Bra_Crr1a    | TNL       | Bst | Bostr.25463s0391.2.p | 64.041 | 1079 | 67  | 1044 | 0 | TNL       | same      |
| At_RFO1      | Other-RLK | Bst | Bostr.7128s0228.1.p  | 64.022 | 731  | 7   | 717  | 0 | Other-RLK | same      |
| At_RPP7      | NL        | Bst | Bostr.10040s0323.1.p | 63.936 | 879  | 1   | 865  | 0 | NL        | same      |
| Bju_WRR1     | CNL       | Bst | Bostr.0124s0128.1.p  | 63.916 | 909  | 1   | 900  | 0 | CNL       | same      |
| At_RPP4      | TNL       | Bst | Bostr.29223s0074.1.p | 63.808 | 478  | 12  | 489  | 0 | TN        | different |
| At_RPP7      | NL        | Bst | Bostr.10040s0305.1.p | 63.787 | 544  | 243 | 775  | 0 | NL        | same      |

|                |           |     |                      |        |      |     |      |   |           |           |
|----------------|-----------|-----|----------------------|--------|------|-----|------|---|-----------|-----------|
| At_WRR4b       | TNL       | Bst | Bostr.2983s0178.1.p  | 63.778 | 900  | 160 | 1053 | 0 | Other-NLR | different |
| At_WRR4a       | TNL       | Bst | Bostr.2983s0178.1.p  | 63.754 | 847  | 159 | 1000 | 0 | Other-NLR | different |
| At_RAC1        | TNL       | Bst | Bostr.3148s0208.1.p  | 63.735 | 739  | 34  | 765  | 0 | TNL       | same      |
| Bna_LepR3/Rlm2 | LRR-RLP   | Bst | Bostr.5776s0003.1.p  | 63.674 | 969  | 1   | 947  | 0 | LRR-RLP   | same      |
| At_RLM1b       | TNL       | Bst | Bostr.29223s0172.1.p | 63.672 | 1024 | 11  | 1013 | 0 | TNL       | same      |
| At_RLM1b       | TNL       | Bst | Bostr.29223s0033.1.p | 63.645 | 1026 | 11  | 1008 | 0 | TNL       | same      |
| At_WRR12       | TNL       | Bst | Bostr.3751s0040.1.p  | 63.614 | 797  | 218 | 1010 | 0 | NL        | different |
| At_WRR12       | TNL       | Bst | Bostr.3751s0028.1.p  | 63.559 | 944  | 85  | 1021 | 0 | TNL       | same      |
| At_WRR12       | TNL       | Bst | Bostr.3751s0032.1.p  | 63.434 | 1031 | 12  | 1019 | 0 | TNL       | same      |
| At_RLM1a       | TNL       | Bst | Bostr.29223s0155.1.p | 63.43  | 793  | 102 | 873  | 0 | TNL       | same      |
| At_RAC1        | TNL       | Bst | Bostr.4485s0016.2.p  | 63.4   | 653  | 105 | 735  | 0 | TNL       | same      |
| At_RAC1        | TNL       | Bst | Bostr.4485s0016.1.p  | 63.4   | 653  | 105 | 735  | 0 | TNL       | same      |
| At_RLM1a       | TNL       | Bst | Bostr.30057s0091.3.p | 63.38  | 710  | 4   | 712  | 0 | TNL       | same      |
| At_RLM1a       | TNL       | Bst | Bostr.30057s0091.2.p | 63.38  | 710  | 4   | 712  | 0 | TNL       | same      |
| At_WRR12       | TNL       | Bst | Bostr.3751s0035.1.p  | 63.365 | 1040 | 12  | 1044 | 0 | TNL       | same      |
| At_RPP7        | NL        | Bst | Bostr.25375s0006.2.p | 63.303 | 545  | 254 | 793  | 0 | NL        | same      |
| At_RPS5        | TNL       | Bst | Bostr.13671s0231.3.p | 63.199 | 769  | 112 | 880  | 0 | NL        | different |
| At_RPS5        | TNL       | Bst | Bostr.13671s0231.2.p | 63.199 | 769  | 112 | 880  | 0 | NL        | different |
| At_WRR4a       | TNL       | Bst | Bostr.0124s0150.1.p  | 62.985 | 1005 | 1   | 1004 | 0 | TNL       | same      |
| At_RPP7        | NL        | Bst | Bostr.10040s0017.1.p | 62.971 | 875  | 1   | 866  | 0 | NL        | same      |
| At_WRR9        | NL        | Bst | Bostr.29223s0184.1.p | 62.842 | 1098 | 5   | 1077 | 0 | TNL       | different |
| At_RLM1b       | TNL       | Bst | Bostr.29223s0118.1.p | 62.828 | 495  | 373 | 865  | 0 | TX        | different |
| At_RLM1b       | TNL       | Bst | Bostr.8169s0058.1.p  | 62.745 | 1020 | 1   | 1009 | 0 | TNL       | same      |
| At_RLP42       | LRR-RLP   | Bst | Bostr.23794s0775.1.p | 62.712 | 708  | 182 | 883  | 0 | LRR-RLP   | same      |
| At_WRR8        | TNL       | Bst | Bostr.4485s0016.2.p  | 62.673 | 651  | 116 | 745  | 0 | TNL       | same      |
| At_WRR8        | TNL       | Bst | Bostr.4485s0016.1.p  | 62.673 | 651  | 116 | 745  | 0 | TNL       | same      |
| At_WRR4b       | TNL       | Bst | Bostr.8169s0021.1.p  | 62.579 | 1101 | 4   | 1024 | 0 | TNL       | same      |
| At_RPP1        | TNL       | Bst | Bostr.0556s0798.1.p  | 62.376 | 1111 | 66  | 1163 | 0 | Other-NLR | different |
| Bna_LepR3/Rlm2 | LRR-RLP   | Bst | Bostr.2199s0003.1.p  | 62.37  | 962  | 1   | 947  | 0 | LRR-RLP   | same      |
| Bra_Crr1a      | TNL       | Bst | Bostr.25463s0391.1.p | 62.351 | 1259 | 67  | 1215 | 0 | TNL       | same      |
| At_RPP1        | TNL       | Bst | Bostr.18473s0359.1.p | 62.316 | 1019 | 58  | 1013 | 0 | Other-NLR | different |
| At_RLP42       | LRR-RLP   | Bst | Bostr.23794s0774.1.p | 62.302 | 695  | 182 | 876  | 0 | LRR-RLP   | same      |
| At_WRR4a       | TNL       | Bst | Bostr.8169s0026.1.p  | 62.28  | 851  | 163 | 1004 | 0 | NL        | different |
| At_RLP23       | LRR-RLP   | Bst | Bostr.23794s0774.1.p | 62.256 | 718  | 175 | 890  | 0 | LRR-RLP   | same      |
| At_RLM1b       | TNL       | Bst | Bostr.10040s0058.1.p | 62.241 | 964  | 33  | 981  | 0 | Other-NLR | different |
| At_WRR4a       | TNL       | Bst | Bostr.8169s0018.1.p  | 62.134 | 853  | 157 | 1004 | 0 | NL        | different |
| At_RLM1b       | TNL       | Bst | Bostr.10040s0057.1.p | 62.13  | 1014 | 1   | 997  | 0 | TNL       | same      |
| At_RLP32       | LRR-RLP   | Bst | Bostr.19424s1114.1.p | 62.125 | 866  | 6   | 853  | 0 | LRR-RLP   | same      |
| At_RPP1        | TNL       | Bst | Bostr.2983s0062.1.p  | 62.109 | 768  | 476 | 1163 | 0 | TX        | different |
| At_RPS5        | TNL       | Bst | Bostr.13671s0240.1.p | 62.091 | 794  | 1   | 790  | 0 | CNL       | different |
| At_WRR4b       | TNL       | Bst | Bostr.0124s0150.1.p  | 62.011 | 1074 | 6   | 1075 | 0 | TNL       | same      |
| At_RFO2        | LRR-RLP   | Bst | Bostr.7128s0335.1.p  | 61.98  | 697  | 45  | 740  | 0 | LRR-RLP   | same      |
| At_RPP7        | NL        | Bst | Bostr.10040s0324.1.p | 61.786 | 963  | 1   | 956  | 0 | NL        | same      |
| At_RLM1a       | TNL       | Bst | Bostr.10040s0141.1.p | 61.737 | 737  | 164 | 898  | 0 | NL        | different |
| At_RLM1a       | TNL       | Bst | Bostr.29223s0162.1.p | 61.709 | 995  | 1   | 986  | 0 | TNL       | same      |
| At_RLM1a       | TNL       | Bst | Bostr.29223s0031.1.p | 61.661 | 626  | 12  | 622  | 0 | TNL       | same      |
| At_WRR9        | NL        | Bst | Bostr.29223s0155.1.p | 61.606 | 797  | 106 | 881  | 0 | TNL       | different |
| Bju_WRR1       | CNL       | Bst | Bostr.0124s0128.2.p  | 61.606 | 685  | 222 | 900  | 0 | NL        | different |
| At_RPP7        | NL        | Bst | Bostr.10040s0313.1.p | 61.597 | 526  | 1   | 525  | 0 | NBS       | different |
| At_RPP1        | TNL       | Bst | Bostr.18473s0352.1.p | 61.583 | 518  | 659 | 1163 | 0 | Other-NLR | different |
| At_RLM1b       | TNL       | Bst | Bostr.29223s0024.1.p | 61.508 | 1008 | 1   | 992  | 0 | TNL       | same      |
| At_WRR4b       | TNL       | Bst | Bostr.29223s0183.2.p | 61.502 | 626  | 1   | 624  | 0 | TNL       | same      |
| At_WRR8        | TNL       | Bst | Bostr.4485s0003.1.p  | 61.477 | 745  | 27  | 745  | 0 | TNL       | same      |
| At_RPP7        | NL        | Bst | Bostr.25375s0006.1.p | 61.452 | 799  | 1   | 793  | 0 | NL        | same      |
| At_RLM1a       | TNL       | Bst | Bostr.10040s0227.1.p | 61.438 | 918  | 1   | 915  | 0 | TNL       | same      |
| At_WRR9        | NL        | Bst | Bostr.29223s0160.1.p | 61.35  | 1022 | 5   | 1020 | 0 | TNL       | different |
| At_WRR9        | NL        | Bst | Bostr.10040s0141.1.p | 61.325 | 755  | 168 | 920  | 0 | NL        | same      |
| At_RLP32       | LRR-RLP   | Bst | Bostr.10199s0122.1.p | 61.245 | 707  | 175 | 866  | 0 | LRR-RLP   | same      |
| At_RPP1        | TNL       | Bst | Bostr.7200s0011.1.p  | 61.086 | 884  | 177 | 1001 | 0 | Other-NLR | different |
| At_NGR1b       | RNL       | Bst | Bostr.27102s0001.1.p | 61.044 | 498  | 14  | 503  | 0 | CN        | different |
| At_RLM1a       | TNL       | Bst | Bostr.30057s0091.1.p | 61.036 | 888  | 4   | 889  | 0 | TNL       | same      |
| At_RPP7        | NL        | Bst | Bostr.10040s0300.1.p | 61.027 | 993  | 1   | 977  | 0 | NL        | same      |
| At_RPP7        | NL        | Bst | Bostr.10040s0300.2.p | 61.027 | 993  | 1   | 977  | 0 | NL        | same      |
| At_WRR8        | TNL       | Bst | Bostr.4485s0018.1.p  | 61.02  | 549  | 282 | 751  | 0 | NL        | different |
| At_ADR1        | NL        | Bst | Bostr.14419s0021.1.p | 61.017 | 590  | 179 | 765  | 0 | NL        | same      |
| At_RPP7        | NL        | Bst | Bostr.7200s0186.1.p  | 61.002 | 1018 | 1   | 977  | 0 | CNL       | different |
| At_RFO1        | Other-RLK | Bst | Bostr.7128s0225.1.p  | 60.957 | 648  | 119 | 725  | 0 | Other-RLK | same      |
| At_RPS5        | TNL       | Bst | Bostr.26675s0377.1.p | 60.904 | 885  | 1   | 883  | 0 | CNL       | different |
| At_RLM1a       | TNL       | Bst | Bostr.8169s0019.1.p  | 60.895 | 849  | 44  | 889  | 0 | TNL       | same      |
| At_WRR9        | NL        | Bst | Bostr.29223s0162.1.p | 60.861 | 999  | 5   | 989  | 0 | TNL       | different |
| At_RLP32       | LRR-RLP   | Bst | Bostr.19424s1036.1.p | 60.833 | 840  | 6   | 766  | 0 | LRR-RLP   | same      |
| Bra_Crr1a      | TNL       | Bst | Bostr.18473s0376.1.p | 60.823 | 924  | 70  | 975  | 0 | Other-NLR | different |
| Bra_Crr1a      | TNL       | Bst | Bostr.30057s0025.3.p | 60.806 | 620  | 70  | 688  | 0 | TNL       | same      |
| At_RPP1        | TNL       | Bst | Bostr.30057s0025.3.p | 60.778 | 617  | 98  | 711  | 0 | TNL       | same      |
| Bra_cRa/cRb    | TNL       | Bst | Bostr.25463s0391.2.p | 60.742 | 1159 | 1   | 1152 | 0 | TNL       | same      |
| At_RPP39       | CNL       | Bst | Bostr.10040s0074.1.p | 60.727 | 825  | 1   | 814  | 0 | CNL       | same      |
| At_RPP7        | NL        | Bst | Bostr.10040s0277.1.p | 60.593 | 1147 | 1   | 1136 | 0 | CNL       | different |
| At_RLM1a       | TNL       | Bst | Bostr.10040s0058.1.p | 60.581 | 964  | 33  | 988  | 0 | Other-NLR | different |
| At_RPP1        | TNL       | Bst | Bostr.30057s0025.1.p | 60.567 | 705  | 98  | 799  | 0 | TNL       | same      |
| At_RLM1b       | TNL       | Bst | Bostr.29223s0198.2.p | 60.485 | 1030 | 1   | 1013 | 0 | TNL       | same      |
| At_RLM1b       | TNL       | Bst | Bostr.29223s0198.1.p | 60.485 | 1030 | 1   | 1013 | 0 | TNL       | same      |
| Bra_Crr1a      | TNL       | Bst | Bostr.2570s0295.1.p  | 60.482 | 706  | 92  | 795  | 0 | TNL       | same      |
| At_RPS5        | TNL       | Bst | Bostr.13671s0230.1.p | 60.473 | 888  | 1   | 883  | 0 | CNL       | different |
| At_RLM1a       | TNL       | Bst | Bostr.8169s0059.1.p  | 60.453 | 928  | 3   | 925  | 0 | TNL       | same      |
| At_RPS5        | TNL       | Bst | Bostr.15774s0296.1.p | 60.384 | 886  | 1   | 881  | 0 | CNL       | different |
| Bra_Crr1a      | TNL       | Bst | Bostr.30057s0025.1.p | 60.347 | 691  | 70  | 759  | 0 | TNL       | same      |



|                |         |     |                      |        |      |     |      |           |           |           |
|----------------|---------|-----|----------------------|--------|------|-----|------|-----------|-----------|-----------|
| At_WRR4b       | TNL     | Bst | Bostr.29223s0183.1.p | 60.331 | 726  | 1   | 724  | 0         | TNL       | same      |
| At_WRR9        | NL      | Bst | Bostr.29223s0121.1.p | 60.328 | 731  | 282 | 1001 | 0         | NL        | same      |
| Bra_Crr1a      | TNL     | Bst | Bostr.2570s0335.1.p  | 60.302 | 728  | 92  | 815  | 0         | TNL       | same      |
| Bna_LepR3/Rlm2 | LRR-RLP | Bst | Bostr.18351s0001.1.p | 60.171 | 934  | 25  | 947  | 0         | LRR-RLP   | same      |
| Bju_WRR1       | CNL     | Bst | Bostr.0556s0548.1.p  | 60.16  | 748  | 142 | 886  | 0         | NL        | different |
| At_ADR1        | NL      | Bst | Bostr.7867s1179.1.p  | 60.073 | 819  | 3   | 787  | 0         | NL        | same      |
| At_RLM1a       | TNL     | Bst | Bostr.10040s0057.1.p | 60.04  | 996  | 1   | 988  | 0         | TNL       | same      |
| At_RLM3        | TN      | Cgr | Cagra.1618s0019.1    | 60.39  | 154  | 3   | 152  | 3.10E-55  | TX        | different |
| At_RLM3        | TN      | Cgr | Cagra.1618s0019.1    | 60.39  | 154  | 3   | 152  | 3.10E-55  | TX        | different |
| At_WRR9        | NL      | Cgr | Cagra.1531s0001.1    | 61.333 | 150  | 8   | 157  | 1.91E-60  | TX        | different |
| At_WRR9        | NL      | Cgr | Cagra.1531s0001.1    | 61.333 | 150  | 8   | 157  | 1.91E-60  | TX        | different |
| At_RPP2a       | TNL     | Cgr | Cagra.1618s0019.1    | 64.557 | 158  | 1   | 154  | 2.57E-62  | TX        | different |
| At_RPP2a       | TNL     | Cgr | Cagra.1618s0019.1    | 64.557 | 158  | 1   | 154  | 2.57E-62  | TX        | different |
| At_RLM1b       | TNL     | Cgr | Cagra.1531s0001.1    | 66.667 | 153  | 4   | 156  | 3.48E-66  | TX        | different |
| At_RLM1b       | TNL     | Cgr | Cagra.1531s0001.1    | 66.667 | 153  | 4   | 156  | 3.48E-66  | TX        | different |
| Bol_FocBo1     | TNL     | Cgr | Cagra.1618s0019.1    | 67.901 | 162  | 6   | 163  | 8.06E-68  | TX        | different |
| Bol_FocBo1     | TNL     | Cgr | Cagra.1618s0019.1    | 67.901 | 162  | 6   | 163  | 8.06E-68  | TX        | different |
| At_RPP4        | TNL     | Cgr | Cagra.1618s0019.1    | 75     | 152  | 10  | 157  | 8.09E-70  | TX        | different |
| At_RPP4        | TNL     | Cgr | Cagra.1618s0019.1    | 75     | 152  | 10  | 157  | 8.09E-70  | TX        | different |
| At_RPP1        | TNL     | Cgr | Cagra.1761s0003.1    | 67.63  | 173  | 69  | 241  | 3.89E-73  | TX        | different |
| At_RPP1        | TNL     | Cgr | Cagra.1761s0003.1    | 67.63  | 173  | 69  | 241  | 3.89E-73  | TX        | different |
| At_WRR4a       | TNL     | Cgr | Cagra.1531s0001.1    | 73.377 | 154  | 3   | 156  | 3.33E-75  | TX        | different |
| At_WRR4a       | TNL     | Cgr | Cagra.1531s0001.1    | 73.377 | 154  | 3   | 156  | 3.33E-75  | TX        | different |
| At_WRR4b       | TNL     | Cgr | Cagra.1531s0001.1    | 78.571 | 154  | 5   | 158  | 2.18E-80  | TX        | different |
| At_WRR4b       | TNL     | Cgr | Cagra.1531s0001.1    | 78.571 | 154  | 5   | 158  | 2.18E-80  | TX        | different |
| At_RLM1a       | TNL     | Cgr | Cagra.1531s0001.1    | 77.922 | 154  | 4   | 157  | 6.15E-81  | TX        | different |
| At_RLM1a       | TNL     | Cgr | Cagra.1531s0001.1    | 77.922 | 154  | 4   | 157  | 6.15E-81  | TX        | different |
| At_RPP5        | TNL     | Cgr | Cagra.1618s0019.1    | 84     | 150  | 11  | 160  | 4.73E-82  | TX        | different |
| At_RPP5        | TNL     | Cgr | Cagra.1618s0019.1    | 84     | 150  | 11  | 160  | 4.73E-82  | TX        | different |
| At_RAC1        | TNL     | Cgr | Cagra.0569s0002.1    | 72.085 | 283  | 553 | 832  | 7.98E-117 | TNL       | same      |
| At_RAC1        | TNL     | Cgr | Cagra.0569s0002.1    | 72.085 | 283  | 553 | 832  | 7.98E-117 | TNL       | same      |
| Bna_LepR3/Rlm2 | LRR-RLP | Cgr | Cagra.1655s0067.1    | 65.266 | 357  | 599 | 948  | 5.97E-153 | LRR-RLP   | same      |
| Bra_Crr1a      | TNL     | Cgr | Cagra.4961s0011.1    | 60.253 | 395  | 67  | 460  | 1.01E-161 | TN        | different |
| Bra_Crr1a      | TNL     | Cgr | Cagra.4961s0011.1    | 60.253 | 395  | 67  | 460  | 1.01E-161 | TN        | different |
| At_NGR1b       | RNL     | Cgr | Cagra.2007s0012.1    | 62.319 | 414  | 406 | 815  | 6.37E-162 | NL        | different |
| At_NGR1b       | RNL     | Cgr | Cagra.2007s0012.1    | 62.319 | 414  | 406 | 815  | 6.37E-162 | NL        | different |
| At_RLP32       | LRR-RLP | Cgr | Cagra.1655s0067.1    | 71.307 | 352  | 512 | 853  | 3.83E-168 | LRR-RLP   | same      |
| At_NGR1a       | RNL     | Cgr | Cagra.2007s0012.1    | 65.937 | 411  | 404 | 809  | 1.83E-172 | NL        | different |
| At_NGR1a       | RNL     | Cgr | Cagra.2007s0012.1    | 65.937 | 411  | 404 | 809  | 1.83E-172 | NL        | different |
| At_WRR12       | TNL     | Cgr | Cagra.0824s0126.1    | 86.807 | 1046 | 3   | 1048 | 0         | TNL       | same      |
| At_WRR12       | TNL     | Cgr | Cagra.0824s0126.1    | 86.807 | 1046 | 3   | 1048 | 0         | TNL       | same      |
| At_RPS2        | NL      | Cgr | Cagra.3467s0049.1    | 85.809 | 909  | 1   | 909  | 0         | CNL       | different |
| At_RPS2        | NL      | Cgr | Cagra.3467s0049.1    | 85.809 | 909  | 1   | 909  | 0         | CNL       | different |
| At_RLP32       | LRR-RLP | Cgr | Cagra.2108s0001.1    | 85.698 | 853  | 1   | 852  | 0         | LRR-RLP   | same      |
| At_RLP1        | LRR-RLP | Cgr | Cagra.1671s0360.1    | 85     | 1080 | 1   | 1077 | 0         | LRR-RLP   | same      |
| At_ADR1        | NL      | Cgr | Cagra.6133s0007.1    | 83.692 | 791  | 1   | 787  | 0         | NL        | same      |
| At_ADR1        | NL      | Cgr | Cagra.6133s0007.1    | 83.692 | 791  | 1   | 787  | 0         | NL        | same      |
| At_RLP30       | LRR-RLP | Cgr | Cagra.2179s0052.1    | 83.641 | 758  | 30  | 786  | 0         | LRR-RLP   | same      |
| At_NGR1a       | RNL     | Cgr | Cagra.2007s0011.1    | 82.432 | 814  | 1   | 809  | 0         | CNL       | different |
| At_NGR1a       | RNL     | Cgr | Cagra.2007s0011.1    | 82.432 | 814  | 1   | 809  | 0         | CNL       | different |
| At_RLM1a       | TNL     | Cgr | Cagra.0062s0032.1    | 77.854 | 1025 | 4   | 997  | 0         | TNL       | same      |
| At_RLM1a       | TNL     | Cgr | Cagra.0062s0032.1    | 77.854 | 1025 | 4   | 997  | 0         | TNL       | same      |
| At_RLP42       | LRR-RLP | Cgr | Cagra.16515s0001.1   | 76.633 | 689  | 11  | 698  | 0         | LRR-RLP   | same      |
| At_WRR4b       | TNL     | Cgr | Cagra.12399s0002.1   | 75.549 | 1092 | 11  | 1072 | 0         | TNL       | same      |
| At_WRR4b       | TNL     | Cgr | Cagra.12399s0002.1   | 75.549 | 1092 | 11  | 1072 | 0         | TNL       | same      |
| At_RPP7        | NL      | Cgr | Cagra.0550s0003.2    | 72.184 | 870  | 1   | 866  | 0         | NL        | same      |
| At_RPP7        | NL      | Cgr | Cagra.0550s0003.1    | 72.184 | 870  | 1   | 866  | 0         | NL        | same      |
| At_RPP7        | NL      | Cgr | Cagra.0550s0003.2    | 72.184 | 870  | 1   | 866  | 0         | NL        | same      |
| At_RPP7        | NL      | Cgr | Cagra.0550s0003.1    | 72.184 | 870  | 1   | 866  | 0         | NL        | same      |
| At_RLP23       | LRR-RLP | Cgr | Cagra.0301s0115.1    | 70.857 | 875  | 17  | 890  | 0         | LRR-RLP   | same      |
| At_RPP8        | CNL     | Cgr | Cagra.2383s0008.1    | 70.241 | 914  | 1   | 908  | 0         | CNL       | same      |
| At_RPP8        | CNL     | Cgr | Cagra.2383s0008.1    | 70.241 | 914  | 1   | 908  | 0         | CNL       | same      |
| At_RPP39       | CNL     | Cgr | Cagra.0982s0007.3    | 70.149 | 670  | 214 | 870  | 0         | NL        | different |
| At_RPP39       | CNL     | Cgr | Cagra.0982s0007.1    | 70.149 | 670  | 214 | 870  | 0         | NL        | different |
| At_RPP39       | CNL     | Cgr | Cagra.0982s0007.2    | 70.149 | 670  | 214 | 870  | 0         | NL        | different |
| At_RPP39       | CNL     | Cgr | Cagra.0982s0007.3    | 70.149 | 670  | 214 | 870  | 0         | NL        | different |
| At_RPP39       | CNL     | Cgr | Cagra.0982s0007.1    | 70.149 | 670  | 214 | 870  | 0         | NL        | different |
| At_RPP39       | CNL     | Cgr | Cagra.0982s0007.2    | 70.149 | 670  | 214 | 870  | 0         | NL        | different |
| At_NGR1b       | RNL     | Cgr | Cagra.2007s0011.1    | 69.315 | 818  | 5   | 812  | 0         | CNL       | different |
| At_NGR1b       | RNL     | Cgr | Cagra.2007s0011.1    | 69.315 | 818  | 5   | 812  | 0         | CNL       | different |
| Bna_LepR3/Rlm2 | LRR-RLP | Cgr | Cagra.3457s0001.1    | 68.037 | 657  | 289 | 945  | 0         | LRR-RLP   | same      |
| At_RLP42       | LRR-RLP | Cgr | Cagra.0301s0115.1    | 66.897 | 867  | 19  | 880  | 0         | LRR-RLP   | same      |
| At_RPP1        | TNL     | Cgr | Cagra.26171s0001.1   | 65.804 | 927  | 90  | 938  | 0         | Other-NLR | different |
| At_RPP1        | TNL     | Cgr | Cagra.26171s0001.1   | 65.804 | 927  | 90  | 938  | 0         | Other-NLR | different |
| At_RPP8        | CNL     | Cgr | Cagra.11315s0008.1   | 65.755 | 914  | 1   | 908  | 0         | CNL       | same      |
| At_RPP8        | CNL     | Cgr | Cagra.11315s0008.1   | 65.755 | 914  | 1   | 908  | 0         | CNL       | same      |
| At_RLP23       | LRR-RLP | Cgr | Cagra.16515s0001.1   | 65.449 | 657  | 42  | 697  | 0         | LRR-RLP   | same      |
| At_RPP1        | TNL     | Cgr | Cagra.6251s0001.2    | 64.942 | 1198 | 36  | 1163 | 0         | TNL       | same      |
| At_RPP1        | TNL     | Cgr | Cagra.6251s0001.2    | 64.942 | 1198 | 36  | 1163 | 0         | TNL       | same      |
| At_RPP1        | TNL     | Cgr | Cagra.6251s0001.1    | 64.804 | 1199 | 36  | 1163 | 0         | TNL       | same      |
| At_RPP1        | TNL     | Cgr | Cagra.6251s0001.1    | 64.804 | 1199 | 36  | 1163 | 0         | TNL       | same      |
| At_RLP32       | LRR-RLP | Cgr | Cagra.3457s0001.1    | 64.733 | 655  | 200 | 854  | 0         | LRR-RLP   | same      |
| At_RPS4        | TNL     | Cgr | Cagra.1562s0043.1    | 64.429 | 1147 | 5   | 1139 | 0         | TNL       | same      |
| At_RPS4        | TNL     | Cgr | Cagra.1562s0043.1    | 64.429 | 1147 | 5   | 1139 | 0         | TNL       | same      |
| At_RLM1b       | TNL     | Cgr | Cagra.3285s0010.1    | 64.411 | 857  | 162 | 1006 | 0         | NL        | different |
| At_RLM1b       | TNL     | Cgr | Cagra.3285s0010.1    | 64.411 | 857  | 162 | 1006 | 0         | NL        | different |



|                |         |     |                    |        |      |     |      |          |           |           |
|----------------|---------|-----|--------------------|--------|------|-----|------|----------|-----------|-----------|
| At_RLM1b       | TNL     | Cgr | Cagra.7993s0004.1  | 64.377 | 1019 | 10  | 1009 | 0        | TNL       | same      |
| At_RLM1b       | TNL     | Cgr | Cagra.7993s0004.1  | 64.377 | 1019 | 10  | 1009 | 0        | TNL       | same      |
| At_RPS5        | TNL     | Cgr | Cagra.0568s0138.1  | 64.334 | 886  | 1   | 884  | 0        | CNL       | different |
| At_RPS5        | TNL     | Cgr | Cagra.0568s0138.1  | 64.334 | 886  | 1   | 884  | 0        | CNL       | different |
| At_WRR12       | TNL     | Cgr | Cagra.4715s0008.1  | 64.167 | 1027 | 1   | 1021 | 0        | TNL       | same      |
| At_WRR12       | TNL     | Cgr | Cagra.4715s0008.1  | 64.167 | 1027 | 1   | 1021 | 0        | TNL       | same      |
| At_WRR12       | TNL     | Cgr | Cagra.4715s0010.1  | 63.938 | 1026 | 1   | 1021 | 0        | TNL       | same      |
| At_WRR12       | TNL     | Cgr | Cagra.4715s0010.1  | 63.938 | 1026 | 1   | 1021 | 0        | TNL       | same      |
| At_RLM1b       | TNL     | Cgr | Cagra.7993s0001.1  | 63.84  | 802  | 210 | 1002 | 0        | NL        | different |
| At_RLM1b       | TNL     | Cgr | Cagra.7993s0001.1  | 63.84  | 802  | 210 | 1002 | 0        | NL        | different |
| At_WRR8        | TNL     | Cgr | Cagra.0569s0023.1  | 63.655 | 498  | 14  | 506  | 0        | TN        | different |
| At_WRR8        | TNL     | Cgr | Cagra.0569s0023.1  | 63.655 | 498  | 14  | 506  | 0        | TN        | different |
| Bra_Crr1a      | TNL     | Cgr | Cagra.3601s0001.1  | 63.579 | 475  | 148 | 618  | 0        | TN        | different |
| Bra_Crr1a      | TNL     | Cgr | Cagra.3601s0001.1  | 63.579 | 475  | 148 | 618  | 0        | TN        | different |
| At_WRR8        | TNL     | Cgr | Cagra.0569s0025.1  | 63.32  | 747  | 12  | 739  | 0        | TNL       | same      |
| At_WRR8        | TNL     | Cgr | Cagra.0569s0025.1  | 63.32  | 747  | 12  | 739  | 0        | TNL       | same      |
| At_WRR8        | TNL     | Cgr | Cagra.0569s0002.1  | 63.249 | 1151 | 20  | 1139 | 0        | TNL       | same      |
| At_WRR8        | TNL     | Cgr | Cagra.0569s0002.1  | 63.249 | 1151 | 20  | 1139 | 0        | TNL       | same      |
| At_RPP7        | NL      | Cgr | Cagra.6704s0008.1  | 63.2   | 750  | 126 | 869  | 0        | NL        | same      |
| At_RPP7        | NL      | Cgr | Cagra.6704s0008.1  | 63.2   | 750  | 126 | 869  | 0        | NL        | same      |
| At_RLP23       | LRR-RLP | Cgr | Cagra.0301s0076.1  | 63.194 | 720  | 175 | 889  | 0        | LRR-RLP   | same      |
| Bna_LepR3/Rlm2 | LRR-RLP | Cgr | Cagra.2108s0001.1  | 63.151 | 749  | 204 | 943  | 0        | LRR-RLP   | same      |
| At_RRS1        | TNL     | Cgr | Cagra.1562s0042.1  | 62.941 | 1333 | 8   | 1277 | 0        | TNL       | same      |
| At_RRS1        | TNL     | Cgr | Cagra.1562s0042.1  | 62.941 | 1333 | 8   | 1277 | 0        | TNL       | same      |
| At_RRS1        | TNL     | Cgr | Cagra.1562s0042.2  | 62.913 | 1332 | 8   | 1277 | 0        | TNL       | same      |
| At_RRS1        | TNL     | Cgr | Cagra.1562s0042.2  | 62.913 | 1332 | 8   | 1277 | 0        | TNL       | same      |
| Bju_WRR1       | CNL     | Cgr | Cagra.2383s0008.1  | 62.816 | 909  | 1   | 900  | 0        | CNL       | same      |
| Bju_WRR1       | CNL     | Cgr | Cagra.2383s0008.1  | 62.816 | 909  | 1   | 900  | 0        | CNL       | same      |
| At_RLP32       | LRR-RLP | Cgr | Cagra.8062s0003.1  | 62.784 | 747  | 110 | 852  | 0        | LRR-RLP   | same      |
| At_RPP8        | CNL     | Cgr | Cagra.0053s0020.1  | 62.772 | 873  | 1   | 867  | 0        | NL        | different |
| At_RPP8        | CNL     | Cgr | Cagra.0053s0020.1  | 62.772 | 873  | 1   | 867  | 0        | NL        | different |
| At_RLP23       | LRR-RLP | Cgr | Cagra.0301s0053.1  | 62.762 | 717  | 175 | 890  | 0        | LRR-RLP   | same      |
| At_RAC1        | TNL     | Cgr | Cagra.0569s0023.1  | 62.675 | 501  | 3   | 497  | 0        | TN        | different |
| At_RAC1        | TNL     | Cgr | Cagra.0569s0023.1  | 62.675 | 501  | 3   | 497  | 0        | TN        | different |
| At_ADR1        | NL      | Cgr | Cagra.5249s0010.1  | 62.562 | 812  | 6   | 787  | 0        | NL        | same      |
| At_ADR1        | NL      | Cgr | Cagra.5249s0010.1  | 62.562 | 812  | 6   | 787  | 0        | NL        | same      |
| At_RPP8        | CNL     | Cgr | Cagra.0053s0020.2  | 62.543 | 873  | 1   | 867  | 0        | NL        | different |
| At_RPP8        | CNL     | Cgr | Cagra.0053s0020.2  | 62.543 | 873  | 1   | 867  | 0        | NL        | different |
| At_RLP42       | LRR-RLP | Cgr | Cagra.0301s0053.1  | 62.482 | 701  | 182 | 878  | 0        | LRR-RLP   | same      |
| At_RLP32       | LRR-RLP | Cgr | Cagra.1655s0060.1  | 62.225 | 908  | 1   | 850  | 0        | LRR-RLP   | same      |
| At_RLP42       | LRR-RLP | Cgr | Cagra.0301s0076.1  | 61.986 | 705  | 182 | 878  | 0        | LRR-RLP   | same      |
| At_RLM1b       | TNL     | Cgr | Cagra.7993s0003.1  | 61.919 | 1011 | 1   | 998  | 0        | TNL       | same      |
| At_RLM1b       | TNL     | Cgr | Cagra.7993s0003.1  | 61.919 | 1011 | 1   | 998  | 0        | TNL       | same      |
| At_WRR8        | TNL     | Cgr | Cagra.3954s0001.1  | 61.84  | 739  | 17  | 745  | 0        | TNL       | same      |
| At_WRR8        | TNL     | Cgr | Cagra.3954s0001.2  | 61.84  | 739  | 17  | 745  | 0        | TNL       | same      |
| At_WRR8        | TNL     | Cgr | Cagra.3954s0001.1  | 61.84  | 739  | 17  | 745  | 0        | TNL       | same      |
| At_WRR8        | TNL     | Cgr | Cagra.3954s0001.2  | 61.84  | 739  | 17  | 745  | 0        | TNL       | same      |
| At_RLP23       | LRR-RLP | Cgr | Cagra.0301s0053.2  | 61.714 | 525  | 175 | 698  | 0        | LRR-RLP   | same      |
| At_RAC1        | TNL     | Cgr | Cagra.3954s0001.1  | 61.456 | 742  | 6   | 735  | 0        | TNL       | same      |
| At_RAC1        | TNL     | Cgr | Cagra.3954s0001.1  | 61.456 | 742  | 6   | 735  | 0        | TNL       | same      |
| At_WRR4b       | TNL     | Cgr | Cagra.12399s0001.1 | 61.41  | 1078 | 3   | 1064 | 0        | TNL       | same      |
| At_WRR4b       | TNL     | Cgr | Cagra.12399s0001.1 | 61.41  | 1078 | 3   | 1064 | 0        | TNL       | same      |
| At_WRR4a       | TNL     | Cgr | Cagra.12399s0001.1 | 61.377 | 1002 | 1   | 998  | 0        | TNL       | same      |
| At_WRR4a       | TNL     | Cgr | Cagra.12399s0001.1 | 61.377 | 1002 | 1   | 998  | 0        | TNL       | same      |
| At_RLP42       | LRR-RLP | Cgr | Cagra.0301s0053.2  | 61.079 | 519  | 182 | 696  | 0        | LRR-RLP   | same      |
| Bna_LepR3/Rlm2 | LRR-RLP | Cgr | Cagra.8062s0003.1  | 60.963 | 789  | 156 | 937  | 0        | LRR-RLP   | same      |
| At_RAC1        | TNL     | Cgr | Cagra.0569s0025.1  | 60.705 | 766  | 1   | 741  | 0        | TNL       | same      |
| At_RAC1        | TNL     | Cgr | Cagra.0569s0025.1  | 60.705 | 766  | 1   | 741  | 0        | TNL       | same      |
| At_WRR4a       | TNL     | Cgr | Cagra.12399s0002.1 | 60.624 | 1026 | 9   | 1004 | 0        | TNL       | same      |
| At_WRR4a       | TNL     | Cgr | Cagra.12399s0002.1 | 60.624 | 1026 | 9   | 1004 | 0        | TNL       | same      |
| Bra_Crr1a      | TNL     | Cgr | Cagra.1183s0005.1  | 60.482 | 706  | 85  | 782  | 0        | TNL       | same      |
| Bra_Crr1a      | TNL     | Cgr | Cagra.1183s0005.1  | 60.482 | 706  | 85  | 782  | 0        | TNL       | same      |
| At_RPP39       | CNL     | Bcr | KAF3519034.1       | 60.265 | 151  | 385 | 529  | 1.75E-50 | NL        | different |
| At_WRR9        | NL      | Bcr | KAF3575596.1       | 63.19  | 163  | 106 | 265  | 2.94E-58 | TX        | different |
| At_RPP2a       | TNL     | Bcr | KAF3531620.1       | 63.128 | 179  | 206 | 383  | 1.25E-58 | NL        | different |
| At_WRR8        | TNL     | Bcr | KAF3567523.1       | 61.875 | 160  | 354 | 511  | 4.35E-59 | NBS       | different |
| At_RPP5        | TNL     | Bcr | KAF3531620.1       | 61.957 | 184  | 211 | 394  | 2.76E-59 | NL        | different |
| At_RPM1        | NL      | Bcr | KAF3528544.1       | 60.104 | 193  | 468 | 656  | 4.16E-62 | LRR-RLP   | different |
| At_WRR4b       | TNL     | Bcr | KAF3575596.1       | 66.258 | 163  | 103 | 262  | 4.87E-64 | TX        | different |
| At_WRR4a       | TNL     | Bcr | KAF3564882.1       | 68.354 | 158  | 1   | 157  | 9.28E-66 | TX        | different |
| At_RLM1a       | TNL     | Bcr | KAF3575596.1       | 66.258 | 163  | 102 | 261  | 2.31E-67 | TX        | different |
| At_RLP42       | LRR-RLP | Bcr | KAF3578456.1       | 77.632 | 152  | 725 | 876  | 1.36E-67 | LRR-RLP   | same      |
| At_RLP23       | LRR-RLP | Bcr | KAF3578456.1       | 73.494 | 166  | 725 | 890  | 4.34E-68 | LRR-RLP   | same      |
| Bol_FocBo1     | TNL     | Bcr | KAF3531620.1       | 66.484 | 182  | 206 | 386  | 2.23E-68 | NL        | different |
| At_RLM1b       | TNL     | Bcr | KAF3575596.1       | 69.136 | 162  | 102 | 260  | 1.21E-68 | TX        | different |
| At_RLM1a       | TNL     | Bcr | KAF3564882.1       | 68.354 | 158  | 1   | 158  | 5.59E-69 | TX        | different |
| At_WRR9        | NL      | Bcr | KAF3564882.1       | 69.565 | 161  | 2   | 162  | 3.42E-69 | TX        | different |
| At_RPP13       | CNL     | Bcr | KAF3527235.1       | 75.316 | 158  | 148 | 304  | 3.25E-70 | NL        | different |
| At_RRS1        | TNL     | Bcr | KAF3564691.1       | 69.892 | 186  | 149 | 331  | 9.01E-72 | NL        | different |
| At_WRR4b       | TNL     | Bcr | KAF3564882.1       | 72.956 | 159  | 1   | 159  | 5.90E-73 | TX        | different |
| At_RPS5        | TNL     | Bcr | KAF3517781.1       | 64.767 | 193  | 1   | 193  | 7.11E-75 | CN        | different |
| At_RLM1b       | TNL     | Bcr | KAF3564882.1       | 77.848 | 158  | 1   | 158  | 1.12E-77 | TX        | different |
| At_RLP30       | LRR-RLP | Bcr | KAF3517872.1       | 66.667 | 198  | 580 | 777  | 2.59E-80 | LRR-RLP   | same      |
| At_RLP1        | LRR-RLP | Bcr | KAF3544388.1       | 68.182 | 198  | 880 | 1077 | 1.90E-81 | LRR-RLP   | same      |
| At_RPP2b       | TNL     | Bcr | KAF3532444.1       | 64.167 | 240  | 121 | 360  | 2.51E-84 | Other-NLR | different |
| Bra_Crr1a      | TNL     | Bcr | KAF3550114.1       | 60.311 | 257  | 215 | 471  | 2.37E-85 | NBS       | different |

|                |           |     |              |        |      |      |      |           |           |           |
|----------------|-----------|-----|--------------|--------|------|------|------|-----------|-----------|-----------|
| Bna_LepR3/Rlm2 | LRR-RLP   | Bcr | KAF3548035.1 | 69.898 | 196  | 738  | 932  | 7.65E-89  | LRR-RLP   | same      |
| At_RAC1        | TNL       | Bcr | KAF3567662.1 | 65.401 | 237  | 160  | 396  | 1.43E-89  | NL        | different |
| At_WRR8        | TNL       | Bcr | KAF3567662.1 | 66.087 | 230  | 170  | 399  | 1.14E-91  | NL        | different |
| At_RFO3        | Other-RLK | Bcr | KAF3534109.1 | 60.345 | 232  | 515  | 745  | 9.57E-92  | Other-RLK | same      |
| Bna_LepR3/Rlm2 | LRR-RLP   | Bcr | KAF3551131.1 | 67.265 | 223  | 731  | 950  | 1.45E-96  | LRR-RLP   | same      |
| At_RLP32       | LRR-RLP   | Bcr | KAF3548035.1 | 75.243 | 206  | 649  | 852  | 1.96E-98  | LRR-RLP   | same      |
| At_RPP2a       | TNL       | Bcr | KAF3596196.1 | 65.504 | 258  | 157  | 414  | 1.52E-98  | NL        | different |
| At_RPM1        | NL        | Bcr | KAF3528543.1 | 83.06  | 183  | 132  | 313  | 1.15E-98  | NBS       | different |
| At_RLP32       | LRR-RLP   | Bcr | KAF3551131.1 | 70.852 | 223  | 648  | 868  | 1.51E-103 | LRR-RLP   | same      |
| Bna_Rlm9/4/7   | Other-RLK | Bcr | KAF3518354.1 | 67.537 | 268  | 97   | 361  | 3.66E-106 | Other-RLK | same      |
| At_RPP2a       | TNL       | Bcr | KAF3578478.1 | 78.39  | 236  | 1065 | 1299 | 2.12E-106 | TNL       | same      |
| At_RPP2a       | TNL       | Bcr | KAF3596191.1 | 65.799 | 269  | 147  | 414  | 6.88E-111 | NL        | different |
| At_RLP42       | LRR-RLP   | Bcr | KAF3551685.1 | 66.066 | 333  | 544  | 875  | 2.40E-134 | LRR-RLP   | same      |
| At_RFO1        | Other-RLK | Bcr | KAF3518354.1 | 67.879 | 330  | 433  | 750  | 1.66E-138 | Other-RLK | same      |
| At_RLP23       | LRR-RLP   | Bcr | KAF3551685.1 | 67.976 | 331  | 544  | 874  | 2.26E-141 | LRR-RLP   | same      |
| At_NGR1b       | RNL       | Bcr | KAF3562989.1 | 60.766 | 418  | 406  | 815  | 2.58E-149 | CNL       | different |
| At_RLP1        | LRR-RLP   | Bcr | KAF3497647.1 | 63.728 | 397  | 567  | 959  | 1.44E-154 | LRR-RLP   | same      |
| At_RFO1        | Other-RLK | Bcr | KAF3611901.1 | 64.602 | 339  | 326  | 662  | 3.46E-155 | Other-RLK | same      |
| At_PBS1        | Other-RLK | Bcr | KAF3550268.1 | 63.235 | 340  | 71   | 408  | 4.37E-156 | Other-RLK | same      |
| Bra_Crr1a      | TNL       | Bcr | KAF3611543.1 | 64.456 | 377  | 67   | 441  | 3.64E-159 | TN        | different |
| At_NGR1a       | RNL       | Bcr | KAF3562989.1 | 62.884 | 423  | 396  | 809  | 1.79E-159 | CNL       | different |
| At_RPP1        | TNL       | Bcr | KAF3611543.1 | 61.905 | 378  | 94   | 469  | 3.11E-161 | TN        | different |
| At_NGR1b       | RNL       | Bcr | KAF3597564.1 | 63.814 | 409  | 423  | 800  | 9.24E-162 | CNL       | different |
| At_NGR1a       | RNL       | Bcr | KAF3597564.1 | 64.461 | 408  | 421  | 794  | 3.56E-162 | CNL       | different |
| Bna_Rlm9/4/7   | Other-RLK | Bcr | KAF3611901.1 | 69.806 | 361  | 344  | 695  | 1.82E-169 | Other-RLK | same      |
| At_RFO1        | Other-RLK | Bcr | KAF3518354.1 | 64.198 | 405  | 355  | 747  | 7.15E-170 | Other-RLK | same      |
| Bra_cRa/cRb    | TNL       | Bcr | KAF3611543.1 | 60.465 | 430  | 74   | 501  | 2.18E-170 | TN        | different |
| At_NGR1b       | RNL       | Bcr | KAF3562989.1 | 67.133 | 429  | 192  | 593  | 3.91E-174 | CNL       | different |
| Bra_Crr1a      | TNL       | Bcr | KAF3611543.1 | 64.12  | 432  | 67   | 496  | 8.17E-178 | TN        | different |
| Bol_FocBo1     | TNL       | Bcr | KAF3596191.1 | 98.897 | 816  | 146  | 961  | 0         | NL        | different |
| Bna_Rlm9/4/7   | Other-RLK | Bcr | KAF3518354.1 | 96.979 | 331  | 464  | 794  | 0         | Other-RLK | same      |
| At_BAK1        | LRR-RLK   | Bcr | KAF3593886.1 | 94.976 | 617  | 1    | 615  | 0         | LRR-RLK   | same      |
| At_BAK1        | LRR-RLK   | Bcr | KAF3542856.1 | 94.595 | 518  | 98   | 615  | 0         | LRR-RLK   | same      |
| Bna_Rlm9/4/7   | Other-RLK | Bcr | KAF3518354.1 | 89.731 | 409  | 384  | 792  | 0         | Other-RLK | same      |
| Bna_LepR3/Rlm2 | LRR-RLP   | Bcr | KAF3565783.1 | 87.762 | 572  | 379  | 950  | 0         | LRR-RLP   | same      |
| At_RPS2        | NL        | Bcr | KAF3531089.1 | 83.956 | 910  | 1    | 909  | 0         | CNL       | different |
| Bju_WRR1       | CNL       | Bcr | KAF3578869.1 | 82.834 | 501  | 406  | 904  | 0         | NL        | different |
| At_SOBR1       | LRR-RLK   | Bcr | KAF3549886.1 | 80.989 | 647  | 1    | 641  | 0         | LRR-RLK   | same      |
| At_SOBR1       | LRR-RLK   | Bcr | KAF3576067.1 | 80.871 | 643  | 1    | 641  | 0         | LRR-RLK   | same      |
| At_RFO1        | Other-RLK | Bcr | KAF3516545.1 | 80.531 | 452  | 27   | 470  | 0         | Other-RLK | same      |
| At_FLS2        | LRR-RLK   | Bcr | KAF3565146.1 | 80.102 | 1176 | 1    | 1173 | 0         | LRR-RLK   | same      |
| At_RFO2        | LRR-RLP   | Bcr | KAF3495711.1 | 79.383 | 519  | 222  | 740  | 0         | LRR-RLP   | same      |
| At_BAK1        | LRR-RLK   | Bcr | KAF3516952.1 | 79.333 | 600  | 30   | 615  | 0         | LRR-RLK   | same      |
| At_RPM1        | NL        | Bcr | KAF3528549.1 | 79.211 | 938  | 1    | 926  | 0         | NL        | same      |
| At_BAK1        | LRR-RLK   | Bcr | KAF3520244.1 | 79     | 600  | 30   | 615  | 0         | LRR-RLK   | same      |
| Bna_Rlm9/4/7   | Other-RLK | Bcr | KAF3518354.1 | 78.995 | 657  | 1    | 655  | 0         | Other-RLK | same      |
| At_BAK1        | LRR-RLK   | Bcr | KAF3597752.1 | 78.824 | 595  | 22   | 615  | 0         | LRR-RLK   | same      |
| At_RPP2b       | TNL       | Bcr | KAF3532444.1 | 78.493 | 730  | 465  | 1193 | 0         | Other-NLR | different |
| At_RPS5        | TNL       | Bcr | KAF3496083.1 | 78.356 | 730  | 1    | 730  | 0         | NL        | different |
| At_BAK1        | LRR-RLK   | Bcr | KAF3543401.1 | 77.796 | 608  | 10   | 615  | 0         | LRR-RLK   | same      |
| At_WRR12       | TNL       | Bcr | KAF3498111.1 | 77.732 | 723  | 340  | 1049 | 0         | NL        | different |
| At_NGR1a       | RNL       | Bcr | KAF3562989.1 | 76.765 | 779  | 1    | 771  | 0         | CNL       | different |
| At_SOBR1       | LRR-RLK   | Bcr | KAF3576064.1 | 76.361 | 643  | 1    | 641  | 0         | LRR-RLK   | same      |
| At_RPS4        | TNL       | Bcr | KAF3564697.1 | 76.096 | 753  | 441  | 1192 | 0         | NL        | different |
| At_NGR1a       | RNL       | Bcr | KAF3562989.1 | 75.878 | 427  | 190  | 587  | 0         | CNL       | different |
| At_RFO3        | Other-RLK | Bcr | KAF3609633.1 | 75.846 | 857  | 18   | 850  | 0         | Other-RLK | same      |
| At_RPP2a       | TNL       | Bcr | KAF3532444.1 | 72.937 | 824  | 479  | 1300 | 0         | Other-NLR | different |
| At_RPP2b       | TNL       | Bcr | KAF3593075.1 | 71.784 | 1166 | 13   | 1175 | 0         | TNL       | same      |
| At_RLP23       | LRR-RLP   | Bcr | KAF3575513.1 | 68.694 | 888  | 1    | 882  | 0         | LRR-RLP   | same      |
| Bra_Crr1a      | TNL       | Bcr | KAF3544173.1 | 68.598 | 656  | 220  | 874  | 0         | NL        | different |
| At_RLP23       | LRR-RLP   | Bcr | KAF3580346.1 | 68.127 | 822  | 1    | 820  | 0         | LRR-RLP   | same      |
| At_RLP42       | LRR-RLP   | Bcr | KAF3580346.1 | 68     | 825  | 1    | 822  | 0         | LRR-RLP   | same      |
| At_RLP42       | LRR-RLP   | Bcr | KAF3575513.1 | 67.95  | 883  | 1    | 876  | 0         | LRR-RLP   | same      |
| Bna_MPK9       | Other-RLK | Bcr | KAF3609513.1 | 67.925 | 583  | 55   | 591  | 0         | Other-RLK | same      |
| At_RFO2        | LRR-RLP   | Bcr | KAF3605889.1 | 67.806 | 702  | 41   | 740  | 0         | LRR-RLP   | same      |
| At_RFO2        | LRR-RLP   | Bcr | KAF3518269.1 | 67.733 | 719  | 20   | 737  | 0         | LRR-RLK   | different |
| Bna_Rlm9/4/7   | Other-RLK | Bcr | KAF3516545.1 | 67.651 | 779  | 25   | 794  | 0         | Other-RLK | same      |
| At_RFO2        | LRR-RLP   | Bcr | KAF3497769.1 | 67.651 | 711  | 29   | 737  | 0         | LRR-RLP   | same      |
| At_RPP2a       | TNL       | Bcr | KAF3528035.1 | 67.545 | 835  | 472  | 1300 | 0         | TNL       | same      |
| At_RLM1b       | TNL       | Bcr | KAF3606819.1 | 66.197 | 852  | 164  | 1005 | 0         | NL        | different |
| At_RFO1        | Other-RLK | Bcr | KAF3498694.1 | 65.931 | 725  | 7    | 719  | 0         | Other-RLK | same      |
| At_RLP23       | LRR-RLP   | Bcr | KAF3576309.1 | 65.576 | 703  | 182  | 881  | 0         | LRR-RLP   | same      |
| Bju_WRR1       | CNL       | Bcr | KAF3596471.1 | 65.533 | 647  | 285  | 901  | 0         | CNL       | same      |
| At_NGR1b       | RNL       | Bcr | KAF3562989.1 | 65.184 | 787  | 3    | 777  | 0         | CNL       | different |
| At_RLP32       | LRR-RLP   | Bcr | KAF3532641.1 | 64.56  | 728  | 114  | 840  | 0         | LRR-RLP   | same      |
| At_RPP2b       | TNL       | Bcr | KAF3578478.1 | 64.531 | 1108 | 134  | 1193 | 0         | TNL       | same      |
| At_RLP32       | LRR-RLP   | Bcr | KAF3532638.1 | 64.459 | 740  | 114  | 852  | 0         | LRR-RLP   | same      |
| At_RLP32       | LRR-RLP   | Bcr | KAF3565783.1 | 64.374 | 567  | 292  | 853  | 0         | LRR-RLP   | same      |
| At_RLP1        | LRR-RLP   | Bcr | KAF3497651.1 | 64.326 | 527  | 559  | 1076 | 0         | LRR-RLP   | same      |
| At_RPS5        | TNL       | Bcr | KAF3611428.1 | 64.129 | 591  | 1    | 590  | 0         | CNL       | different |
| At_RFO1        | Other-RLK | Bcr | KAF3498700.1 | 64.095 | 713  | 1    | 696  | 0         | Other-RLK | same      |
| Bna_Rlm9/4/7   | Other-RLK | Bcr | KAF3549501.1 | 63.359 | 786  | 21   | 793  | 0         | Other-RLK | same      |
| At_RFO3        | Other-RLK | Bcr | KAF3544714.1 | 63.14  | 879  | 74   | 850  | 0         | Other-RLK | same      |
| At_RLP42       | LRR-RLP   | Bcr | KAF3576309.1 | 62.817 | 710  | 182  | 888  | 0         | LRR-RLP   | same      |
| At_RLP30       | LRR-RLP   | Bcr | KAF3546057.1 | 62.252 | 453  | 323  | 772  | 0         | LRR-RLP   | same      |
| At_RPP13       | CNL       | Bcr | KAF3560565.1 | 61.687 | 569  | 205  | 755  | 0         | NL        | different |

|                |           |     |              |        |      |     |      |           |           |           |
|----------------|-----------|-----|--------------|--------|------|-----|------|-----------|-----------|-----------|
| At_RFO1        | Other-RLK | Bcr | KAF3498693.1 | 61.518 | 764  | 1   | 751  | 0         | Other-RLK | same      |
| Bra_Crr1a      | TNL       | Bcr | KAF3542303.1 | 61.139 | 790  | 220 | 975  | 0         | NL        | different |
| At_RLM1b       | TNL       | Bcr | KAF3564885.1 | 61.136 | 669  | 347 | 999  | 0         | NL        | different |
| Bju_WRR1       | CNL       | Bcr | KAF3596471.1 | 60.976 | 492  | 1   | 471  | 0         | CNL       | same      |
| Bna_LepR3/Rlm2 | LRR-RLP   | Bcr | KAF3532638.1 | 60.761 | 762  | 176 | 937  | 0         | LRR-RLP   | same      |
| Bna_LepR3/Rlm2 | LRR-RLP   | Bcr | KAF3532641.1 | 60.618 | 518  | 201 | 718  | 0         | LRR-RLP   | same      |
| Bna_LepR3/Rlm2 | LRR-RLP   | Bcr | KAF3532641.1 | 60.54  | 778  | 152 | 927  | 0         | LRR-RLP   | same      |
| At_RPS5        | TNL       | Bcr | KAF3498255.1 | 60.36  | 888  | 1   | 883  | 0         | NL        | different |
| At_RPS5        | TNL       | Bcr | KAF3497592.1 | 60.289 | 554  | 1   | 552  | 0         | CNL       | different |
| At_RPP7        | NL        | Cbp | Cbp19077     | 62.5   | 152  | 575 | 723  | 3.63E-48  | NL        | same      |
| Bol_FocBo1     | TNL       | Cbp | Cbp34462     | 62.162 | 148  | 7   | 154  | 2.79E-50  | TNL       | same      |
| At_RAC1        | TNL       | Cbp | Cbp34462     | 66.443 | 149  | 9   | 154  | 8.85E-54  | TNL       | same      |
| At_WRR8        | TNL       | Cbp | Cbp34462     | 67.114 | 149  | 19  | 164  | 8.41E-57  | TNL       | same      |
| At_RPP13       | CNL       | Cbp | Cbp11721     | 60.406 | 197  | 646 | 834  | 1.03E-60  | NL        | different |
| At_RPP7        | NL        | Cbp | Cbp13283     | 65.294 | 170  | 1   | 169  | 4.68E-62  | NBS       | different |
| At_RFO3        | Other-RLK | Cbp | Cbp14207     | 60.326 | 184  | 510 | 693  | 1.24E-70  | Other-RLK | same      |
| At_RLP30       | LRR-RLP   | Cbp | Cbp2531      | 66.279 | 172  | 604 | 775  | 1.69E-74  | LRR-RLP   | same      |
| Bol_FocBo1     | TNL       | Cbp | Cbp34461     | 60.256 | 234  | 5   | 238  | 4.66E-80  | TNL       | same      |
| At_RAC1        | TNL       | Cbp | Cbp34461     | 68.201 | 239  | 3   | 238  | 4.93E-92  | TNL       | same      |
| At_RFO3        | Other-RLK | Cbp | Cbp22874     | 60.606 | 231  | 515 | 745  | 2.03E-93  | Other-RLK | same      |
| At_WRR8        | TNL       | Cbp | Cbp34461     | 67.47  | 249  | 9   | 254  | 1.74E-97  | TNL       | same      |
| At_RPP1        | TNL       | Cbp | Cbp13366     | 63.306 | 248  | 94  | 341  | 4.55E-106 | TN        | different |
| At_WRR4b       | TNL       | Cbp | Cbp19430     | 63.424 | 257  | 14  | 269  | 7.98E-109 | TN        | different |
| At_RLM1b       | TNL       | Cbp | Cbp19430     | 64.591 | 257  | 13  | 268  | 3.48E-109 | TN        | different |
| At_NGR1b       | RNL       | Cbp | Cbp33510     | 64.982 | 277  | 539 | 815  | 3.17E-109 | NL        | different |
| At_RPP2a       | TNL       | Cbp | Cbp10076     | 60.692 | 318  | 98  | 414  | 5.46E-111 | TNL       | same      |
| At_RLM1a       | TNL       | Cbp | Cbp19430     | 64.202 | 257  | 13  | 268  | 1.78E-111 | TN        | different |
| At_NGR1a       | RNL       | Cbp | Cbp33510     | 66.787 | 277  | 533 | 809  | 2.95E-112 | NL        | different |
| At_RPP2a       | TNL       | Cbp | Cbp2517      | 61.635 | 318  | 98  | 414  | 6.88E-114 | TNL       | same      |
| At_NGR1b       | RNL       | Cbp | Cbp28794     | 66.426 | 277  | 539 | 815  | 1.48E-118 | NL        | different |
| At_NGR1a       | RNL       | Cbp | Cbp28794     | 67.509 | 277  | 533 | 809  | 1.01E-119 | NL        | different |
| Bju_WRR1       | CNL       | Cbp | Cbp47817     | 61.728 | 324  | 1   | 312  | 1.23E-127 | CN        | different |
| Bju_WRR1       | CNL       | Cbp | Cbp47816     | 61.728 | 324  | 1   | 312  | 1.23E-127 | CN        | different |
| At_RLP30       | LRR-RLP   | Cbp | Cbp5067      | 78.626 | 262  | 15  | 273  | 1.22E-130 | LRR-RLP   | same      |
| At_WRR9        | NL        | Cbp | Cbp13417     | 60.247 | 405  | 13  | 416  | 5.36E-147 | Other-NLR | different |
| At_RLM3        | TN        | Cbp | Cbp49279     | 60.448 | 402  | 58  | 450  | 6.31E-155 | TNL       | different |
| At_RLM3        | TN        | Cbp | Cbp45527     | 60.448 | 402  | 58  | 450  | 6.31E-155 | TNL       | different |
| At_RPP8        | CNL       | Cbp | Cbp47817     | 75.817 | 306  | 1   | 306  | 1.07E-155 | CN        | different |
| At_RPP8        | CNL       | Cbp | Cbp47816     | 75.817 | 306  | 1   | 306  | 1.07E-155 | CN        | different |
| At_RPP2a       | TNL       | Cbp | Cbp49279     | 68.245 | 359  | 56  | 414  | 4.87E-159 | TNL       | same      |
| At_RPP2a       | TNL       | Cbp | Cbp45527     | 68.245 | 359  | 56  | 414  | 4.87E-159 | TNL       | same      |
| Bna_Rlm9/4/7   | Other-RLK | Cbp | Cbp23249     | 69.591 | 342  | 395 | 735  | 6.89E-165 | Other-RLK | same      |
| At_RLM1b       | TNL       | Cbp | Cbp13417     | 62.651 | 415  | 10  | 424  | 1.40E-166 | Other-NLR | different |
| Bna_Rlm9/4/7   | Other-RLK | Cbp | Cbp41731     | 69.477 | 344  | 395 | 737  | 2.06E-167 | Other-RLK | same      |
| At_RLM1a       | TNL       | Cbp | Cbp13417     | 63.438 | 413  | 12  | 424  | 3.49E-168 | Other-NLR | different |
| At_RPP13       | CNL       | Cbp | Cbp11721     | 70.492 | 366  | 227 | 574  | 1.88E-171 | NL        | different |
| At_WRR4b       | TNL       | Cbp | Cbp13132     | 61.268 | 426  | 63  | 485  | 6.06E-173 | TNL       | same      |
| At_WRR4a       | TNL       | Cbp | Cbp13417     | 65.7   | 414  | 8   | 421  | 7.03E-178 | Other-NLR | different |
| At_BAK1        | LRR-RLK   | Cbp | Cbp38634     | 98.537 | 615  | 1   | 615  | 0         | LRR-RLK   | same      |
| At_FLS2        | LRR-RLK   | Cbp | Cbp34449     | 89.316 | 1170 | 1   | 1167 | 0         | LRR-RLK   | same      |
| At_SOBR1       | LRR-RLK   | Cbp | Cbp6725      | 88.509 | 644  | 1   | 641  | 0         | LRR-RLK   | same      |
| At_FLS2        | LRR-RLK   | Cbp | Cbp26999     | 88.13  | 1171 | 1   | 1167 | 0         | LRR-RLK   | same      |
| At_RFO1        | Other-RLK | Cbp | Cbp27992     | 87.203 | 758  | 1   | 751  | 0         | Other-RLK | same      |
| At_RFO1        | Other-RLK | Cbp | Cbp9961      | 86.508 | 756  | 1   | 751  | 0         | Other-RLK | same      |
| At_RLP1        | LRR-RLP   | Cbp | Cbp34170     | 86.124 | 1081 | 1   | 1077 | 0         | LRR-RLP   | same      |
| At_RLP1        | LRR-RLP   | Cbp | Cbp36183     | 85.939 | 1081 | 1   | 1077 | 0         | LRR-RLP   | same      |
| At_RLP1        | LRR-RLP   | Cbp | Cbp28518     | 85.939 | 1081 | 1   | 1077 | 0         | LRR-RLP   | same      |
| At_RPS2        | NL        | Cbp | Cbp37986     | 85.919 | 909  | 1   | 909  | 0         | NL        | same      |
| At_RPS2        | NL        | Cbp | Cbp5868      | 85.699 | 909  | 1   | 909  | 0         | NL        | same      |
| At_RLP32       | LRR-RLP   | Cbp | Cbp9533      | 84.517 | 859  | 1   | 852  | 0         | LRR-RLP   | same      |
| At_RLP32       | LRR-RLP   | Cbp | Cbp7339      | 84.517 | 859  | 1   | 852  | 0         | LRR-RLP   | same      |
| At_RPM1        | NL        | Cbp | Cbp31703     | 84.499 | 929  | 1   | 926  | 0         | NL        | same      |
| At_RLP32       | LRR-RLP   | Cbp | Cbp5035      | 84.465 | 869  | 1   | 867  | 0         | LRR-RLP   | same      |
| At_RLP30       | LRR-RLP   | Cbp | Cbp9505      | 84.037 | 758  | 30  | 786  | 0         | LRR-RLP   | same      |
| At_ADR1        | NL        | Cbp | Cbp47963     | 83.312 | 791  | 1   | 787  | 0         | NL        | same      |
| At_ADR1        | NL        | Cbp | Cbp14253     | 83.312 | 791  | 1   | 787  | 0         | NL        | same      |
| At_ADR1        | NL        | Cbp | Cbp47529     | 83.059 | 791  | 1   | 787  | 0         | NL        | same      |
| At_NGR1a       | RNL       | Cbp | Cbp28795     | 82.432 | 814  | 1   | 809  | 0         | CNL       | different |
| At_NGR1a       | RNL       | Cbp | Cbp33511     | 81.818 | 814  | 1   | 809  | 0         | CNL       | different |
| At_BAK1        | LRR-RLK   | Cbp | Cbp20587     | 81.489 | 470  | 146 | 615  | 0         | LRR-RLK   | same      |
| At_BAK1        | LRR-RLK   | Cbp | Cbp116       | 81.489 | 470  | 146 | 615  | 0         | LRR-RLK   | same      |
| Bna_MPK9       | Other-RLK | Cbp | Cbp28457     | 80.723 | 332  | 73  | 402  | 0         | Other-RLK | same      |
| At_BAK1        | LRR-RLK   | Cbp | Cbp40474     | 80.693 | 606  | 13  | 615  | 0         | LRR-RLK   | same      |
| At_RPP8        | CNL       | Cbp | Cbp8106      | 80.176 | 908  | 1   | 907  | 0         | CNL       | same      |
| At_BAK1        | LRR-RLK   | Cbp | Cbp14007     | 79.865 | 591  | 30  | 607  | 0         | LRR-RLK   | same      |
| At_BAK1        | LRR-RLK   | Cbp | Cbp14006     | 79.865 | 591  | 30  | 607  | 0         | LRR-RLK   | same      |
| At_BAK1        | LRR-RLK   | Cbp | Cbp47224     | 79.504 | 605  | 24  | 615  | 0         | LRR-RLK   | same      |
| At_RLP42       | LRR-RLP   | Cbp | Cbp45770     | 79.064 | 855  | 24  | 877  | 0         | LRR-RLP   | same      |
| At_RFO3        | Other-RLK | Cbp | Cbp19547     | 78.356 | 864  | 1   | 850  | 0         | Other-RLK | same      |
| At_RLP42       | LRR-RLP   | Cbp | Cbp36944     | 78.207 | 881  | 1   | 880  | 0         | LRR-RLP   | same      |
| At_RLP42       | LRR-RLP   | Cbp | Cbp36941     | 78.19  | 862  | 17  | 877  | 0         | LRR-RLP   | same      |
| At_RLP42       | LRR-RLP   | Cbp | Cbp36938     | 77.929 | 879  | 1   | 877  | 0         | LRR-RLP   | same      |
| At_RLP42       | LRR-RLP   | Cbp | Cbp45769     | 77.929 | 879  | 1   | 877  | 0         | LRR-RLP   | same      |
| At_RLP42       | LRR-RLP   | Cbp | Cbp36940     | 77.378 | 862  | 17  | 877  | 0         | LRR-RLP   | same      |
| At_WRR4b       | TNL       | Cbp | Cbp19202     | 76.562 | 1088 | 11  | 1091 | 0         | TNL       | same      |
| At_RLP23       | LRR-RLP   | Cbp | Cbp1801      | 75.754 | 796  | 95  | 890  | 0         | LRR-RLP   | same      |

|                |           |     |          |        |      |     |      |   |           |           |
|----------------|-----------|-----|----------|--------|------|-----|------|---|-----------|-----------|
| At_WRR4b       | TNL       | Cbp | Cbp13410 | 75.678 | 1069 | 11  | 1072 | 0 | TNL       | same      |
| At_RFO1        | Other-RLK | Cbp | Cbp41731 | 73.913 | 345  | 364 | 707  | 0 | Other-RLK | same      |
| At_WRR9        | NL        | Cbp | Cbp14210 | 73.433 | 1005 | 4   | 1002 | 0 | TNL       | different |
| At_RFO1        | Other-RLK | Cbp | Cbp23249 | 73.333 | 345  | 364 | 707  | 0 | Other-RLK | same      |
| At_RPP39       | CNL       | Cbp | Cbp33720 | 72.547 | 856  | 22  | 870  | 0 | CNL       | same      |
| At_RPP39       | CNL       | Cbp | Cbp16103 | 71.971 | 842  | 42  | 870  | 0 | CNL       | same      |
| At_RLM1a       | TNL       | Cbp | Cbp9286  | 71.945 | 1023 | 4   | 997  | 0 | TNL       | same      |
| At_RPP39       | CNL       | Cbp | Cbp33711 | 71.833 | 884  | 1   | 870  | 0 | CNL       | same      |
| At_RPP39       | CNL       | Cbp | Cbp46917 | 71.38  | 884  | 1   | 870  | 0 | CNL       | same      |
| At_RPP7        | NL        | Cbp | Cbp19065 | 71.038 | 877  | 1   | 866  | 0 | NL        | same      |
| At_RPP13       | CNL       | Cbp | Cbp39590 | 70.839 | 799  | 40  | 826  | 0 | NL        | different |
| At_RFO2        | LRR-RLP   | Cbp | Cbp50262 | 70.596 | 721  | 19  | 737  | 0 | LRR-RLK   | different |
| Bna_Rlm9/4/7   | Other-RLK | Cbp | Cbp19342 | 70.565 | 744  | 24  | 756  | 0 | Other-RLK | same      |
| At_RPP8        | CNL       | Cbp | Cbp51186 | 70.556 | 917  | 1   | 907  | 0 | CNL       | same      |
| At_RPP8        | CNL       | Cbp | Cbp51187 | 70.556 | 917  | 1   | 907  | 0 | CNL       | same      |
| At_RLP23       | LRR-RLP   | Cbp | Cbp6654  | 70.514 | 875  | 17  | 890  | 0 | LRR-RLP   | same      |
| At_RFO2        | LRR-RLP   | Cbp | Cbp47177 | 70.411 | 730  | 13  | 737  | 0 | LRR-RLK   | different |
| At_RLM1b       | TNL       | Cbp | Cbp42255 | 70.397 | 831  | 1   | 827  | 0 | TNL       | same      |
| At_WRR4b       | TNL       | Cbp | Cbp13417 | 70.388 | 412  | 13  | 424  | 0 | Other-NLR | different |
| At_RPP13       | CNL       | Cbp | Cbp39607 | 70.035 | 861  | 1   | 830  | 0 | NL        | different |
| At_RPP39       | CNL       | Cbp | Cbp33710 | 69.839 | 746  | 146 | 877  | 0 | NL        | different |
| At_WRR9        | NL        | Cbp | Cbp9219  | 69.544 | 1008 | 4   | 1002 | 0 | TNL       | different |
| Bna_Rlm9/4/7   | Other-RLK | Cbp | Cbp3356  | 69.4   | 683  | 1   | 680  | 0 | Other-RLK | same      |
| At_NGR1b       | RNL       | Cbp | Cbp28795 | 69.315 | 818  | 5   | 812  | 0 | CNL       | different |
| At_NGR1b       | RNL       | Cbp | Cbp33511 | 68.949 | 818  | 5   | 812  | 0 | CNL       | different |
| Bna_Rlm9/4/7   | Other-RLK | Cbp | Cbp13171 | 68.455 | 783  | 24  | 794  | 0 | Other-RLK | same      |
| Bna_Rlm9/4/7   | Other-RLK | Cbp | Cbp3357  | 68.356 | 809  | 4   | 794  | 0 | Other-RLK | same      |
| At_RLM1b       | TNL       | Cbp | Cbp9286  | 68.288 | 473  | 5   | 469  | 0 | TNL       | same      |
| At_RPP8        | CNL       | Cbp | Cbp46346 | 68.271 | 914  | 1   | 908  | 0 | CNL       | same      |
| At_RPP39       | CNL       | Cbp | Cbp46906 | 68.212 | 604  | 121 | 719  | 0 | NL        | different |
| Bna_Rlm9/4/7   | Other-RLK | Cbp | Cbp25638 | 68.129 | 775  | 29  | 794  | 0 | Other-RLK | same      |
| At_RLP23       | LRR-RLP   | Cbp | Cbp45770 | 67.757 | 856  | 25  | 879  | 0 | LRR-RLP   | same      |
| At_RPP8        | CNL       | Cbp | Cbp53094 | 67.724 | 914  | 1   | 908  | 0 | CNL       | same      |
| Bol_FocBo1     | TNL       | Cbp | Cbp49279 | 67.208 | 924  | 9   | 928  | 0 | TNL       | same      |
| Bol_FocBo1     | TNL       | Cbp | Cbp45527 | 67.208 | 924  | 9   | 928  | 0 | TNL       | same      |
| At_RLP23       | LRR-RLP   | Cbp | Cbp36940 | 66.744 | 863  | 18  | 879  | 0 | LRR-RLP   | same      |
| At_RLP42       | LRR-RLP   | Cbp | Cbp6654  | 66.667 | 867  | 19  | 880  | 0 | LRR-RLP   | same      |
| Bra_Crr1a      | TNL       | Cbp | Cbp3036  | 66.667 | 522  | 68  | 585  | 0 | TN        | different |
| At_RLP23       | LRR-RLP   | Cbp | Cbp45769 | 66.514 | 872  | 18  | 887  | 0 | LRR-RLP   | same      |
| At_RLP23       | LRR-RLP   | Cbp | Cbp36944 | 66.441 | 888  | 1   | 887  | 0 | LRR-RLP   | same      |
| At_RLM1b       | TNL       | Cbp | Cbp9263  | 66.37  | 1011 | 1   | 998  | 0 | TNL       | same      |
| At_RPP1        | TNL       | Cbp | Cbp39404 | 65.97  | 1196 | 1   | 1163 | 0 | TNL       | same      |
| At_RPP39       | CNL       | Cbp | Cbp33712 | 65.863 | 539  | 359 | 870  | 0 | NL        | different |
| At_RLM1a       | TNL       | Cbp | Cbp24904 | 65.857 | 659  | 44  | 701  | 0 | TNL       | same      |
| At_RPP39       | CNL       | Cbp | Cbp46916 | 65.677 | 539  | 359 | 870  | 0 | NL        | different |
| At_RPP1        | TNL       | Cbp | Cbp39399 | 65.665 | 932  | 248 | 1170 | 0 | NL        | different |
| At_RPP8        | CNL       | Cbp | Cbp19189 | 65.646 | 914  | 1   | 908  | 0 | CNL       | same      |
| At_RLP42       | LRR-RLP   | Cbp | Cbp1801  | 65.57  | 790  | 95  | 880  | 0 | LRR-RLP   | same      |
| At_RPP7        | NL        | Cbp | Cbp19079 | 65.448 | 547  | 1   | 545  | 0 | NBS       | different |
| At_RPS4        | TNL       | Cbp | Cbp29527 | 65.381 | 1141 | 11  | 1139 | 0 | TNL       | same      |
| At_RPS4        | TNL       | Cbp | Cbp26861 | 65.381 | 1141 | 11  | 1139 | 0 | TNL       | same      |
| At_RLP23       | LRR-RLP   | Cbp | Cbp36938 | 65.354 | 889  | 1   | 887  | 0 | LRR-RLP   | same      |
| At_RPP7        | NL        | Cbp | Cbp13280 | 65.265 | 547  | 1   | 545  | 0 | NBS       | different |
| At_RFO1        | Other-RLK | Cbp | Cbp41733 | 64.993 | 737  | 1   | 718  | 0 | Other-RLK | same      |
| At_WRR12       | TNL       | Cbp | Cbp48776 | 64.819 | 992  | 1   | 989  | 0 | TNL       | same      |
| At_WRR12       | TNL       | Cbp | Cbp52775 | 64.819 | 992  | 1   | 989  | 0 | TNL       | same      |
| At_RPS4        | TNL       | Cbp | Cbp45533 | 64.778 | 1147 | 5   | 1139 | 0 | TNL       | same      |
| At_WRR12       | TNL       | Cbp | Cbp48777 | 64.563 | 1030 | 1   | 1021 | 0 | TNL       | same      |
| At_WRR12       | TNL       | Cbp | Cbp52774 | 64.563 | 1030 | 1   | 1021 | 0 | TNL       | same      |
| At_RLP23       | LRR-RLP   | Cbp | Cbp36941 | 64.524 | 871  | 18  | 887  | 0 | LRR-RLP   | same      |
| At_RPP1        | TNL       | Cbp | Cbp11528 | 64.502 | 1124 | 70  | 1163 | 0 | TNL       | same      |
| At_WRR12       | TNL       | Cbp | Cbp47916 | 64.039 | 1015 | 12  | 1021 | 0 | TNL       | same      |
| At_WRR12       | TNL       | Cbp | Cbp47917 | 64.016 | 1031 | 1   | 1021 | 0 | TNL       | same      |
| At_RPS5        | TNL       | Cbp | Cbp51318 | 63.995 | 886  | 1   | 884  | 0 | CNL       | different |
| At_RPP1        | TNL       | Cbp | Cbp39406 | 63.949 | 1104 | 125 | 1163 | 0 | TNL       | same      |
| At_RFO1        | Other-RLK | Cbp | Cbp23247 | 63.946 | 735  | 1   | 718  | 0 | Other-RLK | same      |
| At_RLP23       | LRR-RLP   | Cbp | Cbp1830  | 63.75  | 720  | 175 | 889  | 0 | LRR-RLP   | same      |
| At_RPP1        | TNL       | Cbp | Cbp11527 | 63.71  | 992  | 94  | 1033 | 0 | TNL       | same      |
| Bna_LepR3/Rlm2 | LRR-RLP   | Cbp | Cbp5035  | 63.709 | 755  | 204 | 949  | 0 | LRR-RLP   | same      |
| At_RLM1b       | TNL       | Cbp | Cbp24904 | 63.554 | 664  | 44  | 706  | 0 | TNL       | same      |
| At_RPS5        | TNL       | Cbp | Cbp47695 | 63.431 | 886  | 1   | 884  | 0 | CNL       | different |
| Bna_LepR3/Rlm2 | LRR-RLP   | Cbp | Cbp40390 | 63.283 | 926  | 27  | 948  | 0 | LRR-RLP   | same      |
| At_WRR4b       | TNL       | Cbp | Cbp9286  | 63.265 | 490  | 5   | 484  | 0 | TNL       | same      |
| At_RLP23       | LRR-RLP   | Cbp | Cbp6620  | 63.194 | 720  | 175 | 889  | 0 | LRR-RLP   | same      |
| At_ADR1        | NL        | Cbp | Cbp16664 | 63.054 | 812  | 6   | 787  | 0 | NL        | same      |
| At_RRS1        | TNL       | Cbp | Cbp45534 | 63.016 | 1333 | 8   | 1277 | 0 | NL        | different |
| At_RRS1        | TNL       | Cbp | Cbp26860 | 62.941 | 1333 | 8   | 1277 | 0 | TNL       | same      |
| At_RFO1        | Other-RLK | Cbp | Cbp23248 | 62.905 | 771  | 14  | 751  | 0 | Other-RLK | same      |
| At_WRR4b       | TNL       | Cbp | Cbp9266  | 62.709 | 1019 | 1   | 1004 | 0 | Other-NLR | different |
| At_WRR9        | NL        | Cbp | Cbp42255 | 62.696 | 831  | 4   | 832  | 0 | TNL       | different |
| At_ADR1        | NL        | Cbp | Cbp17170 | 62.685 | 812  | 6   | 787  | 0 | NL        | same      |
| At_RPP1        | TNL       | Cbp | Cbp11526 | 62.585 | 1176 | 24  | 1163 | 0 | Other-NLR | different |
| At_RLM1a       | TNL       | Cbp | Cbp25968 | 62.574 | 847  | 164 | 997  | 0 | NL        | different |
| At_RLP32       | LRR-RLP   | Cbp | Cbp20439 | 62.225 | 908  | 1   | 850  | 0 | LRR-RLP   | same      |
| At_RFO1        | Other-RLK | Cbp | Cbp41732 | 62.194 | 775  | 10  | 751  | 0 | Other-RLK | same      |
| At_RLP32       | LRR-RLP   | Cbp | Cbp20445 | 62.115 | 908  | 1   | 853  | 0 | LRR-RLP   | same      |

|                |           |     |                 |        |      |     |      |           |           |           |
|----------------|-----------|-----|-----------------|--------|------|-----|------|-----------|-----------|-----------|
| At_WRR4a       | TNL       | Cbp | Cbp19202        | 62.076 | 1002 | 9   | 1004 | 0         | TNL       | same      |
| At_WRR4b       | TNL       | Cbp | Cbp13411        | 62.075 | 1060 | 3   | 1058 | 0         | TNL       | same      |
| Bna_LepR3/Rlm2 | LRR-RLP   | Cbp | Cbp9533         | 62.037 | 756  | 204 | 943  | 0         | LRR-RLP   | same      |
| Bna_LepR3/Rlm2 | LRR-RLP   | Cbp | Cbp7339         | 62.037 | 756  | 204 | 943  | 0         | LRR-RLP   | same      |
| At_RLP32       | LRR-RLP   | Cbp | Cbp15925        | 61.894 | 908  | 1   | 850  | 0         | LRR-RLP   | same      |
| Bju_WRR1       | CNL       | Cbp | Cbp8106         | 61.623 | 912  | 1   | 900  | 0         | CNL       | same      |
| At_RLP42       | LRR-RLP   | Cbp | Cbp1830         | 61.581 | 721  | 182 | 889  | 0         | LRR-RLP   | same      |
| At_RLP42       | LRR-RLP   | Cbp | Cbp6620         | 61.581 | 721  | 182 | 889  | 0         | LRR-RLP   | same      |
| At_WRR4b       | TNL       | Cbp | Cbp24904        | 61.573 | 661  | 45  | 703  | 0         | TNL       | same      |
| At_WRR4a       | TNL       | Cbp | Cbp19203        | 61.531 | 993  | 9   | 1000 | 0         | TNL       | same      |
| At_WRR4b       | TNL       | Cbp | Cbp19203        | 61.438 | 1071 | 11  | 1058 | 0         | TNL       | same      |
| At_RLP42       | LRR-RLP   | Cbp | Cbp36942        | 61.31  | 641  | 60  | 644  | 0         | LRR-RLP   | same      |
| At_RLM1b       | TNL       | Cbp | Cbp14210        | 61.22  | 1016 | 1   | 997  | 0         | TNL       | same      |
| At_RPP7        | NL        | Cbp | Cbp52173        | 61.151 | 556  | 1   | 554  | 0         | CN        | different |
| At_RLM1a       | TNL       | Cbp | Cbp9251         | 61.072 | 858  | 44  | 896  | 0         | TNL       | same      |
| At_WRR4a       | TNL       | Cbp | Cbp13411        | 61.022 | 998  | 2   | 998  | 0         | TNL       | same      |
| At_RLM1a       | TNL       | Cbp | Cbp51486        | 60.99  | 1010 | 1   | 996  | 0         | TNL       | same      |
| At_WRR9        | NL        | Cbp | Cbp24904        | 60.968 | 661  | 48  | 707  | 0         | TNL       | different |
| At_RAC1        | TNL       | Cbp | Cbp26994        | 60.953 | 1196 | 8   | 1128 | 0         | TNL       | same      |
| At_RPP8        | CNL       | Cbp | Cbp45210        | 60.914 | 875  | 1   | 867  | 0         | NL        | different |
| At_WRR4a       | TNL       | Cbp | Cbp19206        | 60.863 | 626  | 9   | 631  | 0         | TNL       | same      |
| At_RLP30       | LRR-RLP   | Cbp | Cbp10100        | 60.708 | 537  | 255 | 786  | 0         | LRR-RLP   | same      |
| Bju_WRR1       | CNL       | Cbp | Cbp46346        | 60.706 | 906  | 1   | 900  | 0         | CNL       | same      |
| At_WRR4b       | TNL       | Cbp | Cbp19206        | 60.685 | 613  | 11  | 621  | 0         | TNL       | same      |
| At_RLM1a       | TNL       | Cbp | Cbp42255        | 60.621 | 838  | 1   | 837  | 0         | TNL       | same      |
| Bju_WRR1       | CNL       | Cbp | Cbp53094        | 60.486 | 906  | 1   | 900  | 0         | CNL       | same      |
| At_WRR4a       | TNL       | Cbp | Cbp13410        | 60.379 | 1002 | 9   | 1004 | 0         | TNL       | same      |
| At_WRR8        | TNL       | Cbp | Cbp34462        | 60.361 | 1163 | 15  | 1135 | 0         | TNL       | same      |
| At_WRR4b       | TNL       | Cbp | Cbp13253        | 60.227 | 968  | 1   | 956  | 0         | TNL       | same      |
| At_RLM1a       | TNL       | Cbp | Cbp9263         | 60.199 | 1005 | 1   | 995  | 0         | TNL       | same      |
| At_RPP8        | CNL       | Cbp | Cbp520          | 60.137 | 873  | 1   | 867  | 0         | NL        | different |
| At_RPP8        | CNL       | Cbp | Cbp6345         | 60.137 | 873  | 1   | 867  | 0         | NL        | different |
| At_RPP8        | CNL       | Cbp | Cbp519          | 60.137 | 873  | 1   | 867  | 0         | NL        | different |
| At_WRR9        | NL        | Cbp | Cbp9263         | 60.039 | 1021 | 4   | 1010 | 0         | TNL       | different |
| Bol_FocBo1     | TNL       | Cru | Carubv10028353m | 60.135 | 148  | 7   | 154  | 1.24E-50  | TX        | different |
| At_RLM1b       | TNL       | Cru | Carubv10006532m | 60.759 | 158  | 1   | 157  | 6.84E-55  | TX        | different |
| At_RPP1        | TNL       | Cru | Carubv10025905m | 63.226 | 155  | 275 | 429  | 6.44E-58  | NL        | different |
| At_RLM1a       | TNL       | Cru | Carubv10006532m | 63.291 | 158  | 1   | 157  | 4.89E-58  | TX        | different |
| Bra_Crr1a      | TNL       | Cru | Carubv10019460m | 64     | 150  | 65  | 214  | 3.91E-58  | Other-NLR | different |
| Bra_Crr1a      | TNL       | Cru | Carubv10025905m | 67.097 | 155  | 247 | 401  | 7.86E-62  | NL        | different |
| At_RPP1        | TNL       | Cru | Carubv10005833m | 61.272 | 173  | 97  | 269  | 3.72E-68  | TX        | different |
| At_WRR9        | NL        | Cru | Carubv10005833m | 62.791 | 172  | 17  | 188  | 4.53E-69  | TX        | different |
| At_RLM1b       | TNL       | Cru | Carubv10021492m | 65.823 | 158  | 1   | 158  | 2.67E-69  | TX        | different |
| At_RLM1b       | TNL       | Cru | Carubv10005833m | 66.279 | 172  | 13  | 184  | 3.29E-73  | TX        | different |
| At_RLM1a       | TNL       | Cru | Carubv10021492m | 68.354 | 158  | 1   | 158  | 2.81E-73  | TX        | different |
| At_WRR4a       | TNL       | Cru | Carubv10005833m | 63.934 | 183  | 1   | 183  | 2.09E-73  | TX        | different |
| At_WRR4a       | TNL       | Cru | Carubv10021492m | 73.418 | 158  | 1   | 157  | 1.37E-76  | TX        | different |
| At_RPP1        | TNL       | Cru | Carubv10019460m | 80.795 | 151  | 92  | 242  | 2.81E-77  | Other-NLR | different |
| At_WRR4b       | TNL       | Cru | Carubv10005833m | 66.286 | 175  | 11  | 185  | 1.58E-77  | TX        | different |
| At_RLM1a       | TNL       | Cru | Carubv10005833m | 65.714 | 175  | 10  | 184  | 1.35E-77  | TX        | different |
| At_WRR4b       | TNL       | Cru | Carubv10021492m | 75.159 | 157  | 3   | 159  | 9.92E-82  | TX        | different |
| At_NGR1b       | RNL       | Cru | Carubv10028036m | 66.426 | 277  | 539 | 815  | 8.09E-119 | NL        | different |
| At_NGR1a       | RNL       | Cru | Carubv10028036m | 67.509 | 277  | 533 | 809  | 5.53E-120 | NL        | different |
| At_RPP39       | CNL       | Cru | Carubv10021673m | 67.268 | 388  | 323 | 705  | 1.92E-153 | NL        | different |
| At_RLM3        | TN        | Cru | Carubv10025753m | 60.448 | 402  | 58  | 450  | 3.24E-155 | TNL       | different |
| At_RPP2a       | TNL       | Cru | Carubv10025432m | 63.325 | 409  | 7   | 414  | 3.63E-156 | TNL       | same      |
| At_RPP2a       | TNL       | Cru | Carubv10025753m | 68.245 | 359  | 56  | 414  | 2.92E-159 | TNL       | same      |
| At_RPP2a       | TNL       | Cru | Carubv10004008m | 63.659 | 410  | 7   | 414  | 8.32E-165 | TNL       | same      |
| Bna_Rlm9/4/7   | Other-RLK | Cru | Carubv10009505m | 69.591 | 342  | 395 | 735  | 3.63E-165 | Other-RLK | same      |
| At_RPP4        | TNL       | Cru | Carubv10004008m | 64.352 | 432  | 676 | 1105 | 3.94E-169 | TNL       | same      |
| At_BAK1        | LRR-RLK   | Cru | Carubv10006936m | 98.537 | 615  | 1   | 615  | 0         | LRR-RLK   | same      |
| At_PBS1        | Other-RLK | Cru | Carubv10000618m | 98.026 | 456  | 1   | 456  | 0         | Other-RLK | same      |
| At_FLS2        | LRR-RLK   | Cru | Carubv10025764m | 90.235 | 1147 | 23  | 1167 | 0         | LRR-RLK   | same      |
| At_SOBI1       | LRR-RLK   | Cru | Carubv10025406m | 88.043 | 644  | 1   | 641  | 0         | LRR-RLK   | same      |
| At_RPS4        | TNL       | Cru | Carubv10025757m | 85.115 | 1216 | 1   | 1199 | 0         | TNL       | same      |
| At_ADR1        | NL        | Cru | Carubv10008348m | 83.439 | 791  | 1   | 787  | 0         | NL        | same      |
| At_NGR1a       | RNL       | Cru | Carubv10027991m | 82.432 | 814  | 1   | 809  | 0         | CNL       | different |
| At_BAK1        | LRR-RLK   | Cru | Carubv10013676m | 81.798 | 456  | 160 | 615  | 0         | LRR-RLK   | same      |
| At_RRS1        | TNL       | Cru | Carubv10025742m | 81.081 | 1295 | 1   | 1277 | 0         | TNL       | same      |
| At_BAK1        | LRR-RLK   | Cru | Carubv10013244m | 79.935 | 618  | 1   | 615  | 0         | LRR-RLK   | same      |
| At_RPP8        | CNL       | Cru | Carubv10025854m | 79.736 | 908  | 1   | 907  | 0         | CNL       | same      |
| At_BAK1        | LRR-RLK   | Cru | Carubv10019969m | 79.504 | 605  | 24  | 615  | 0         | LRR-RLK   | same      |
| At_RFO3        | Other-RLK | Cru | Carubv10015398m | 76.539 | 861  | 1   | 850  | 0         | Other-RLK | same      |
| At_BAK1        | LRR-RLK   | Cru | Carubv10011846m | 76.214 | 618  | 10  | 615  | 0         | LRR-RLK   | same      |
| At_RPP2b       | TNL       | Cru | Carubv10006430m | 76.155 | 1212 | 1   | 1207 | 0         | TNL       | same      |
| At_RPP2a       | TNL       | Cru | Carubv10007493m | 74.466 | 889  | 409 | 1275 | 0         | TNL       | same      |
| At_RPP39       | CNL       | Cru | Carubv10020008m | 74.322 | 479  | 146 | 624  | 0         | NL        | different |
| At_RFO1        | Other-RLK | Cru | Carubv10009505m | 73.333 | 345  | 364 | 707  | 0         | Other-RLK | same      |
| At_RPP8        | CNL       | Cru | Carubv10027796m | 72.827 | 909  | 1   | 907  | 0         | CNL       | same      |
| At_RPP8        | CNL       | Cru | Carubv10004109m | 72.527 | 910  | 1   | 907  | 0         | CNL       | same      |
| At_RPP7        | NL        | Cru | Carubv10019742m | 72.299 | 870  | 1   | 866  | 0         | NL        | same      |
| At_RPP7        | NL        | Cru | Carubv10019741m | 72.299 | 870  | 1   | 866  | 0         | NL        | same      |
| At_RPP39       | CNL       | Cru | Carubv10019775m | 72.241 | 879  | 1   | 870  | 0         | CNL       | same      |
| At_WRR8        | TNL       | Cru | Carubv10027634m | 71.959 | 1159 | 20  | 1139 | 0         | TNL       | same      |
| At_RPP39       | CNL       | Cru | Carubv10019842m | 71.68  | 738  | 146 | 870  | 0         | NL        | different |
| At_RPP39       | CNL       | Cru | Carubv10019789m | 71.395 | 846  | 42  | 874  | 0         | CNL       | same      |

|              |           |     |                 |        |      |     |      |          |           |           |
|--------------|-----------|-----|-----------------|--------|------|-----|------|----------|-----------|-----------|
| Bna_Rlm9/4/7 | Other-RLK | Cru | Carubv10013039m | 71.35  | 726  | 22  | 737  | 0        | Other-RLK | same      |
| At_RFO1      | Other-RLK | Cru | Carubv10008263m | 71.076 | 446  | 308 | 751  | 0        | Other-RLK | same      |
| At_RPP8      | CNL       | Cru | Carubv10028494m | 70.82  | 915  | 1   | 908  | 0        | CNL       | same      |
| At_RPP39     | CNL       | Cru | Carubv10019851m | 70.777 | 746  | 146 | 877  | 0        | NL        | different |
| At_RPP39     | CNL       | Cru | Carubv10019773m | 70.535 | 879  | 1   | 870  | 0        | CNL       | same      |
| At_RPP13     | CNL       | Cru | Carubv10018962m | 70.525 | 838  | 1   | 826  | 0        | NL        | different |
| At_RPP8      | CNL       | Cru | Carubv10008215m | 70.229 | 917  | 1   | 907  | 0        | CNL       | same      |
| At_RAC1      | TNL       | Cru | Carubv10027634m | 69.509 | 1161 | 9   | 1156 | 0        | TNL       | same      |
| At_RFO2      | LRR-RLP   | Cru | Carubv10022303m | 69.501 | 741  | 13  | 748  | 0        | LRR-RLK   | different |
| At_NGR1b     | RNL       | Cru | Carubv10027991m | 69.315 | 818  | 5   | 812  | 0        | CNL       | different |
| Bna_Rlm9/4/7 | Other-RLK | Cru | Carubv10021418m | 68.992 | 645  | 29  | 669  | 0        | Other-RLK | same      |
| At_RPP8      | CNL       | Cru | Carubv10008267m | 68.531 | 912  | 1   | 906  | 0        | CNL       | same      |
| At_RPP39     | CNL       | Cru | Carubv10019908m | 68.175 | 707  | 176 | 874  | 0        | NL        | different |
| Bna_Rlm9/4/7 | Other-RLK | Cru | Carubv10019823m | 67.98  | 812  | 1   | 794  | 0        | Other-RLK | same      |
| Bol_FocBo1   | TNL       | Cru | Carubv10025753m | 67.208 | 924  | 9   | 928  | 0        | TNL       | same      |
| At_RPP7      | NL        | Cru | Carubv10022028m | 66.858 | 872  | 1   | 866  | 0        | NL        | same      |
| At_RPP8      | CNL       | Cru | Carubv10019753m | 65.864 | 914  | 1   | 908  | 0        | CNL       | same      |
| At_WRR12     | TNL       | Cru | Carubv10004054m | 64.819 | 992  | 1   | 989  | 0        | TNL       | same      |
| At_RPS4      | TNL       | Cru | Carubv10025767m | 64.778 | 1147 | 5   | 1139 | 0        | TNL       | same      |
| At_RPS4      | TNL       | Cru | Carubv10025765m | 64.778 | 1147 | 5   | 1139 | 0        | TNL       | same      |
| At_RPS4      | TNL       | Cru | Carubv10025766m | 64.778 | 1147 | 5   | 1139 | 0        | TNL       | same      |
| At_WRR12     | TNL       | Cru | Carubv10004053m | 64.563 | 1030 | 1   | 1021 | 0        | TNL       | same      |
| At_RPS4      | TNL       | Cru | Carubv10025769m | 64.516 | 1147 | 5   | 1139 | 0        | TNL       | same      |
| Bna_Rlm9/4/7 | Other-RLK | Cru | Carubv10008562m | 64.172 | 441  | 359 | 793  | 0        | Other-RLK | same      |
| At_RPS5      | TNL       | Cru | Carubv10012293m | 63.995 | 886  | 1   | 884  | 0        | CNL       | different |
| At_RFO1      | Other-RLK | Cru | Carubv10008430m | 63.946 | 735  | 1   | 718  | 0        | Other-RLK | same      |
| At_RPP5      | TNL       | Cru | Carubv10004008m | 63.844 | 874  | 6   | 847  | 0        | TNL       | same      |
| At_RPP7      | NL        | Cru | Carubv10021896m | 63.543 | 875  | 1   | 869  | 0        | NL        | same      |
| At_RRS1      | TNL       | Cru | Carubv10025744m | 63.213 | 1332 | 8   | 1277 | 0        | TNL       | same      |
| At_ADR1      | NL        | Cru | Carubv10000246m | 62.685 | 812  | 6   | 787  | 0        | NL        | same      |
| At_RPS5      | TNL       | Cru | Carubv10008409m | 61.757 | 740  | 149 | 883  | 0        | NL        | different |
| Bna_Rlm9/4/7 | Other-RLK | Cru | Carubv10008263m | 61.674 | 454  | 344 | 793  | 0        | Other-RLK | same      |
| At_RPP8      | CNL       | Cru | Carubv10022213m | 61.588 | 781  | 1   | 774  | 0        | CNL       | same      |
| Bju_WRR1     | CNL       | Cru | Carubv10025854m | 61.294 | 912  | 1   | 900  | 0        | CNL       | same      |
| At_RPS5      | TNL       | Cru | Carubv10008383m | 61.227 | 766  | 123 | 883  | 0        | NL        | different |
| Bju_WRR1     | CNL       | Cru | Carubv10008267m | 61.038 | 906  | 1   | 900  | 0        | CNL       | same      |
| At_RPP7      | NL        | Cru | Carubv10019978m | 60.548 | 621  | 1   | 615  | 0        | CNL       | different |
| At_RPP7      | NL        | Cru | Carubv10021618m | 60.426 | 892  | 4   | 866  | 0        | CNL       | different |
| At_RPP8      | CNL       | Cru | Carubv10007066m | 60.367 | 873  | 1   | 867  | 0        | NL        | different |
| At_RPP1      | TNL       | Cru | Carubv10007991m | 60.248 | 888  | 363 | 1163 | 0        | NL        | different |
| Bol_FocBo1   | TNL       | Cru | Carubv10004008m | 60.177 | 904  | 7   | 902  | 0        | TNL       | same      |
| At_RPS5      | TNL       | Cru | Carubv10020008m | 60.166 | 482  | 148 | 629  | 0        | NL        | different |
| At_RLM1b     | TNL       | Esa | Thhalv10027706m | 61.486 | 148  | 532 | 679  | 3.84E-51 | TNL       | same      |
| At_WRR9      | NL        | Esa | Thhalv10027706m | 62.838 | 148  | 533 | 680  | 8.76E-52 | TNL       | different |
| At_RLM1b     | TNL       | Esa | Thhalv10028273m | 60.135 | 148  | 1   | 148  | 4.73E-54 | TX        | different |
| At_RPP5      | TNL       | Esa | Thhalv10027748m | 61.818 | 165  | 14  | 178  | 3.75E-57 | Other-NLR | different |
| At_RPP5      | TNL       | Esa | Thhalv10027751m | 61.818 | 165  | 14  | 178  | 3.66E-57 | TX        | different |
| At_RPP5      | TNL       | Esa | Thhalv10027752m | 62.424 | 165  | 14  | 178  | 1.61E-57 | TX        | different |
| At_RPP5      | TNL       | Esa | Thhalv10027754m | 62.424 | 165  | 14  | 178  | 1.57E-57 | TX        | different |
| At_RPP5      | TNL       | Esa | Thhalv10027802m | 61.818 | 165  | 14  | 178  | 1.41E-58 | TX        | different |
| At_RPP4      | TNL       | Esa | Thhalv10026484m | 60.927 | 151  | 93  | 243  | 6.36E-59 | TN        | different |
| At_RPP2a     | TNL       | Esa | Thhalv10026484m | 60.667 | 150  | 91  | 240  | 1.01E-59 | TN        | different |
| At_RLM1b     | TNL       | Esa | Thhalv10027748m | 61.35  | 163  | 14  | 176  | 7.44E-60 | Other-NLR | different |
| At_RLM1b     | TNL       | Esa | Thhalv10027751m | 61.35  | 163  | 14  | 176  | 6.41E-60 | TX        | different |
| Bol_FocBo1   | TNL       | Esa | Thhalv10027748m | 60.87  | 161  | 12  | 172  | 4.13E-60 | Other-NLR | different |
| Bol_FocBo1   | TNL       | Esa | Thhalv10027751m | 60.87  | 161  | 12  | 172  | 3.73E-60 | TX        | different |
| At_RLM1b     | TNL       | Esa | Thhalv10027802m | 61.35  | 163  | 14  | 176  | 1.30E-60 | TX        | different |
| At_WRR4a     | TNL       | Esa | Thhalv10027748m | 60.119 | 168  | 14  | 181  | 9.04E-61 | Other-NLR | different |
| At_WRR4a     | TNL       | Esa | Thhalv10027751m | 60.119 | 168  | 14  | 181  | 9.00E-61 | TX        | different |
| Bol_FocBo1   | TNL       | Esa | Thhalv10027802m | 60.87  | 161  | 12  | 172  | 7.66E-61 | TX        | different |
| At_RPP1      | TNL       | Esa | Thhalv10027752m | 60.87  | 161  | 100 | 260  | 6.69E-61 | TX        | different |
| At_RPP1      | TNL       | Esa | Thhalv10027748m | 61.491 | 161  | 100 | 260  | 6.51E-61 | Other-NLR | different |
| At_RPP1      | TNL       | Esa | Thhalv10027751m | 61.491 | 161  | 100 | 260  | 6.29E-61 | TX        | different |
| At_RPP1      | TNL       | Esa | Thhalv10027754m | 60.87  | 161  | 100 | 260  | 5.83E-61 | TX        | different |
| Bra_Crr1a    | TNL       | Esa | Thhalv10027748m | 61.491 | 161  | 72  | 232  | 3.77E-61 | Other-NLR | different |
| Bra_Crr1a    | TNL       | Esa | Thhalv10027751m | 61.491 | 161  | 72  | 232  | 3.44E-61 | TX        | different |
| At_RPP5      | TNL       | Esa | Thhalv10026484m | 63.636 | 154  | 92  | 245  | 1.98E-61 | TN        | different |
| At_WRR4a     | TNL       | Esa | Thhalv10027802m | 60.119 | 168  | 14  | 181  | 1.80E-61 | TX        | different |
| At_RPP1      | TNL       | Esa | Thhalv10027802m | 61.491 | 161  | 100 | 260  | 1.65E-61 | TX        | different |
| Bra_Crr1a    | TNL       | Esa | Thhalv10027802m | 61.491 | 161  | 72  | 232  | 1.04E-61 | TX        | different |
| At_RLM1a     | TNL       | Esa | Thhalv10027748m | 60.479 | 167  | 16  | 182  | 2.93E-62 | Other-NLR | different |
| At_RLM1a     | TNL       | Esa | Thhalv10027751m | 60.479 | 167  | 16  | 182  | 2.89E-62 | TX        | different |
| Bra_Crr1a    | TNL       | Esa | Thhalv10027752m | 62.112 | 161  | 72  | 232  | 8.19E-63 | TX        | different |
| Bra_Crr1a    | TNL       | Esa | Thhalv10027754m | 62.112 | 161  | 72  | 232  | 8.06E-63 | TX        | different |
| At_RLM1a     | TNL       | Esa | Thhalv10027752m | 60.355 | 169  | 16  | 184  | 6.69E-63 | TX        | different |
| At_RLM3      | TN        | Esa | Thhalv10026484m | 62.667 | 150  | 89  | 238  | 6.34E-63 | TN        | same      |
| At_RLM1a     | TNL       | Esa | Thhalv10027754m | 60.355 | 169  | 16  | 184  | 6.09E-63 | TX        | different |
| At_RLM1a     | TNL       | Esa | Thhalv10027802m | 60.479 | 167  | 16  | 182  | 4.85E-63 | TX        | different |
| At_WRR4a     | TNL       | Esa | Thhalv10027752m | 61.176 | 170  | 14  | 183  | 1.97E-63 | TX        | different |
| At_WRR4a     | TNL       | Esa | Thhalv10027754m | 61.176 | 170  | 14  | 183  | 1.92E-63 | TX        | different |
| At_WRR4b     | TNL       | Esa | Thhalv10027748m | 63.58  | 162  | 16  | 177  | 4.91E-65 | Other-NLR | different |
| At_WRR4b     | TNL       | Esa | Thhalv10027751m | 63.58  | 162  | 16  | 177  | 4.74E-65 | TX        | different |
| At_RPP2a     | TNL       | Esa | Thhalv10024445m | 69.091 | 165  | 250 | 414  | 1.77E-65 | NL        | different |
| At_RLM3      | TN        | Esa | Thhalv10024445m | 60.106 | 188  | 248 | 427  | 1.34E-65 | NL        | different |
| At_WRR4b     | TNL       | Esa | Thhalv10027802m | 63.58  | 162  | 16  | 177  | 1.29E-65 | TX        | different |
| At_WRR4b     | TNL       | Esa | Thhalv10027752m | 62.353 | 170  | 16  | 185  | 8.69E-66 | TX        | different |

|                |           |     |                 |        |      |     |      |           |           |           |
|----------------|-----------|-----|-----------------|--------|------|-----|------|-----------|-----------|-----------|
| At_WRR4b       | TNL       | Esa | Thhalv10027754m | 62.353 | 170  | 16  | 185  | 8.32E-66  | TX        | different |
| Bra_cRa/cRb    | TNL       | Esa | Thhalv10011769m | 61.765 | 204  | 16  | 219  | 1.01E-66  | TX        | different |
| Bol_FocBo1     | TNL       | Esa | Thhalv10026484m | 76.667 | 150  | 91  | 240  | 4.82E-76  | TN        | different |
| At_RLP32       | LRR-RLP   | Esa | Thhalv10003118m | 60.417 | 240  | 614 | 853  | 3.08E-77  | LRR-RLP   | same      |
| At_RAC1        | TNL       | Esa | Thhalv10028756m | 62.866 | 307  | 146 | 451  | 2.96E-112 | NBS       | different |
| At_WRR8        | TNL       | Esa | Thhalv10028756m | 60.991 | 323  | 156 | 477  | 5.46E-119 | NBS       | different |
| At_RPP2a       | TNL       | Esa | Thhalv10019465m | 60.399 | 351  | 66  | 414  | 1.27E-132 | TNL       | same      |
| At_RLP32       | LRR-RLP   | Esa | Thhalv10000552m | 60.513 | 390  | 478 | 854  | 1.64E-137 | LRR-RLP   | same      |
| At_RPP39       | CNL       | Esa | Thhalv10023842m | 61.347 | 401  | 479 | 870  | 6.34E-143 | LRR-RLP   | different |
| At_RPP2a       | TNL       | Esa | Thhalv10026940m | 60.145 | 414  | 1   | 414  | 4.18E-151 | TN        | different |
| At_WRR4b       | TNL       | Esa | Thhalv10000509m | 64.467 | 394  | 11  | 402  | 1.04E-168 | TN        | different |
| At_NGR1b       | RNL       | Esa | Thhalv10005517m | 61.717 | 431  | 391 | 815  | 1.78E-170 | NL        | different |
| At_RLM1a       | TNL       | Esa | Thhalv10000509m | 64.573 | 398  | 10  | 406  | 2.30E-174 | TN        | different |
| At_WRR9        | NL        | Esa | Thhalv10000509m | 63.747 | 411  | 4   | 407  | 1.97E-174 | TN        | different |
| At_BAK1        | LRR-RLK   | Esa | Thhalv10024694m | 95.935 | 615  | 1   | 615  | 0         | LRR-RLK   | same      |
| At_RFO1        | Other-RLK | Esa | Thhalv10018175m | 87.484 | 759  | 1   | 751  | 0         | Other-RLK | same      |
| At_RPS2        | NL        | Esa | Thhalv10024353m | 86.374 | 910  | 1   | 909  | 0         | CNL       | different |
| At_RPM1        | NL        | Esa | Thhalv10020008m | 83.746 | 929  | 1   | 926  | 0         | NL        | same      |
| At_FLS2        | LRR-RLK   | Esa | Thhalv10000746m | 82.165 | 1155 | 23  | 1173 | 0         | LRR-RLK   | same      |
| At_SOBR1       | LRR-RLK   | Esa | Thhalv10016374m | 81.182 | 643  | 1   | 641  | 0         | LRR-RLK   | same      |
| At_BAK1        | LRR-RLK   | Esa | Thhalv10019435m | 79.833 | 600  | 29  | 615  | 0         | LRR-RLK   | same      |
| At_BAK1        | LRR-RLK   | Esa | Thhalv10007069m | 78.477 | 604  | 24  | 615  | 0         | LRR-RLK   | same      |
| At_NGR1a       | RNL       | Esa | Thhalv10003662m | 78.022 | 819  | 1   | 809  | 0         | CNL       | different |
| At_RLP42       | LRR-RLP   | Esa | Thhalv10010006m | 73.576 | 878  | 1   | 876  | 0         | LRR-RLP   | same      |
| At_RPP2a       | TNL       | Esa | Thhalv10027276m | 73.54  | 582  | 720 | 1299 | 0         | TNL       | same      |
| At_WRR4b       | TNL       | Esa | Thhalv10000023m | 73.084 | 1070 | 1   | 1059 | 0         | TNL       | same      |
| At_RPS4        | TNL       | Esa | Thhalv10000750m | 73.045 | 1202 | 1   | 1196 | 0         | TNL       | same      |
| At_RLM1b       | TNL       | Esa | Thhalv10000647m | 72.771 | 628  | 1   | 626  | 0         | TNL       | same      |
| At_RFO2        | LRR-RLP   | Esa | Thhalv10006928m | 72.57  | 751  | 1   | 748  | 0         | LRR-RLP   | same      |
| At_RFO2        | LRR-RLP   | Esa | Thhalv10018044m | 71.55  | 703  | 46  | 748  | 0         | LRR-RLK   | different |
| At_RLM1b       | TNL       | Esa | Thhalv10000695m | 71.383 | 622  | 7   | 626  | 0         | TNL       | same      |
| At_RLM1b       | TNL       | Esa | Thhalv10000509m | 70.968 | 403  | 6   | 407  | 0         | TN        | different |
| At_RPP8        | CNL       | Esa | Thhalv10002442m | 70.172 | 580  | 1   | 573  | 0         | NBS       | different |
| At_WRR4b       | TNL       | Esa | Thhalv10027634m | 70.131 | 914  | 5   | 916  | 0         | TNL       | same      |
| At_RPP39       | CNL       | Esa | Thhalv10023260m | 69.811 | 848  | 42  | 870  | 0         | CNL       | same      |
| At_RPP39       | CNL       | Esa | Thhalv10023248m | 69.629 | 889  | 1   | 870  | 0         | CNL       | same      |
| At_RPP39       | CNL       | Esa | Thhalv10023258m | 69.58  | 881  | 1   | 868  | 0         | CNL       | same      |
| At_RLP32       | LRR-RLP   | Esa | Thhalv10002360m | 69.347 | 659  | 197 | 854  | 0         | LRR-RLP   | same      |
| At_RPP39       | CNL       | Esa | Thhalv10023286m | 68.828 | 802  | 1   | 792  | 0         | CNL       | same      |
| At_RPP39       | CNL       | Esa | Thhalv10023257m | 68.806 | 888  | 1   | 875  | 0         | CNL       | same      |
| At_NGR1a       | RNL       | Esa | Thhalv10020099m | 68.666 | 817  | 1   | 809  | 0         | CNL       | different |
| At_NGR1b       | RNL       | Esa | Thhalv10020099m | 68.187 | 811  | 9   | 815  | 0         | CNL       | different |
| At_RPP39       | CNL       | Esa | Thhalv10023266m | 68.146 | 879  | 1   | 870  | 0         | CNL       | same      |
| At_NGR1b       | RNL       | Esa | Thhalv10003662m | 68.039 | 826  | 3   | 815  | 0         | CNL       | different |
| At_WRR4a       | TNL       | Esa | Thhalv10027634m | 67.634 | 896  | 3   | 897  | 0         | TNL       | same      |
| At_RPP2b       | TNL       | Esa | Thhalv1002441m  | 67.6   | 821  | 1   | 818  | 0         | TNL       | same      |
| At_RLP32       | LRR-RLP   | Esa | Thhalv10000034m | 67.6   | 750  | 128 | 854  | 0         | LRR-RLP   | same      |
| Bju_WRR1       | CNL       | Esa | Thhalv10002442m | 67.526 | 582  | 1   | 571  | 0         | NBS       | different |
| At_RLM1b       | TNL       | Esa | Thhalv10023230m | 67.512 | 1025 | 1   | 1013 | 0         | TNL       | same      |
| At_RLP23       | LRR-RLP   | Esa | Thhalv10010006m | 67.269 | 886  | 1   | 885  | 0         | LRR-RLP   | same      |
| At_RLM1a       | TNL       | Esa | Thhalv10000647m | 67.095 | 623  | 3   | 622  | 0         | TNL       | same      |
| At_WRR9        | NL        | Esa | Thhalv10000647m | 66.773 | 626  | 5   | 627  | 0         | TNL       | different |
| At_RLM1a       | TNL       | Esa | Thhalv10000695m | 66.504 | 615  | 10  | 621  | 0         | TNL       | same      |
| At_NGR1a       | RNL       | Esa | Thhalv10005443m | 66.299 | 816  | 1   | 806  | 0         | CNL       | different |
| At_RRS1        | TNL       | Esa | Thhalv10001165m | 66.127 | 803  | 1   | 799  | 0         | TNL       | same      |
| At_NGR1a       | RNL       | Esa | Thhalv10005517m | 66.033 | 421  | 396 | 809  | 0         | NL        | different |
| At_RLP32       | LRR-RLP   | Esa | Thhalv10000044m | 65.826 | 872  | 9   | 854  | 0         | LRR-RLP   | same      |
| At_RLP23       | LRR-RLP   | Esa | Thhalv10016266m | 65.69  | 717  | 175 | 889  | 0         | LRR-RLP   | same      |
| At_RLP42       | LRR-RLP   | Esa | Thhalv10016266m | 65.429 | 700  | 182 | 876  | 0         | LRR-RLP   | same      |
| At_WRR9        | NL        | Esa | Thhalv10000695m | 65.428 | 619  | 12  | 627  | 0         | TNL       | different |
| Bna_LepR3/Rlm2 | LRR-RLP   | Esa | Thhalv10002360m | 65.263 | 665  | 286 | 948  | 0         | LRR-RLP   | same      |
| At_RLP23       | LRR-RLP   | Esa | Thhalv10016267m | 64.903 | 718  | 175 | 889  | 0         | LRR-RLP   | same      |
| At_NGR1b       | RNL       | Esa | Thhalv10005443m | 64.233 | 808  | 11  | 813  | 0         | CNL       | different |
| At_RLP30       | LRR-RLP   | Esa | Thhalv10024467m | 64.194 | 782  | 1   | 779  | 0         | LRR-RLP   | same      |
| At_WRR4a       | TNL       | Esa | Thhalv10000023m | 63.836 | 1001 | 9   | 1002 | 0         | TNL       | same      |
| At_RLP32       | LRR-RLP   | Esa | Thhalv10000035m | 63.745 | 924  | 9   | 854  | 0         | LRR-RLP   | same      |
| Bol_FocBo1     | TNL       | Esa | Thhalv10026940m | 63.498 | 526  | 5   | 513  | 0         | TN        | different |
| At_RLP42       | LRR-RLP   | Esa | Thhalv10016267m | 63.421 | 719  | 182 | 889  | 0         | LRR-RLP   | same      |
| At_RLP30       | LRR-RLP   | Esa | Thhalv10018341m | 62.937 | 572  | 203 | 769  | 0         | LRR-RLP   | same      |
| At_RFO1        | Other-RLK | Esa | Thhalv10006943m | 62.807 | 734  | 2   | 718  | 0         | Other-RLK | same      |
| At_ADR1        | NL        | Esa | Thhalv10012720m | 62.779 | 806  | 6   | 787  | 0         | NL        | same      |
| Bol_FocBo1     | TNL       | Esa | Thhalv10024445m | 62.537 | 670  | 250 | 907  | 0         | NL        | different |
| At_RFO1        | Other-RLK | Esa | Thhalv10009310m | 62.5   | 768  | 10  | 751  | 0         | Other-RLK | same      |
| At_WRR4b       | TNL       | Esa | Thhalv10000647m | 62.179 | 624  | 4   | 624  | 0         | TNL       | same      |
| Bna_LepR3/Rlm2 | LRR-RLP   | Esa | Thhalv10000044m | 62.152 | 790  | 163 | 948  | 0         | LRR-RLP   | same      |
| At_RPS5        | TNL       | Esa | Thhalv10024140m | 61.959 | 531  | 1   | 530  | 0         | CN        | different |
| At_RLP30       | LRR-RLP   | Esa | Thhalv10024473m | 61.911 | 806  | 1   | 774  | 0         | LRR-RLP   | same      |
| At_RLP32       | LRR-RLP   | Esa | Thhalv10000632m | 61.846 | 899  | 17  | 854  | 0         | LRR-RLP   | same      |
| Bol_FocBo1     | TNL       | Esa | Thhalv10019465m | 61.528 | 720  | 65  | 778  | 0         | TNL       | same      |
| At_RLM1a       | TNL       | Esa | Thhalv10018052m | 61.393 | 1005 | 1   | 997  | 0         | TNL       | same      |
| At_RPP5        | TNL       | Esa | Thhalv10026940m | 61.308 | 535  | 3   | 518  | 0         | TN        | different |
| At_WRR4b       | TNL       | Esa | Thhalv10000695m | 61.264 | 617  | 11  | 623  | 0         | TNL       | same      |
| Bna_Rlm9/4/7   | Other-RLK | Esa | Thhalv10001848m | 60.833 | 720  | 100 | 794  | 0         | Other-RLK | same      |
| At_WRR8        | TNL       | Esa | Thhalv10003136m | 60.794 | 1158 | 12  | 1139 | 0         | TNL       | same      |
| At_RPP7        | NL        | Esa | Thhalv10023235m | 60.585 | 992  | 1   | 977  | 0         | NL        | same      |
| At_ADR1        | NL        | Esa | Thhalv10024421m | 60.488 | 820  | 3   | 787  | 0         | NL        | same      |



|                |           |     |                    |        |      |     |      |           |           |           |
|----------------|-----------|-----|--------------------|--------|------|-----|------|-----------|-----------|-----------|
| At_RLP32       | LRR-RLP   | Esa | Thhalv10002367m    | 60.211 | 950  | 9   | 854  | 0         | LRR-RLP   | same      |
| Bra_Crr1a      | TNL       | Lal | LA_scaffold1274_1  | 60.494 | 162  | 808 | 968  | 9.27E-49  | TNL       | same      |
| At_RPP4        | TNL       | Lal | LA_C64493_1        | 60.479 | 167  | 715 | 880  | 8.24E-53  | TNL       | same      |
| At_WRR4a       | TNL       | Lal | LA_scaffold3244_19 | 62.416 | 149  | 9   | 157  | 3.04E-54  | TX        | different |
| At_WRR4b       | TNL       | Lal | LA_scaffold3244_19 | 61.074 | 149  | 11  | 159  | 8.33E-56  | TX        | different |
| At_RLM1a       | TNL       | Lal | LA_scaffold3244_19 | 61.074 | 149  | 10  | 158  | 2.71E-56  | TX        | different |
| At_WRR9        | NL        | Lal | LA_scaffold345_4   | 63.087 | 149  | 13  | 161  | 8.45E-57  | TNL       | different |
| At_RPP1        | TNL       | Lal | LA_scaffold707_4   | 63.636 | 154  | 248 | 401  | 7.39E-57  | NL        | different |
| Bra_Crr1a      | TNL       | Lal | LA_scaffold3244_19 | 63.514 | 148  | 67  | 214  | 4.74E-60  | TX        | different |
| At_RPP4        | TNL       | Lal | LA_scaffold3465_1  | 64.118 | 170  | 10  | 179  | 1.08E-61  | TNL       | same      |
| Bol_FocBo1     | TNL       | Lal | LA_scaffold512_7   | 63.095 | 168  | 97  | 264  | 5.06E-62  | TNL       | same      |
| At_RPP1        | TNL       | Lal | LA_scaffold3244_19 | 64.238 | 151  | 92  | 242  | 4.16E-63  | TX        | different |
| At_RPP5        | TNL       | Lal | LA_scaffold3465_1  | 66.667 | 168  | 12  | 179  | 7.99E-64  | TNL       | same      |
| At_RLM3        | TN        | Lal | LA_scaffold3465_1  | 61.143 | 175  | 6   | 180  | 4.99E-65  | TNL       | different |
| At_WRR9        | NL        | Lal | LA_scaffold292_4   | 60.795 | 176  | 307 | 482  | 1.03E-66  | TN        | different |
| At_RLM1b       | TNL       | Lal | LA_scaffold2656_3  | 62.651 | 166  | 16  | 181  | 3.97E-67  | TX        | different |
| At_WRR4a       | TNL       | Lal | LA_scaffold2656_3  | 62.424 | 165  | 15  | 179  | 3.96E-67  | TX        | different |
| Bol_FocBo1     | TNL       | Lal | LA_scaffold3465_1  | 66.279 | 172  | 6   | 177  | 6.04E-69  | TNL       | same      |
| At_RLM1a       | TNL       | Lal | LA_scaffold2656_3  | 66.061 | 165  | 16  | 180  | 1.19E-72  | TX        | different |
| At_WRR4b       | TNL       | Lal | LA_scaffold2656_3  | 67.47  | 166  | 17  | 182  | 3.31E-75  | TX        | different |
| At_WRR4b       | TNL       | Lal | LA_scaffold345_4   | 84.076 | 157  | 1   | 157  | 6.84E-77  | TNL       | same      |
| At_RLM1b       | TNL       | Lal | LA_scaffold292_4   | 72.571 | 175  | 303 | 477  | 3.20E-81  | TN        | different |
| At_RPP2a       | TNL       | Lal | LA_scaffold512_7   | 64.557 | 237  | 178 | 414  | 4.68E-95  | TNL       | same      |
| At_RPP1        | TNL       | Lal | LA_scaffold1274_1  | 62.4   | 250  | 93  | 335  | 1.57E-96  | TNL       | same      |
| At_RPP1        | TNL       | Lal | LA_scaffold3231_2  | 66.531 | 245  | 136 | 380  | 8.46E-106 | TNL       | same      |
| At_RLP30       | LRR-RLP   | Lal | LA_scaffold1391_3  | 60.714 | 364  | 427 | 786  | 3.11E-135 | LRR-RLP   | same      |
| At_RPP1        | TNL       | Lal | LA_C59137_1        | 64.307 | 339  | 66  | 402  | 3.45E-139 | TN        | different |
| At_PBS1        | Other-RLK | Lal | LA_scaffold3521_10 | 66.447 | 304  | 61  | 364  | 1.31E-140 | Other-RLK | same      |
| At_RPP2a       | TNL       | Lal | LA_scaffold1873_18 | 61.916 | 407  | 8   | 414  | 7.39E-156 | TNL       | same      |
| At_WRR4b       | TNL       | Lal | LA_C58557_1        | 61.013 | 395  | 6   | 398  | 2.37E-160 | TN        | different |
| At_RLM1b       | TNL       | Lal | LA_C58557_1        | 60.56  | 393  | 5   | 396  | 7.93E-164 | TN        | different |
| At_PBS1        | Other-RLK | Lal | LA_scaffold729_7   | 73.09  | 301  | 65  | 364  | 1.45E-165 | Other-RLK | same      |
| At_RLM1a       | TNL       | Lal | LA_C58557_1        | 61.869 | 396  | 5   | 399  | 4.98E-170 | TN        | different |
| At_RPP2a       | TNL       | Lal | LA_C60571_1        | 62.85  | 428  | 10  | 414  | 4.91E-173 | Other-NLR | different |
| At_RPP2a       | TNL       | Lal | LA_scaffold512_4   | 63.3   | 406  | 9   | 414  | 1.41E-173 | TNL       | same      |
| At_RPP2a       | TNL       | Lal | LA_C64493_1        | 65.926 | 405  | 10  | 414  | 1.27E-178 | TNL       | same      |
| At_BAK1        | LRR-RLK   | Lal | LA_scaffold1550_50 | 89.431 | 615  | 1   | 615  | 0         | LRR-RLK   | same      |
| At_PBS1        | Other-RLK | Lal | LA_scaffold3472_4  | 86.653 | 487  | 1   | 456  | 0         | Other-RLK | same      |
| At_RFO1        | Other-RLK | Lal | LA_scaffold1187_3  | 83.134 | 753  | 2   | 751  | 0         | Other-RLK | same      |
| At_RPM1        | NL        | Lal | LA_scaffold698_109 | 83.047 | 932  | 1   | 926  | 0         | NL        | same      |
| At_SOBR1       | LRR-RLK   | Lal | LA_scaffold151_27  | 82.893 | 643  | 1   | 641  | 0         | LRR-RLK   | same      |
| At_RPS2        | NL        | Lal | LA_scaffold2413_6  | 82.34  | 889  | 21  | 909  | 0         | CNL       | different |
| At_FLS2        | LRR-RLK   | Lal | LA_scaffold1430_19 | 80.645 | 1178 | 1   | 1173 | 0         | LRR-RLK   | same      |
| At_RLP1        | LRR-RLP   | Lal | LA_scaffold863_6   | 80.223 | 1077 | 1   | 1076 | 0         | LRR-RLP   | same      |
| At_BAK1        | LRR-RLK   | Lal | LA_scaffold3434_1  | 78.025 | 628  | 1   | 615  | 0         | LRR-RLK   | same      |
| At_RLP32       | LRR-RLP   | Lal | LA_scaffold611_46  | 76.896 | 857  | 1   | 854  | 0         | LRR-RLP   | same      |
| At_BAK1        | LRR-RLK   | Lal | LA_scaffold1533_74 | 73.333 | 615  | 23  | 615  | 0         | LRR-RLK   | same      |
| At_RFO3        | Other-RLK | Lal | LA_scaffold1835_9  | 70.366 | 874  | 4   | 850  | 0         | Other-RLK | same      |
| At_WRR4b       | TNL       | Lal | LA_scaffold1320_11 | 70.091 | 1100 | 1   | 1096 | 0         | TNL       | same      |
| At_RFO3        | Other-RLK | Lal | LA_scaffold1710_47 | 69.586 | 628  | 234 | 850  | 0         | Other-RLK | same      |
| At_NGR1a       | RNL       | Lal | LA_scaffold1324_6  | 69.25  | 813  | 1   | 807  | 0         | NL        | different |
| At_RFO2        | LRR-RLP   | Lal | LA_scaffold869_19  | 68.716 | 732  | 17  | 748  | 0         | LRR-RLK   | different |
| At_RLP32       | LRR-RLP   | Lal | LA_scaffold1263_3  | 68.39  | 851  | 9   | 854  | 0         | LRR-RLP   | same      |
| At_RPP13       | CNL       | Lal | LA_scaffold1596_7  | 67.596 | 861  | 1   | 830  | 0         | CNL       | same      |
| At_RFO2        | LRR-RLP   | Lal | LA_scaffold402_9   | 67.475 | 701  | 20  | 718  | 0         | LRR-RLP   | same      |
| At_RPP13       | CNL       | Lal | LA_scaffold1511_29 | 67.015 | 861  | 1   | 830  | 0         | NL        | different |
| At_RPP39       | CNL       | Lal | LA_scaffold903_5   | 66.712 | 736  | 145 | 871  | 0         | NL        | different |
| At_RLM1b       | TNL       | Lal | LA_C66795_2        | 65.774 | 1008 | 1   | 999  | 0         | TNL       | same      |
| At_RLP23       | LRR-RLP   | Lal | LA_scaffold49_15   | 65.49  | 878  | 1   | 874  | 0         | LRR-RLP   | same      |
| At_RFO1        | Other-RLK | Lal | LA_scaffold2496_3  | 65.442 | 735  | 1   | 718  | 0         | Other-RLK | same      |
| At_NGR1a       | RNL       | Lal | LA_scaffold653_3   | 64.691 | 810  | 12  | 809  | 0         | NL        | different |
| At_RAC1        | TNL       | Lal | LA_scaffold49_1    | 64.638 | 608  | 160 | 762  | 0         | NL        | different |
| At_WRR8        | TNL       | Lal | LA_scaffold49_1    | 64.521 | 606  | 170 | 769  | 0         | NL        | different |
| At_RLP42       | LRR-RLP   | Lal | LA_scaffold49_15   | 64.376 | 873  | 1   | 868  | 0         | LRR-RLP   | same      |
| At_WRR4a       | TNL       | Lal | LA_scaffold1320_11 | 64.087 | 1008 | 1   | 1000 | 0         | TNL       | same      |
| At_WRR8        | TNL       | Lal | LA_scaffold968_13  | 64.061 | 1113 | 12  | 1103 | 0         | TNL       | same      |
| At_NGR1b       | RNL       | Lal | LA_scaffold1324_6  | 63.98  | 819  | 5   | 812  | 0         | NL        | different |
| At_RLP23       | LRR-RLP   | Lal | LA_scaffold659_19  | 63.877 | 717  | 175 | 889  | 0         | LRR-RLP   | same      |
| At_NGR1b       | RNL       | Lal | LA_scaffold1143_11 | 63.625 | 822  | 3   | 815  | 0         | NL        | different |
| At_RLM1a       | TNL       | Lal | LA_scaffold2290_11 | 63.177 | 831  | 16  | 845  | 0         | TNL       | same      |
| At_RLP23       | LRR-RLP   | Lal | LA_scaffold1437_44 | 63.04  | 717  | 175 | 889  | 0         | LRR-RLP   | same      |
| Bna_LepR3/Rlm2 | LRR-RLP   | Lal | LA_scaffold611_46  | 63.038 | 744  | 204 | 943  | 0         | LRR-RLP   | same      |
| At_RPP13       | CNL       | Lal | LA_scaffold1596_4  | 62.85  | 856  | 1   | 828  | 0         | CNL       | same      |
| At_RAC1        | TNL       | Lal | LA_scaffold1515_10 | 62.549 | 510  | 1   | 510  | 0         | TN        | different |
| Bna_LepR3/Rlm2 | LRR-RLP   | Lal | LA_scaffold846_9   | 62.474 | 978  | 9   | 943  | 0         | LRR-RLP   | same      |
| At_RPP1        | TNL       | Lal | LA_scaffold76_6    | 62.332 | 446  | 66  | 509  | 0         | TNL       | same      |
| At_WRR4b       | TNL       | Lal | LA_scaffold345_4   | 62.234 | 940  | 160 | 1061 | 0         | TNL       | same      |
| Bna_LepR3/Rlm2 | LRR-RLP   | Lal | LA_scaffold1263_3  | 62.234 | 752  | 201 | 949  | 0         | LRR-RLP   | same      |
| At_RLM1a       | TNL       | Lal | LA_scaffold1058_13 | 62.202 | 1008 | 1   | 995  | 0         | TNL       | same      |
| At_RAC1        | TNL       | Lal | LA_scaffold968_13  | 62.118 | 1114 | 1   | 1103 | 0         | TNL       | same      |
| At_RLP42       | LRR-RLP   | Lal | LA_scaffold659_19  | 61.859 | 721  | 182 | 889  | 0         | LRR-RLP   | same      |
| At_ADR1        | NL        | Lal | LA_scaffold2239_11 | 61.798 | 801  | 6   | 787  | 0         | NL        | same      |
| At_RLM1b       | TNL       | Lal | LA_scaffold2290_11 | 61.638 | 1001 | 16  | 1010 | 0         | TNL       | same      |
| At_RLP32       | LRR-RLP   | Lal | LA_scaffold846_9   | 61.461 | 794  | 95  | 860  | 0         | LRR-RLP   | same      |
| At_RLM1b       | TNL       | Lal | LA_scaffold2356_5  | 61.424 | 1011 | 11  | 996  | 0         | TNL       | same      |
| At_WRR8        | TNL       | Lal | LA_scaffold1515_10 | 61.417 | 508  | 12  | 519  | 0         | TN        | different |



|                |           |     |                           |        |      |     |      |           |           |           |
|----------------|-----------|-----|---------------------------|--------|------|-----|------|-----------|-----------|-----------|
| At_NGR1a       | RNL       | Lal | LA_scaffold1143_11        | 61.389 | 821  | 1   | 809  | 0         | NL        | different |
| Bol_FocBo1     | TNL       | Lal | LA_C64493_1               | 61.245 | 707  | 8   | 711  | 0         | TNL       | same      |
| At_RLP42       | LRR-RLP   | Lal | LA_scaffold1437_44        | 60.779 | 719  | 182 | 889  | 0         | LRR-RLP   | same      |
| At_RFO1        | Other-RLK | Lal | LA_scaffold2496_4         | 60.53  | 755  | 6   | 746  | 0         | Other-RLK | same      |
| At_ADR1        | NL        | Lal | LA_scaffold2735_1         | 60.358 | 782  | 11  | 764  | 0         | NL        | same      |
| At_WRR4a       | TNL       | Lal | LA_scaffold345_4          | 60.142 | 848  | 159 | 997  | 0         | TNL       | same      |
| At_RPP7        | NL        | Lme | evm.model.scaffold111.350 | 62.667 | 150  | 996 | 1136 | 4.15E-47  | NL        | same      |
| At_RPP2a       | TNL       | Lme | evm.model.scaffold28.210  | 61.438 | 153  | 262 | 414  | 1.03E-51  | NL        | different |
| At_RFO1        | Other-RLK | Lme | evm.model.scaffold295.404 | 62.821 | 156  | 310 | 465  | 4.78E-52  | Other-RLK | same      |
| At_NGR1b       | RNL       | Lme | evm.model.scaffold284.34  | 66.892 | 148  | 326 | 472  | 1.46E-54  | NL        | different |
| At_RPS5        | TNL       | Lme | evm.model.scaffold310.40  | 67.55  | 151  | 120 | 270  | 2.81E-56  | NBS       | different |
| At_RPP2a       | TNL       | Lme | evm.model.scaffold81.428  | 63.03  | 165  | 250 | 414  | 8.04E-59  | NL        | different |
| At_NGR1a       | RNL       | Lme | evm.model.scaffold284.34  | 70.47  | 149  | 320 | 467  | 6.37E-60  | NL        | different |
| Bna_LepR3/Rlm2 | LRR-RLP   | Lme | evm.model.scaffold482.173 | 64.324 | 185  | 760 | 943  | 1.30E-60  | LRR-RLP   | same      |
| At_RLP32       | LRR-RLP   | Lme | evm.model.scaffold482.173 | 68.571 | 175  | 677 | 850  | 5.45E-63  | LRR-RLP   | same      |
| Bna_LepR3/Rlm2 | LRR-RLP   | Lme | evm.model.scaffold223.186 | 65.385 | 182  | 743 | 924  | 1.07E-64  | LRR-RLP   | same      |
| At_RLP30       | LRR-RLP   | Lme | evm.model.scaffold26.340  | 63.978 | 186  | 585 | 768  | 1.30E-67  | LRR-RLP   | same      |
| Bna_Rlm9/4/7   | Other-RLK | Lme | evm.model.scaffold356.593 | 60.28  | 214  | 396 | 608  | 4.10E-71  | Other-RLK | same      |
| At_RLP32       | LRR-RLP   | Lme | evm.model.scaffold494.52  | 65.079 | 189  | 660 | 847  | 1.75E-71  | LRR-RLP   | same      |
| Bna_LepR3/Rlm2 | LRR-RLP   | Lme | evm.model.scaffold494.52  | 63.874 | 191  | 743 | 932  | 1.11E-71  | LRR-RLP   | same      |
| At_RLP30       | LRR-RLP   | Lme | evm.model.scaffold26.341  | 61.792 | 212  | 562 | 772  | 6.63E-73  | LRR-RLP   | same      |
| Bna_Rlm9/4/7   | Other-RLK | Lme | evm.model.scaffold830.322 | 68.478 | 184  | 354 | 530  | 4.92E-73  | Other-RLK | same      |
| At_RLM1b       | TNL       | Lme | evm.model.scaffold452.106 | 64.894 | 188  | 241 | 421  | 1.27E-73  | NBS       | different |
| At_RLP32       | LRR-RLP   | Lme | evm.model.scaffold223.186 | 72.472 | 178  | 662 | 839  | 2.34E-74  | LRR-RLP   | same      |
| At_RPP39       | CNL       | Lme | evm.model.scaffold50.62   | 65.174 | 201  | 323 | 522  | 3.84E-78  | NBS       | different |
| At_RLP30       | LRR-RLP   | Lme | evm.model.scaffold53.617  | 66.667 | 198  | 580 | 777  | 5.39E-84  | LRR-RLP   | same      |
| At_RLP30       | LRR-RLP   | Lme | evm.model.scaffold625.49  | 68.78  | 205  | 577 | 781  | 7.55E-86  | LRR-RLP   | same      |
| At_RAC1        | TNL       | Lme | evm.model.scaffold891.92  | 63.672 | 256  | 158 | 413  | 2.58E-89  | NBS       | different |
| At_WRR8        | TNL       | Lme | evm.model.scaffold891.92  | 63.672 | 256  | 168 | 423  | 2.22E-92  | NBS       | different |
| Bna_LepR3/Rlm2 | LRR-RLP   | Lme | evm.model.scaffold695.418 | 64.317 | 227  | 718 | 943  | 2.14E-92  | LRR-RLP   | same      |
| At_RFO1        | Other-RLK | Lme | evm.model.scaffold356.593 | 76.923 | 234  | 343 | 575  | 1.13E-93  | Other-RLK | same      |
| At_WRR12       | TNL       | Lme | evm.model.scaffold95.272  | 60.357 | 280  | 11  | 288  | 1.08E-94  | TNL       | same      |
| At_RFO3        | Other-RLK | Lme | evm.model.scaffold10.670  | 60.853 | 258  | 495 | 748  | 5.73E-97  | Other-RLK | same      |
| At_RPP8        | CNL       | Lme | evm.model.scaffold490.31  | 65.164 | 244  | 168 | 411  | 3.37E-98  | CN        | different |
| At_RPP39       | CNL       | Lme | evm.model.scaffold111.249 | 65.126 | 238  | 359 | 595  | 1.70E-102 | NL        | different |
| At_WRR9        | NL        | Lme | evm.model.scaffold550.75  | 62.934 | 259  | 309 | 566  | 9.50E-105 | NBS       | different |
| At_RLP32       | LRR-RLP   | Lme | evm.model.scaffold695.418 | 73.303 | 221  | 634 | 854  | 7.49E-109 | LRR-RLP   | same      |
| At_RLM1a       | TNL       | Lme | evm.model.scaffold550.75  | 63.813 | 257  | 305 | 560  | 1.16E-109 | NBS       | different |
| At_RFO1        | Other-RLK | Lme | evm.model.scaffold356.593 | 69.112 | 259  | 11  | 269  | 1.35E-113 | Other-RLK | same      |
| At_RPP8        | CNL       | Lme | evm.model.scaffold234.80  | 61.032 | 349  | 560 | 907  | 5.80E-115 | CNL       | same      |
| Bna_LepR3/Rlm2 | LRR-RLP   | Lme | evm.model.scaffold482.174 | 62.145 | 317  | 624 | 937  | 1.56E-118 | LRR-RLP   | same      |
| At_RLM1b       | TNL       | Lme | evm.model.scaffold550.75  | 70.498 | 261  | 305 | 565  | 1.44E-121 | NBS       | different |
| At_RPP8        | CNL       | Lme | evm.model.scaffold96.54   | 65.399 | 263  | 210 | 468  | 6.90E-122 | NBS       | different |
| Bna_LepR3/Rlm2 | LRR-RLP   | Lme | evm.model.scaffold339.145 | 61.716 | 303  | 641 | 943  | 5.73E-122 | LRR-RLP   | same      |
| At_RPS2        | NL        | Lme | evm.model.scaffold384.356 | 82.353 | 221  | 301 | 521  | 3.12E-123 | NBS       | different |
| At_RLP32       | LRR-RLP   | Lme | evm.model.scaffold482.174 | 63.636 | 319  | 537 | 852  | 1.49E-124 | LRR-RLP   | same      |
| At_BAK1        | LRR-RLK   | Lme | evm.model.scaffold928.81  | 71.042 | 259  | 326 | 584  | 2.40E-127 | LRR-RLK   | same      |
| Bna_Rlm9/4/7   | Other-RLK | Lme | evm.model.scaffold275.24  | 62.426 | 338  | 312 | 644  | 3.74E-129 | Other-RLK | same      |
| At_PBS1        | Other-RLK | Lme | evm.model.scaffold306.22  | 63.607 | 305  | 61  | 364  | 2.00E-133 | Other-RLK | same      |
| At_PBS1        | Other-RLK | Lme | evm.model.scaffold785.113 | 74.902 | 255  | 111 | 364  | 4.07E-135 | Other-RLK | same      |
| At_RPS5        | TNL       | Lme | evm.model.scaffold384.134 | 62.5   | 352  | 135 | 486  | 3.48E-145 | NBS       | different |
| At_RPP39       | CNL       | Lme | evm.model.scaffold195.22  | 61.765 | 408  | 471 | 869  | 4.14E-146 | CNL       | same      |
| At_RPS5        | TNL       | Lme | evm.model.scaffold50.88   | 60.934 | 407  | 1   | 407  | 1.12E-148 | CNL       | different |
| At_RPP39       | CNL       | Lme | evm.model.scaffold971.3   | 68.038 | 316  | 1   | 315  | 4.37E-149 | CN        | different |
| At_RPP7        | NL        | Lme | evm.model.scaffold482.72  | 62.864 | 412  | 458 | 866  | 2.66E-149 | NL        | same      |
| At_NGR1b       | RNL       | Lme | evm.model.scaffold113.778 | 62.35  | 417  | 406 | 815  | 1.82E-149 | CNL       | different |
| At_RPS5        | TNL       | Lme | evm.model.scaffold50.115  | 61.481 | 405  | 1   | 405  | 3.05E-155 | CNL       | different |
| Bna_Rlm9/4/7   | Other-RLK | Lme | evm.model.scaffold550.39  | 61.408 | 412  | 159 | 568  | 1.22E-157 | Other-RLK | same      |
| At_RPP7        | NL        | Lme | evm.model.scaffold482.72  | 62.924 | 383  | 1   | 382  | 9.83E-160 | NL        | same      |
| At_NGR1a       | RNL       | Lme | evm.model.scaffold113.778 | 65.459 | 414  | 404 | 809  | 1.11E-160 | CNL       | different |
| Bna_Rlm9/4/7   | Other-RLK | Lme | evm.model.scaffold855.38  | 63.504 | 411  | 127 | 530  | 4.91E-163 | Other-RLK | same      |
| At_PBS1        | Other-RLK | Lme | evm.model.scaffold830.589 | 70     | 310  | 71  | 378  | 5.06E-164 | Other-RLK | same      |
| At_NGR1b       | RNL       | Lme | evm.model.scaffold352.97  | 61.779 | 416  | 406 | 815  | 1.34E-164 | CNL       | different |
| Bna_LepR3/Rlm2 | LRR-RLP   | Lme | evm.model.scaffold384.176 | 63.333 | 420  | 515 | 928  | 3.78E-169 | LRR-RLP   | same      |
| At_RPP39       | CNL       | Lme | evm.model.scaffold268.9   | 72.121 | 330  | 1   | 330  | 3.22E-171 | CNL       | same      |
| At_RPP39       | CNL       | Lme | evm.model.scaffold195.22  | 64.128 | 407  | 1   | 405  | 2.80E-172 | CNL       | same      |
| At_RLP32       | LRR-RLP   | Lme | evm.model.scaffold191.290 | 61.785 | 437  | 418 | 854  | 2.76E-175 | LRR-RLP   | same      |
| At_NGR1a       | RNL       | Lme | evm.model.scaffold352.97  | 65.459 | 414  | 404 | 809  | 1.37E-177 | CNL       | different |
| At_RPS2        | NL        | Lme | evm.model.scaffold3866.2  | 80.872 | 298  | 192 | 489  | 2.24E-178 | NBS       | different |
| At_RPS2        | NL        | Lme | evm.model.scaffold482.7   | 81.879 | 298  | 192 | 489  | 1.99E-179 | NBS       | different |
| At_BAK1        | LRR-RLK   | Lme | evm.model.scaffold675.276 | 96.748 | 615  | 1   | 615  | 0         | LRR-RLK   | same      |
| At_BAK1        | LRR-RLK   | Lme | evm.model.scaffold95.14   | 96.748 | 615  | 1   | 615  | 0         | LRR-RLK   | same      |
| At_BAK1        | LRR-RLK   | Lme | evm.model.scaffold236.905 | 96.423 | 615  | 1   | 615  | 0         | LRR-RLK   | same      |
| At_BAK1        | LRR-RLK   | Lme | evm.model.scaffold70.479  | 95.772 | 615  | 1   | 615  | 0         | LRR-RLK   | same      |
| At_PBS1        | Other-RLK | Lme | evm.model.scaffold98.135  | 88.641 | 493  | 1   | 456  | 0         | Other-RLK | same      |
| At_RFO1        | Other-RLK | Lme | evm.model.scaffold53.735  | 82.699 | 578  | 1   | 575  | 0         | Other-RLK | same      |
| At_FLS2        | LRR-RLK   | Lme | evm.model.scaffold115.6   | 81.841 | 1173 | 4   | 1173 | 0         | LRR-RLK   | same      |
| At_FLS2        | LRR-RLK   | Lme | evm.model.scaffold369.118 | 81.159 | 1173 | 4   | 1173 | 0         | LRR-RLK   | same      |
| At_SOBR1       | LRR-RLK   | Lme | evm.model.scaffold185.309 | 79.953 | 429  | 41  | 468  | 0         | LRR-RLK   | same      |
| At_SOBR1       | LRR-RLK   | Lme | evm.model.scaffold146.494 | 79.751 | 642  | 1   | 641  | 0         | LRR-RLK   | same      |
| At_SOBR1       | LRR-RLK   | Lme | evm.model.scaffold110.60  | 79.595 | 642  | 1   | 641  | 0         | LRR-RLK   | same      |
| At_RPS4        | TNL       | Lme | evm.model.scaffold242.956 | 79.319 | 1233 | 1   | 1209 | 0         | TNL       | same      |
| At_RPS2        | NL        | Lme | evm.model.scaffold297.2   | 79.098 | 909  | 1   | 909  | 0         | CNL       | different |
| At_BAK1        | LRR-RLK   | Lme | evm.model.scaffold117.318 | 77.578 | 611  | 9   | 614  | 0         | LRR-RLK   | same      |
| At_BAK1        | LRR-RLK   | Lme | evm.model.scaffold265.342 | 75.929 | 619  | 9   | 615  | 0         | LRR-RLK   | same      |
| At_RPS2        | NL        | Lme | evm.model.scaffold26.219  | 75.527 | 617  | 293 | 909  | 0         | NL        | same      |

|                |           |     |                           |        |     |     |      |          |           |           |
|----------------|-----------|-----|---------------------------|--------|-----|-----|------|----------|-----------|-----------|
| At_BAK1        | LRR-RLK   | Lme | evm.model.scaffold428.149 | 75.453 | 607 | 9   | 615  | 0        | LRR-RLK   | same      |
| At_RPS2        | NL        | Lme | evm.model.scaffold136.39  | 74.807 | 909 | 1   | 909  | 0        | CNL       | different |
| At_RFO3        | Other-RLK | Lme | evm.model.scaffold345.4   | 74.769 | 864 | 1   | 849  | 0        | Other-RLK | same      |
| At_BAK1        | LRR-RLK   | Lme | evm.model.scaffold216.149 | 74.516 | 620 | 9   | 615  | 0        | LRR-RLK   | same      |
| At_BAK1        | LRR-RLK   | Lme | evm.model.scaffold34.49   | 74.424 | 434 | 29  | 450  | 0        | LRR-RLK   | same      |
| At_BAK1        | LRR-RLK   | Lme | evm.model.scaffold195.513 | 72.231 | 605 | 24  | 615  | 0        | LRR-RLK   | same      |
| At_BAK1        | LRR-RLK   | Lme | evm.model.scaffold57.15   | 72.231 | 605 | 24  | 615  | 0        | LRR-RLK   | same      |
| At_BAK1        | LRR-RLK   | Lme | evm.model.scaffold1220.2  | 71.901 | 605 | 24  | 615  | 0        | LRR-RLK   | same      |
| At_BAK1        | LRR-RLK   | Lme | evm.model.scaffold339.194 | 71.122 | 606 | 9   | 612  | 0        | LRR-RLK   | same      |
| Bna_MPK9       | Other-RLK | Lme | evm.model.scaffold80.44   | 70.921 | 478 | 100 | 562  | 0        | Other-RLK | same      |
| At_NGR1a       | RNL       | Lme | evm.model.scaffold113.778 | 70.777 | 811 | 4   | 806  | 0        | CNL       | different |
| At_RPP2b       | TNL       | Lme | evm.model.scaffold36.157  | 70.757 | 489 | 719 | 1207 | 0        | CNL       | different |
| At_NGR1a       | RNL       | Lme | evm.model.scaffold52.101  | 69.89  | 817 | 1   | 809  | 0        | NL        | different |
| At_RFO2        | LRR-RLP   | Lme | evm.model.scaffold57.64   | 69.608 | 714 | 24  | 737  | 0        | LRR-RLK   | different |
| Bna_Rlm9/4/7   | Other-RLK | Lme | evm.model.scaffold1108.2  | 69.588 | 388 | 217 | 603  | 0        | Other-RLK | same      |
| At_RPS4        | TNL       | Lme | evm.model.scaffold468.461 | 69.546 | 903 | 1   | 892  | 0        | Other-NLR | different |
| At_RPP39       | CNL       | Lme | evm.model.scaffold297.20  | 69.531 | 384 | 1   | 383  | 0        | CN        | different |
| At_RFO2        | LRR-RLP   | Lme | evm.model.scaffold646.66  | 69.517 | 725 | 24  | 748  | 0        | LRR-RLK   | different |
| At_RPP39       | CNL       | Lme | evm.model.scaffold136.126 | 69.021 | 878 | 1   | 868  | 0        | CNL       | same      |
| At_BAK1        | LRR-RLK   | Lme | evm.model.scaffold565.260 | 68.982 | 619 | 9   | 615  | 0        | LRR-RLK   | same      |
| At_RPP39       | CNL       | Lme | evm.model.scaffold482.70  | 68.558 | 617 | 1   | 616  | 0        | CNL       | same      |
| At_RFO2        | LRR-RLP   | Lme | evm.model.scaffold34.95   | 68.516 | 721 | 28  | 748  | 0        | LRR-RLK   | different |
| At_NGR1a       | RNL       | Lme | evm.model.scaffold352.98  | 68.254 | 819 | 1   | 809  | 0        | NL        | different |
| At_RLP32       | LRR-RLP   | Lme | evm.model.scaffold384.176 | 67.857 | 420 | 428 | 840  | 0        | LRR-RLP   | same      |
| At_RFO2        | LRR-RLP   | Lme | evm.model.scaffold299.729 | 66.899 | 716 | 28  | 743  | 0        | LRR-RLP   | same      |
| At_RFO2        | LRR-RLP   | Lme | evm.model.scaffold245.123 | 66.197 | 710 | 28  | 737  | 0        | LRR-RLP   | same      |
| At_RFO2        | LRR-RLP   | Lme | evm.model.scaffold937.13  | 65.994 | 694 | 49  | 740  | 0        | LRR-RLP   | same      |
| At_NGR1b       | RNL       | Lme | evm.model.scaffold113.778 | 65.693 | 822 | 3   | 812  | 0        | CNL       | different |
| At_NGR1b       | RNL       | Lme | evm.model.scaffold52.101  | 65.69  | 819 | 6   | 812  | 0        | NL        | different |
| At_RPP39       | CNL       | Lme | evm.model.scaffold111.241 | 65.65  | 754 | 42  | 786  | 0        | CNL       | same      |
| At_RPP8        | CNL       | Lme | evm.model.scaffold1913.8  | 65.57  | 912 | 1   | 908  | 0        | CNL       | same      |
| At_RPP8        | CNL       | Lme | evm.model.scaffold433.231 | 64.803 | 912 | 1   | 904  | 0        | CNL       | same      |
| At_RLP23       | LRR-RLP   | Lme | evm.model.scaffold146.396 | 64.575 | 717 | 175 | 889  | 0        | LRR-RLP   | same      |
| At_RPP8        | CNL       | Lme | evm.model.scaffold81.519  | 64.388 | 907 | 1   | 903  | 0        | CNL       | same      |
| At_RLM1b       | TNL       | Lme | evm.model.scaffold111.71  | 63.614 | 830 | 164 | 986  | 0        | NL        | different |
| At_RPP7        | NL        | Lme | evm.model.scaffold136.111 | 63.563 | 870 | 1   | 866  | 0        | NL        | same      |
| At_RLM1b       | TNL       | Lme | evm.model.scaffold26.115  | 63.561 | 719 | 305 | 1013 | 0        | NL        | different |
| At_NGR1b       | RNL       | Lme | evm.model.scaffold352.98  | 63.471 | 824 | 3   | 812  | 0        | NL        | different |
| At_RLP23       | LRR-RLP   | Lme | evm.model.scaffold237.28  | 63.395 | 866 | 27  | 890  | 0        | LRR-RLP   | same      |
| At_RPP39       | CNL       | Lme | evm.model.scaffold111.242 | 63.355 | 906 | 1   | 883  | 0        | CNL       | same      |
| At_RPP39       | CNL       | Lme | evm.model.scaffold550.77  | 62.812 | 882 | 1   | 868  | 0        | CNL       | same      |
| At_RLP42       | LRR-RLP   | Lme | evm.model.scaffold146.396 | 62.657 | 715 | 182 | 889  | 0        | LRR-RLP   | same      |
| At_RPP39       | CNL       | Lme | evm.model.scaffold111.242 | 62.5   | 880 | 7   | 877  | 0        | CNL       | same      |
| Bna_Rlm9/4/7   | Other-RLK | Lme | evm.model.scaffold384.36  | 62.264 | 583 | 40  | 611  | 0        | Other-RLK | same      |
| At_RLP42       | LRR-RLP   | Lme | evm.model.scaffold237.28  | 62.251 | 853 | 33  | 880  | 0        | LRR-RLP   | same      |
| At_RLP32       | LRR-RLP   | Lme | evm.model.scaffold316.302 | 62.195 | 492 | 362 | 849  | 0        | LRR-RLP   | same      |
| Bna_Rlm9/4/7   | Other-RLK | Lme | evm.model.scaffold384.39  | 61.864 | 590 | 22  | 604  | 0        | Other-RLK | same      |
| At_RLM1b       | TNL       | Lme | evm.model.scaffold34.933  | 61.725 | 742 | 249 | 979  | 0        | NL        | different |
| Bna_LepR3/Rlm2 | LRR-RLP   | Lme | evm.model.scaffold306.586 | 61.721 | 674 | 271 | 939  | 0        | LRR-RLP   | same      |
| At_ADR1        | NL        | Lme | evm.model.scaffold60.203  | 61.557 | 809 | 6   | 778  | 0        | NL        | same      |
| At_RLM1b       | TNL       | Lme | evm.model.scaffold971.193 | 61.406 | 754 | 257 | 999  | 0        | NL        | different |
| Bna_Rlm9/4/7   | Other-RLK | Lme | evm.model.scaffold913.30  | 61.368 | 585 | 22  | 600  | 0        | Other-RLK | same      |
| At_ADR1        | NL        | Lme | evm.model.scaffold219.287 | 61.125 | 818 | 6   | 787  | 0        | NL        | same      |
| At_RLP32       | LRR-RLP   | Lme | evm.model.scaffold339.98  | 61.12  | 643 | 211 | 844  | 0        | LRR-RLP   | same      |
| Bna_LepR3/Rlm2 | LRR-RLP   | Lme | evm.model.scaffold117.254 | 60.65  | 892 | 55  | 941  | 0        | LRR-RLP   | same      |
| Bna_LepR3/Rlm2 | LRR-RLP   | Lme | evm.model.scaffold339.98  | 60.62  | 645 | 300 | 931  | 0        | LRR-RLP   | same      |
| At_RLP32       | LRR-RLP   | Lme | evm.model.scaffold306.586 | 60.597 | 670 | 186 | 854  | 0        | LRR-RLP   | same      |
| Bna_Rlm9/4/7   | Other-RLK | Lme | evm.model.scaffold215.217 | 60.441 | 589 | 25  | 602  | 0        | Other-RLK | same      |
| At_RLP30       | LRR-RLP   | Lme | evm.model.scaffold29.153  | 60.219 | 729 | 43  | 770  | 0        | LRR-RLP   | same      |
| Bna_Rlm9/4/7   | Other-RLK | Lme | evm.model.scaffold29.81   | 60.202 | 593 | 25  | 612  | 0        | Other-RLK | same      |
| At_RLP32       | LRR-RLP   | Lme | evm.model.scaffold37.460  | 60.094 | 639 | 203 | 841  | 0        | LRR-RLP   | same      |
| At_RLM1b       | TNL       | Lme | evm.model.scaffold191.111 | 60.056 | 711 | 281 | 979  | 0        | NL        | different |
| At_RP55        | TNL       | Lme | evm.model.scaffold50.106  | 60.041 | 493 | 123 | 613  | 0        | NL        | different |
| At_RLP32       | LRR-RLP   | Lme | evm.model.scaffold384.175 | 60.035 | 568 | 281 | 842  | 0        | LRR-RLP   | same      |
| At_RPP39       | CNL       | Lme | evm.model.scaffold50.60   | 60.023 | 878 | 1   | 868  | 0        | CNL       | same      |
| At_RPP1        | TNL       | Rra | RrC20884_p1               | 62.838 | 148 | 94  | 241  | 1.79E-59 | TX        | different |
| At_RPP1        | TNL       | Rra | RrC26085_p1               | 68.243 | 148 | 94  | 241  | 1.78E-67 | TX        | different |
| At_RRS1        | TNL       | Rra | RrC2503_p1                | 66.667 | 198 | 527 | 717  | 1.52E-70 | TNL       | same      |
| At_RFO3        | Other-RLK | Rra | RrC28417_p1               | 62.921 | 178 | 515 | 692  | 1.40E-73 | Other-RLK | same      |
| At_BAK1        | LRR-RLK   | Rra | RrC14965_p2               | 78     | 150 | 231 | 376  | 3.43E-76 | Other-RLK | different |
| At_RLP32       | LRR-RLP   | Rra | RrC21259_p1               | 62.632 | 190 | 663 | 852  | 8.94E-77 | LRR-RLP   | same      |
| Bra_Crr1a      | TNL       | Rra | RrC2202_p3                | 61.187 | 219 | 50  | 266  | 3.55E-80 | TX        | different |
| Bna_Rlm9/4/7   | Other-RLK | Rra | RrC912_p3                 | 68.528 | 197 | 542 | 738  | 2.15E-83 | Other-RLK | same      |
| Bra_Crr1a      | TNL       | Rra | RrC4724_p4                | 60.909 | 220 | 60  | 279  | 1.36E-84 | TX        | different |
| At_RPP1        | TNL       | Rra | RrC2202_p3                | 62.115 | 227 | 70  | 294  | 5.83E-86 | TX        | different |
| At_BAK1        | LRR-RLK   | Rra | RrC12485_p2               | 66.502 | 203 | 381 | 583  | 1.55E-89 | LRR-RLK   | same      |
| Bna_Rlm9/4/7   | Other-RLK | Rra | RrC502_p1                 | 65.66  | 265 | 531 | 793  | 1.71E-90 | Other-RLK | same      |
| Bna_Rlm9/4/7   | Other-RLK | Rra | RrC502_p1                 | 66.791 | 268 | 527 | 793  | 1.35E-90 | Other-RLK | same      |
| At_RFO1        | Other-RLK | Rra | RrC502_p1                 | 61.479 | 257 | 500 | 750  | 2.22E-92 | Other-RLK | same      |
| At_RFO1        | Other-RLK | Rra | RrC912_p3                 | 75.13  | 193 | 515 | 705  | 1.59E-92 | Other-RLK | same      |
| Bra_cRa/cRb    | TNL       | Rra | RrC9740_p1                | 61.847 | 249 | 73  | 320  | 7.60E-93 | TNL       | same      |
| At_RPP2a       | TNL       | Rra | RrC12579_p1               | 60.573 | 279 | 136 | 414  | 1.48E-93 | TNL       | same      |
| At_RPP2a       | TNL       | Rra | RrC1201_p4                | 66.667 | 222 | 193 | 414  | 1.47E-93 | NL        | different |
| At_RFO1        | Other-RLK | Rra | RrC502_p1                 | 60.294 | 272 | 486 | 751  | 2.72E-94 | Other-RLK | same      |
| Bra_cRa/cRb    | TNL       | Rra | RrC10317_p3               | 60.87  | 253 | 57  | 308  | 1.17E-94 | TX        | different |
| Bna_LepR3/Rlm2 | LRR-RLP   | Rra | RrC24229_p1               | 65.957 | 235 | 718 | 950  | 3.45E-96 | LRR-RLP   | same      |

|                |           |     |                         |        |     |      |      |           |           |           |
|----------------|-----------|-----|-------------------------|--------|-----|------|------|-----------|-----------|-----------|
| Bju_WRR1       | CNL       | Rra | RrC1918_p4              | 71.296 | 216 | 126  | 336  | 4.06E-98  | NL        | different |
| At_RPP8        | CNL       | Rra | RrC1918_p4              | 68.519 | 216 | 126  | 341  | 1.21E-99  | NL        | different |
| Bna_LepR3/Rlm2 | LRR-RLP   | Rra | RrC9458_p2              | 67.547 | 265 | 685  | 948  | 3.35E-102 | LRR-RLP   | same      |
| At_RLP42       | LRR-RLP   | Rra | RrC7403_p1              | 63.855 | 249 | 487  | 731  | 2.60E-102 | LRR-RLP   | same      |
| At_RLP32       | LRR-RLP   | Rra | RrC9458_p2              | 70.866 | 254 | 601  | 853  | 6.74E-105 | LRR-RLP   | same      |
| Bra_Crr1a      | TNL       | Rra | RrC10317_p3             | 64.286 | 252 | 53   | 303  | 4.33E-105 | TX        | different |
| Bra_Crr1a      | TNL       | Rra | RrC9740_p1              | 64.683 | 252 | 65   | 315  | 1.21E-105 | TNL       | same      |
| At_RPP1        | TNL       | Rra | RrC10317_p3             | 64.427 | 253 | 80   | 331  | 2.77E-108 | TX        | different |
| At_RLP23       | LRR-RLP   | Rra | RrC7403_p1              | 67.49  | 243 | 490  | 731  | 8.45E-109 | LRR-RLP   | same      |
| At_RLM1a       | TNL       | Rra | RrC25189_p1             | 64.364 | 275 | 350  | 621  | 2.73E-109 | TNL       | same      |
| At_RPP1        | TNL       | Rra | RrC9740_p1              | 65.079 | 252 | 93   | 343  | 2.02E-109 | TNL       | same      |
| At_RLM1b       | TNL       | Rra | RrC25189_p1             | 62.366 | 279 | 350  | 626  | 8.66E-110 | TNL       | same      |
| At_RPP2a       | TNL       | Rra | RrC11596_p1             | 66.787 | 277 | 138  | 414  | 9.81E-112 | NL        | different |
| At_RLP32       | LRR-RLP   | Rra | RrC24229_p1             | 75.676 | 222 | 634  | 854  | 1.88E-112 | LRR-RLP   | same      |
| At_RPP2a       | TNL       | Rra | RrC190_p1               | 65.188 | 293 | 1007 | 1299 | 1.03E-114 | TNL       | same      |
| At_RLP23       | LRR-RLP   | Rra | RrC30304_p1             | 64.151 | 318 | 290  | 607  | 3.02E-118 | LRR-RLP   | same      |
| At_RLP42       | LRR-RLP   | Rra | RrC30304_p1             | 65.015 | 323 | 291  | 612  | 1.24E-123 | LRR-RLP   | same      |
| At_ADR1        | NL        | Rra | RrC8290_p1              | 63.253 | 332 | 3    | 325  | 4.19E-133 | NBS       | different |
| At_RPP2a       | TNL       | Rra | RrC4901_p1              | 77.899 | 276 | 1025 | 1299 | 3.35E-138 | TX        | different |
| At_RPP8        | CNL       | Rra | RrC12445_p1             | 61.224 | 343 | 1    | 341  | 1.40E-138 | CN        | different |
| Bju_WRR1       | CNL       | Rra | RrC1918_p4              | 66.954 | 348 | 442  | 788  | 5.58E-142 | NL        | different |
| At_NGR1b       | RNL       | Rra | RrC30918_p1             | 63.818 | 351 | 218  | 558  | 8.82E-146 | NBS       | different |
| At_RLP42       | LRR-RLP   | Rra | RrC13278_p1             | 60.95  | 379 | 495  | 873  | 2.58E-151 | LRR-RLP   | same      |
| At_PBS1        | Other-RLK | Rra | RrC3989_p1              | 67.203 | 311 | 71   | 381  | 5.45E-158 | Other-RLK | same      |
| At_PBS1        | Other-RLK | Rra | RrC2330_p3              | 71.572 | 299 | 71   | 369  | 1.47E-158 | Other-RLK | same      |
| At_RLP23       | LRR-RLP   | Rra | RrC13278_p1             | 63.959 | 394 | 495  | 888  | 2.62E-162 | LRR-RLP   | same      |
| At_NGR1a       | RNL       | Rra | RrC30918_p1             | 72.206 | 349 | 216  | 552  | 1.23E-169 | NBS       | different |
| At_PBS1        | Other-RLK | Rra | RrC2463_p6              | 77.778 | 306 | 65   | 370  | 9.29E-174 | Other-RLK | same      |
| At_BAK1        | LRR-RLK   | Rra | RrC2766_p1              | 96.063 | 508 | 1    | 508  | 0         | LRR-RLK   | same      |
| Bol_FocBo1     | TNL       | Rra | RrC1201_p4              | 95.563 | 586 | 193  | 778  | 0         | NL        | different |
| At_BAK1        | LRR-RLK   | Rra | RrC645_p6               | 93.453 | 611 | 5    | 615  | 0         | LRR-RLK   | same      |
| At_RPS2        | NL        | Rra | RrC1874_p4              | 84.505 | 910 | 1    | 909  | 0         | CNL       | different |
| Bna_Rlm9/4/7   | Other-RLK | Rra | RrC858_p5               | 82.412 | 796 | 1    | 794  | 0         | Other-RLK | same      |
| At_BAK1        | LRR-RLK   | Rra | RrC345_p11              | 82.178 | 606 | 10   | 615  | 0         | LRR-RLK   | same      |
| At_RPM1        | NL        | Rra | RrC828_p2               | 82.12  | 934 | 1    | 926  | 0         | NL        | same      |
| At_SOBR1       | LRR-RLK   | Rra | RrC129_p7               | 80.371 | 647 | 1    | 640  | 0         | LRR-RLK   | same      |
| At_SOBR1       | LRR-RLK   | Rra | RrC10596_p2             | 79.888 | 358 | 284  | 641  | 0         | Other-RLK | different |
| At_WRR12       | TNL       | Rra | RrC2369_p3              | 78.414 | 681 | 372  | 1049 | 0         | TX        | different |
| At_RPS5        | TNL       | Rra | RrC20133_p1             | 78.219 | 730 | 1    | 730  | 0         | NL        | different |
| At_BAK1        | LRR-RLK   | Rra | RrC2772_p1              | 78.161 | 609 | 10   | 615  | 0         | LRR-RLK   | same      |
| Bna_LepR3/Rlm2 | LRR-RLP   | Rra | RrC1351_p1              | 77.708 | 951 | 1    | 945  | 0         | LRR-RLP   | same      |
| At_BAK1        | LRR-RLK   | Rra | RrC59_p5                | 77.346 | 618 | 24   | 615  | 0         | LRR-RLK   | same      |
| At_NGR1a       | RNL       | Rra | RrC2329_p4              | 77.017 | 818 | 1    | 809  | 0         | NL        | different |
| At_RPS5        | TNL       | Rra | RrC3583_p3              | 76.313 | 895 | 1    | 889  | 0         | NL        | different |
| At_RFO3        | Other-RLK | Rra | RrC4728_p1              | 75.793 | 851 | 19   | 850  | 0         | Other-RLK | same      |
| At_BAK1        | LRR-RLK   | Rra | RrC10357_p1             | 71.933 | 652 | 8    | 615  | 0         | LRR-RLK   | same      |
| At_RFO1        | Other-RLK | Rra | RrC22170_p1             | 70.615 | 667 | 96   | 751  | 0         | Other-RLK | same      |
| Bna_LepR3/Rlm2 | LRR-RLP   | Rra | RrC11009_p1             | 69.374 | 911 | 31   | 938  | 0         | LRR-RLP   | same      |
| At_RFO2        | LRR-RLP   | Rra | RrC7931_p1              | 68.511 | 705 | 33   | 737  | 0         | LRR-RLK   | different |
| At_RFO2        | LRR-RLP   | Rra | RrC23063_p1             | 68.486 | 733 | 8    | 740  | 0         | LRR-RLP   | same      |
| At_NGR1b       | RNL       | Rra | RrC2329_p4              | 68.088 | 821 | 5    | 815  | 0         | NL        | different |
| At_RLP42       | LRR-RLP   | Rra | RrC10614_p1             | 67.614 | 880 | 1    | 876  | 0         | LRR-RLP   | same      |
| At_RPP8        | CNL       | Rra | RrC9934_p1              | 67.161 | 944 | 1    | 907  | 0         | CNL       | same      |
| At_RPP13       | CNL       | Rra | RrC1706_p2              | 66.585 | 814 | 1    | 789  | 0         | NL        | different |
| At_RPS5        | TNL       | Rra | RrC29576_p1             | 66.46  | 483 | 227  | 706  | 0         | NL        | different |
| At_RLP23       | LRR-RLP   | Rra | RrC10614_p1             | 66.069 | 893 | 1    | 890  | 0         | LRR-RLP   | same      |
| At_RFO2        | LRR-RLP   | Rra | RrC4219_p1              | 65.694 | 720 | 32   | 748  | 0         | LRR-RLK   | different |
| At_RFO2        | LRR-RLP   | Rra | RrC4575_p1              | 65.328 | 747 | 6    | 742  | 0         | LRR-RLP   | same      |
| At_RLP32       | LRR-RLP   | Rra | RrC2862_p1              | 64.933 | 750 | 118  | 865  | 0         | LRR-RLP   | same      |
| Bju_WRR1       | CNL       | Rra | RrC1918_p1              | 64.34  | 530 | 376  | 902  | 0         | NL        | different |
| At_RLM1a       | TNL       | Rra | RrC25117_p1             | 63.489 | 493 | 132  | 622  | 0         | TNL       | same      |
| At_RPP13       | CNL       | Rra | RrC1706_p3              | 63.244 | 857 | 1    | 829  | 0         | NL        | different |
| Bna_Rlm9/4/7   | Other-RLK | Rra | RrC25334_p1             | 63.189 | 508 | 159  | 660  | 0         | Other-RLK | same      |
| At_RLP23       | LRR-RLP   | Rra | RrC15950_p1             | 62.901 | 717 | 175  | 889  | 0         | LRR-RLP   | same      |
| At_RFO1        | Other-RLK | Rra | RrC5399_p1              | 62.881 | 722 | 7    | 712  | 0         | Other-RLK | same      |
| At_RPS5        | TNL       | Rra | RrC3098_p2              | 62.851 | 891 | 1    | 880  | 0         | CNL       | different |
| At_RFO1        | Other-RLK | Rra | RrC5399_p2              | 62.418 | 761 | 4    | 751  | 0         | Other-RLK | same      |
| At_WRR8        | TNL       | Rra | RrC13073_p2             | 62.397 | 609 | 170  | 769  | 0         | NL        | different |
| At_RLP42       | LRR-RLP   | Rra | RrC15950_p1             | 62.34  | 701 | 182  | 880  | 0         | LRR-RLP   | same      |
| At_RPP2a       | TNL       | Rra | RrC4901_p1              | 62.208 | 471 | 408  | 866  | 0         | TX        | different |
| At_ADR1        | NL        | Rra | RrC12655_p2             | 62.088 | 728 | 91   | 787  | 0         | NL        | same      |
| At_RLP32       | LRR-RLP   | Rra | RrC7190_p1              | 61.13  | 885 | 33   | 853  | 0         | LRR-RLP   | same      |
| At_RPS5        | TNL       | Rra | RrC2474_p3              | 60.992 | 887 | 1    | 881  | 0         | CNL       | different |
| At_RPP39       | CNL       | Rra | RrC197_p3               | 60.987 | 892 | 3    | 885  | 0         | CNL       | same      |
| At_RAC1        | TNL       | Rra | RrC409_p7               | 60.737 | 624 | 9    | 623  | 0         | TNL       | same      |
| At_WRR8        | TNL       | Rra | RrC409_p7               | 60.692 | 636 | 7    | 634  | 0         | TNL       | same      |
| At_RAC1        | TNL       | Rra | RrC13073_p2             | 60.362 | 608 | 160  | 760  | 0         | NL        | different |
| At_WRR9        | NL        | Rra | RrC25117_p1             | 60.324 | 494 | 136  | 627  | 0         | TNL       | different |
| At_RLP23       | LRR-RLP   | Rsa | Rsa1.0_00111.1_g00007.1 | 64.968 | 157 | 723  | 879  | 3.40E-60  | LRR-RLP   | same      |
| At_RLP30       | LRR-RLP   | Rsa | Rsa1.0_01839.1_g00004.1 | 62.162 | 185 | 602  | 786  | 2.53E-61  | LRR-RLP   | same      |
| At_RLP42       | LRR-RLP   | Rsa | Rsa1.0_00111.1_g00007.1 | 67.55  | 151 | 723  | 873  | 7.75E-63  | LRR-RLP   | same      |
| At_RAC1        | TNL       | Rsa | Rsa1.0_00338.1_g00001.1 | 61.927 | 218 | 8    | 222  | 5.10E-75  | TNL       | same      |
| Bol_FocBo1     | TNL       | Rsa | Rsa1.0_03626.1_g00002.1 | 62.613 | 222 | 13   | 233  | 3.38E-78  | TX        | different |
| At_WRR8        | TNL       | Rsa | Rsa1.0_00338.1_g00001.1 | 64.977 | 217 | 19   | 232  | 7.08E-81  | TNL       | same      |
| Bna_Rlm9/4/7   | Other-RLK | Rsa | Rsa1.0_11429.1_g00001.1 | 70.659 | 167 | 386  | 551  | 1.15E-82  | Other-RLK | same      |
| At_RAC1        | TNL       | Rsa | Rsa1.0_03626.1_g00002.1 | 69.658 | 234 | 20   | 249  | 2.04E-91  | TX        | different |

|                |           |     |                         |        |      |     |      |           |           |           |
|----------------|-----------|-----|-------------------------|--------|------|-----|------|-----------|-----------|-----------|
| At_RFO1        | Other-RLK | Rsa | Rsa1.0_11429.1_g00001.1 | 79.762 | 168  | 352 | 518  | 1.10E-93  | Other-RLK | same      |
| At_WRR8        | TNL       | Rsa | Rsa1.0_03626.1_g00002.1 | 63.396 | 265  | 31  | 283  | 3.96E-95  | TX        | different |
| At_WRR4a       | TNL       | Rsa | Rsa1.0_09247.1_g00001.1 | 62.771 | 231  | 5   | 235  | 1.87E-98  | TX        | different |
| Bna_LepR3/Rlm2 | LRR-RLP   | Rsa | Rsa1.0_00016.1_g00027.1 | 70.635 | 252  | 1   | 249  | 8.73E-99  | LRR-RLP   | same      |
| At_WRR4b       | TNL       | Rsa | Rsa1.0_13731.1_g00001.1 | 68.056 | 216  | 7   | 222  | 1.64E-100 | TX        | different |
| At_RLM1a       | TNL       | Rsa | Rsa1.0_09247.1_g00001.1 | 63.983 | 236  | 1   | 236  | 4.49E-103 | TX        | different |
| At_WRR4b       | TNL       | Rsa | Rsa1.0_09247.1_g00001.1 | 68.398 | 231  | 7   | 237  | 1.05E-107 | TX        | different |
| At_RFO1        | Other-RLK | Rsa | Rsa1.0_25697.1_g00001.1 | 64.041 | 292  | 240 | 519  | 4.74E-111 | Other-RLK | same      |
| At_RPP1        | TNL       | Rsa | Rsa1.0_01705.1_g00006.1 | 65.056 | 269  | 94  | 362  | 2.00E-114 | TNL       | same      |
| At_RLM1a       | TNL       | Rsa | Rsa1.0_12238.1_g00001.1 | 61.922 | 281  | 301 | 581  | 2.01E-115 | NBS       | different |
| Bra_cRa/cRb    | TNL       | Rsa | Rsa1.0_01705.1_g00006.1 | 60.294 | 340  | 1   | 339  | 2.51E-118 | TNL       | same      |
| Bra_Crr1a      | TNL       | Rsa | Rsa1.0_01705.1_g00006.1 | 66.904 | 281  | 68  | 347  | 1.34E-119 | TNL       | same      |
| At_RLM1a       | TNL       | Rsa | Rsa1.0_24800.1_g00001.1 | 63.701 | 281  | 301 | 581  | 8.91E-120 | NBS       | different |
| At_PBS1        | Other-RLK | Rsa | Rsa1.0_04364.1_g00001.1 | 62.112 | 322  | 74  | 391  | 5.71E-138 | Other-RLK | same      |
| At_RPS5        | TNL       | Rsa | Rsa1.0_22598.1_g00001.1 | 64.22  | 327  | 308 | 631  | 2.16E-139 | NL        | different |
| At_RPP4        | TNL       | Rsa | Rsa1.0_09437.1_g00001.1 | 60.92  | 435  | 690 | 1113 | 8.91E-146 | TNL       | same      |
| At_ADR1        | NL        | Rsa | Rsa1.0_00127.1_g00035.1 | 65.607 | 346  | 445 | 787  | 5.53E-151 | NL        | same      |
| Bra_cRa/cRb    | TNL       | Rsa | Rsa1.0_00027.1_g00036.1 | 61.456 | 371  | 54  | 423  | 1.04E-151 | TN        | different |
| At_PBS1        | Other-RLK | Rsa | Rsa1.0_00209.1_g00001.1 | 66.881 | 311  | 71  | 381  | 5.97E-157 | Other-RLK | same      |
| Bra_cRa/cRb    | TNL       | Rsa | Rsa1.0_00527.1_g00014.1 | 60.804 | 398  | 75  | 470  | 3.02E-159 | TNL       | same      |
| Bra_Crr1a      | TNL       | Rsa | Rsa1.0_00027.1_g00036.1 | 63.686 | 369  | 60  | 426  | 3.56E-163 | TN        | different |
| At_RPP1        | TNL       | Rsa | Rsa1.0_00027.1_g00036.1 | 62.228 | 368  | 81  | 447  | 5.55E-164 | TN        | different |
| At_RPP2a       | TNL       | Rsa | Rsa1.0_04369.1_g00006.1 | 64.976 | 414  | 1   | 414  | 9.34E-171 | TNL       | same      |
| Bra_Crr1a      | TNL       | Rsa | Rsa1.0_00527.1_g00014.1 | 62.47  | 421  | 50  | 465  | 5.90E-171 | TNL       | same      |
| At_WRR4a       | TNL       | Rsa | Rsa1.0_08371.1_g00001.1 | 62.037 | 432  | 1   | 427  | 5.16E-173 | TN        | different |
| At_RPP1        | TNL       | Rsa | Rsa1.0_00527.1_g00014.1 | 61.033 | 426  | 72  | 493  | 5.03E-173 | TNL       | same      |
| At_RLM3        | TN        | Rsa | Rsa1.0_00524.1_g00004.1 | 60.088 | 456  | 4   | 450  | 1.71E-175 | TNL       | different |
| At_RLM3        | TN        | Rsa | Rsa1.0_09437.1_g00001.1 | 60.486 | 453  | 3   | 445  | 3.28E-177 | TNL       | different |
| At_RPP2a       | TNL       | Rsa | Rsa1.0_00524.1_g00004.1 | 66.912 | 408  | 8   | 414  | 2.94E-177 | TNL       | same      |
| At_BAK1        | LRR-RLK   | Rsa | Rsa1.0_00237.1_g00015.1 | 94.634 | 615  | 1   | 615  | 0         | LRR-RLK   | same      |
| At_BAK1        | LRR-RLK   | Rsa | Rsa1.0_00127.1_g00028.1 | 94.435 | 611  | 5   | 615  | 0         | LRR-RLK   | same      |
| At_BAK1        | LRR-RLK   | Rsa | Rsa1.0_00374.1_g00016.1 | 93.781 | 611  | 5   | 615  | 0         | LRR-RLK   | same      |
| Bol_FocBo1     | TNL       | Rsa | Rsa1.0_00524.1_g00004.1 | 90.171 | 1343 | 1   | 1340 | 0         | TNL       | same      |
| At_RFO1        | Other-RLK | Rsa | Rsa1.0_01251.1_g00006.1 | 85.433 | 762  | 1   | 751  | 0         | Other-RLK | same      |
| At_RPS2        | NL        | Rsa | Rsa1.0_00102.1_g00007.1 | 84.396 | 910  | 1   | 909  | 0         | CNL       | different |
| Bna_Rlm9/4/7   | Other-RLK | Rsa | Rsa1.0_05858.1_g00001.1 | 82.412 | 796  | 1   | 794  | 0         | Other-RLK | same      |
| Bna_Rlm9/4/7   | Other-RLK | Rsa | Rsa1.0_14156.1_g00002.1 | 82.016 | 506  | 23  | 528  | 0         | Other-RLK | same      |
| At_WRR12       | TNL       | Rsa | Rsa1.0_00160.1_g00015.1 | 81.922 | 1051 | 6   | 1049 | 0         | TNL       | same      |
| At_SOBR1       | LRR-RLK   | Rsa | Rsa1.0_08551.1_g00001.1 | 81.123 | 641  | 3   | 640  | 0         | LRR-RLK   | same      |
| At_RLP1        | LRR-RLP   | Rsa | Rsa1.0_00689.1_g00004.1 | 80.855 | 1076 | 1   | 1076 | 0         | LRR-RLP   | same      |
| Bna_LepR3/Rlm2 | LRR-RLP   | Rsa | Rsa1.0_00016.1_g00027.1 | 80.534 | 637  | 317 | 946  | 0         | LRR-RLP   | same      |
| At_RPM1        | NL        | Rsa | Rsa1.0_00030.1_g00049.1 | 80.086 | 934  | 1   | 926  | 0         | NL        | same      |
| At_BAK1        | LRR-RLK   | Rsa | Rsa1.0_03231.1_g00003.1 | 79.373 | 606  | 24  | 615  | 0         | LRR-RLK   | same      |
| At_FLS2        | LRR-RLK   | Rsa | Rsa1.0_00154.1_g00021.1 | 78.455 | 1165 | 1   | 1160 | 0         | LRR-RLK   | same      |
| At_BAK1        | LRR-RLK   | Rsa | Rsa1.0_01255.1_g00009.1 | 78.361 | 610  | 8   | 615  | 0         | LRR-RLK   | same      |
| At_BAK1        | LRR-RLK   | Rsa | Rsa1.0_03481.1_g00005.1 | 78.161 | 609  | 10  | 615  | 0         | LRR-RLK   | same      |
| At_SOBR1       | LRR-RLK   | Rsa | Rsa1.0_04268.1_g00001.1 | 78.14  | 645  | 1   | 641  | 0         | LRR-RLK   | same      |
| At_NGR1a       | RNL       | Rsa | Rsa1.0_01073.1_g00007.1 | 76.801 | 819  | 1   | 809  | 0         | CNL       | different |
| At_RLM1a       | TNL       | Rsa | Rsa1.0_03206.1_g00002.1 | 75.926 | 378  | 11  | 385  | 0         | TNL       | same      |
| At_RPS4        | TNL       | Rsa | Rsa1.0_00091.1_g00018.1 | 75.598 | 1213 | 1   | 1198 | 0         | TNL       | same      |
| At_RFO3        | Other-RLK | Rsa | Rsa1.0_00604.1_g00002.1 | 75.543 | 875  | 2   | 850  | 0         | Other-RLK | same      |
| At_RFO1        | Other-RLK | Rsa | Rsa1.0_01004.1_g00008.1 | 73.969 | 776  | 1   | 751  | 0         | Other-RLK | same      |
| At_RLP32       | LRR-RLP   | Rsa | Rsa1.0_00013.1_g00043.1 | 73.818 | 867  | 1   | 864  | 0         | LRR-RLP   | same      |
| At_RFO3        | Other-RLK | Rsa | Rsa1.0_00628.1_g00003.1 | 73.557 | 866  | 8   | 839  | 0         | Other-RLK | same      |
| At_BAK1        | LRR-RLK   | Rsa | Rsa1.0_00140.1_g00002.1 | 73.52  | 608  | 10  | 615  | 0         | LRR-RLK   | same      |
| At_RPP2b       | TNL       | Rsa | Rsa1.0_02787.1_g00003.1 | 73.519 | 1182 | 16  | 1193 | 0         | TNL       | same      |
| At_RLM1b       | TNL       | Rsa | Rsa1.0_17859.1_g00001.1 | 73.499 | 483  | 1   | 474  | 0         | TN        | different |
| At_RLM1b       | TNL       | Rsa | Rsa1.0_03206.1_g00002.1 | 72.751 | 378  | 11  | 385  | 0         | TNL       | same      |
| Bra_cRa/cRb    | TNL       | Rsa | Rsa1.0_01124.1_g00005.1 | 70.964 | 954  | 70  | 1018 | 0         | Other-NLR | different |
| At_RLM1a       | TNL       | Rsa | Rsa1.0_08371.1_g00001.1 | 69.907 | 432  | 1   | 430  | 0         | TN        | different |
| Bju_WRR1       | CNL       | Rsa | Rsa1.0_01628.1_g00005.1 | 69.197 | 909  | 1   | 900  | 0         | CNL       | same      |
| At_RPS4        | TNL       | Rsa | Rsa1.0_00259.1_g00003.1 | 68.918 | 1229 | 1   | 1217 | 0         | TNL       | same      |
| At_RFO2        | LRR-RLP   | Rsa | Rsa1.0_01463.1_g00005.1 | 68.794 | 705  | 33  | 737  | 0         | LRR-RLK   | different |
| At_RPP8        | CNL       | Rsa | Rsa1.0_00851.1_g00013.1 | 68.736 | 870  | 1   | 863  | 0         | CNL       | same      |
| At_RPP2a       | TNL       | Rsa | Rsa1.0_09437.1_g00001.1 | 68.599 | 414  | 1   | 414  | 0         | TNL       | same      |
| At_NGR1b       | RNL       | Rsa | Rsa1.0_01073.1_g00007.1 | 68.127 | 822  | 5   | 815  | 0         | CNL       | different |
| Bna_Rlm9/4/7   | Other-RLK | Rsa | Rsa1.0_01251.1_g00005.1 | 67.526 | 776  | 24  | 794  | 0         | Other-RLK | same      |
| At_RPP2a       | TNL       | Rsa | Rsa1.0_02787.1_g00004.1 | 67.342 | 888  | 415 | 1299 | 0         | NL        | different |
| At_RPP2b       | TNL       | Rsa | Rsa1.0_01450.1_g00003.1 | 67.303 | 1153 | 1   | 1145 | 0         | Other-NLR | different |
| At_RRS1        | TNL       | Rsa | Rsa1.0_00091.1_g00017.1 | 67.006 | 1179 | 1   | 1169 | 0         | TNL       | same      |
| At_WRR4b       | TNL       | Rsa | Rsa1.0_08371.1_g00001.1 | 66.821 | 431  | 3   | 430  | 0         | TN        | different |
| At_RPP13       | CNL       | Rsa | Rsa1.0_01236.1_g00007.1 | 66.628 | 857  | 1   | 829  | 0         | NL        | different |
| At_RPP13       | CNL       | Rsa | Rsa1.0_04054.1_g00004.1 | 66.55  | 855  | 1   | 832  | 0         | CNL       | same      |
| At_RFO2        | LRR-RLP   | Rsa | Rsa1.0_02133.1_g00001.1 | 66.147 | 706  | 33  | 737  | 0         | LRR-RLP   | same      |
| At_RFO2        | LRR-RLP   | Rsa | Rsa1.0_00396.1_g00016.1 | 65.833 | 720  | 32  | 748  | 0         | LRR-RLK   | different |
| At_RPS5        | TNL       | Rsa | Rsa1.0_15163.1_g00001.1 | 65.801 | 462  | 1   | 462  | 0         | CN        | different |
| At_RLM1b       | TNL       | Rsa | Rsa1.0_08371.1_g00001.1 | 65.509 | 432  | 1   | 430  | 0         | TN        | different |
| At_RLM1a       | TNL       | Rsa | Rsa1.0_17859.1_g00001.1 | 65.424 | 483  | 1   | 474  | 0         | TN        | different |
| At_ADR1        | NL        | Rsa | Rsa1.0_07850.1_g00001.1 | 65.327 | 796  | 3   | 787  | 0         | CNL       | different |
| At_RPS5        | TNL       | Rsa | Rsa1.0_19402.1_g00001.1 | 65.198 | 454  | 138 | 591  | 0         | NL        | different |
| At_RFO1        | Other-RLK | Rsa | Rsa1.0_06912.1_g00003.1 | 64.986 | 714  | 7   | 705  | 0         | Other-RLK | same      |
| At_RLP42       | LRR-RLP   | Rsa | Rsa1.0_00111.1_g00003.1 | 64.892 | 883  | 1   | 876  | 0         | LRR-RLP   | same      |
| At_RLP32       | LRR-RLP   | Rsa | Rsa1.0_00016.1_g00027.1 | 64.815 | 648  | 228 | 864  | 0         | LRR-RLP   | same      |
| At_RLP32       | LRR-RLP   | Rsa | Rsa1.0_01434.1_g00013.1 | 64.683 | 756  | 114 | 854  | 0         | LRR-RLP   | same      |
| At_RLM1b       | TNL       | Rsa | Rsa1.0_04941.1_g00001.1 | 64.599 | 935  | 1   | 925  | 0         | Other-NLR | different |
| At_RLP23       | LRR-RLP   | Rsa | Rsa1.0_00111.1_g00003.1 | 64.541 | 894  | 1   | 890  | 0         | LRR-RLP   | same      |

|                |           |     |                         |        |      |     |      |           |           |           |
|----------------|-----------|-----|-------------------------|--------|------|-----|------|-----------|-----------|-----------|
| At_RRS1        | TNL       | Rsa | Rsa1.0_03896.1_g00002.1 | 64.092 | 1178 | 1   | 1168 | 0         | TNL       | same      |
| At_RPS5        | TNL       | Rsa | Rsa1.0_01327.1_g00007.1 | 63.729 | 885  | 1   | 880  | 0         | CNL       | different |
| At_RLM1a       | TNL       | Rsa | Rsa1.0_07116.1_g00001.1 | 63.592 | 618  | 10  | 621  | 0         | TNL       | same      |
| Bra_cRa/cRb    | TNL       | Rsa | Rsa1.0_01124.1_g00006.1 | 63.591 | 1398 | 1   | 1322 | 0         | TNL       | same      |
| At_WRR9        | NL        | Rsa | Rsa1.0_08371.1_g00001.1 | 63.426 | 432  | 5   | 434  | 0         | TN        | different |
| At_RLP32       | LRR-RLP   | Rsa | Rsa1.0_02149.1_g00003.1 | 63.221 | 745  | 117 | 852  | 0         | LRR-RLP   | same      |
| At_RLP23       | LRR-RLP   | Rsa | Rsa1.0_05999.1_g00003.1 | 63.21  | 704  | 175 | 876  | 0         | LRR-RLP   | same      |
| At_RPP5        | TNL       | Rsa | Rsa1.0_04369.1_g00006.1 | 63     | 700  | 3   | 671  | 0         | TNL       | same      |
| At_RLM1a       | TNL       | Rsa | Rsa1.0_04941.1_g00001.1 | 62.514 | 923  | 3   | 917  | 0         | Other-NLR | different |
| At_RLP42       | LRR-RLP   | Rsa | Rsa1.0_05999.1_g00003.1 | 62.428 | 692  | 182 | 870  | 0         | LRR-RLP   | same      |
| At_RLP23       | LRR-RLP   | Rsa | Rsa1.0_01458.1_g00003.1 | 62.361 | 720  | 175 | 889  | 0         | LRR-RLP   | same      |
| At_RLP23       | LRR-RLP   | Rsa | Rsa1.0_05999.1_g00001.1 | 62.343 | 717  | 175 | 889  | 0         | LRR-RLP   | same      |
| At_WRR9        | NL        | Rsa | Rsa1.0_17859.1_g00001.1 | 62.268 | 485  | 5   | 479  | 0         | TN        | different |
| Bna_LepR3/Rlm2 | LRR-RLP   | Rsa | Rsa1.0_02149.1_g00003.1 | 62.199 | 955  | 1   | 944  | 0         | LRR-RLP   | same      |
| At_WRR4b       | TNL       | Rsa | Rsa1.0_17859.1_g00001.1 | 62.112 | 483  | 1   | 474  | 0         | TN        | different |
| At_RLM1b       | TNL       | Rsa | Rsa1.0_00662.1_g00013.1 | 61.857 | 991  | 1   | 975  | 0         | TNL       | same      |
| Bra_Crr1a      | TNL       | Rsa | Rsa1.0_13327.1_g00001.1 | 61.653 | 472  | 220 | 687  | 0         | NL        | different |
| At_RLP42       | LRR-RLP   | Rsa | Rsa1.0_05999.1_g00001.1 | 61.626 | 701  | 182 | 880  | 0         | LRR-RLP   | same      |
| At_RLP42       | LRR-RLP   | Rsa | Rsa1.0_01458.1_g00003.1 | 61.581 | 721  | 182 | 889  | 0         | LRR-RLP   | same      |
| At_RLP23       | LRR-RLP   | Rsa | Rsa1.0_01339.1_g00008.1 | 61.574 | 864  | 17  | 877  | 0         | LRR-RLP   | same      |
| At_RPP39       | CNL       | Rsa | Rsa1.0_00039.1_g00041.1 | 61.521 | 881  | 1   | 870  | 0         | CNL       | same      |
| Bju_WRR1       | CNL       | Rsa | Rsa1.0_00851.1_g00013.1 | 61.495 | 883  | 1   | 860  | 0         | CNL       | same      |
| At_RPS5        | TNL       | Rsa | Rsa1.0_04072.1_g00002.1 | 61.453 | 895  | 1   | 883  | 0         | NL        | different |
| At_RLM1b       | TNL       | Rsa | Rsa1.0_04941.1_g00004.1 | 61.442 | 1040 | 1   | 1014 | 0         | TNL       | same      |
| Bol_FocBo1     | TNL       | Rsa | Rsa1.0_09437.1_g00001.1 | 61.287 | 979  | 5   | 981  | 0         | TNL       | same      |
| At_RPP8        | CNL       | Rsa | Rsa1.0_01628.1_g00005.1 | 61.05  | 914  | 1   | 903  | 0         | CNL       | same      |
| At_RLP42       | LRR-RLP   | Rsa | Rsa1.0_04036.1_g00004.1 | 60.978 | 879  | 1   | 876  | 0         | LRR-RLP   | same      |
| At_RLM1b       | TNL       | Rsa | Rsa1.0_10052.1_g00001.1 | 60.955 | 963  | 1   | 949  | 0         | TNL       | same      |
| Bra_Crr1a      | TNL       | Rsa | Rsa1.0_03069.1_g00004.1 | 60.928 | 1272 | 52  | 1214 | 0         | TNL       | same      |
| At_RPS5        | TNL       | Rsa | Rsa1.0_00018.1_g00052.1 | 60.879 | 887  | 1   | 881  | 0         | CNL       | different |
| At_ADR1        | NL        | Rsa | Rsa1.0_00123.1_g00044.1 | 60.811 | 814  | 6   | 787  | 0         | NL        | same      |
| At_RLP42       | LRR-RLP   | Rsa | Rsa1.0_01339.1_g00008.1 | 60.748 | 856  | 19  | 871  | 0         | LRR-RLP   | same      |
| Bol_FocBo1     | TNL       | Rsa | Rsa1.0_02434.1_g00005.1 | 60.68  | 618  | 7   | 618  | 0         | Other-NLR | different |
| Bra_Crr1a      | TNL       | Rsa | Rsa1.0_01124.1_g00005.1 | 60.652 | 1258 | 1   | 1224 | 0         | Other-NLR | different |
| At_RPS5        | TNL       | Rsa | Rsa1.0_01079.1_g00004.1 | 60.595 | 840  | 43  | 880  | 0         | NL        | different |
| At_RLP32       | LRR-RLP   | Rsa | Rsa1.0_00179.1_g00063.1 | 60.552 | 905  | 1   | 866  | 0         | LRR-RLP   | same      |
| At_RLM1b       | TNL       | Rsa | Rsa1.0_04344.1_g00002.1 | 60.537 | 1006 | 1   | 993  | 0         | TNL       | same      |
| At_RLM1b       | TNL       | Rsa | Rsa1.0_07116.1_g00001.1 | 60.514 | 623  | 10  | 626  | 0         | TNL       | same      |
| At_RPP2a       | TNL       | Rsa | Rsa1.0_01450.1_g00006.1 | 60.394 | 813  | 494 | 1299 | 0         | TNL       | same      |
| At_RLP23       | LRR-RLP   | Rsa | Rsa1.0_04036.1_g00004.1 | 60.223 | 895  | 1   | 890  | 0         | LRR-RLP   | same      |
| At_WRR4b       | TNL       | Rsa | Rsa1.0_07116.1_g00001.1 | 60.161 | 620  | 11  | 623  | 0         | TNL       | same      |
| At_ADR1        | NL        | Sir | SI_scaffold249_14       | 69.554 | 808  | 3   | 787  | 0         | CNL       | different |
| At_ADR1        | NL        | Sir | SI_C228743_3            | 61.481 | 810  | 6   | 787  | 0         | NL        | same      |
| At_ADR1        | NL        | Sir | SI_scaffold669_157      | 60.292 | 821  | 3   | 787  | 0         | NL        | same      |
| At_BAK1        | LRR-RLK   | Sir | SI_scaffold669_147      | 91.473 | 645  | 1   | 615  | 0         | LRR-RLK   | same      |
| At_BAK1        | LRR-RLK   | Sir | SI_scaffold362_6        | 79.579 | 617  | 1   | 615  | 0         | LRR-RLK   | same      |
| At_BAK1        | LRR-RLK   | Sir | SI_scaffold1058_17      | 77.541 | 610  | 24  | 615  | 0         | LRR-RLK   | same      |
| At_BAK1        | LRR-RLK   | Sir | SI_scaffold161_3        | 77.377 | 610  | 20  | 615  | 0         | LRR-RLK   | same      |
| At_BAK1        | LRR-RLK   | Sir | SI_C231345_8            | 77.377 | 610  | 20  | 615  | 0         | LRR-RLK   | same      |
| At_BAK1        | LRR-RLK   | Sir | SI_C230793_3            | 77.377 | 610  | 20  | 615  | 0         | LRR-RLK   | same      |
| At_BAK1        | LRR-RLK   | Sir | SI_C217599_3            | 74.281 | 591  | 30  | 615  | 0         | LRR-RLK   | same      |
| At_FLS2        | LRR-RLK   | Sir | SI_scaffold1724_31      | 81.787 | 1164 | 1   | 1160 | 0         | LRR-RLK   | same      |
| At_FLS2        | LRR-RLK   | Sir | SI_scaffold1724_32      | 70.3   | 1165 | 23  | 1159 | 0         | LRR-RLK   | same      |
| At_NGR1a       | RNL       | Sir | SI_scaffold2426_217     | 77.178 | 815  | 1   | 809  | 0         | NL        | different |
| At_NGR1a       | RNL       | Sir | SI_scaffold2426_218     | 66.141 | 824  | 5   | 809  | 0         | CNL       | different |
| At_NGR1a       | RNL       | Sir | SI_scaffold2426_219     | 65.617 | 413  | 404 | 809  | 0         | NL        | different |
| At_NGR1b       | RNL       | Sir | SI_scaffold2426_219     | 61.779 | 416  | 406 | 815  | 1.32E-168 | NL        | different |
| At_NGR1b       | RNL       | Sir | SI_scaffold2426_217     | 67.476 | 824  | 3   | 815  | 0         | NL        | different |
| At_NGR1b       | RNL       | Sir | SI_scaffold2426_218     | 62.606 | 829  | 9   | 815  | 0         | CNL       | different |
| At_PBS1        | Other-RLK | Sir | SI_scaffold123_149      | 74.528 | 318  | 69  | 370  | 2.76E-168 | Other-RLK | same      |
| At_RAC1        | TNL       | Sir | SI_scaffold1724_46      | 64.977 | 217  | 2   | 215  | 5.32E-81  | TNL       | same      |
| At_RAC1        | TNL       | Sir | SI_scaffold877_4        | 61.328 | 256  | 1   | 253  | 1.44E-91  | TN        | different |
| At_RAC1        | TNL       | Sir | SI_scaffold862_17       | 60.392 | 919  | 12  | 920  | 0         | TNL       | same      |
| At_RFO1        | Other-RLK | Sir | SI_scaffold2049_127     | 87.957 | 739  | 18  | 751  | 0         | Other-RLK | same      |
| At_RFO1        | Other-RLK | Sir | SI_scaffold1491_128     | 63.649 | 729  | 32  | 742  | 0         | Other-RLK | same      |
| At_RFO1        | Other-RLK | Sir | SI_scaffold1491_129     | 61.235 | 761  | 10  | 745  | 0         | Other-RLK | same      |
| At_RFO1        | Other-RLK | Sir | SI_scaffold1491_127     | 60.166 | 723  | 19  | 725  | 0         | Other-RLK | same      |
| At_RFO2        | LRR-RLP   | Sir | SI_scaffold242_77       | 72.073 | 709  | 29  | 737  | 0         | LRR-RLK   | different |
| At_RFO2        | LRR-RLP   | Sir | SI_scaffold227_27       | 69.429 | 736  | 6   | 740  | 0         | LRR-RLP   | same      |
| At_RFO3        | Other-RLK | Sir | SI_scaffold744_139      | 76.157 | 864  | 1   | 850  | 0         | Other-RLK | same      |
| At_RFO3        | Other-RLK | Sir | SI_scaffold741_12       | 68.167 | 933  | 1   | 850  | 0         | Other-RLK | same      |
| At_RLM1a       | TNL       | Sir | SI_scaffold436_1        | 62.987 | 154  | 5   | 158  | 5.68E-58  | TX        | different |
| At_RLM1a       | TNL       | Sir | SI_scaffold325_22       | 70.064 | 157  | 1   | 157  | 5.89E-60  | TNL       | same      |
| At_RLM1a       | TNL       | Sir | SI_scaffold1338_12      | 66.184 | 207  | 13  | 219  | 1.01E-83  | TNL       | same      |
| At_RLM1a       | TNL       | Sir | SI_scaffold2804_1       | 74.879 | 207  | 11  | 217  | 1.76E-95  | TNL       | same      |
| At_RLM1a       | TNL       | Sir | SI_scaffold1847_1       | 64.977 | 217  | 3   | 219  | 1.10E-95  | TX        | different |
| At_RLM1a       | TNL       | Sir | SI_scaffold1174_8       | 65.723 | 318  | 38  | 355  | 1.41E-142 | TN        | different |
| At_RLM1a       | TNL       | Sir | SI_scaffold146_3        | 72.022 | 361  | 160 | 519  | 1.25E-172 | NL        | different |
| At_RLM1a       | TNL       | Sir | SI_scaffold146_21       | 68.727 | 534  | 8   | 539  | 0         | TNL       | same      |
| At_RLM1a       | TNL       | Sir | SI_scaffold146_4        | 62.901 | 903  | 3   | 896  | 0         | TNL       | same      |
| At_RLM1a       | TNL       | Sir | SI_scaffold325_13       | 60.768 | 989  | 10  | 982  | 0         | Other-NLR | different |
| At_RLM1a       | TNL       | Sir | SI_scaffold325_17       | 60.512 | 937  | 10  | 944  | 0         | TNL       | same      |
| At_RLM1a       | TNL       | Sir | SI_scaffold325_14       | 60.02  | 993  | 1   | 986  | 0         | TNL       | same      |
| At_RLM1b       | TNL       | Sir | SI_scaffold1338_12      | 61.836 | 207  | 13  | 219  | 6.28E-75  | TNL       | same      |
| At_RLM1b       | TNL       | Sir | SI_scaffold2804_1       | 61.25  | 240  | 14  | 253  | 2.76E-84  | TNL       | same      |
| At_RLM1b       | TNL       | Sir | SI_scaffold1847_1       | 62.673 | 217  | 4   | 219  | 4.49E-88  | TX        | different |

|          |         |     |                     |        |      |     |      |           |           |           |
|----------|---------|-----|---------------------|--------|------|-----|------|-----------|-----------|-----------|
| At_RLM1b | TNL     | Sir | SI_scaffold1882_1   | 83.784 | 185  | 1   | 182  | 4.04E-102 | TX        | different |
| At_RLM1b | TNL     | Sir | SI_scaffold1174_8   | 67.619 | 315  | 41  | 355  | 4.02E-145 | TN        | different |
| At_RLM1b | TNL     | Sir | SI_scaffold146_3    | 67.391 | 368  | 160 | 526  | 3.18E-160 | NL        | different |
| At_RLM1b | TNL     | Sir | SI_scaffold146_21   | 68.468 | 555  | 8   | 556  | 0         | TNL       | same      |
| At_RLM1b | TNL     | Sir | SI_scaffold325_14   | 66.269 | 1005 | 1   | 994  | 0         | TNL       | same      |
| At_RLM1b | TNL     | Sir | SI_scaffold325_15   | 65.823 | 1027 | 1   | 1009 | 0         | TNL       | same      |
| At_RLM1b | TNL     | Sir | SI_scaffold325_14   | 63.718 | 1006 | 11  | 998  | 0         | TNL       | same      |
| At_RLM1b | TNL     | Sir | SI_scaffold325_12   | 62.762 | 1050 | 1   | 1012 | 0         | TNL       | same      |
| At_RLM1b | TNL     | Sir | SI_scaffold325_13   | 62.735 | 1009 | 10  | 997  | 0         | Other-NLR | different |
| At_RLM1b | TNL     | Sir | SI_scaffold146_4    | 61.531 | 1032 | 3   | 1014 | 0         | TNL       | same      |
| At_RLP1  | LRR-RLP | Sir | SI_scaffold2746_207 | 74.299 | 1070 | 24  | 1067 | 0         | LRR-RLP   | same      |
| At_RLP1  | LRR-RLP | Sir | SI_scaffold2881_1   | 64.49  | 490  | 567 | 1055 | 0         | LRR-RLP   | same      |
| At_RLP23 | LRR-RLP | Sir | SI_scaffold651_19   | 68.806 | 888  | 1   | 884  | 0         | LRR-RLP   | same      |
| At_RLP23 | LRR-RLP | Sir | SI_scaffold1453_8   | 65.303 | 611  | 175 | 780  | 0         | LRR-RLP   | same      |
| At_RLP23 | LRR-RLP | Sir | SI_scaffold718_53   | 63.18  | 717  | 175 | 889  | 0         | LRR-RLP   | same      |
| At_RLP23 | LRR-RLP | Sir | SI_scaffold154_84   | 62.535 | 718  | 175 | 890  | 0         | LRR-RLP   | same      |
| At_RLP23 | LRR-RLP | Sir | SI_scaffold1453_7   | 61.389 | 720  | 175 | 889  | 0         | LRR-RLP   | same      |
| At_RLP23 | LRR-RLP | Sir | SI_scaffold1417_16  | 60.728 | 522  | 1   | 520  | 0         | LRR-RLP   | same      |
| At_RLP30 | LRR-RLP | Sir | SI_scaffold857_5    | 61.161 | 775  | 17  | 786  | 0         | LRR-RLP   | same      |
| At_RLP30 | LRR-RLP | Sir | SI_scaffold930_20   | 60.696 | 776  | 1   | 769  | 0         | LRR-RLP   | same      |
| At_RLP30 | LRR-RLP | Sir | SI_scaffold1097_6   | 60.181 | 663  | 100 | 760  | 0         | LRR-RLP   | same      |
| At_RLP32 | LRR-RLP | Sir | SI_scaffold2443_28  | 66.517 | 669  | 187 | 853  | 0         | LRR-RLP   | same      |
| At_RLP32 | LRR-RLP | Sir | SI_C228887_1        | 66.517 | 669  | 187 | 853  | 0         | LRR-RLP   | same      |
| At_RLP32 | LRR-RLP | Sir | SI_scaffold1201_3   | 65.984 | 635  | 218 | 852  | 0         | LRR-RLP   | same      |
| At_RLP32 | LRR-RLP | Sir | SI_C226829_1        | 65.639 | 876  | 1   | 850  | 0         | LRR-RLP   | same      |
| At_RLP32 | LRR-RLP | Sir | SI_scaffold712_15   | 64.486 | 749  | 114 | 854  | 0         | LRR-RLP   | same      |
| At_RLP32 | LRR-RLP | Sir | SI_scaffold1201_18  | 64.347 | 819  | 69  | 846  | 0         | LRR-RLP   | same      |
| At_RLP32 | LRR-RLP | Sir | SI_scaffold651_14   | 63.594 | 857  | 9   | 853  | 0         | LRR-RLP   | same      |
| At_RLP32 | LRR-RLP | Sir | SI_scaffold429_15   | 63.587 | 736  | 117 | 850  | 0         | LRR-RLP   | same      |
| At_RLP32 | LRR-RLP | Sir | SI_scaffold2390_5   | 62.251 | 853  | 1   | 844  | 0         | LRR-RLP   | same      |
| At_RLP32 | LRR-RLP | Sir | SI_scaffold651_24   | 62.034 | 885  | 28  | 854  | 0         | LRR-RLP   | same      |
| At_RLP32 | LRR-RLP | Sir | SI_C228331_1        | 62.034 | 885  | 28  | 854  | 0         | LRR-RLP   | same      |
| At_RLP32 | LRR-RLP | Sir | SI_C225375_3        | 62.034 | 885  | 28  | 854  | 0         | LRR-RLP   | same      |
| At_RLP32 | LRR-RLP | Sir | SI_scaffold651_19   | 61.893 | 824  | 36  | 853  | 0         | LRR-RLP   | same      |
| At_RLP32 | LRR-RLP | Sir | SI_scaffold2443_26  | 61.705 | 833  | 69  | 831  | 0         | LRR-RLK   | different |
| At_RLP32 | LRR-RLP | Sir | SI_scaffold651_20   | 60.343 | 875  | 14  | 841  | 0         | LRR-RLP   | same      |
| At_RLP42 | LRR-RLP | Sir | SI_scaffold1417_16  | 61.377 | 523  | 1   | 520  | 1.25E-174 | LRR-RLP   | same      |
| At_RLP42 | LRR-RLP | Sir | SI_scaffold651_19   | 68.601 | 879  | 1   | 876  | 0         | LRR-RLP   | same      |
| At_RLP42 | LRR-RLP | Sir | SI_scaffold1453_8   | 63.562 | 612  | 175 | 780  | 0         | LRR-RLP   | same      |
| At_RLP42 | LRR-RLP | Sir | SI_scaffold718_53   | 62     | 700  | 182 | 876  | 0         | LRR-RLP   | same      |
| At_RLP42 | LRR-RLP | Sir | SI_scaffold154_84   | 61.396 | 702  | 183 | 880  | 0         | LRR-RLP   | same      |
| At_RPP1  | TNL     | Sir | SI_scaffold1847_1   | 60.577 | 208  | 97  | 304  | 4.32E-85  | TX        | different |
| At_RPP1  | TNL     | Sir | SI_scaffold158_1    | 60.42  | 619  | 95  | 711  | 0         | TNL       | same      |
| At_RPP13 | CNL     | Sir | SI_scaffold592_1    | 65.285 | 386  | 1   | 384  | 2.38E-145 | NBS       | different |
| At_RPP2a | TNL     | Sir | SI_C227795_1        | 62.319 | 414  | 3   | 414  | 4.16E-162 | TNL       | same      |
| At_RPP2a | TNL     | Sir | SI_scaffold842_25   | 62.155 | 399  | 11  | 409  | 3.61E-166 | TN        | different |
| At_RPP2a | TNL     | Sir | SI_scaffold842_29   | 68.719 | 406  | 10  | 414  | 1.36E-171 | TNL       | same      |
| At_RPP2a | TNL     | Sir | SI_scaffold930_156  | 71.742 | 821  | 480 | 1299 | 0         | NL        | different |
| At_RPP2b | TNL     | Sir | SI_scaffold930_157  | 71.263 | 1211 | 3   | 1183 | 0         | TNL       | same      |
| At_RPP39 | CNL     | Sir | SI_scaffold216_7    | 65.32  | 297  | 55  | 351  | 6.09E-135 | NBS       | different |
| At_RPP39 | CNL     | Sir | SI_C205065_2        | 69.307 | 303  | 247 | 549  | 8.09E-146 | NBS       | different |
| At_RPP39 | CNL     | Sir | SI_scaffold2334_4   | 64.463 | 363  | 1   | 363  | 4.91E-147 | CN        | different |
| At_RPP39 | CNL     | Sir | SI_C214951_1        | 67.227 | 357  | 248 | 599  | 3.69E-158 | CNL       | same      |
| At_RPP39 | CNL     | Sir | SI_C217313_1        | 64.439 | 883  | 1   | 873  | 0         | CNL       | same      |
| At_RPP39 | CNL     | Sir | SI_C196787_1        | 63.093 | 569  | 299 | 860  | 0         | NL        | different |
| At_RPP39 | CNL     | Sir | SI_scaffold2334_3   | 62.514 | 875  | 25  | 876  | 0         | CNL       | same      |
| At_RPP39 | CNL     | Sir | SI_scaffold1010_13  | 60.105 | 569  | 314 | 870  | 0         | NL        | different |
| At_RPP8  | CNL     | Sir | SI_scaffold461_17   | 68.196 | 327  | 3   | 329  | 1.52E-150 | CNL       | same      |
| At_RPP8  | CNL     | Sir | SI_scaffold1384_210 | 68.894 | 913  | 1   | 908  | 0         | CNL       | same      |
| At_RPP8  | CNL     | Sir | SI_scaffold162_11   | 66.156 | 913  | 3   | 908  | 0         | CNL       | same      |
| At_RPS2  | NL      | Sir | SI_scaffold2159_199 | 84.945 | 910  | 1   | 909  | 0         | CNL       | different |
| At_RPS5  | TNL     | Sir | SI_scaffold249_155  | 66.061 | 881  | 1   | 880  | 0         | CNL       | different |
| At_RPS5  | TNL     | Sir | SI_scaffold249_162  | 61.628 | 774  | 119 | 880  | 0         | CNL       | different |
| At_RPS5  | TNL     | Sir | SI_scaffold249_153  | 60.582 | 893  | 1   | 880  | 0         | CNL       | different |
| At_RPS5  | TNL     | Sir | SI_scaffold1240_19  | 60.043 | 931  | 1   | 881  | 0         | CNL       | different |
| At_SOBI1 | LRR-RLK | Sir | SI_scaffold3078_7   | 85.537 | 643  | 1   | 641  | 0         | LRR-RLK   | same      |
| At_WRR12 | TNL     | Sir | SI_scaffold759_4    | 61.645 | 1009 | 1   | 989  | 0         | TNL       | same      |
| At_WRR4a | TNL     | Sir | SI_scaffold325_22   | 69.079 | 152  | 1   | 152  | 9.15E-58  | TNL       | same      |
| At_WRR4a | TNL     | Sir | SI_scaffold436_1    | 66.242 | 157  | 1   | 157  | 1.43E-60  | TX        | different |
| At_WRR4a | TNL     | Sir | SI_scaffold1338_12  | 63.285 | 207  | 12  | 218  | 1.16E-77  | TNL       | same      |
| At_WRR4a | TNL     | Sir | SI_scaffold2804_1   | 62.185 | 238  | 8   | 245  | 6.76E-87  | TNL       | same      |
| At_WRR4a | TNL     | Sir | SI_scaffold1847_1   | 63.761 | 218  | 1   | 218  | 7.82E-92  | TX        | different |
| At_WRR4a | TNL     | Sir | SI_scaffold1174_8   | 61.587 | 315  | 40  | 353  | 6.22E-125 | TN        | different |
| At_WRR4a | TNL     | Sir | SI_scaffold146_21   | 60.155 | 517  | 7   | 521  | 0         | TNL       | same      |
| At_WRR4b | TNL     | Sir | SI_scaffold325_22   | 74.667 | 150  | 12  | 161  | 1.00E-61  | TNL       | same      |
| At_WRR4b | TNL     | Sir | SI_scaffold436_1    | 67.532 | 154  | 6   | 159  | 5.30E-62  | TX        | different |
| At_WRR4b | TNL     | Sir | SI_scaffold1882_1   | 72.432 | 185  | 1   | 183  | 2.98E-88  | TX        | different |
| At_WRR4b | TNL     | Sir | SI_scaffold1847_1   | 64.545 | 220  | 1   | 220  | 1.33E-94  | TX        | different |
| At_WRR4b | TNL     | Sir | SI_scaffold2804_1   | 74.396 | 207  | 12  | 218  | 2.31E-95  | TNL       | same      |
| At_WRR4b | TNL     | Sir | SI_scaffold1174_8   | 66.349 | 315  | 42  | 355  | 4.93E-140 | TN        | different |
| At_WRR4b | TNL     | Sir | SI_scaffold146_3    | 62.295 | 366  | 161 | 524  | 6.58E-144 | NL        | different |
| At_WRR4b | TNL     | Sir | SI_scaffold146_21   | 67.057 | 513  | 11  | 522  | 0         | TNL       | same      |
| At_WRR8  | TNL     | Sir | SI_scaffold1724_46  | 61.066 | 244  | 13  | 253  | 4.25E-85  | TNL       | same      |
| At_WRR8  | TNL     | Sir | SI_scaffold862_17   | 61.838 | 925  | 5   | 918  | 0         | TNL       | same      |
| At_WRR9  | NL      | Sir | SI_scaffold1882_1   | 67.027 | 185  | 5   | 186  | 1.05E-77  | TX        | different |
| At_WRR9  | NL      | Sir | SI_scaffold146_3    | 62.842 | 366  | 164 | 527  | 3.69E-140 | NL        | same      |

|                |           |     |                     |        |      |     |      |           |           |           |
|----------------|-----------|-----|---------------------|--------|------|-----|------|-----------|-----------|-----------|
| At_WRR9        | NL        | Sir | SI_scaffold325_12   | 61.039 | 1001 | 5   | 985  | 0         | TNL       | different |
| Bju_WRR1       | CNL       | Sir | SI_scaffold461_17   | 65.443 | 327  | 3   | 324  | 2.74E-139 | CNL       | same      |
| Bju_WRR1       | CNL       | Sir | SI_scaffold162_11   | 61.184 | 912  | 3   | 900  | 0         | CNL       | same      |
| Bju_WRR1       | CNL       | Sir | SI_scaffold1384_210 | 60.283 | 919  | 1   | 900  | 0         | CNL       | same      |
| Bna_LepR3/Rlm2 | LRR-RLP   | Sir | SI_scaffold429_15   | 73.053 | 950  | 1   | 945  | 0         | LRR-RLP   | same      |
| Bna_LepR3/Rlm2 | LRR-RLP   | Sir | SI_C226829_1        | 62.1   | 781  | 176 | 950  | 0         | LRR-RLP   | same      |
| Bna_LepR3/Rlm2 | LRR-RLP   | Sir | SI_scaffold651_14   | 62.087 | 757  | 187 | 938  | 0         | LRR-RLP   | same      |
| Bna_LepR3/Rlm2 | LRR-RLP   | Sir | SI_scaffold2443_28  | 61.869 | 674  | 276 | 947  | 0         | LRR-RLP   | same      |
| Bna_LepR3/Rlm2 | LRR-RLP   | Sir | SI_C228887_1        | 61.869 | 674  | 276 | 947  | 0         | LRR-RLP   | same      |
| Bna_LepR3/Rlm2 | LRR-RLP   | Sir | SI_scaffold1201_3   | 61.61  | 646  | 302 | 947  | 0         | LRR-RLP   | same      |
| Bna_MPK9       | Other-RLK | Sir | SI_C212699_1        | 81.081 | 407  | 100 | 506  | 0         | Other-RLK | same      |
| Bna_Rlm9/4/7   | Other-RLK | Sir | SI_scaffold2049_126 | 75.513 | 829  | 1   | 794  | 0         | Other-RLK | same      |
| Bna_Rlm9/4/7   | Other-RLK | Sir | SI_scaffold1597_89  | 63.317 | 796  | 17  | 793  | 0         | Other-RLK | same      |
| Bna_Rlm9/4/7   | Other-RLK | Sir | SI_scaffold397_8    | 62.893 | 795  | 23  | 794  | 0         | Other-RLK | same      |
| Bna_Rlm9/4/7   | Other-RLK | Sir | SI_scaffold1491_127 | 60.852 | 728  | 23  | 735  | 0         | Other-RLK | same      |
| Bol_FocBo1     | TNL       | Sir | SI_scaffold842_29   | 73.875 | 1378 | 5   | 1355 | 0         | TNL       | same      |
| Bol_FocBo1     | TNL       | Sir | SI_scaffold842_25   | 70     | 400  | 10  | 409  | 0         | TN        | different |
| Bol_FocBo1     | TNL       | Sir | SI_C227795_1        | 64.309 | 905  | 5   | 907  | 0         | TNL       | same      |
| Bra_cRa/cRb    | TNL       | Sir | SI_scaffold627_15   | 62.092 | 153  | 930 | 1082 | 1.18E-45  | TNL       | same      |
| Bra_Crr1a      | TNL       | Sir | SI_scaffold627_18   | 63.964 | 222  | 676 | 894  | 1.92E-66  | TNL       | same      |
| Bra_Crr1a      | TNL       | Sir | SI_scaffold627_18   | 60.821 | 268  | 676 | 939  | 6.61E-76  | TNL       | same      |
| Bra_Crr1a      | TNL       | Sir | SI_scaffold101_105  | 66.379 | 232  | 12  | 213  | 2.89E-88  | TX        | different |
| Bra_Crr1a      | TNL       | Sir | SI_scaffold553_4    | 61.011 | 277  | 318 | 594  | 2.46E-101 | NL        | different |
| At_ADR1        | NL        | Sal | KAF8115254.1        | 61.501 | 813  | 6   | 787  | 0         | NL        | same      |
| At_BAK1        | LRR-RLK   | Sal | KAF8098353.1        | 95.13  | 616  | 1   | 615  | 0         | LRR-RLK   | same      |
| At_BAK1        | LRR-RLK   | Sal | KAF8097069.1        | 94.805 | 616  | 1   | 615  | 0         | LRR-RLK   | same      |
| At_BAK1        | LRR-RLK   | Sal | KAF8050199.1        | 93.617 | 611  | 5   | 615  | 0         | LRR-RLK   | same      |
| At_BAK1        | LRR-RLK   | Sal | KAF8112805.1        | 80.395 | 607  | 10  | 615  | 0         | LRR-RLK   | same      |
| At_BAK1        | LRR-RLK   | Sal | KAF8091387.1        | 79.373 | 606  | 24  | 615  | 0         | LRR-RLK   | same      |
| At_BAK1        | LRR-RLK   | Sal | KAF8118948.1        | 78.082 | 584  | 35  | 615  | 0         | LRR-RLK   | same      |
| At_BAK1        | LRR-RLK   | Sal | KAF8090271.1        | 78.029 | 619  | 11  | 615  | 0         | LRR-RLK   | same      |
| At_BAK1        | LRR-RLK   | Sal | KAF8049920.1        | 72.131 | 549  | 68  | 615  | 0         | LRR-RLK   | same      |
| At_BAK1        | LRR-RLK   | Sal | KAF8049426.1        | 64.929 | 633  | 22  | 615  | 0         | LRR-RLK   | same      |
| At_FLS2        | LRR-RLK   | Sal | KAF8117201.1        | 77.959 | 980  | 196 | 1170 | 0         | LRR-RLK   | same      |
| At_NGR1a       | RNL       | Sal | KAF8101461.1        | 80.346 | 809  | 11  | 809  | 0         | CNL       | different |
| At_NGR1a       | RNL       | Sal | KAF8112165.1        | 70.579 | 656  | 1   | 636  | 0         | CNL       | different |
| At_NGR1a       | RNL       | Sal | KAF8085476.1        | 62.759 | 819  | 5   | 809  | 0         | NL        | different |
| At_NGR1b       | RNL       | Sal | KAF8101461.1        | 68.987 | 819  | 11  | 815  | 0         | CNL       | different |
| At_NGR1b       | RNL       | Sal | KAF8085476.1        | 61.642 | 816  | 11  | 815  | 0         | NL        | different |
| At_NGR1b       | RNL       | Sal | KAF8112165.1        | 61.002 | 659  | 5   | 642  | 0         | CNL       | different |
| At_PBS1        | Other-RLK | Sal | KAF8047997.1        | 66.149 | 322  | 71  | 392  | 2.44E-158 | Other-RLK | same      |
| At_PBS1        | Other-RLK | Sal | KAF8047998.1        | 60.541 | 370  | 28  | 392  | 1.54E-158 | Other-RLK | same      |
| At_PBS1        | Other-RLK | Sal | KAF8116034.1        | 66.46  | 322  | 71  | 392  | 7.51E-159 | Other-RLK | same      |
| At_RAC1        | TNL       | Sal | KAF8118565.1        | 67.066 | 167  | 9   | 172  | 1.03E-67  | TX        | different |
| At_RAC1        | TNL       | Sal | KAF8044651.1        | 72.647 | 340  | 9   | 345  | 8.84E-170 | TN        | different |
| At_RFO1        | Other-RLK | Sal | KAF8091446.1        | 62.441 | 213  | 542 | 750  | 2.48E-81  | Other-RLK | same      |
| At_RFO1        | Other-RLK | Sal | KAF8103426.1        | 86.262 | 757  | 1   | 751  | 0         | Other-RLK | same      |
| At_RFO1        | Other-RLK | Sal | KAF8083637.1        | 79.921 | 762  | 1   | 751  | 0         | Other-RLK | same      |
| At_RFO1        | Other-RLK | Sal | KAF8094531.1        | 65.738 | 718  | 7   | 712  | 0         | Other-RLK | same      |
| At_RFO1        | Other-RLK | Sal | KAF8064809.1        | 64.951 | 719  | 2   | 710  | 0         | Other-RLK | same      |
| At_RFO1        | Other-RLK | Sal | KAF8094532.1        | 62.467 | 762  | 2   | 751  | 0         | Other-RLK | same      |
| At_RFO2        | LRR-RLP   | Sal | KAF8045120.1        | 60.569 | 246  | 504 | 749  | 2.49E-102 | LRR-RLP   | same      |
| At_RFO2        | LRR-RLP   | Sal | KAF8106071.1        | 70.968 | 713  | 28  | 740  | 0         | LRR-RLP   | same      |
| At_RFO2        | LRR-RLP   | Sal | KAF8080653.1        | 66.572 | 703  | 47  | 749  | 0         | LRR-RLP   | same      |
| At_RFO2        | LRR-RLP   | Sal | KAF8099526.1        | 66.527 | 717  | 32  | 748  | 0         | LRR-RLK   | different |
| At_RFO2        | LRR-RLP   | Sal | KAF8114266.1        | 65.84  | 726  | 6   | 730  | 0         | LRR-RLP   | same      |
| At_RFO3        | Other-RLK | Sal | KAF8109710.1        | 61.441 | 236  | 515 | 750  | 1.37E-101 | Other-RLK | same      |
| At_RFO3        | Other-RLK | Sal | KAF8083319.1        | 74.419 | 731  | 2   | 705  | 0         | Other-RLK | same      |
| At_RFO3        | Other-RLK | Sal | KAF8080741.1        | 71.512 | 681  | 191 | 850  | 0         | Other-RLK | same      |
| At_RFO3        | Other-RLK | Sal | KAF8107361.1        | 65.136 | 958  | 1   | 850  | 0         | Other-RLK | same      |
| At_RLM1a       | TNL       | Sal | KAF8087217.1        | 60.131 | 153  | 1   | 152  | 3.03E-58  | TX        | different |
| At_RLM1a       | TNL       | Sal | KAF8081485.1        | 64.286 | 154  | 5   | 158  | 1.12E-66  | TX        | different |
| At_RLM1a       | TNL       | Sal | KAF8094300.1        | 60.34  | 1001 | 3   | 993  | 0         | TNL       | same      |
| At_RLM1b       | TNL       | Sal | KAF8082878.1        | 63.628 | 1031 | 1   | 993  | 0         | TNL       | same      |
| At_RLM1b       | TNL       | Sal | KAF8094299.1        | 61.049 | 991  | 1   | 981  | 0         | TNL       | same      |
| At_RLP1        | LRR-RLP   | Sal | KAF8104053.1        | 80.037 | 1082 | 1   | 1076 | 0         | LRR-RLP   | same      |
| At_RLP23       | LRR-RLP   | Sal | KAF8096091.1        | 62.559 | 211  | 678 | 888  | 2.73E-81  | LRR-RLP   | same      |
| At_RLP23       | LRR-RLP   | Sal | KAF8053593.1        | 71.579 | 380  | 509 | 888  | 0         | LRR-RLP   | same      |
| At_RLP23       | LRR-RLP   | Sal | KAF8112028.1        | 69.451 | 874  | 19  | 890  | 0         | LRR-RLP   | same      |
| At_RLP23       | LRR-RLP   | Sal | KAF8096085.1        | 68.65  | 874  | 19  | 890  | 0         | LRR-RLP   | same      |
| At_RLP23       | LRR-RLP   | Sal | KAF8108771.1        | 68.276 | 870  | 18  | 887  | 0         | LRR-RLP   | same      |
| At_RLP23       | LRR-RLP   | Sal | KAF8092581.1        | 67.95  | 883  | 1   | 881  | 0         | LRR-RLP   | same      |
| At_RLP23       | LRR-RLP   | Sal | KAF8108774.1        | 67.808 | 876  | 17  | 890  | 0         | LRR-RLP   | same      |
| At_RLP23       | LRR-RLP   | Sal | KAF8045493.1        | 65.694 | 720  | 175 | 889  | 0         | LRR-RLP   | same      |
| At_RLP23       | LRR-RLP   | Sal | KAF8084401.1        | 64.831 | 708  | 182 | 888  | 0         | LRR-RLP   | same      |
| At_RLP23       | LRR-RLP   | Sal | KAF8092574.1        | 64.779 | 724  | 171 | 889  | 0         | LRR-RLP   | same      |
| At_RLP23       | LRR-RLP   | Sal | KAF8053603.1        | 64.505 | 586  | 290 | 874  | 0         | LRR-RLP   | same      |
| At_RLP23       | LRR-RLP   | Sal | KAF8105233.1        | 63.7   | 719  | 175 | 889  | 0         | LRR-RLP   | same      |
| At_RLP23       | LRR-RLP   | Sal | KAF8105234.1        | 63.352 | 704  | 175 | 876  | 0         | LRR-RLP   | same      |
| At_RLP32       | LRR-RLP   | Sal | KAF8092002.1        | 70.136 | 221  | 634 | 854  | 1.64E-88  | LRR-RLP   | same      |
| At_RLP32       | LRR-RLP   | Sal | KAF8085576.1        | 74.682 | 865  | 1   | 865  | 0         | LRR-RLP   | same      |
| At_RLP32       | LRR-RLP   | Sal | KAF8085575.1        | 74.51  | 867  | 1   | 867  | 0         | LRR-RLP   | same      |
| At_RLP32       | LRR-RLP   | Sal | KAF8083537.1        | 64.058 | 754  | 118 | 863  | 0         | LRR-RLP   | same      |
| At_RLP32       | LRR-RLP   | Sal | KAF8106575.1        | 60.088 | 912  | 1   | 852  | 0         | LRR-RLP   | same      |
| At_RLP42       | LRR-RLP   | Sal | KAF8096091.1        | 73.653 | 167  | 679 | 845  | 5.44E-82  | LRR-RLP   | same      |
| At_RLP42       | LRR-RLP   | Sal | KAF8053593.1        | 73.973 | 365  | 512 | 876  | 0         | LRR-RLP   | same      |



|                |           |     |              |        |      |     |      |           |           |           |
|----------------|-----------|-----|--------------|--------|------|-----|------|-----------|-----------|-----------|
| At_RLP42       | LRR-RLP   | Sal | KAF8108774.1 | 68.354 | 869  | 18  | 880  | 0         | LRR-RLP   | same      |
| At_RLP42       | LRR-RLP   | Sal | KAF8112028.1 | 67.857 | 868  | 19  | 880  | 0         | LRR-RLP   | same      |
| At_RLP42       | LRR-RLP   | Sal | KAF8096085.1 | 67.166 | 868  | 19  | 880  | 0         | LRR-RLP   | same      |
| At_RLP42       | LRR-RLP   | Sal | KAF8108771.1 | 66.047 | 860  | 18  | 876  | 0         | LRR-RLP   | same      |
| At_RLP42       | LRR-RLP   | Sal | KAF8092581.1 | 64.739 | 882  | 1   | 877  | 0         | LRR-RLP   | same      |
| At_RLP42       | LRR-RLP   | Sal | KAF8084401.1 | 64.023 | 706  | 175 | 879  | 0         | LRR-RLP   | same      |
| At_RLP42       | LRR-RLP   | Sal | KAF8053603.1 | 63.621 | 580  | 291 | 868  | 0         | LRR-RLP   | same      |
| At_RLP42       | LRR-RLP   | Sal | KAF8045493.1 | 63.319 | 717  | 183 | 889  | 0         | LRR-RLP   | same      |
| At_RLP42       | LRR-RLP   | Sal | KAF8092574.1 | 62.762 | 717  | 183 | 889  | 0         | LRR-RLP   | same      |
| At_RLP42       | LRR-RLP   | Sal | KAF8105234.1 | 62.572 | 692  | 182 | 870  | 0         | LRR-RLP   | same      |
| At_RLP42       | LRR-RLP   | Sal | KAF8105233.1 | 62.375 | 699  | 182 | 876  | 0         | LRR-RLP   | same      |
| At_RPM1        | NL        | Sal | KAF8094635.1 | 83.118 | 930  | 1   | 926  | 0         | NL        | same      |
| At_RPP1        | TNL       | Sal | KAF8081485.1 | 60.39  | 154  | 89  | 242  | 5.32E-62  | TX        | different |
| At_RPP1        | TNL       | Sal | KAF8085339.1 | 66.071 | 168  | 94  | 261  | 9.92E-74  | TX        | different |
| At_RPP1        | TNL       | Sal | KAF8077018.1 | 72.193 | 187  | 94  | 280  | 2.26E-93  | TX        | different |
| At_RPP1        | TNL       | Sal | KAF8086279.1 | 69.589 | 365  | 95  | 459  | 1.03E-179 | TN        | different |
| At_RPP13       | CNL       | Sal | KAF8116607.1 | 68.421 | 836  | 1   | 829  | 0         | CNL       | same      |
| At_RPP2a       | TNL       | Sal | KAF8077026.1 | 60.391 | 409  | 10  | 414  | 5.89E-146 | TNL       | same      |
| At_RPP2a       | TNL       | Sal | KAF8102895.1 | 70.239 | 877  | 427 | 1300 | 0         | TNL       | same      |
| At_RPP2a       | TNL       | Sal | KAF8102896.1 | 68.529 | 877  | 427 | 1300 | 0         | TNL       | same      |
| At_RPP2b       | TNL       | Sal | KAF8102897.1 | 73.64  | 1195 | 1   | 1193 | 0         | TNL       | same      |
| At_RPP39       | CNL       | Sal | KAF8044555.1 | 71.084 | 415  | 1   | 415  | 0         | CN        | different |
| At_RPP39       | CNL       | Sal | KAF8098363.1 | 65.84  | 887  | 1   | 870  | 0         | CNL       | same      |
| At_RPP39       | CNL       | Sal | KAF8062888.1 | 64.972 | 885  | 1   | 878  | 0         | CNL       | same      |
| At_RPP39       | CNL       | Sal | KAF8084217.1 | 62.76  | 913  | 1   | 870  | 0         | CNL       | same      |
| At_RPP7        | NL        | Sal | KAF8116723.1 | 62.743 | 875  | 1   | 866  | 0         | CNL       | different |
| At_RPP7        | NL        | Sal | KAF8092678.1 | 61.859 | 624  | 1   | 620  | 0         | NL        | same      |
| At_RPP8        | CNL       | Sal | KAF8080154.1 | 63.428 | 916  | 1   | 904  | 0         | CNL       | same      |
| At_RPP8        | CNL       | Sal | KAF8105614.1 | 63.2   | 750  | 1   | 740  | 0         | CNL       | same      |
| At_RPP8        | CNL       | Sal | KAF8101775.1 | 62.882 | 916  | 1   | 903  | 0         | CNL       | same      |
| At_RPP8        | CNL       | Sal | KAF8105615.1 | 61.209 | 910  | 1   | 903  | 0         | CNL       | same      |
| At_RPP8        | CNL       | Sal | KAF8105611.1 | 61.209 | 910  | 1   | 903  | 0         | CNL       | same      |
| At_RPP8        | CNL       | Sal | KAF8093800.1 | 60.898 | 913  | 1   | 903  | 0         | CNL       | same      |
| At_RPS2        | NL        | Sal | KAF8114000.1 | 83.956 | 910  | 1   | 909  | 0         | CNL       | different |
| At_RPS5        | TNL       | Sal | KAF8044716.1 | 65.163 | 399  | 1   | 399  | 0         | CN        | different |
| At_RPS5        | TNL       | Sal | KAF8087363.1 | 64.779 | 883  | 1   | 880  | 0         | CNL       | different |
| At_RPS5        | TNL       | Sal | KAF8111125.1 | 63.229 | 892  | 1   | 881  | 0         | CNL       | different |
| At_RPS5        | TNL       | Sal | KAF8098474.1 | 62.812 | 882  | 1   | 880  | 0         | CNL       | different |
| At_RPS5        | TNL       | Sal | KAF8058996.1 | 61.4   | 886  | 1   | 881  | 0         | CNL       | different |
| At_RPS5        | TNL       | Sal | KAF8098470.1 | 61.338 | 882  | 1   | 880  | 0         | CNL       | different |
| At_SOIR1       | LRR-RLK   | Sal | KAF8096053.1 | 81.719 | 640  | 6   | 640  | 0         | LRR-RLK   | same      |
| At_SOIR1       | LRR-RLK   | Sal | KAF8086968.1 | 80.65  | 646  | 1   | 641  | 0         | LRR-RLK   | same      |
| At_WRR12       | TNL       | Sal | KAF8114288.1 | 83.049 | 1056 | 3   | 1049 | 0         | TNL       | same      |
| At_WRR4a       | TNL       | Sal | KAF8087217.1 | 62.581 | 155  | 1   | 153  | 1.53E-58  | TX        | different |
| At_WRR4a       | TNL       | Sal | KAF8081485.1 | 67.516 | 157  | 1   | 157  | 3.47E-69  | TX        | different |
| At_WRR4b       | TNL       | Sal | KAF8087217.1 | 63.576 | 151  | 4   | 153  | 2.18E-60  | TX        | different |
| At_WRR4b       | TNL       | Sal | KAF8081485.1 | 68.831 | 154  | 6   | 159  | 8.74E-71  | TX        | different |
| At_WRR8        | TNL       | Sal | KAF8118565.1 | 68.675 | 166  | 20  | 182  | 3.94E-72  | TX        | different |
| At_WRR8        | TNL       | Sal | KAF8044651.1 | 72.807 | 342  | 19  | 357  | 2.44E-173 | TN        | different |
| Bju_WRR1       | CNL       | Sal | KAF8101775.1 | 82.508 | 909  | 1   | 905  | 0         | CNL       | same      |
| Bju_WRR1       | CNL       | Sal | KAF8105611.1 | 70.374 | 908  | 1   | 904  | 0         | CNL       | same      |
| Bju_WRR1       | CNL       | Sal | KAF8105615.1 | 69.846 | 912  | 1   | 904  | 0         | CNL       | same      |
| Bju_WRR1       | CNL       | Sal | KAF8105614.1 | 69.721 | 753  | 1   | 745  | 0         | CNL       | same      |
| Bna_LepR3/Rlm2 | LRR-RLP   | Sal | KAF8092002.1 | 66.239 | 234  | 718 | 950  | 1.86E-85  | LRR-RLP   | same      |
| Bna_LepR3/Rlm2 | LRR-RLP   | Sal | KAF8100137.1 | 71.067 | 712  | 1   | 708  | 0         | LRR-RLP   | same      |
| Bna_LepR3/Rlm2 | LRR-RLP   | Sal | KAF8085575.1 | 60.302 | 796  | 163 | 948  | 0         | LRR-RLP   | same      |
| Bna_LepR3/Rlm2 | LRR-RLP   | Sal | KAF8085576.1 | 60.302 | 796  | 163 | 948  | 0         | LRR-RLP   | same      |
| Bna_Rlm9/4/7   | Other-RLK | Sal | KAF8091446.1 | 69.955 | 223  | 575 | 793  | 6.20E-95  | Other-RLK | same      |
| Bna_Rlm9/4/7   | Other-RLK | Sal | KAF8103088.1 | 84.757 | 761  | 1   | 760  | 0         | Other-RLK | same      |
| Bol_FocBo1     | TNL       | Sal | KAF8081485.1 | 63.333 | 150  | 5   | 154  | 2.80E-60  | TX        | different |
| Bol_FocBo1     | TNL       | Sal | KAF8087217.1 | 64.43  | 149  | 5   | 152  | 1.70E-63  | TX        | different |
| Bra_cRa/cRb    | TNL       | Sal | KAF8085339.1 | 64.848 | 165  | 73  | 237  | 3.81E-67  | TX        | different |
| Bra_cRa/cRb    | TNL       | Sal | KAF8077018.1 | 63.784 | 185  | 73  | 257  | 1.13E-75  | TX        | different |
| Bra_cRa/cRb    | TNL       | Sal | KAF8101393.1 | 66.821 | 1296 | 1   | 1268 | 0         | TNL       | same      |
| Bra_cRa/cRb    | TNL       | Sal | KAF8114966.1 | 64.456 | 754  | 1   | 734  | 0         | TNL       | same      |
| Bra_Crr1a      | TNL       | Sal | KAF8087217.1 | 60.897 | 156  | 57  | 211  | 1.34E-61  | TX        | different |
| Bra_Crr1a      | TNL       | Sal | KAF8087555.1 | 65.541 | 148  | 67  | 214  | 3.34E-64  | TX        | different |
| Bra_Crr1a      | TNL       | Sal | KAF8085339.1 | 64.458 | 166  | 67  | 232  | 2.18E-70  | TX        | different |
| Bra_Crr1a      | TNL       | Sal | KAF8077018.1 | 64.583 | 192  | 67  | 258  | 1.72E-82  | TX        | different |
| Bra_Crr1a      | TNL       | Sal | KAF8090866.1 | 60.082 | 243  | 68  | 310  | 1.45E-90  | TN        | different |
| Bra_Crr1a      | TNL       | Sal | KAF8114966.1 | 80.15  | 665  | 66  | 730  | 0         | TNL       | same      |
| Bra_Crr1a      | TNL       | Sal | KAF8114969.1 | 64.056 | 1213 | 1   | 1090 | 0         | Other-NLR | different |
| Bra_Crr1a      | TNL       | Sal | KAF8082977.1 | 61.825 | 1260 | 66  | 1214 | 0         | TNL       | same      |
| At_BAK1        | LRR-RLK   | Tar | Ta02674      | 95.61  | 615  | 1   | 615  | 0         | LRR-RLK   | same      |
| At_BAK1        | LRR-RLK   | Tar | Ta11929      | 77.419 | 620  | 24  | 615  | 0         | LRR-RLK   | same      |
| At_BAK1        | LRR-RLK   | Tar | Ta19321      | 74.92  | 622  | 13  | 615  | 0         | LRR-RLK   | same      |
| At_BAK1        | LRR-RLK   | Tar | Ta25247      | 64.646 | 594  | 10  | 555  | 0         | LRR-RLK   | same      |
| At_FLS2        | LRR-RLK   | Tar | Ta04995      | 81.624 | 1170 | 1   | 1166 | 0         | LRR-RLK   | same      |
| At_NGR1a       | RNL       | Tar | Ta02427      | 67.07  | 413  | 404 | 809  | 3.01E-178 | CNL       | different |
| At_NGR1a       | RNL       | Tar | Ta02428      | 77.985 | 804  | 12  | 809  | 0         | CNL       | different |
| At_NGR1a       | RNL       | Tar | Ta02427      | 65.239 | 817  | 7   | 803  | 0         | CNL       | different |
| At_NGR1b       | RNL       | Tar | Ta02427      | 60.412 | 437  | 387 | 815  | 2.77E-163 | CNL       | different |
| At_NGR1b       | RNL       | Tar | Ta02428      | 67.611 | 812  | 14  | 815  | 0         | CNL       | different |
| At_NGR1b       | RNL       | Tar | Ta02427      | 64.015 | 817  | 9   | 810  | 0         | CNL       | different |
| At_RAC1        | TNL       | Tar | Ta08988      | 68.345 | 278  | 160 | 437  | 2.54E-102 | NL        | different |
| At_RAC1        | TNL       | Tar | Ta24801      | 60.567 | 388  | 9   | 393  | 2.66E-145 | TX        | different |



|                |           |     |         |        |      |      |      |           |           |           |
|----------------|-----------|-----|---------|--------|------|------|------|-----------|-----------|-----------|
| At_RFO1        | Other-RLK | Tar | Ta03721 | 81.743 | 241  | 446  | 686  | 7.10E-127 | Other-RLK | same      |
| At_RFO1        | Other-RLK | Tar | Ta03916 | 60.187 | 427  | 325  | 747  | 1.27E-154 | Other-RLK | same      |
| At_RFO1        | Other-RLK | Tar | Ta06877 | 87.225 | 728  | 22   | 740  | 0         | Other-RLK | same      |
| At_RFO1        | Other-RLK | Tar | Ta06876 | 73.881 | 402  | 309  | 698  | 0         | Other-RLK | same      |
| At_RFO1        | Other-RLK | Tar | Ta03721 | 68.543 | 693  | 12   | 696  | 0         | Other-RLK | same      |
| At_RFO1        | Other-RLK | Tar | Ta03721 | 64.636 | 755  | 10   | 751  | 0         | Other-RLK | same      |
| At_RFO1        | Other-RLK | Tar | Ta03721 | 63.102 | 748  | 1    | 715  | 0         | Other-RLK | same      |
| At_RFO2        | LRR-RLP   | Tar | Ta20922 | 72.184 | 719  | 19   | 737  | 0         | LRR-RLK   | different |
| At_RFO2        | LRR-RLP   | Tar | Ta03822 | 70.822 | 754  | 1    | 753  | 0         | LRR-RLP   | same      |
| At_RFO3        | Other-RLK | Tar | Ta08744 | 60.173 | 231  | 515  | 745  | 1.07E-82  | Other-RLK | same      |
| At_RFO3        | Other-RLK | Tar | Ta16704 | 71.547 | 847  | 30   | 850  | 0         | Other-RLK | same      |
| At_RFO3        | Other-RLK | Tar | Ta16704 | 68.303 | 937  | 1    | 849  | 0         | Other-RLK | same      |
| At_RLM1a       | TNL       | Tar | Ta16523 | 60.234 | 171  | 16   | 183  | 1.53E-52  | TN        | different |
| At_RLM1a       | TNL       | Tar | Ta25952 | 63.087 | 149  | 10   | 158  | 4.55E-59  | TX        | different |
| At_RLM1a       | TNL       | Tar | Ta16522 | 76.159 | 151  | 8    | 158  | 2.98E-76  | TX        | different |
| At_RLM1a       | TNL       | Tar | Ta16523 | 69.466 | 262  | 164  | 423  | 3.97E-105 | TN        | different |
| At_RLM1b       | TNL       | Tar | Ta16523 | 60.465 | 172  | 15   | 184  | 1.59E-53  | TN        | different |
| At_RLM1b       | TNL       | Tar | Ta16523 | 68.679 | 265  | 164  | 426  | 7.70E-104 | TN        | different |
| At_RLM1b       | TNL       | Tar | Ta15205 | 60.211 | 284  | 437  | 720  | 7.64E-108 | LRR-RLP   | different |
| At_RLM1b       | TNL       | Tar | Ta15202 | 63.58  | 648  | 372  | 1009 | 0         | NL        | different |
| At_RLM3        | TN        | Tar | Ta19917 | 60.432 | 278  | 159  | 427  | 3.56E-94  | NL        | different |
| At_RLM3        | TN        | Tar | Ta20013 | 60.65  | 277  | 159  | 427  | 1.44E-105 | NL        | different |
| At_RLP1        | LRR-RLP   | Tar | Ta12797 | 73.426 | 1080 | 1    | 1077 | 0         | LRR-RLP   | same      |
| At_RLP23       | LRR-RLP   | Tar | Ta22122 | 66.168 | 869  | 22   | 890  | 0         | LRR-RLP   | same      |
| At_RLP23       | LRR-RLP   | Tar | Ta13179 | 65.266 | 714  | 175  | 885  | 0         | LRR-RLP   | same      |
| At_RLP23       | LRR-RLP   | Tar | Ta20228 | 63.164 | 866  | 20   | 874  | 0         | LRR-RLP   | same      |
| At_RLP30       | LRR-RLP   | Tar | Ta11898 | 66.514 | 218  | 569  | 783  | 1.81E-73  | LRR-RLP   | same      |
| At_RLP30       | LRR-RLP   | Tar | Ta11897 | 69.5   | 200  | 581  | 779  | 6.24E-85  | LRR-RLP   | same      |
| At_RLP30       | LRR-RLP   | Tar | Ta13655 | 61.314 | 274  | 485  | 754  | 1.59E-105 | LRR-RLP   | same      |
| At_RLP32       | LRR-RLP   | Tar | Ta23201 | 77.181 | 149  | 655  | 803  | 6.87E-69  | LRR-RLP   | same      |
| At_RLP32       | LRR-RLP   | Tar | Ta14238 | 73.016 | 189  | 418  | 606  | 2.72E-77  | LRR-RLP   | same      |
| At_RLP32       | LRR-RLP   | Tar | Ta16681 | 63.559 | 236  | 612  | 846  | 4.76E-83  | LRR-RLP   | same      |
| At_RLP32       | LRR-RLP   | Tar | Ta27115 | 61.635 | 318  | 159  | 475  | 2.63E-106 | LRR-RLP   | same      |
| At_RLP32       | LRR-RLP   | Tar | Ta27222 | 71.605 | 243  | 612  | 854  | 5.76E-117 | LRR-RLP   | same      |
| At_RLP32       | LRR-RLP   | Tar | Ta23208 | 63.784 | 370  | 159  | 527  | 1.37E-136 | LRR-RLP   | same      |
| At_RLP32       | LRR-RLP   | Tar | Ta23209 | 70.06  | 668  | 187  | 853  | 0         | LRR-RLP   | same      |
| At_RLP32       | LRR-RLP   | Tar | Ta16684 | 69.973 | 736  | 114  | 848  | 0         | LRR-RLP   | same      |
| At_RLP32       | LRR-RLP   | Tar | Ta19632 | 68.732 | 710  | 159  | 866  | 0         | LRR-RLP   | same      |
| At_RLP32       | LRR-RLP   | Tar | Ta14240 | 66.98  | 745  | 113  | 856  | 0         | LRR-RLP   | same      |
| At_RLP32       | LRR-RLP   | Tar | Ta16686 | 66.234 | 770  | 90   | 852  | 0         | LRR-RLP   | same      |
| At_RLP32       | LRR-RLP   | Tar | Ta26856 | 65.672 | 737  | 113  | 848  | 0         | LRR-RLP   | same      |
| At_RLP32       | LRR-RLP   | Tar | Ta17948 | 65.195 | 589  | 281  | 868  | 0         | LRR-RLP   | same      |
| At_RLP32       | LRR-RLP   | Tar | Ta14238 | 64.175 | 709  | 42   | 744  | 0         | LRR-RLP   | same      |
| At_RLP32       | LRR-RLP   | Tar | Ta14238 | 63.931 | 865  | 4    | 866  | 0         | LRR-RLP   | same      |
| At_RLP42       | LRR-RLP   | Tar | Ta22122 | 64.245 | 867  | 18   | 880  | 0         | LRR-RLP   | same      |
| At_RLP42       | LRR-RLP   | Tar | Ta13179 | 63.623 | 701  | 182  | 876  | 0         | LRR-RLP   | same      |
| At_RLP42       | LRR-RLP   | Tar | Ta20228 | 62.545 | 841  | 37   | 868  | 0         | LRR-RLP   | same      |
| At_RPM1        | NL        | Tar | Ta04171 | 83.459 | 931  | 1    | 926  | 0         | NL        | same      |
| At_RPP1        | TNL       | Tar | Ta23923 | 71.975 | 157  | 85   | 241  | 4.17E-73  | TX        | different |
| At_RPP1        | TNL       | Tar | Ta23545 | 60.905 | 243  | 248  | 490  | 2.65E-93  | NBS       | different |
| At_RPP13       | CNL       | Tar | Ta23819 | 65.333 | 375  | 1    | 375  | 2.51E-151 | CN        | different |
| At_RPP13       | CNL       | Tar | Ta21221 | 66.228 | 835  | 1    | 830  | 0         | CNL       | same      |
| At_RPP2a       | TNL       | Tar | Ta19917 | 64.706 | 255  | 161  | 414  | 9.00E-91  | NL        | different |
| At_RPP2a       | TNL       | Tar | Ta19921 | 63.386 | 254  | 161  | 414  | 3.09E-91  | NL        | different |
| At_RPP2a       | TNL       | Tar | Ta20013 | 65.354 | 254  | 161  | 414  | 7.22E-99  | NL        | different |
| At_RPP2a       | TNL       | Tar | Ta10587 | 68.592 | 277  | 138  | 414  | 3.12E-102 | NL        | different |
| At_RPP2a       | TNL       | Tar | Ta12833 | 80     | 245  | 1056 | 1300 | 1.81E-122 | TNL       | same      |
| At_RPP2a       | TNL       | Tar | Ta13049 | 72.606 | 825  | 476  | 1299 | 0         | TNL       | same      |
| At_RPP2a       | TNL       | Tar | Ta12836 | 71.413 | 906  | 408  | 1299 | 0         | TNL       | same      |
| At_RPP2b       | TNL       | Tar | Ta12832 | 78.404 | 426  | 752  | 1165 | 0         | NL        | different |
| At_RPP2b       | TNL       | Tar | Ta12834 | 74.979 | 1187 | 1    | 1185 | 0         | Other-NLR | different |
| At_RPP2b       | TNL       | Tar | Ta13049 | 73.391 | 1041 | 127  | 1165 | 0         | TNL       | same      |
| At_RPP39       | CNL       | Tar | Ta19294 | 77.37  | 327  | 171  | 497  | 3.08E-178 | CNL       | same      |
| At_RPP39       | CNL       | Tar | Ta19295 | 67.098 | 851  | 42   | 868  | 0         | CNL       | same      |
| At_RPP4        | TNL       | Tar | Ta10587 | 61.168 | 291  | 812  | 1100 | 1.40E-93  | NL        | different |
| At_RPP4        | TNL       | Tar | Ta19917 | 64.539 | 282  | 163  | 443  | 2.90E-103 | NL        | different |
| At_RPP5        | TNL       | Tar | Ta19917 | 66.667 | 279  | 166  | 443  | 5.66E-104 | NL        | different |
| At_RPP7        | NL        | Tar | Ta23683 | 63.291 | 158  | 12   | 168  | 9.80E-52  | NL        | same      |
| At_RPP7        | NL        | Tar | Ta25896 | 63.714 | 700  | 1    | 694  | 0         | NL        | same      |
| At_RPP8        | CNL       | Tar | Ta18815 | 73.684 | 247  | 1    | 247  | 2.03E-125 | CN        | different |
| At_RPP8        | CNL       | Tar | Ta01723 | 65.359 | 918  | 1    | 906  | 0         | NL        | different |
| At_RPS2        | NL        | Tar | Ta01530 | 85.479 | 909  | 1    | 909  | 0         | CNL       | different |
| At_RPS4        | TNL       | Tar | Ta12930 | 65.145 | 241  | 953  | 1193 | 1.01E-93  | NL        | different |
| At_RPS4        | TNL       | Tar | Ta12930 | 61.854 | 1025 | 129  | 1139 | 0         | NL        | different |
| At_RPS5        | TNL       | Tar | Ta25636 | 72.237 | 371  | 65   | 432  | 0         | NBS       | different |
| At_RRS1        | TNL       | Tar | Ta12928 | 68.132 | 273  | 497  | 766  | 2.62E-112 | NL        | different |
| At_SOIR1       | LRR-RLK   | Tar | Ta14326 | 85.358 | 642  | 1    | 641  | 0         | LRR-RLK   | same      |
| At_WRR4b       | TNL       | Tar | Ta16523 | 61.272 | 173  | 16   | 185  | 9.26E-55  | TN        | different |
| At_WRR4b       | TNL       | Tar | Ta25952 | 65.101 | 149  | 11   | 159  | 8.91E-61  | TX        | different |
| At_WRR4b       | TNL       | Tar | Ta16523 | 62.205 | 254  | 165  | 416  | 1.06E-84  | TN        | different |
| At_WRR8        | TNL       | Tar | Ta08988 | 67.021 | 282  | 170  | 451  | 7.48E-105 | NL        | different |
| At_WRR8        | TNL       | Tar | Ta24801 | 63.239 | 389  | 20   | 404  | 7.20E-155 | TX        | different |
| At_WRR9        | NL        | Tar | Ta16523 | 61.132 | 265  | 168  | 430  | 1.32E-88  | TN        | different |
| Bju_WRR1       | CNL       | Tar | Ta18815 | 70.492 | 244  | 1    | 239  | 1.32E-117 | CN        | different |
| Bju_WRR1       | CNL       | Tar | Ta09903 | 61.079 | 686  | 141  | 813  | 0         | NL        | different |
| Bna_LepR3/Rlm2 | LRR-RLP   | Tar | Ta14238 | 64.398 | 191  | 502  | 692  | 4.29E-65  | LRR-RLP   | same      |

|                |           |     |              |        |      |     |      |           |           |           |
|----------------|-----------|-----|--------------|--------|------|-----|------|-----------|-----------|-----------|
| Bna_LepR3/Rlm2 | LRR-RLP   | Tar | Ta23201      | 68.478 | 184  | 738 | 920  | 8.35E-69  | LRR-RLP   | same      |
| Bna_LepR3/Rlm2 | LRR-RLP   | Tar | Ta27222      | 66.016 | 256  | 696 | 950  | 5.93E-112 | LRR-RLP   | same      |
| Bna_LepR3/Rlm2 | LRR-RLP   | Tar | Ta23208      | 60.49  | 367  | 247 | 610  | 5.89E-116 | LRR-RLP   | same      |
| Bna_LepR3/Rlm2 | LRR-RLP   | Tar | Ta19632      | 65.581 | 706  | 247 | 948  | 0         | LRR-RLP   | same      |
| Bna_LepR3/Rlm2 | LRR-RLP   | Tar | Ta14238      | 64.721 | 754  | 198 | 948  | 0         | LRR-RLP   | same      |
| Bna_LepR3/Rlm2 | LRR-RLP   | Tar | Ta23209      | 64.157 | 664  | 276 | 938  | 0         | LRR-RLP   | same      |
| Bna_LepR3/Rlm2 | LRR-RLP   | Tar | Ta16684      | 63.09  | 848  | 106 | 950  | 0         | LRR-RLP   | same      |
| Bna_LepR3/Rlm2 | LRR-RLP   | Tar | Ta17948      | 62.544 | 566  | 370 | 931  | 0         | LRR-RLP   | same      |
| Bna_LepR3/Rlm2 | LRR-RLP   | Tar | Ta16686      | 62.423 | 809  | 137 | 933  | 0         | LRR-RLP   | same      |
| Bna_LepR3/Rlm2 | LRR-RLP   | Tar | Ta14238      | 61.201 | 683  | 148 | 827  | 0         | LRR-RLP   | same      |
| Bna_Rlm9/4/7   | Other-RLK | Tar | Ta03721      | 74.699 | 249  | 477 | 725  | 1.94E-114 | Other-RLK | same      |
| Bna_Rlm9/4/7   | Other-RLK | Tar | Ta03916      | 66.412 | 393  | 401 | 790  | 7.22E-149 | Other-RLK | same      |
| Bna_Rlm9/4/7   | Other-RLK | Tar | Ta06876      | 70.277 | 397  | 344 | 730  | 0         | Other-RLK | same      |
| Bna_Rlm9/4/7   | Other-RLK | Tar | Ta22586      | 64.653 | 778  | 28  | 793  | 0         | Other-RLK | same      |
| Bna_Rlm9/4/7   | Other-RLK | Tar | Ta22585      | 63.602 | 805  | 1   | 793  | 0         | Other-RLK | same      |
| Bna_Rlm9/4/7   | Other-RLK | Tar | Ta06877      | 61.675 | 788  | 23  | 794  | 0         | Other-RLK | same      |
| Bol_FocBo1     | TNL       | Tar | Ta19917      | 60.3   | 267  | 516 | 780  | 1.04E-88  | NL        | different |
| Bol_FocBo1     | TNL       | Tar | Ta19917      | 74.483 | 290  | 160 | 448  | 6.67E-127 | NL        | different |
| Bol_FocBo1     | TNL       | Tar | Ta19921      | 72.509 | 291  | 160 | 450  | 3.11E-131 | NL        | different |
| Bra_Crr1a      | TNL       | Tar | Ta16118      | 60.377 | 212  | 585 | 793  | 6.08E-69  | NL        | different |
| At_BAK1        | LRR-RLK   | Tpa | c0014_00534  | 95.447 | 615  | 1   | 615  | 0         | LRR-RLK   | same      |
| At_BAK1        | LRR-RLK   | Tpa | c0010_00354  | 79.736 | 607  | 10  | 615  | 0         | LRR-RLK   | same      |
| At_BAK1        | LRR-RLK   | Tpa | c0122_00010  | 79.008 | 605  | 24  | 615  | 0         | LRR-RLK   | same      |
| At_BAK1        | LRR-RLK   | Tpa | c0012_00490  | 79.008 | 605  | 24  | 615  | 0         | LRR-RLK   | same      |
| At_BAK1        | LRR-RLK   | Tpa | c0001_02630  | 73.226 | 620  | 11  | 615  | 0         | LRR-RLK   | same      |
| At_FLS2        | LRR-RLK   | Tpa | c0003_01788  | 81.392 | 790  | 386 | 1173 | 0         | LRR-RLK   | same      |
| At_NGR1a       | RNL       | Tpa | c0003_00095  | 78.773 | 815  | 1   | 809  | 0         | NL        | different |
| At_NGR1a       | RNL       | Tpa | c0362_00004  | 77.273 | 814  | 1   | 809  | 0         | NL        | different |
| At_NGR1a       | RNL       | Tpa | c0003_00094  | 68.069 | 808  | 15  | 809  | 0         | CNL       | different |
| At_NGR1b       | RNL       | Tpa | c0003_00095  | 67.072 | 823  | 5   | 815  | 0         | NL        | different |
| At_NGR1b       | RNL       | Tpa | c0362_00004  | 65.45  | 822  | 5   | 815  | 0         | NL        | different |
| At_NGR1b       | RNL       | Tpa | c0003_00094  | 62.699 | 815  | 16  | 815  | 0         | CNL       | different |
| At_RFO1        | Other-RLK | Tpa | c0001_01253  | 63.66  | 754  | 8   | 751  | 0         | Other-RLK | same      |
| At_RFO1        | Other-RLK | Tpa | c0001_01254  | 62.74  | 730  | 7   | 718  | 0         | Other-RLK | same      |
| At_RFO2        | LRR-RLP   | Tpa | c0187_00006  | 65.765 | 739  | 13  | 748  | 0         | LRR-RLK   | different |
| At_RFO2        | LRR-RLP   | Tpa | c0012_00540  | 65.765 | 739  | 13  | 748  | 0         | LRR-RLK   | different |
| At_RFO2        | LRR-RLP   | Tpa | c0001_01341  | 64.267 | 750  | 6   | 754  | 0         | LRR-RLP   | same      |
| At_RFO3        | Other-RLK | Tpa | c0005_01418  | 66.784 | 855  | 15  | 850  | 0         | Other-RLK | same      |
| At_RLM1a       | TNL       | Tpa | c0009_00368  | 60.819 | 171  | 13  | 183  | 7.92E-64  | TX        | different |
| At_RLM1a       | TNL       | Tpa | c0026_00082  | 69.613 | 181  | 1   | 181  | 2.42E-87  | TX        | different |
| At_RLM1a       | TNL       | Tpa | c0007_00316  | 60.274 | 438  | 187 | 621  | 0         | NL        | different |
| At_RLM1b       | TNL       | Tpa | c0026_00082  | 76.536 | 179  | 1   | 179  | 1.77E-93  | TX        | different |
| At_RLM1b       | TNL       | Tpa | c0026_00081  | 66.176 | 1020 | 7   | 1009 | 0         | Other-NLR | different |
| At_RLM3        | TN        | Tpa | c0006_00829  | 64.103 | 156  | 1   | 153  | 3.17E-62  | TX        | different |
| At_RLP1        | LRR-RLP   | Tpa | c0001_00531  | 79.573 | 1077 | 1   | 1077 | 0         | LRR-RLP   | same      |
| At_RLP1        | LRR-RLP   | Tpa | c0136_00002g | 67.864 | 1002 | 24  | 1023 | 0         | LRR-RLP   | same      |
| At_RLP23       | LRR-RLP   | Tpa | c0004_01429  | 64.068 | 295  | 175 | 467  | 4.92E-106 | LRR-RLP   | same      |
| At_RLP23       | LRR-RLP   | Tpa | c0166_00004  | 69.495 | 872  | 1   | 868  | 0         | LRR-RLP   | same      |
| At_RLP23       | LRR-RLP   | Tpa | c0004_01478  | 69.495 | 872  | 1   | 868  | 0         | LRR-RLP   | same      |
| At_RLP30       | LRR-RLP   | Tpa | c0012_00051  | 65.605 | 157  | 630 | 786  | 2.75E-68  | LRR-RLP   | same      |
| At_RLP32       | LRR-RLP   | Tpa | c0246_00007  | 64.753 | 871  | 9   | 852  | 0         | LRR-RLP   | same      |
| At_RLP32       | LRR-RLP   | Tpa | c0016_00305  | 61.547 | 879  | 1   | 852  | 0         | LRR-RLP   | same      |
| At_RLP42       | LRR-RLP   | Tpa | c0004_01429  | 61.458 | 288  | 182 | 467  | 2.08E-99  | LRR-RLP   | same      |
| At_RLP42       | LRR-RLP   | Tpa | c0166_00004  | 67.664 | 869  | 1   | 862  | 0         | LRR-RLP   | same      |
| At_RLP42       | LRR-RLP   | Tpa | c0004_01478  | 67.664 | 869  | 1   | 862  | 0         | LRR-RLP   | same      |
| At_RPP1        | TNL       | Tpa | c0005_00285  | 60.697 | 201  | 64  | 264  | 1.11E-80  | TX        | different |
| At_RPP13       | CNL       | Tpa | c0007_00166  | 62.102 | 847  | 1   | 833  | 0         | NL        | different |
| At_RPP2a       | TNL       | Tpa | c0006_00829  | 66.234 | 154  | 2   | 155  | 1.06E-66  | TX        | different |
| At_RPP2a       | TNL       | Tpa | c0006_00830  | 67.843 | 255  | 161 | 414  | 3.19E-96  | NL        | different |
| At_RPP39       | CNL       | Tpa | c0015_00366  | 65.877 | 211  | 1   | 211  | 2.76E-87  | CNL       | same      |
| At_RPP39       | CNL       | Tpa | c0015_00307  | 75.214 | 234  | 1   | 234  | 3.31E-120 | CN        | different |
| At_RPP39       | CNL       | Tpa | c1198_00001  | 74.194 | 279  | 1   | 279  | 8.71E-145 | CN        | different |
| At_RPP4        | TNL       | Tpa | c0006_00829  | 68.182 | 154  | 3   | 156  | 1.93E-68  | TX        | different |
| At_RPP5        | TNL       | Tpa | c0006_00829  | 71.069 | 159  | 1   | 159  | 3.02E-70  | TX        | different |
| At_RPP8        | CNL       | Tpa | c0003_02103  | 60.625 | 160  | 216 | 371  | 3.06E-57  | NL        | different |
| At_RPP8        | CNL       | Tpa | c0023_00078  | 77.381 | 252  | 1   | 252  | 2.10E-130 | CN        | different |
| At_RPS2        | NL        | Tpa | c0006_01486  | 84.048 | 909  | 1   | 909  | 0         | CNL       | different |
| At_SOBR1       | LRR-RLK   | Tpa | c0004_01545  | 83.488 | 648  | 1   | 641  | 0         | LRR-RLK   | same      |
| At_WRR12       | TNL       | Tpa | c0016_00185  | 62.064 | 688  | 11  | 691  | 0         | TNL       | same      |
| At_WRR4a       | TNL       | Tpa | c0026_00082  | 64.641 | 181  | 1   | 180  | 1.53E-78  | TX        | different |
| At_WRR4b       | TNL       | Tpa | c0009_00368  | 61.818 | 165  | 14  | 178  | 7.07E-65  | TX        | different |
| At_WRR4b       | TNL       | Tpa | c0026_00082  | 70.556 | 180  | 1   | 180  | 9.11E-88  | TX        | different |
| At_WRR4b       | TNL       | Tpa | c0026_00083  | 65.289 | 363  | 12  | 370  | 1.66E-154 | TNL       | same      |
| At_WRR9        | NL        | Tpa | c0026_00082  | 64.804 | 179  | 5   | 183  | 1.29E-76  | TX        | different |
| At_WRR9        | NL        | Tpa | c0026_00083  | 62.259 | 363  | 15  | 373  | 4.56E-146 | TNL       | different |
| Bju_WRR1       | CNL       | Tpa | c0023_00078  | 72.332 | 253  | 1   | 248  | 2.93E-122 | CN        | different |
| Bna_LepR3/Rlm2 | LRR-RLP   | Tpa | c0246_00007  | 62.371 | 776  | 180 | 948  | 0         | LRR-RLP   | same      |
| Bna_MPK9       | Other-RLK | Tpa | c0002_01170  | 80.841 | 428  | 82  | 506  | 0         | Other-RLK | same      |
| Bol_FocBo1     | TNL       | Tpa | c0006_00830  | 78.012 | 1187 | 160 | 1341 | 0         | NL        | different |
| Bra_cRa/cRb    | TNL       | Tpa | c0005_00285  | 60.674 | 178  | 61  | 237  | 2.77E-68  | TX        | different |
| Bra_Crr1a      | TNL       | Tpa | c0005_00285  | 65.116 | 172  | 62  | 232  | 6.13E-75  | TX        | different |
| Bra_Crr1a      | TNL       | Tpa | c0006_01108  | 64.366 | 1159 | 66  | 1217 | 0         | TNL       | same      |

---

\*note: Aha=Arabidopsis halleri, Aly=Arabidopsis lyrata, Aal=Arabis alpina, Bvu=Barbarea vulgaris, Bst=Boechera stricta, Bcr=Brassica cretica, Csa=Camelina sativa, Cgr=Capsella grandiflora, Cbp=Capsella bursa-pastoris, Cru= Capsella rubella, Chi=Cardamine hirsuta, Esa=Eutrema salsugineum, Lal=Leavenworthia alabamica, Lme=Lepidium meyenii, Rra=Raphanus raphanistrum, Rsa=Raphanus sativus, Sal=Sinapis alba, Sir=Sisymbrium irio, Spa=Schrenkiella parvula, Tpa=Thlaspi arvense, Main RGA classes, NLR= nucleotide-binding site (NBS) -leucine rich repeats (LRR), RLK= receptor-like protein kinases (RLKs), RLP= receptor-like proteins. NLRs subclasses, CN= coiled-coil (CC)-NBS, CNL, NBS, NL= NBS-LRR, TNL= Toll/Interleukin-1 receptor (TIR)-NBS-LRR, TN= TIR-NBS, TX= TIR with unknown domains, Other-NLR= NLR with other domains; RLK subclasses, LRR-RLK, Lysin motif (Lysm )-RLK, Other (other-receptor)-RLK; RLP subclasses, LRR-RLP and Lysm-RLP.
